# Supplementary material for: Unveiling the reverse reactivity and composition profile of copolymers from synthesized and separated 3-/7-(prop-2-ynyl)oxepan-2-one isomers: implications for precise polymer structure prediction
Source: Royal Society of Chemistry journal article supplement (doi:10.1039/d4py00071d), 2024-01-01
Supplement: d4py00071d1.pdf [file d4py00071d1.pdf]

## Supporting information

# Unveiling the reverse reactivity and composition profile of copolymers from synthesized and separated 3-/7-(prop- 2-ynyl)oxepan-2-one isomers: Implications for precise polymer structure prediction

*Robert Mundil*<sup>†,\*</sup>, *Livia Kanizsová*<sup>§</sup>, *Petr Toman*<sup>§</sup>, *Olga Kočková*<sup>§</sup>, and *Mariusz Uchman*<sup>†,\*</sup>

<sup>†</sup> Department of Physical and Macromolecular Chemistry, Faculty of Science, Charles  
University, Hlavova, 2030, 128 40 Prague 2, Czech Republic

<sup>§</sup> Institute of Macromolecular Chemistry CAS, Heyrovského nám. 2, 162 00 Prague 6, Czech  
Republic

## EXPERIMENTAL SECTION AND METHODS

**General Considerations and Materials.** All operations were performed under dry nitrogen using vacuum/inert manifold and standard Schlenk techniques. Toluene (Acros Organics, 99.85%, Extra dry over molecular sieve) and benzyl alcohol (Acros Organics, 98+%, Extra dry) were used as received. 1,5,7-triazobicyclo[4.4.0]dec-5-ene (Aldrich, 98%) was transferred to a Schlenk flask, stored under nitrogen, and used as received.  $\epsilon$ -Caprolactone (Aldrich, 97%) was dried over  $\text{CaH}_2$ , distilled and stored in a fridge under nitrogen over molecular sieves. 3/7-(prop-2-ynyl)oxepan-2-one was synthesized according to a procedure previously published in the literature,<sup>1</sup> and the resulting mixture of both isomers was separated by silica gel column chromatography using an 8:2 cyclohexane/ethyl acetate mixture as the mobile phase. Both isomers were dissolved in dry toluene and dried by azeotropic distillation immediately before use.

**(Co)polymerization of 3/7-(prop-2-ynyl)oxepan-2-one initiated by benzyl alcohol and catalyzed by 1,5,7-triazobicyclo[4.4.0]dec-5-ene.** In a typical (co)polymerization procedure, 7-(prop-2-ynyl)oxepan-2-one (0.22 g, 1.45 mmol, 25 eq.) was introduced to the flame-dried Schlenk flask equipped with a magnetic stirring bar. The monomer was dissolved in dry toluene, dried by azeotropic distillation, and dissolved in the desired volume of dry toluene (4.4 ml). Then, a solution of benzyl alcohol (6.0  $\mu\text{l}$ , 57.8  $\mu\text{mol}$ , 1 eq.) in toluene was added, and the whole mixture or aliquot (kinetic investigation) was transferred to the capped reaction vial designed for microwave synthesis (Biotage). These vials were heated, sealed, left standing to cool down under vacuum, and filled with nitrogen prior to use. The calculated amount of catalyst, 1,5,7-triazobicyclo[4.4.0]dec-5-ene, (16.1 mg, 115.6  $\mu\text{mol}$ , 2.0 eq.) was dissolved in toluene, and polymerization was started by adding the catalyst solution to the reaction vial. The reaction mixture was magnetically stirred at a controlled reaction temperature (30 °C) for an allotted polymerization

time. Polymerization was quenched with a solution of benzoic acid in toluene, subsequently collecting a sample for  $^1\text{H}$  NMR analysis (monomer conversion determination). Toluene was evaporated via a rotary evaporator, and the crude polymer was precipitated with hexane, extracted with cyclohexane/ethyl acetate, and dried *in vacuo* to constant weight. Other (co)polymerization kinetic experiments were performed using the same protocol.

**Nuclear Magnetic Resonance Spectroscopy.**  $^1\text{H}$ ,  $^{13}\text{C}$  and DOSY NMR spectra were recorded on a Bruker Avance MSL 400 MHz spectrometer at room temperature in  $\text{CDCl}_3$ . Approximately 5-10 mg of sample was directly dissolved into the NMR tube in 0.6 ml of  $\text{CDCl}_3$ . The chemical shifts were calibrated using the residual resonances of the solvent.

**Gas chromatography-mass spectrometry (GC-MS).** GC-MS analysis was performed on a Perkin Elmer Clarus 680 Gas Chromatograph directly coupled with a Perkin Elmer Clarus SQ 8 T Mass spectrometer detector using a capillary column DB-35MS (30 m, 0.25 mm, 0.25  $\mu\text{m}$ ) and the following temperature program in the gas chromatograph: the initial temperature of 50  $^\circ\text{C}$  was increased to 150  $^\circ\text{C}$  at 20  $^\circ\text{C}\cdot\text{min}^{-1}$  and then increased to 180  $^\circ\text{C}$  at 5  $^\circ\text{C}\cdot\text{min}^{-1}$  and to 320  $^\circ\text{C}$  at 10  $^\circ\text{C}\cdot\text{min}^{-1}$  and then held isothermally to complete the analysis. The temperature of the injector was 200  $^\circ\text{C}$ . The carrier gas was helium, at a flow rate of 1  $\text{ml}\cdot\text{min}^{-1}$ . For GC-MS detection, an electron ionization system was used with an ionization energy of 70 eV, at an ion source temperature of 190  $^\circ\text{C}$ , a scan mass range of 15-620  $m/z$ , and an interface line temperature of 300  $^\circ\text{C}$ . The compounds were identified by comparison of the mass spectra with MS spectra found in NIST (version 14) and Wiley Libraries (version 9).

**Pyrolysis-gas chromatography-mass spectrometry (Py-GC-MS).** Sample was directly applied into the ribbon filament using a pipette tip. The filament was inserted in a Pyroprobe 5000 Series (CDS Analytical). Pyrolysis was performed at 750 °C for 5s. The pyrolysate was transferred through a transfer line at 300°C into an injector, at the same temperature, connected to a GC-MS (Perkin Elmer Clarus 680 Gas Chromatograph directly coupled with a Perkin Elmer Clarus SQ 8 T Mass spectrometer detector) using a capillary column DB-35MS (30 m, 0.25 mm, 0.25 µm) and the following temperature program in the gas chromatograph: the initial temperature 50 °C was held for 5 min, increased to 340 °C at 10 °C·min<sup>-1</sup>, and then held isothermally to complete the analysis. The temperature of the injector was 300 °C. The carrier gas was helium, at a flow rate of 1 ml·min<sup>-1</sup> and a split of 50 ml·min<sup>-1</sup>. For GC-MS detection, an electron ionization system was used, with an ionization energy of 70 eV, at an ion source temperature of 190 °C, a scan mass range of m/z 15-620, and an interface line temperature of 300 °C. The compounds were identified by comparing mass spectra with MS spectra found in NIST (version 14) and Wiley Libraries (version 9).

**Size exclusion chromatography (SEC).** SEC analysis was performed using a Deltachrom SDS 030 pump (Watrex Ltd., Prague, Czech Republic) at a flow rate of 0.5 ml·min<sup>-1</sup> and a MIDAS autosampler (Spark Ltd., Emmen, Holland). Two PLgel 10-µm mixed B LS columns (Polymer Laboratories, Shropshire, UK) were used in a series, each of which separating in the molecular weight range of approximately  $5 \times 10^2 \leq M \leq 1 \times 10^7$  (related to PS standards), according to the manufacturer's instructions. The following detectors were used: (i) a UV/VIS DeltaChrom UVD 200 detector (Watrex) at a flow cell volume of 8 µl and operating at a wavelength  $\lambda=264$  nm, and (ii) an evaporative light-scattering photometer PL ELS 1000 (Polymer Laboratories) with nitrogen as a carrier gas, setting the temperatures of the nebulizer and evaporator to 100 °C and 180 °C,

respectively. Tetrahydrofuran was used as the mobile phase at room temperature.  $M_w$  and  $M_n$  were determined by constructing a calibration curve with polystyrene standards with molecular weights ranging from 666 to  $2 \times 10^6$ . Data were collected into Clarity software (DataApex Ltd.).

**Matrix assisted laser desorption/ionization in combination with time-of-flight detector mass spectrometry (MALDI-TOF MS).** MALDI-TOF MS mass spectra were acquired with the UltrafleXtreme TOF - TOF mass spectrometer (Bruker Daltonics, Bremen, Germany) equipped with a 2000 Hz smartbeam-II laser (355 nm) in positive ion reflectron mode. Panoramic pulsed ion extraction and external calibration were used for molecular weight assignment. Using the dried droplet method, the solutions of the sample ( $10 \text{ mg}\cdot\text{ml}^{-1}$ ) and matrix 2,5-dihydroxybenzoic acid (DHB;  $20 \text{ mg}\cdot\text{ml}^{-1}$ ) in tetrahydrofuran were mixed in a volume ratio of 4:20. Lastly,  $1 \mu\text{l}$  of the resulting mixture was deposited on the ground-steel target.

**Differential scanning calorimetry (DSC).** DSC measurements were performed on a module Discovery DSC 250 Auto (TA Instruments, USA) at a rate of  $10 \text{ }^\circ\text{C min}^{-1}$  for both heating and cooling in a range from  $-80$  to  $100 \text{ }^\circ\text{C}$ . Glass transition and melting temperatures were obtained from the second heating run.

**Quantum chemical calculations.** The ground state molecular geometries of the reactants, intermediates, and products (Scheme 3) dissolved in toluene were determined by minimizing the total energy calculated using the hybrid Density Functional Theory (DFT) method B3LYP<sup>2, 3</sup> and the Pople basis set 6-311G(d). This method was successfully used for an extensive theoretical and experimental study of similar reactions conducted by Nifant'ev et al.<sup>4</sup> Solvation effects were described using the polarizable continuum model (PCM) with the integral equation formalism variant.<sup>5, 6</sup> For each reactant, different initial geometries were considered to find the lowest-energy

conformer. The resulting equilibrium structures were checked by normal mode analysis (no imaginary frequency was found).

The transition states on the TBD-catalyzed ring-opening polymerization (ROP) reaction path (Scheme 3) were found using the Berny algorithm with an initial guess obtained from the relaxed potential energy surface scans along the appropriate internal coordinates. All transition states were confirmed by normal mode analysis showing just one imaginary frequency and intrinsic reaction coordinate (IRC) calculations performed on both sides of the transition state. IRC calculations were followed by geometry optimizations, which proved that the reaction proceeds from the given transition state to the expected reaction intermediate. Thermodynamic parameters were calculated for room temperature (298.15 K) and 1 atm pressure.

Based on the optimized geometries of 3- and 7-isomer, single-point calculations were performed using the same method, but with the basis set supplemented by diffuse functions on heavy atoms (6-311G+(d)) for population analysis. Electrostatic potential (ESP)-derived atomic charges were fitted according to the Merz-Singh-Kollman scheme.<sup>7, 8</sup> In terms of atomic charges, this model is presumably more realistic than the standard Mulliken population analysis, among others, because the results are considerably less dependent on the quantum chemical method and basis set.<sup>9</sup> A very fine fitting point grid with 10 layers and 33 points per unit area (Gaussian 16 options IOP(6/41=10,6/42=33)) was used to increase the numerical accuracy.

All quantum chemical calculations were performed using the Gaussian 16 program package,<sup>10</sup> electrostatic potential maps were constructed in GaussView,<sup>11</sup> and condensed Fukui functions<sup>12</sup> were evaluated from the Gaussian 16 output using the frontier molecular orbital approach in the Multiwfn program.<sup>13, 14</sup>

## RESULTS

### Characterization of monomers

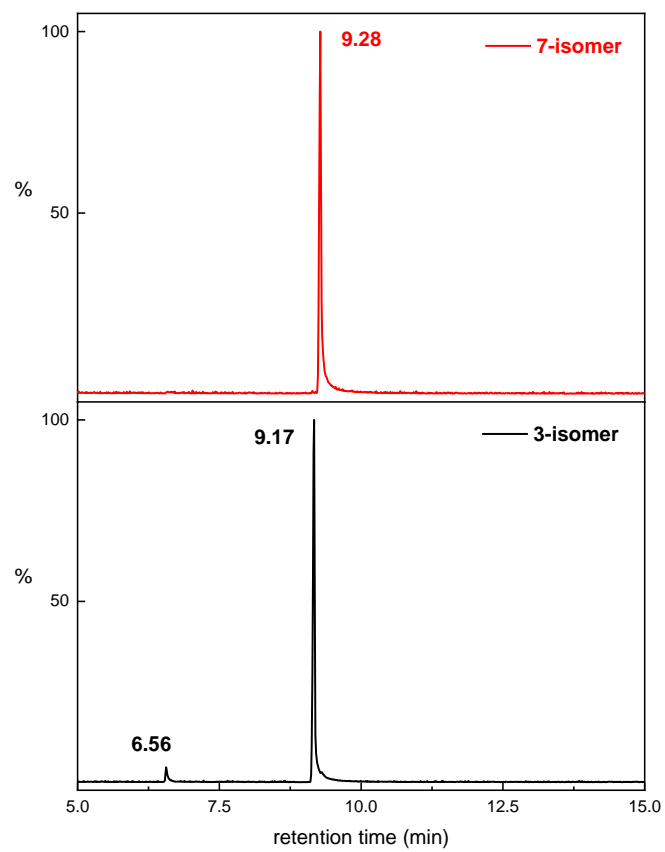

**Figure S1.** GC analysis of the separated isomers 3- and 7-(prop-2-ynyl)oxepan-2-one

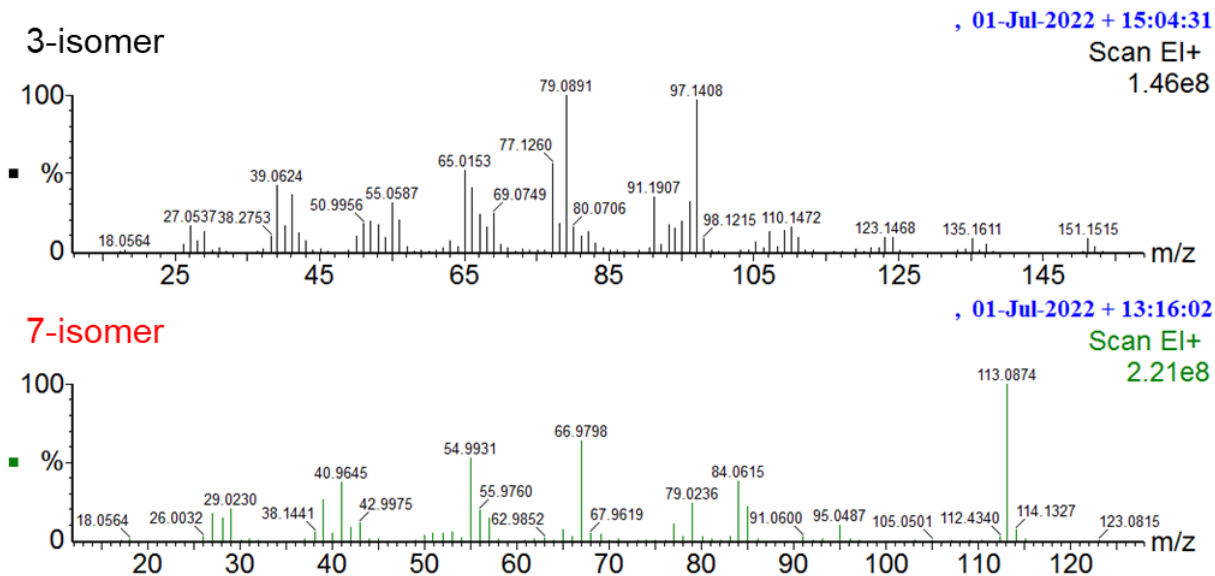

**Figure S2.** EI-MS analysis of the separated isomers 3- and 7-(prop-2-ynyl)oxepan-2-one

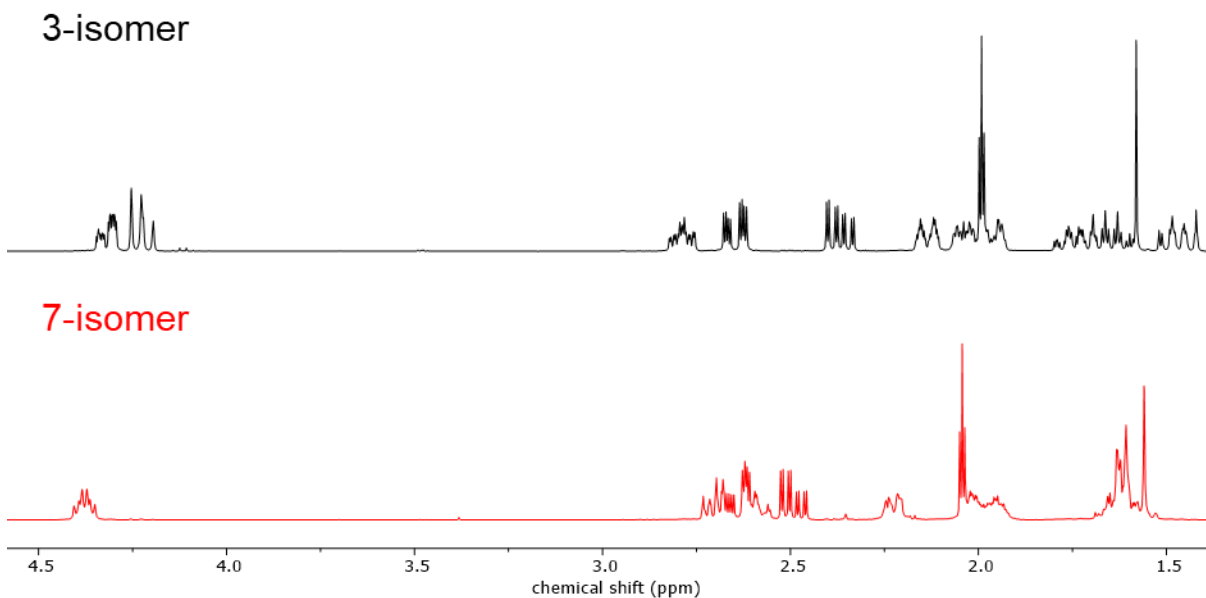

**Figure S3.**  $^1\text{H}$  NMR spectra of the separated isomers 3- and 7-(prop-2-ynyl)oxepan-2-one



## Quantum chemical calculations

*Population analysis and reaction energies:* Molecular conformations of the 3- and 7-isomer were calculated using quantum chemical methods to elucidate the influence of the monomer chemical structure on its reactivity. The resulting lowest-energy equilibrium conformations are shown in Figure S4, and Cartesian coordinates are shown in the Table S8.

For standalone isomers (Figure S4), the expected binding site (carbonyl carbon) of benzyl alcohol is rather well accessible since the propargyl groups are oriented to the opposite direction, although the proximity of this group to the binding site of 3-isomer may partially hinder its reactivity. There are also other conformers with the rotated propargyl groups, with only slightly higher energy. Therefore, these conformers may also be thermally accessible at room temperature.

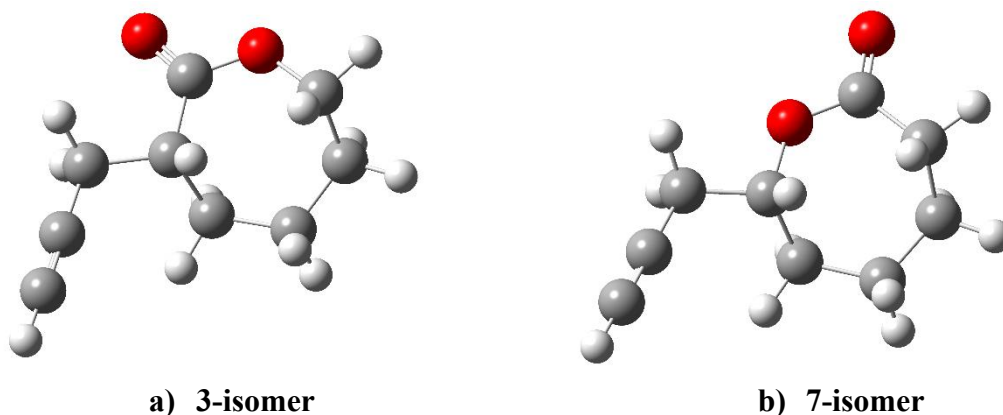

**Figure S4.** Equilibrium molecular conformations of the studied isomers dissolved in toluene calculated using the PCM-B3LYP/6-311G(d) method

The calculated electrostatic potentials mapped onto the electron density surfaces with the isovalue 0.0004 a.u. for both studied isomers dissolved in toluene are shown in Figure S5, and the ESP-derived atomic charges together with the condensed Fukui functions are given in Table S1. Carbonyl carbon (3C, Figure S6) has the greatest positive charge due to two adjacent negatively

charged oxygen atoms and to the greatest nucleophilic Fukui function  $f^+$  value of both isomers. Consequently, this is the most susceptible site for nucleophilic attack by the benzyl alcohol. When comparing the atomic charges and nucleophilic Fukui functions  $f^+$  on the carbonyl carbons of both isomers, we found that the atomic charge value of 7-isomer is slightly higher than that of 3-isomer, but the 3-isomer has a slightly higher  $f^+$  value than the 7-isomer. Thus, the population analysis unambiguously shows that the carbonyl carbon is the most susceptible site for the nucleophilic attack. Nevertheless, a more reliable comparison of the reactivity of both isomers is necessary to calculate the whole reaction path of the ROP (*vide infra*).

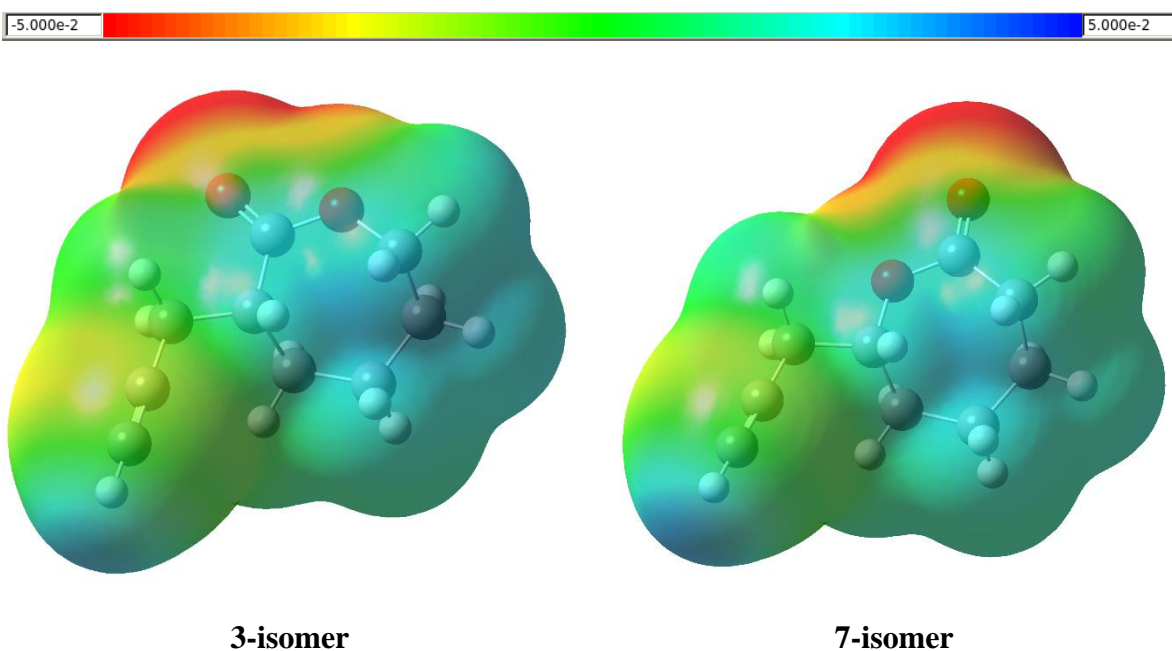

**Figure S5.** Electrostatic potentials mapped onto the electron density surface (isovalue 0.0004 a.u.) for 3-isomer and 7-isomer in toluene. Color scale range from -0.05 a.u. (red) to 0.05 a.u. (blue). Computational method: PCM-B3LYP/6-311+G(d)//6-311G(d)

**Table S1.** Atomic charges derived from the electrostatic potential according to the Merz-Singh-Kollman scheme and condensed to atom Fukui functions for electrophilic ( $f^-$ ) and nucleophilic ( $f^+$ ) attack for 3-isomer (a) and 7-isomer (b) dissolved in toluene. Calculated using the PCM B3LYP/6-311+G(d)//6-311G(d) method. Numbering of atoms is shown in Figure S6.

**a) 3-isomer**

| Atom | Charge | $f^-$  | $f^+$        |
|------|--------|--------|--------------|
| 1    | O      | -0.490 | 0.047        |
| 2    | O      | -0.596 | 0.243        |
| 3    | C      | 0.748  | <b>0.349</b> |
| 4    | C      | 0.041  | 0.055        |
| 5    | H      | 0.068  | 0.005        |
| 6    | C      | -0.062 | 0.012        |
| 7    | H      | 0.043  | 0.002        |
| 8    | H      | 0.043  | 0.007        |
| 9    | C      | -0.011 | 0.001        |
| 10   | H      | 0.023  | 0.000        |
| 11   | H      | 0.017  | 0.000        |
| 12   | C      | -0.072 | 0.001        |
| 13   | H      | 0.058  | 0.000        |
| 14   | H      | 0.025  | 0.000        |
| 15   | C      | 0.179  | 0.006        |
| 16   | H      | 0.015  | 0.001        |
| 17   | H      | 0.069  | 0.003        |
| 18   | C      | -0.315 | 0.036        |
| 19   | H      | 0.146  | 0.005        |
| 20   | H      | 0.147  | 0.021        |
| 21   | C      | 0.130  | 0.214        |
| 22   | C      | -0.540 | 0.272        |
| 23   | H      | 0.332  | 0.018        |

**b) 7-isomer**

| Atom |   | Charge | f <sup>-</sup> | f <sup>+</sup> |
|------|---|--------|----------------|----------------|
| 1    | O | -0.535 | 0.064          | 0.084          |
| 2    | O | -0.598 | 0.528          | 0.216          |
| 3    | C | 0.787  | 0.083          | <b>0.314</b>   |
| 4    | C | -0.227 | 0.074          | 0.070          |
| 5    | H | 0.072  | 0.014          | 0.053          |
| 6    | H | 0.066  | 0.007          | 0.025          |
| 7    | C | 0.102  | 0.019          | 0.052          |
| 8    | H | 0.010  | 0.008          | 0.062          |
| 9    | H | 0.004  | 0.004          | 0.021          |
| 10   | C | -0.064 | 0.004          | 0.018          |
| 11   | H | 0.028  | 0.001          | 0.016          |
| 12   | H | 0.022  | 0.001          | 0.025          |
| 13   | C | -0.133 | 0.002          | 0.006          |
| 14   | H | 0.052  | 0.002          | 0.001          |
| 15   | H | 0.076  | 0.000          | 0.004          |
| 16   | C | 0.401  | 0.020          | 0.010          |
| 17   | H | 0.026  | 0.003          | 0.006          |
| 18   | C | -0.316 | 0.018          | 0.004          |
| 19   | H | 0.163  | 0.001          | 0.002          |
| 20   | H | 0.151  | 0.005          | 0.003          |
| 21   | C | 0.106  | 0.061          | 0.004          |
| 22   | C | -0.526 | 0.078          | 0.006          |
| 23   | H | 0.334  | 0.005          | 0.002          |

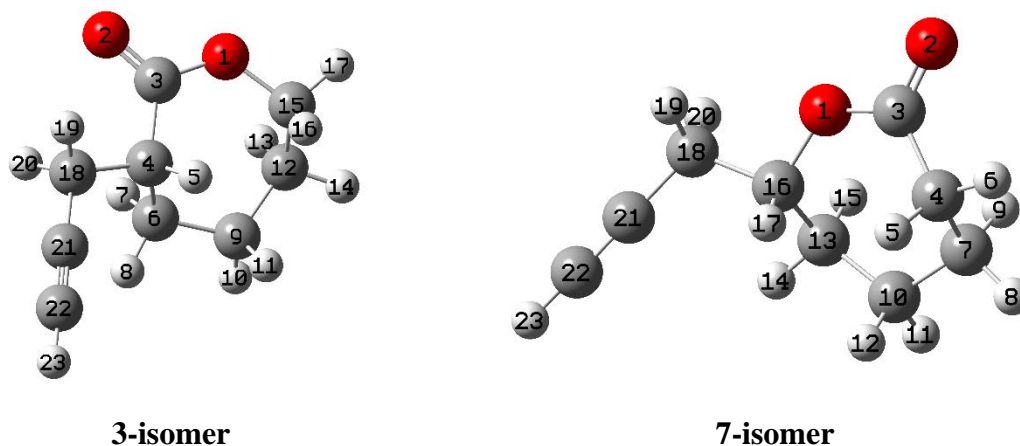

**Figure S6.** Numbering of atoms in 3- and 7-isomer

*Investigation of the ROP mechanism:*

The studied system consisted of polymerized isomers (3- and 7-isomer), BnOH, and TBD, which acted as a catalyst dissolved in toluene. This three-compound system may include three bimolecular and one trimolecular complex, of which the bimolecular complex of BnOH-TBD has the lowest Gibbs free energy. Thus, the energy of the most stable complex was taken as the ground state of the system.

Based on the previous DFT studies of six-membered and larger lactones,<sup>15, 16</sup> and experimental data,<sup>15, 17</sup> we used the so-called “donor-acceptor” mechanism to calculate the ROP reaction route rather than an alternative “amide” mechanism.<sup>4</sup> The energy profiles of the reactions of 3- and 7-isomer were calculated by initially performing a conformational analysis of the initial structure I1 and the first transition structure TS12 (Scheme 3). For both isomers, the free energy of the most stable structure I1 in vacuum is between 2 and 3 kcal·mol<sup>-1</sup> above the ground state, corroborating the value of 2.8 kcal·mol<sup>-1</sup> found by Nifant’ev *et al.*<sup>4</sup> for the complex of the unsubstituted  $\epsilon$ -caprolactone with methanol and TBD. In toluene, this value increases to approximately 5

kcal·mol<sup>-1</sup>. Since both isomers and BnOH are bound to the TBD molecule only by one relatively weak and flexible hydrogen bond, we did not explore transition states in the highly flat potential energy surface of the structure I1 (Scheme 3), but started the reaction route calculation with the lowest energy conformer of the transition state structure TS12 (Scheme 3). The energy profiles of the initial step of the ROP of both isomers are shown in Table S2a. The results demonstrate that the TS12 free energies of the 7-isomer are slightly above 21 kcal·mol<sup>-1</sup>, in line with the value 21.3 kcal·mol<sup>-1</sup> found by Nifant'ev et al.,<sup>4</sup> but the values of the 3-isomer are noticeably higher (23.0 kcal·mol<sup>-1</sup> in vacuum and 26.6 kcal·mol<sup>-1</sup> in toluene).

The free energies of the intermediate state I2 range from 15.8 to 22.7 kcal·mol<sup>-1</sup>. Transformation of I2 into I3 consists of cleavage and formation of a new NH-O hydrogen bond upon rotation of the TBD molecule around the stronger N-HO bond with a low barrier (less than 3 kcal·mol<sup>-1</sup>) and a low reaction energy (from -1 to 2 kcal·mol<sup>-1</sup>). From state I3, the reaction proceeds exothermally to its relaxed conformer I3r (Table S3). Although barriers for this exothermic step are also rather low (1.5 kcal·mol<sup>-1</sup> for 3-isomer and less than 4 kcal·mol<sup>-1</sup> for the 7-isomer), free energies of this transition state with respect to the ground state are rather high in the case of 7-isomer (20.4 kcal·mol<sup>-1</sup> in vacuum and 22.7 kcal·mol<sup>-1</sup> in toluene). Nevertheless, these values are still considerably lower than the free energy of the TS12 state of the 3-isomer. With the 7-isomer, the reaction from the relaxed I3r state to the I4 state proceeds directly through the transition state TS34, which has a slightly higher energy than TS12. With the 3-isomer, this reaction, in turn, involves another conformer, I3r2 (Table S3), in which the alcohol moiety lies in the more distant position from the TBD molecule. The energy of the TS34 state of the 3-isomer is significantly lower than that of the TS12 state. The free energy of the state I4 ranges from 4.0 to 8.0 kcal·mol<sup>-1</sup>

and, as such, is much lower than that of the transition state TS34, which hinders the reverse reaction.

The reaction from the I4 to the I5 state consists of the cleavage of the weak NH-O hydrogen bond and relaxation (straightening) of the released chain. As with the starting structure I1, the potential energy surface is very flat and complex at this step, so we did not look for a reaction pathway. The free energy of the final state I5 ranged from 0.1 to 2.9 kcal·mol<sup>-1</sup> with respect to the ground state. In all cases, the free energy of I5 is lower than the one of I1, thus the entire reaction from I1 to I5 is exothermic. In the real system, the hydrogen bond cleaved in the reaction from I4 to I5 would be probably replaced by hydrogen bonds to surrounding molecules, which would make the reaction energy even more negative.

**Table S2:** Gibbs free energies in kcal·mol<sup>-1</sup> of reaction intermediates and transition states for the TBD catalyzed ROP in vacuum and toluene, calculated by the PCM B3LYP/6 311G(d) method (the highest energy transition states of both isomers are shown in bold). All values are with respect to the Gibbs free energy of the ground state of the system, i.e. complex BnOH-TBD

a) *initial step of the polymerization*

|                | I1   | TS12         | I2    | TS23  | I3    | TSr          | I3r   | TSr2  | I3r2  | TS34         | I4   | I5   |
|----------------|------|--------------|-------|-------|-------|--------------|-------|-------|-------|--------------|------|------|
| <i>Vacuum</i>  |      |              |       |       |       |              |       |       |       |              |      |      |
| 3-is           | 2.39 | <b>23.02</b> | 20.01 | 21.58 | 19.05 | 20.54        | 14.95 | 16.70 | 15.45 | 20.61        | 5.41 | 1.21 |
| 7-is           | 2.54 | 21.23        | 15.83 | 18.44 | 16.68 | 20.44        | 15.56 | -     | -     | <b>21.33</b> | 4.04 | 0.13 |
| <i>Toluene</i> |      |              |       |       |       |              |       |       |       |              |      |      |
| 3-is           | 4.79 | <b>26.57</b> | 22.65 | 23.95 | 21.67 | 23.27        | 18.09 | 19.16 | 18.21 | 22.24        | 8.03 | 2.88 |
| 7-is           | 5.05 | 21.58        | 18.30 | 21.13 | 18.75 | <b>22.70</b> | 17.93 | -     | -     | 21.95        | 6.67 | 1.40 |

Calculations of the energy profiles of the next (co)polymerization step, i.e. addition of another 3- or 7-isomer unit to the chain ending with either a 3- or 7-isomer unit, were performed in the same way, but restricted only to the toluene solution (Table S2b).

b) *next step of the (co)polymerization* (calculated only in toluene solution)

|           | I1   | TS12         | I2    | TS23         | I3    | TSr   | I3r   | TSr2  | I3r2  | TS34  | I4    | I5   |
|-----------|------|--------------|-------|--------------|-------|-------|-------|-------|-------|-------|-------|------|
| 3-is 3-is | 8.68 | <b>27.68</b> | 25.82 | 26.82        | 20.48 | 21.83 | 20.37 | -     | -     | 23.18 | 10.19 | 5.60 |
| 3-is 7-is | 8.44 | 28.37        | 26.96 | <b>29.70</b> | 27.43 | 27.69 | 20.85 | 22.30 | 20.99 | 24.04 | 10.48 | 4.68 |
| 7-is 3-is | 8.36 | <b>25.44</b> | 21.48 | 23.08        | 20.70 | 23.41 | 22.98 | -     | -     | 24.41 | 6.92  | 3.93 |
| 7-is 7-is | 7.40 | <b>25.96</b> | 23.05 | 24.13        | 22.41 | 24.37 | 22.42 | 23.65 | 21.18 | 23.77 | 9.12  | 4.22 |

The results show that the energies of the first transition state TS12 for addition of the next 3-isomer unit are significantly higher than those of the addition of a 7-isomer unit. In particular, the addition of a 3-isomer unit to the 7-isomer chain end is strongly disfavored due to not only the highest value (ca 28.4 kcal·mol<sup>-1</sup>) of the TS12 state energy but also the extremely high energy (ca 29.7 kcal·mol<sup>-1</sup>) of the transition state TS23. Except for this strongly disfavored reaction, the first transition state TS12 is the highest state of the whole reaction path.



**Table S3:**a) *initial step of the polymerization*

Optimized molecular conformations (in vacuum) and thermodynamic parameters (electronic energies (with the nuclear repulsion)  $E_{\text{DFT}}$ , sum of electronic and zero-point energies  $E_0$ , sum of electronic and thermal energies  $E_{298}$ , sum of electronic and thermal enthalpies  $H_{298}$ , and sum of electronic and thermal free energies  $G_{298}$ ) in vacuum and toluene solution (calculated by the PCM B3LYP/6-311G(d) method)

|                             | 3-isomer                                                                            |              |
|-----------------------------|-------------------------------------------------------------------------------------|--------------|
| State                       | BnOH-TBD                                                                            | 3-isomer     |
| Molecular geometry          | 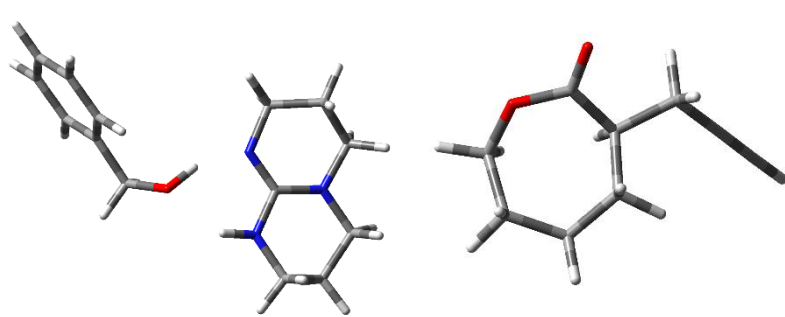 |              |
| <i>Vacuum</i>               |                                                                                     |              |
| $E_{\text{DFT}}$ (kcal/mol) | -493092.1104                                                                        | -314186.7625 |
| $E_0$ (kcal/mol)            | -492878.1956                                                                        | -314065.1060 |
| $E_{298}$ (kcal/mol)        | -492867.4037                                                                        | -314058.4544 |
| $H_{298}$ (kcal/mol)        | -492866.8113                                                                        | -314057.8621 |
| $G_{298}$ (kcal/mol)        | -492908.9316                                                                        | -314087.8238 |
| <i>Toluene</i>              |                                                                                     |              |
| $E_{\text{DFT}}$ (kcal/mol) | -493094.9932                                                                        | -314189.9527 |
| $E_0$ (kcal/mol)            | -492881.2691                                                                        | -314068.3089 |
| $E_{298}$ (kcal/mol)        | -492870.4509                                                                        | -314061.6635 |
| $H_{298}$ (kcal/mol)        | -492869.8579                                                                        | -314061.0712 |
| $G_{298}$ (kcal/mol)        | -492912.2512                                                                        | -314091.0178 |

**State**

**I1**

**TS12**

Molecular geometry

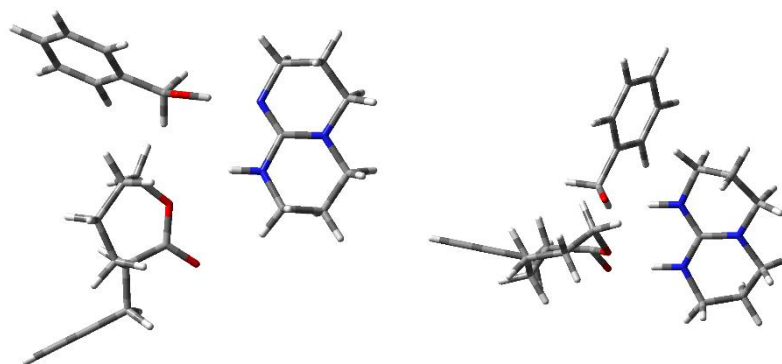

*Vacuum*

$E_{\text{DFT}}$  (kcal/mol)

-807285.6334

-807270.8908

$E_0$  (kcal/mol)

-806949.9043

-806935.0009

$E_{298}$  (kcal/mol)

-806930.8908

-806917.3943

$H_{298}$  (kcal/mol)

-806930.2984

-806916.8019

$G_{298}$  (kcal/mol)

-806994.3702

-806973.7321

*Toluene*

$E_{\text{DFT}}$  (kcal/mol)

-807289.8382

-807276.5790

$E_0$  (kcal/mol)

-806954.3019

-806939.9344

$E_{298}$  (kcal/mol)

-806935.2858

-806922.6145

$H_{298}$  (kcal/mol)

-806934.6935

-806922.0222

$G_{298}$  (kcal/mol)

-806998.4785

-806976.6977

**State**

**I2**

**TS23**

Molecular geometry

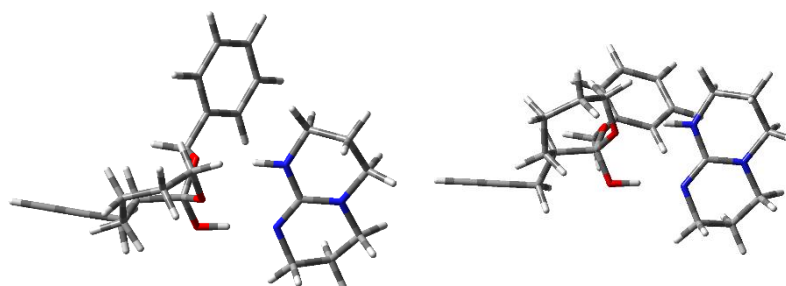

*Vacuum*

|                             |              |              |
|-----------------------------|--------------|--------------|
| $E_{\text{DFT}}$ (kcal/mol) | -807273.9332 | -807273.5304 |
| $E_0$ (kcal/mol)            | -806937.1175 | -806936.8213 |
| $E_{298}$ (kcal/mol)        | -806919.2680 | -806919.4306 |
| $H_{298}$ (kcal/mol)        | -806918.6757 | -806918.8382 |
| $G_{298}$ (kcal/mol)        | -806976.7435 | -806975.1772 |

*Toluene*

|                             |              |              |
|-----------------------------|--------------|--------------|
| $E_{\text{DFT}}$ (kcal/mol) | -807277.8554 | -807277.4715 |
| $E_0$ (kcal/mol)            | -806941.1995 | -806940.9541 |
| $E_{298}$ (kcal/mol)        | -806923.3707 | -806923.5721 |
| $H_{298}$ (kcal/mol)        | -806922.7783 | -806922.9797 |
| $G_{298}$ (kcal/mol)        | -806980.6159 | -806979.3175 |

**State**

**I3**

**TSr**

Molecular geometry

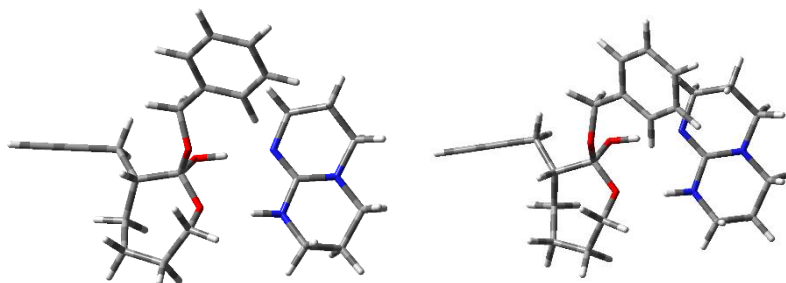

*Vacuum*

|                             |              |              |
|-----------------------------|--------------|--------------|
| $E_{\text{DFT}}$ (kcal/mol) | -807274.7535 | -807274.1819 |
| $E_0$ (kcal/mol)            | -806937.8843 | -806937.5907 |
| $E_{298}$ (kcal/mol)        | -806920.0443 | -806920.2758 |
| $H_{298}$ (kcal/mol)        | -806919.4519 | -806919.6834 |
| $G_{298}$ (kcal/mol)        | -806977.7061 | -806976.2114 |

*Toluene*

|                             |              |              |
|-----------------------------|--------------|--------------|
| $E_{\text{DFT}}$ (kcal/mol) | -807278.6930 | -807277.9937 |
|-----------------------------|--------------|--------------|

|                      |              |              |
|----------------------|--------------|--------------|
| $E_0$ (kcal/mol)     | -806942.0309 | -806941.6551 |
| $E_{298}$ (kcal/mol) | -806924.2178 | -806924.3471 |
| $H_{298}$ (kcal/mol) | -806923.6255 | -806923.7547 |
| $G_{298}$ (kcal/mol) | -806981.5973 | -806980.0009 |

**State**

**I3r**

**TSr2**

Molecular geometry

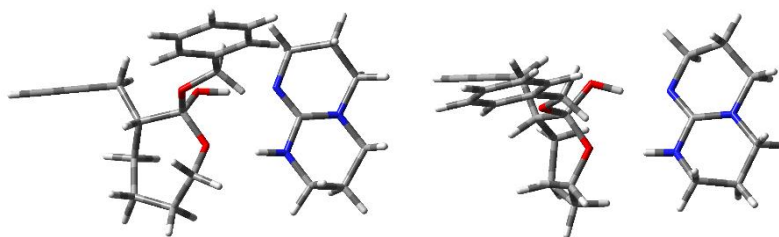

*Vacuum*

|                             |              |              |
|-----------------------------|--------------|--------------|
| $E_{\text{DFT}}$ (kcal/mol) | -807278.0662 | -807277.0733 |
| $E_0$ (kcal/mol)            | -806941.3576 | -806940.6918 |
| $E_{298}$ (kcal/mol)        | -806923.4209 | -806923.2709 |
| $H_{298}$ (kcal/mol)        | -806922.8285 | -806922.6785 |
| $G_{298}$ (kcal/mol)        | -806981.8088 | -806980.0511 |

*Toluene*

|                             |              |              |
|-----------------------------|--------------|--------------|
| $E_{\text{DFT}}$ (kcal/mol) | -807281.8306 | -807281.0309 |
| $E_0$ (kcal/mol)            | -806945.2726 | -806944.9049 |
| $E_{298}$ (kcal/mol)        | -806927.3780 | -806927.4840 |
| $H_{298}$ (kcal/mol)        | -806926.7856 | -806926.8916 |
| $G_{298}$ (kcal/mol)        | -806985.1747 | -806984.1136 |

**State**

**I3r2**

**TS34**

Molecular geometry

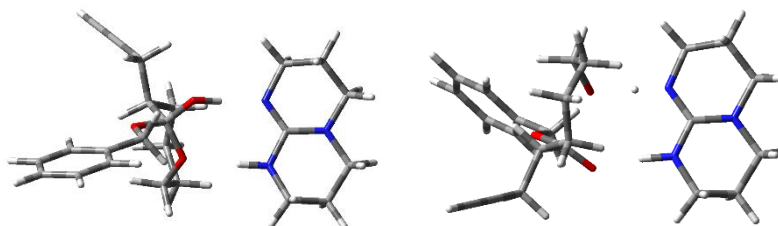

*Vacuum*

$E_{\text{DFT}}$  (kcal/mol)

-807278.2373

-807270.9047

$E_0$  (kcal/mol)

-806941.3281

-806936.1035

$E_{298}$  (kcal/mol)

-806923.4861

-806918.2659

$H_{298}$  (kcal/mol)

-806922.8938

-806917.6735

$G_{298}$  (kcal/mol)

-806981.3093

-806976.1461

*Toluene*

$E_{\text{DFT}}$  (kcal/mol)

-807282.1417

-807276.7632

$E_0$  (kcal/mol)

-806945.4590

-806941.6519

$E_{298}$  (kcal/mol)

-806927.6359

-806923.8194

$H_{298}$  (kcal/mol)

-806927.0435

-806923.2270

$G_{298}$  (kcal/mol)

-806985.0630

-806981.0306

**State**

**I4**

**I5**

Molecular geometry

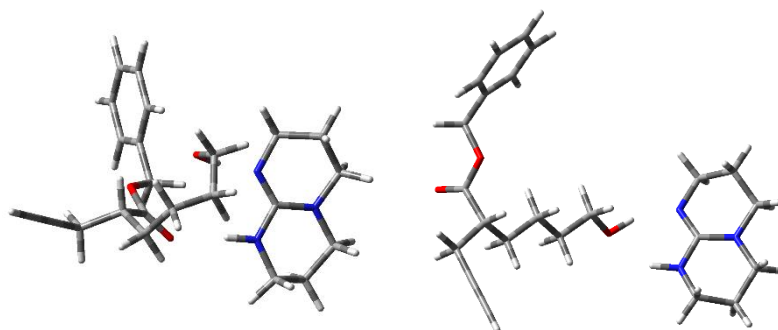

*Vacuum*

$E_{\text{DFT}}$  (kcal/mol)

-807285.9611

-807286.0669

|                             |              |              |
|-----------------------------|--------------|--------------|
| $E_0$ (kcal/mol)            | -806949.7719 | -806950.2425 |
| $E_{298}$ (kcal/mol)        | -806930.9679 | -806931.0853 |
| $H_{298}$ (kcal/mol)        | -806930.3756 | -806930.4929 |
| $G_{298}$ (kcal/mol)        | -806991.3456 | -806995.5424 |
| <i>Toluene</i>              |              |              |
| $E_{\text{DFT}}$ (kcal/mol) | -807289.5158 | -807291.2244 |
| $E_0$ (kcal/mol)            | -806953.5269 | -806955.5349 |
| $E_{298}$ (kcal/mol)        | -806934.7010 | -806936.3896 |
| $H_{298}$ (kcal/mol)        | -806934.1086 | -806935.7973 |
| $G_{298}$ (kcal/mol)        | -806995.2406 | -807000.3931 |

| 7-isomer                    |                                                                                                                                                                         |                                                                                       |
|-----------------------------|-------------------------------------------------------------------------------------------------------------------------------------------------------------------------|---------------------------------------------------------------------------------------|
| State                       | BnOH-TBD                                                                                                                                                                | 7-isomer                                                                              |
| Molecular geometry          | 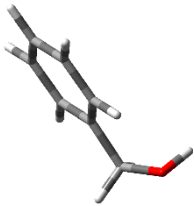  |  |
| <i>Vacuum</i>               |                                                                                                                                                                         |                                                                                       |
| $E_{\text{DFT}}$ (kcal/mol) | -493092.1104                                                                                                                                                            | -314188.7111                                                                          |
| $E_0$ (kcal/mol)            | -492878.1956                                                                                                                                                            | -314067.2182                                                                          |
| $E_{298}$ (kcal/mol)        | -492867.4037                                                                                                                                                            | -314060.5466                                                                          |
| $H_{298}$ (kcal/mol)        | -492866.8113                                                                                                                                                            | -314059.9542                                                                          |
| $G_{298}$ (kcal/mol)        | -492908.9316                                                                                                                                                            | -314090.0564                                                                          |
| <i>Toluene</i>              |                                                                                                                                                                         |                                                                                       |
| $E_{\text{DFT}}$ (kcal/mol) | -493094.9932                                                                                                                                                            | -314191.9501                                                                          |

|                      |              |              |
|----------------------|--------------|--------------|
| $E_0$ (kcal/mol)     | -492881.2691 | -314070.4229 |
| $E_{298}$ (kcal/mol) | -492870.4509 | -314063.7789 |
| $H_{298}$ (kcal/mol) | -492869.8579 | -314063.1865 |
| $G_{298}$ (kcal/mol) | -492912.2512 | -314093.1902 |

**State**

**I1**

**TS12**

Molecular geometry

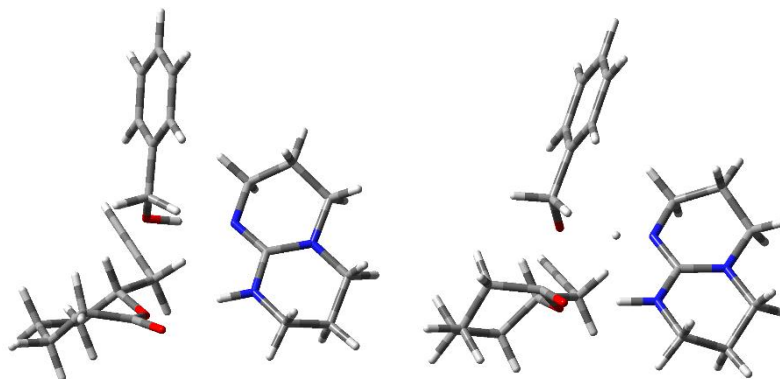

*Vacuum*

|                             |              |              |
|-----------------------------|--------------|--------------|
| $E_{\text{DFT}}$ (kcal/mol) | -807289.3498 | -807274.6460 |
| $E_0$ (kcal/mol)            | -806953.7001 | -806938.9963 |
| $E_{298}$ (kcal/mol)        | -806934.8121 | -806921.3871 |
| $H_{298}$ (kcal/mol)        | -806934.2197 | -806920.7948 |
| $G_{298}$ (kcal/mol)        | -806996.4529 | -806977.7563 |

*Toluene*

|                             |              |              |
|-----------------------------|--------------|--------------|
| $E_{\text{DFT}}$ (kcal/mol) | -807293.1010 | -807280.3499 |
| $E_0$ (kcal/mol)            | -806957.6854 | -806944.7449 |
| $E_{298}$ (kcal/mol)        | -806938.7704 | -806927.0498 |
| $H_{298}$ (kcal/mol)        | -806938.1780 | -806926.4574 |
| $G_{298}$ (kcal/mol)        | -807000.3943 | -806983.8569 |

State

I2

TS23

Molecular geometry

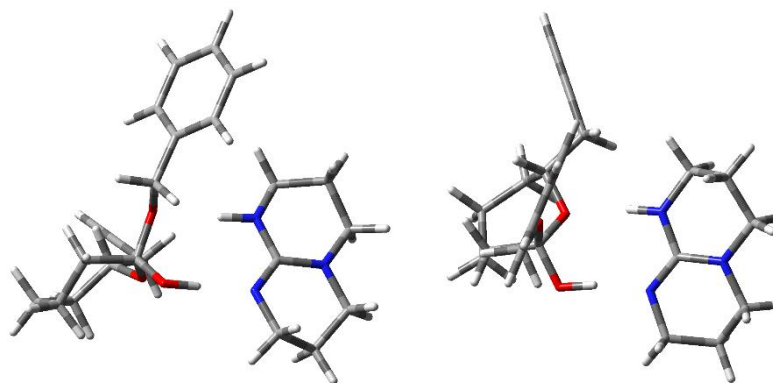

*Vacuum*

$E_{\text{DFT}}$  (kcal/mol)

-807279.6850

-807277.4943

$E_0$  (kcal/mol)

-806943.0237

-806941.2120

$E_{298}$  (kcal/mol)

-806925.1227

-806923.7102

$H_{298}$  (kcal/mol)

-806924.5303

-806923.1178

$G_{298}$  (kcal/mol)

-806983.1573

-806980.5525

*Toluene*

$E_{\text{DFT}}$  (kcal/mol)

-807283.6038

-807282.2684

$E_0$  (kcal/mol)

-806947.1112

-806945.7960

$E_{298}$  (kcal/mol)

-806929.2310

-806928.4341

$H_{298}$  (kcal/mol)

-806928.6380

-806927.8417

$G_{298}$  (kcal/mol)

-806987.1413

-806984.3113



State

I3

TSr

Molecular geometry

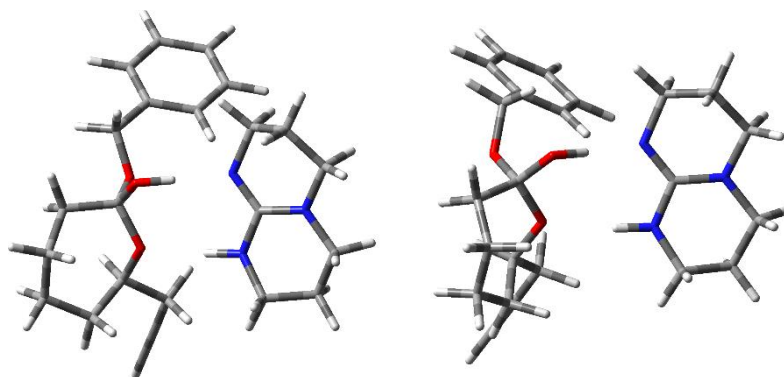

*Vacuum*

$E_{\text{DFT}}$  (kcal/mol)

-807279.2369

-807276.8155

$E_0$  (kcal/mol)

-806942.4376

-806940.1610

$E_{298}$  (kcal/mol)

-806924.5805

-806922.8436

$H_{298}$  (kcal/mol)

-806923.9882

-806922.2512

$G_{298}$  (kcal/mol)

-806982.3039

-806978.5501

*Toluene*

$E_{\text{DFT}}$  (kcal/mol)

-807283.3111

-807280.7273

$E_0$  (kcal/mol)

-806946.6883

-806944.3251

$E_{298}$  (kcal/mol)

-806928.8470

-806927.0027

$H_{298}$  (kcal/mol)

-806928.2546

-806926.4103

$G_{298}$  (kcal/mol)

-806986.6958

-806982.7412

**State**

**I3r**

**TS34**

Molecular geometry

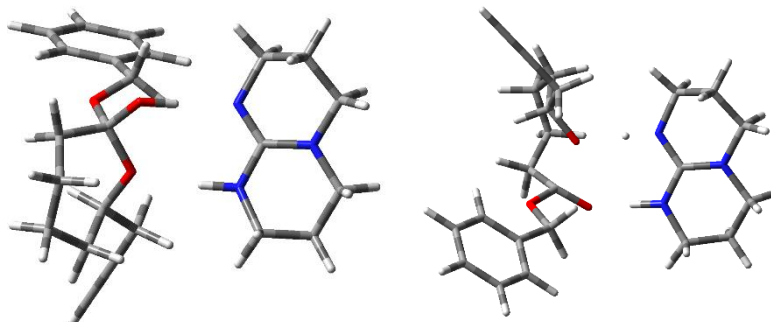

*Vacuum*

$E_{\text{DFT}}$  (kcal/mol)

-807280.0764

-807273.2289

$E_0$  (kcal/mol)

-806943.3311

-806937.9151

$E_{298}$  (kcal/mol)

-806925.4415

-806920.1798

$H_{298}$  (kcal/mol)

-806924.8491

-806919.5874

$G_{298}$  (kcal/mol)

-806983.4309

-806977.6565

*Toluene*

$E_{\text{DFT}}$  (kcal/mol)

-807284.1383

-807279.6613

$E_0$  (kcal/mol)

-806947.6283

-806944.1996

$E_{298}$  (kcal/mol)

-806929.7443

-806926.4455

$H_{298}$  (kcal/mol)

-806929.1513

-806925.8531

$G_{298}$  (kcal/mol)

-806987.5153

-806983.4917

**State**

**I4**

**I5**

Molecular geometry

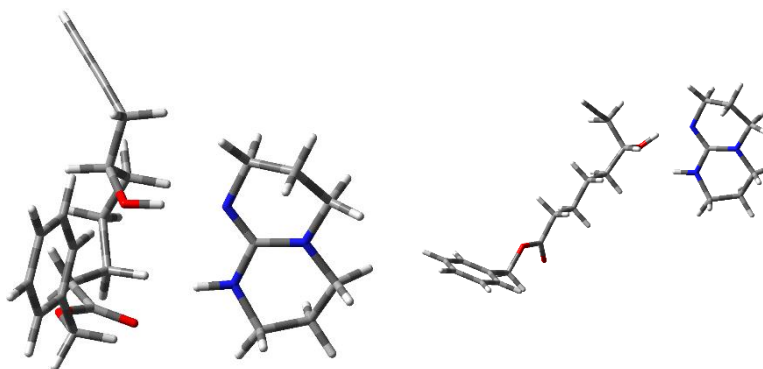

*Vacuum*

|                             |              |              |
|-----------------------------|--------------|--------------|
| $E_{\text{DFT}}$ (kcal/mol) | -807289.4799 | -807288.6470 |
| $E_0$ (kcal/mol)            | -806953.2477 | -806953.1717 |
| $E_{298}$ (kcal/mol)        | -806934.5749 | -806934.0001 |
| $H_{298}$ (kcal/mol)        | -806933.9819 | -806933.4077 |
| $G_{298}$ (kcal/mol)        | -806994.9463 | -806998.8538 |

*Toluene*

|                             |              |              |
|-----------------------------|--------------|--------------|
| $E_{\text{DFT}}$ (kcal/mol) | -807293.0598 | -807293.8143 |
| $E_0$ (kcal/mol)            | -806957.0334 | -806958.5231 |
| $E_{298}$ (kcal/mol)        | -806938.3518 | -806939.3527 |
| $H_{298}$ (kcal/mol)        | -806937.7595 | -806938.7604 |
| $G_{298}$ (kcal/mol)        | -806998.7741 | -807004.0370 |

b) next step of the (co)polymerization (calculated only in toluene solution)

Thermodynamic parameters of DFT-optimized structures in the second step of the TBD catalyzed ROP of 3-/7-isomer in toluene solution calculated using the PCM B3LYP/6-311G(d) method: electronic energies (with the nuclear repulsion)  $E_{\text{DFT}}$ , sum of electronic and zero-point energies  $E_0$ , sum of electronic and thermal energies  $E_{298}$ , sum of electronic and thermal enthalpies  $H_{298}$ , and sum of electronic and thermal free energies  $G_{298}$

| <b>Addition of another 3-isomer unit to the 3-isomer chain end</b> |               |               |
|--------------------------------------------------------------------|---------------|---------------|
| <b>State</b>                                                       | <b>I1</b>     | <b>TS12</b>   |
| <i>Toluene</i>                                                     |               |               |
| $E_{\text{DFT}}$ (kcal/mol)                                        | -1121486.1973 | -1121472.1263 |
| $E_0$ (kcal/mol)                                                   | -1121028.5438 | -1121014.3144 |
| $E_{298}$ (kcal/mol)                                               | -1121001.3080 | -1120988.4397 |
| $H_{298}$ (kcal/mol)                                               | -1121000.7157 | -1120987.8473 |
| $G_{298}$ (kcal/mol)                                               | -1121085.6114 | -1121066.6023 |
| <br>                                                               |               |               |
| <b>State</b>                                                       | <b>I2</b>     | <b>TS23</b>   |
| <i>Toluene</i>                                                     |               |               |
| $E_{\text{DFT}}$ (kcal/mol)                                        | -1121473.6316 | -1121473.4990 |
| $E_0$ (kcal/mol)                                                   | -1121015.0085 | -1121015.2136 |
| $E_{298}$ (kcal/mol)                                               | -1120988.9128 | -1120989.5046 |
| $H_{298}$ (kcal/mol)                                               | -1120988.3205 | -1120988.9122 |
| $G_{298}$ (kcal/mol)                                               | -1121068.4691 | -1121067.4626 |

| <b>State</b>                | <b>I3</b>     | <b>TSr</b>    |
|-----------------------------|---------------|---------------|
| <i>Toluene</i>              |               |               |
| $E_{\text{DFT}}$ (kcal/mol) | -1121479.3482 | -1121478.4541 |
| $E_0$ (kcal/mol)            | -1121020.7583 | -1121020.1879 |
| $E_{298}$ (kcal/mol)        | -1120994.5786 | -1120994.5008 |
| $H_{298}$ (kcal/mol)        | -1120993.9863 | -1120993.9084 |
| $G_{298}$ (kcal/mol)        | -1121073.8036 | -1121072.4588 |

| <b>State</b>                | <b>I3r</b>    | <b>TS34</b>   |
|-----------------------------|---------------|---------------|
| <i>Toluene</i>              |               |               |
| $E_{\text{DFT}}$ (kcal/mol) | -1121479.6087 | -1121473.9951 |
| $E_0$ (kcal/mol)            | -1121020.8562 | -1121017.0956 |
| $E_{298}$ (kcal/mol)        | -1120994.7430 | -1120990.9209 |
| $H_{298}$ (kcal/mol)        | -1120994.1507 | -1120990.3285 |
| $G_{298}$ (kcal/mol)        | -1121073.9216 | -1121071.1084 |

| <b>State</b>                | <b>I4</b>     | <b>I5</b>     |
|-----------------------------|---------------|---------------|
| <i>Toluene</i>              |               |               |
| $E_{\text{DFT}}$ (kcal/mol) | -1121486.8835 | -1121488.7838 |
| $E_0$ (kcal/mol)            | -1121028.8946 | -1121030.9666 |
| $E_{298}$ (kcal/mol)        | -1121001.7548 | -1121003.5859 |
| $H_{298}$ (kcal/mol)        | -1121001.1625 | -1121002.9935 |
| $G_{298}$ (kcal/mol)        | -1121084.0954 | -1121088.6875 |

**Addition of another 3-isomer unit to the 7-isomer chain end**

| <b>State</b>                | <b>I1</b>     | <b>TS12</b>   |
|-----------------------------|---------------|---------------|
| <i>Toluene</i>              |               |               |
| $E_{\text{DFT}}$ (kcal/mol) | -1121488.2355 | -1121473.1855 |
| $E_0$ (kcal/mol)            | -1121030.9830 | -1121015.6096 |
| $E_{298}$ (kcal/mol)        | -1121003.7202 | -1120989.6464 |
| $H_{298}$ (kcal/mol)        | -1121003.1278 | -1120989.0534 |
| $G_{298}$ (kcal/mol)        | -1121088.0167 | -1121068.0863 |

| <b>State</b>                | <b>I2</b>     | <b>TS23</b>   |
|-----------------------------|---------------|---------------|
| <i>Toluene</i>              |               |               |
| $E_{\text{DFT}}$ (kcal/mol) | -1121473.8659 | -1121473.5781 |
| $E_0$ (kcal/mol)            | -1121015.7414 | -1121015.3398 |
| $E_{298}$ (kcal/mol)        | -1120989.5121 | -1120989.7135 |
| $H_{298}$ (kcal/mol)        | -1120988.9197 | -1120989.1212 |
| $G_{298}$ (kcal/mol)        | -1121069.5033 | -1121066.7629 |

| <b>State</b>                | <b>I3</b>     | <b>TSr</b>    |
|-----------------------------|---------------|---------------|
| <i>Toluene</i>              |               |               |
| $E_{\text{DFT}}$ (kcal/mol) | -1121474.1647 | -1121473.9682 |
| $E_0$ (kcal/mol)            | -1121015.8769 | -1121015.8512 |
| $E_{298}$ (kcal/mol)        | -1120989.7462 | -1120990.1948 |
| $H_{298}$ (kcal/mol)        | -1120989.1532 | -1120989.6025 |

|                      |               |               |
|----------------------|---------------|---------------|
| $G_{298}$ (kcal/mol) | -1121069.0295 | -1121068.7741 |
|----------------------|---------------|---------------|

| <b>State</b> | <b>I3r</b> | <b>TSr2</b> |
|--------------|------------|-------------|
|--------------|------------|-------------|

*Toluene*

|                             |               |               |
|-----------------------------|---------------|---------------|
| $E_{\text{DFT}}$ (kcal/mol) | -1121480.5141 | -1121479.7308 |
|-----------------------------|---------------|---------------|

|                  |               |               |
|------------------|---------------|---------------|
| $E_0$ (kcal/mol) | -1121022.3227 | -1121021.8125 |
|------------------|---------------|---------------|

|                      |               |               |
|----------------------|---------------|---------------|
| $E_{298}$ (kcal/mol) | -1120996.1261 | -1120996.1279 |
|----------------------|---------------|---------------|

|                      |               |               |
|----------------------|---------------|---------------|
| $H_{298}$ (kcal/mol) | -1120995.5331 | -1120995.5350 |
|----------------------|---------------|---------------|

|                      |               |               |
|----------------------|---------------|---------------|
| $G_{298}$ (kcal/mol) | -1121075.6077 | -1121074.1638 |
|----------------------|---------------|---------------|

| <b>State</b> | <b>I3r2</b> | <b>TS34</b> |
|--------------|-------------|-------------|
|--------------|-------------|-------------|

*Toluene*

|                             |               |               |
|-----------------------------|---------------|---------------|
| $E_{\text{DFT}}$ (kcal/mol) | -1121480.9234 | -1121475.3679 |
|-----------------------------|---------------|---------------|

|                  |               |               |
|------------------|---------------|---------------|
| $E_0$ (kcal/mol) | -1121022.4576 | -1121018.8902 |
|------------------|---------------|---------------|

|                      |               |               |
|----------------------|---------------|---------------|
| $E_{298}$ (kcal/mol) | -1120996.3564 | -1120992.6553 |
|----------------------|---------------|---------------|

|                      |               |               |
|----------------------|---------------|---------------|
| $H_{298}$ (kcal/mol) | -1120995.7640 | -1120992.0629 |
|----------------------|---------------|---------------|

|                      |               |               |
|----------------------|---------------|---------------|
| $G_{298}$ (kcal/mol) | -1121075.4665 | -1121072.4212 |
|----------------------|---------------|---------------|

| <b>State</b> | <b>I4</b> | <b>I5</b> |
|--------------|-----------|-----------|
|--------------|-----------|-----------|

*Toluene*

|                             |               |               |
|-----------------------------|---------------|---------------|
| $E_{\text{DFT}}$ (kcal/mol) | -1121487.1399 | -1121491.2999 |
|-----------------------------|---------------|---------------|

|                  |               |               |
|------------------|---------------|---------------|
| $E_0$ (kcal/mol) | -1121029.6470 | -1121033.8450 |
|------------------|---------------|---------------|

|                      |               |               |
|----------------------|---------------|---------------|
| $E_{298}$ (kcal/mol) | -1121002.4143 | -1121006.4674 |
|----------------------|---------------|---------------|

|                      |               |               |
|----------------------|---------------|---------------|
| $H_{298}$ (kcal/mol) | -1121001.8220 | -1121005.8744 |
| $G_{298}$ (kcal/mol) | -1121085.9810 | -1121091.7773 |

**Addition of another 7-isomer unit to the 3-isomer chain end**

| <b>State</b>                | <b>I1</b>     | <b>TS12</b>   |
|-----------------------------|---------------|---------------|
| <i>Toluene</i>              |               |               |
| $E_{\text{DFT}}$ (kcal/mol) | -1121489.0395 | -1121475.2553 |
| $E_0$ (kcal/mol)            | -1121031.6199 | -1121017.9427 |
| $E_{298}$ (kcal/mol)        | -1121004.3841 | -1120991.9676 |
| $H_{298}$ (kcal/mol)        | -1121003.7917 | -1120991.3752 |
| $G_{298}$ (kcal/mol)        | -1121088.1001 | -1121071.0143 |

| <b>State</b>                | <b>I2</b>     | <b>TS23</b>   |
|-----------------------------|---------------|---------------|
| <i>Toluene</i>              |               |               |
| $E_{\text{DFT}}$ (kcal/mol) | -1121481.0183 | -1121479.6231 |
| $E_0$ (kcal/mol)            | -1121022.2844 | -1121021.1850 |
| $E_{298}$ (kcal/mol)        | -1120996.2020 | -1120995.5199 |
| $H_{298}$ (kcal/mol)        | -1120995.6090 | -1120994.9275 |
| $G_{298}$ (kcal/mol)        | -1121074.9814 | -1121073.3781 |

| <b>State</b>                | <b>I3</b>     | <b>TSr</b>    |
|-----------------------------|---------------|---------------|
| <i>Toluene</i>              |               |               |
| $E_{\text{DFT}}$ (kcal/mol) | -1121480.2879 | -1121478.6957 |



|                      |               |               |
|----------------------|---------------|---------------|
| $E_0$ (kcal/mol)     | -1121021.6996 | -1121020.3755 |
| $E_{298}$ (kcal/mol) | -1120995.5362 | -1120994.6520 |
| $H_{298}$ (kcal/mol) | -1120994.9438 | -1120994.0597 |
| $G_{298}$ (kcal/mol) | -1121075.7558 | -1121073.0462 |

| <b>State</b>                | <b>I3r</b>    | <b>TS34</b>   |
|-----------------------------|---------------|---------------|
| <i>Toluene</i>              |               |               |
| $E_{\text{DFT}}$ (kcal/mol) | -1121481.3998 | -1121477.1732 |
| $E_0$ (kcal/mol)            | -1121021.9631 | -1121019.5322 |
| $E_{298}$ (kcal/mol)        | -1120996.0878 | -1120993.5345 |
| $H_{298}$ (kcal/mol)        | -1120995.4954 | -1120992.9421 |
| $G_{298}$ (kcal/mol)        | -1121073.4785 | -1121072.0516 |

| <b>State</b>                | <b>I4</b>     | <b>I5</b>     |
|-----------------------------|---------------|---------------|
| <i>Toluene</i>              |               |               |
| $E_{\text{DFT}}$ (kcal/mol) | -1121491.9345 | -1121492.1624 |
| $E_0$ (kcal/mol)            | -1121033.9774 | -1121034.8095 |
| $E_{298}$ (kcal/mol)        | -1121006.9104 | -1121007.3999 |
| $H_{298}$ (kcal/mol)        | -1121006.3181 | -1121006.8075 |
| $G_{298}$ (kcal/mol)        | -1121089.5390 | -1121092.5260 |

**Addition of another 7-isomer unit to the 7-isomer chain end**

| <b>State</b>                | <b>I1</b>     | <b>TS12</b>   |
|-----------------------------|---------------|---------------|
| <i>Toluene</i>              |               |               |
| $E_{\text{DFT}}$ (kcal/mol) | -1121491.4008 | -1121477.6955 |
| $E_0$ (kcal/mol)            | -1121034.4462 | -1121020.2726 |
| $E_{298}$ (kcal/mol)        | -1121007.1646 | -1120994.3220 |
| $H_{298}$ (kcal/mol)        | -1121006.5722 | -1120993.7290 |
| $G_{298}$ (kcal/mol)        | -1121091.2352 | -1121072.6734 |

| <b>State</b>                | <b>I2</b>     | <b>TS23</b>   |
|-----------------------------|---------------|---------------|
| <i>Toluene</i>              |               |               |
| $E_{\text{DFT}}$ (kcal/mol) | -1121480.8986 | -1121480.3703 |
| $E_0$ (kcal/mol)            | -1121022.5317 | -1121022.2825 |
| $E_{298}$ (kcal/mol)        | -1120996.4022 | -1120996.5685 |
| $H_{298}$ (kcal/mol)        | -1120995.8098 | -1120995.9761 |
| $G_{298}$ (kcal/mol)        | -1121075.5788 | -1121074.5014 |

| <b>State</b>                | <b>I3</b>     | <b>TSr</b>    |
|-----------------------------|---------------|---------------|
| <i>Toluene</i>              |               |               |
| $E_{\text{DFT}}$ (kcal/mol) | -1121480.9189 | -1121479.8985 |
| $E_0$ (kcal/mol)            | -1121022.6459 | -1121021.9638 |
| $E_{298}$ (kcal/mol)        | -1120996.4681 | -1120996.2817 |
| $H_{298}$ (kcal/mol)        | -1120995.8757 | -1120995.6893 |

|                      |               |               |
|----------------------|---------------|---------------|
| $G_{298}$ (kcal/mol) | -1121076.2245 | -1121074.2598 |
|----------------------|---------------|---------------|

| <b>State</b> | <b>I3r</b> | <b>TSr2</b> |
|--------------|------------|-------------|
|--------------|------------|-------------|

*Toluene*

|                             |               |               |
|-----------------------------|---------------|---------------|
| $E_{\text{DFT}}$ (kcal/mol) | -1121480.8417 | -1121480.3160 |
|-----------------------------|---------------|---------------|

|                  |               |               |
|------------------|---------------|---------------|
| $E_0$ (kcal/mol) | -1121022.7739 | -1121022.3647 |
|------------------|---------------|---------------|

|                      |               |               |
|----------------------|---------------|---------------|
| $E_{298}$ (kcal/mol) | -1120996.5641 | -1120996.6482 |
|----------------------|---------------|---------------|

|                      |               |               |
|----------------------|---------------|---------------|
| $H_{298}$ (kcal/mol) | -1120995.9717 | -1120996.0558 |
|----------------------|---------------|---------------|

|                      |               |               |
|----------------------|---------------|---------------|
| $G_{298}$ (kcal/mol) | -1121076.2164 | -1121074.9814 |
|----------------------|---------------|---------------|

| <b>State</b> | <b>I3r2</b> | <b>TS34</b> |
|--------------|-------------|-------------|
|--------------|-------------|-------------|

*Toluene*

|                             |               |               |
|-----------------------------|---------------|---------------|
| $E_{\text{DFT}}$ (kcal/mol) | -1121481.7890 | -1121477.8792 |
|-----------------------------|---------------|---------------|

|                  |               |               |
|------------------|---------------|---------------|
| $E_0$ (kcal/mol) | -1121023.6028 | -1121020.8531 |
|------------------|---------------|---------------|

|                      |               |               |
|----------------------|---------------|---------------|
| $E_{298}$ (kcal/mol) | -1120997.4150 | -1120994.6979 |
|----------------------|---------------|---------------|

|                      |               |               |
|----------------------|---------------|---------------|
| $H_{298}$ (kcal/mol) | -1120996.8226 | -1120994.1055 |
|----------------------|---------------|---------------|

|                      |               |               |
|----------------------|---------------|---------------|
| $G_{298}$ (kcal/mol) | -1121077.4513 | -1121074.8591 |
|----------------------|---------------|---------------|

| <b>State</b> | <b>I4</b> | <b>I5</b> |
|--------------|-----------|-----------|
|--------------|-----------|-----------|

*Toluene*

|                             |               |               |
|-----------------------------|---------------|---------------|
| $E_{\text{DFT}}$ (kcal/mol) | -1121491.9912 | -1121493.5180 |
|-----------------------------|---------------|---------------|

|                  |               |               |
|------------------|---------------|---------------|
| $E_0$ (kcal/mol) | -1121034.3194 | -1121036.5854 |
|------------------|---------------|---------------|

|                      |               |               |
|----------------------|---------------|---------------|
| $E_{298}$ (kcal/mol) | -1121007.3033 | -1121009.1299 |
|----------------------|---------------|---------------|

|                      |               |               |
|----------------------|---------------|---------------|
| $H_{298}$ (kcal/mol) | -1121006.7103 | -1121008.5376 |
| $G_{298}$ (kcal/mol) | -1121089.5076 | -1121094.4072 |

*A note on artefact intermediate states.* In all standard quantum chemical methods, geometry optimization is based on the minimization of the total electronic energy of the molecule plus the nuclear repulsion energy (here  $E_{\text{DFT}}$ ). However, the Gibbs free energy  $G$  includes also the zero-point energy and thermal corrections. Consequently, some shallow intermediate states (local minima of  $E_{\text{DFT}}$ ) found by geometry optimization and IRC calculations do not need to be local minima of  $G$ . Intermediate states should be considered either thermally unstable at the given temperature, or even artefacts of the method if they occur at zero temperature due to zero-point energy corrections. Such artefact intermediate states (not shown in Table S3) were found for both isomers between TS12 and I2 and between I3 and TS34.

## Kinetic data

**Table S4.** Copolymerization of 3- and 7-(prop-2-ynyl)oxepan-2-one in toluene catalyzed by BnOH/TBD at 30 °C<sup>a</sup>

| entry | time (h) | conv. 3-is. <sup>b</sup> (%) | conv. 7-is. <sup>b</sup> (%) | $M_n^c$ (kg.mol <sup>-1</sup> ) | $\mathcal{D}^c$ |
|-------|----------|------------------------------|------------------------------|---------------------------------|-----------------|
| 1     | 1        | 8.4                          | 15.8                         | 0.5                             | 1.13            |
| 2     | 2        | 19.5                         | 46.5                         | 1.3                             | 1.18            |
| 3     | 3        | 24.3                         | 60.6                         | 1.5                             | 1.18            |
| 4     | 4        | 28.7                         | 66.7                         | 1.5                             | 1.28            |
| 5     | 5        | 36.1                         | 72.5                         | 1.6                             | 1.19            |

<sup>a</sup> $n_{\text{BnOH}} = 10.8 \mu\text{mol}$  (1 eq.), 3-is/7-is/BnOH/TBD = 12.5/12.5/1/2,  $c_M = 0.27\text{M}$ ; <sup>b</sup>determined by <sup>1</sup>H NMR; <sup>c</sup>apparent number-average molecular weights ( $M_n$ ) and dispersities ( $\mathcal{D}$ ) determined by SEC-ELS with PS calibration in THF at 25 °C

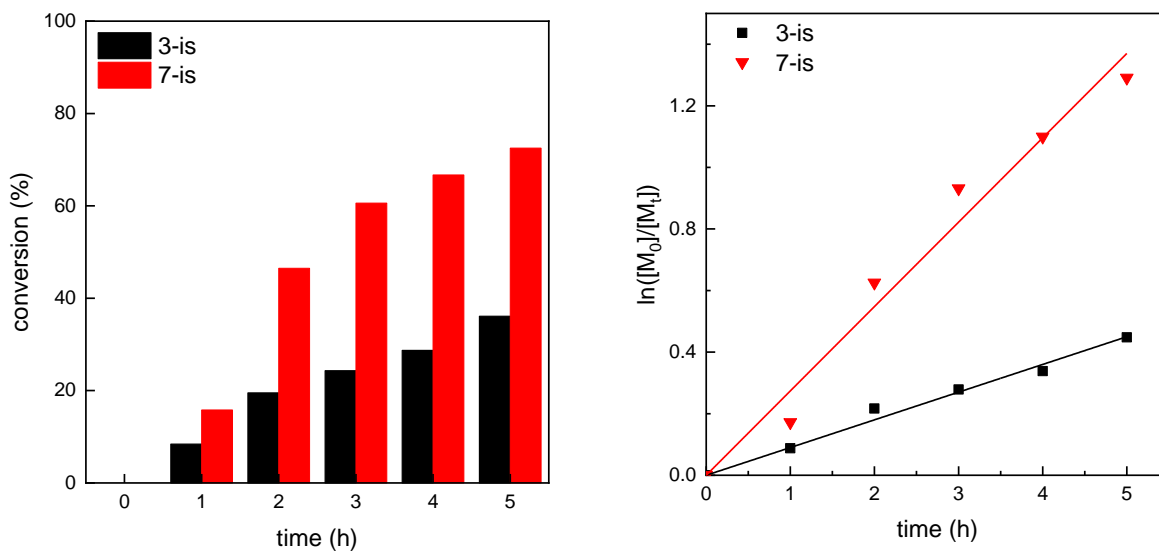

**Figure S7.** Kinetic plots of 3- and 7-(prop-2-ynyl)oxepan-2-one copolymerization in toluene catalyzed by BnOH/TBD at 30 °C

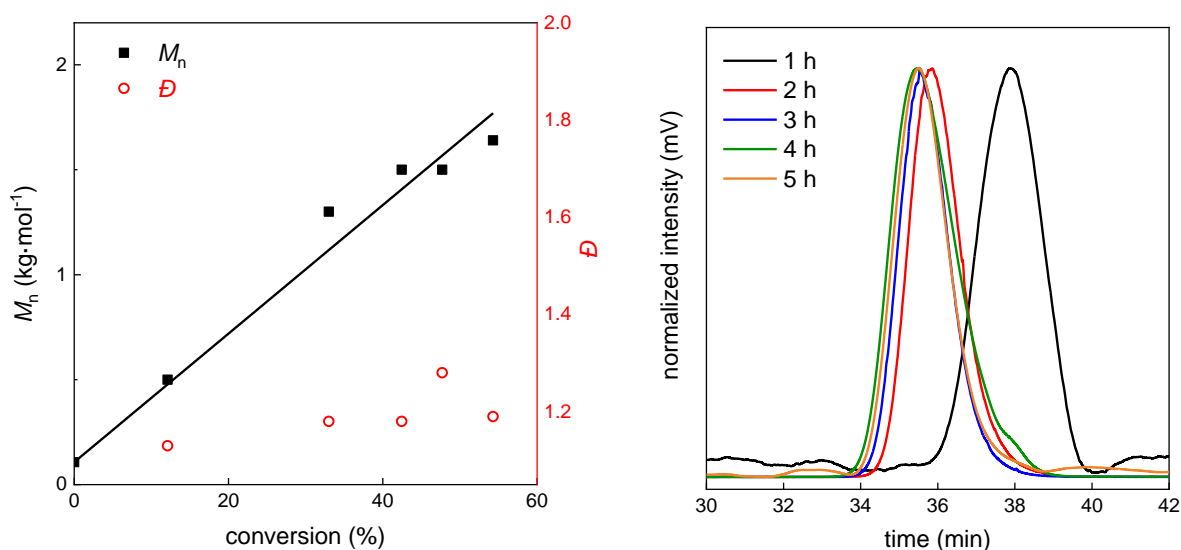

**Figure S8:** Kinetics of 3- and 7-(prop-2-ynyl)oxepan-2-one copolymerization in toluene catalyzed by BnOH/TBD at 30 °C: The apparent number-average molecular weights ( $M_n$ ) and dispersities ( $\mathcal{D}$ ) determined by SEC-ELS with PS calibration plotted vs. total monomer conversion (left). Corresponding SEC-ELS chromatograms (right).

**Table S5.** Polymerization of 7-(prop-2-ynyl)oxepan-2-one in toluene catalyzed by BnOH/TBD at 30 °C<sup>a</sup>

| entry | time (h) | conv. 7-is. <sup>b</sup> (%) | $M_n^c$ (kg·mol <sup>-1</sup> ) | $\mathcal{D}^c$ |
|-------|----------|------------------------------|---------------------------------|-----------------|
| 6     | 1        | 12.7                         | 1.0                             | 1.20            |
| 7     | 2        | 36.0                         | 1.7                             | 1.19            |
| 8     | 3        | 53.2                         | 2.1                             | 1.19            |
| 9     | 4        | 63.3                         | 2.5                             | 1.19            |
| 10    | 5        | 72.5                         | 2.7                             | 1.21            |

<sup>a</sup> $n_{\text{BnOH}} = 10.8 \mu\text{mol}$  (1 eq.), 7-is/BnOH/TBD = 25/1/2,  $c_M = 0.27\text{M}$ ; <sup>b</sup>determined by <sup>1</sup>H NMR; <sup>c</sup>apparent number-average molecular weights ( $M_n$ ) and dispersities ( $\mathcal{D}$ ) determined by SEC-ELS with PS calibration in THF at 25 °C

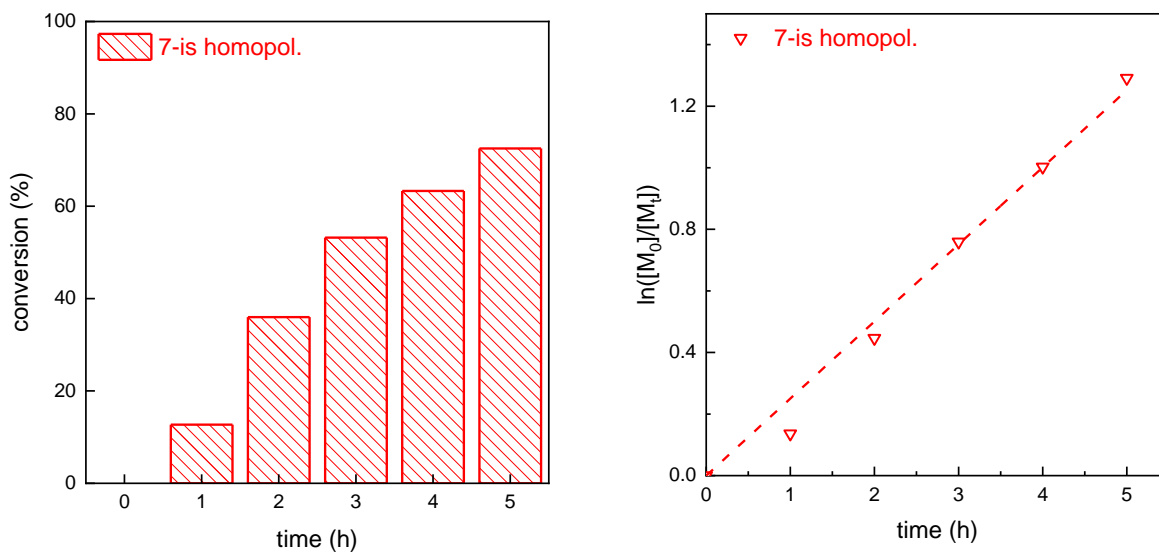

**Figure S9.** Kinetic plots of 7-(prop-2-ynyl)oxepan-2-one homopolymerization (in toluene catalyzed by BnOH/TBD at 30 °C)

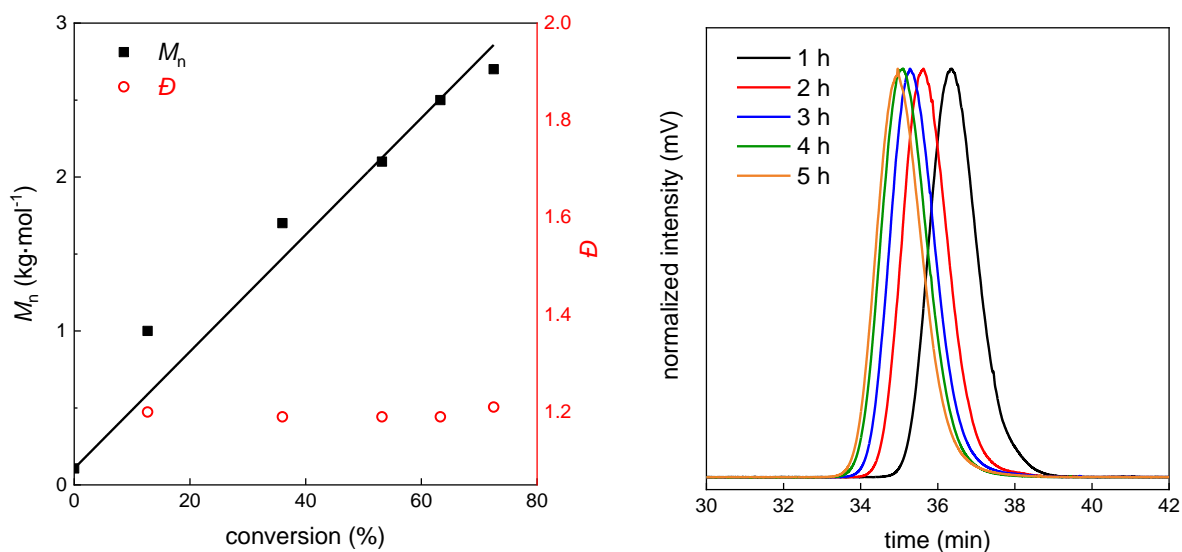

**Figure S10.** Kinetics of 7-(prop-2-ynyl)oxepan-2-one homopolymerization in toluene catalyzed by BnOH/TBD at 30 °C: The apparent number-average molecular weights ( $M_n$ ) and dispersities ( $\bar{D}$ ) determined by SEC-ELS with PS calibration plotted vs. monomer conversion (left). Corresponding SEC-ELS chromatograms (right).

**Table S6.** Polymerization of 3-(prop-2-ynyl)oxepan-2-one in toluene catalyzed by BnOH/TBD at 30 °C<sup>a</sup>

| entry | time (h) | conv. 3-is. <sup>b</sup> (%) | $M_n^c$ (kg.mol <sup>-1</sup> ) | $\bar{D}^c$ |
|-------|----------|------------------------------|---------------------------------|-------------|
| 11    | 1        | 32.0                         | 1.0                             | 1.27        |
| 12    | 2        | 50.7                         | 1.4                             | 1.31        |
| 13    | 3        | 68.7                         | 1.7                             | 1.36        |
| 14    | 4        | 71.9                         | 1.9                             | 1.36        |
| 15    | 5        | 83.1                         | 1.6                             | 1.50        |

<sup>a</sup> $n_{\text{BnOH}} = 4.3 \mu\text{mol}$  (1 eq.), 3-is/BnOH/TBD = 25/1/2,  $c_M = 0.27\text{M}$ ; <sup>b</sup>determined by <sup>1</sup>H NMR; <sup>c</sup>apparent number-average molecular weights ( $M_n$ ) and dispersities ( $\bar{D}$ ) determined by SEC-ELS with PS calibration in THF at 25 °C

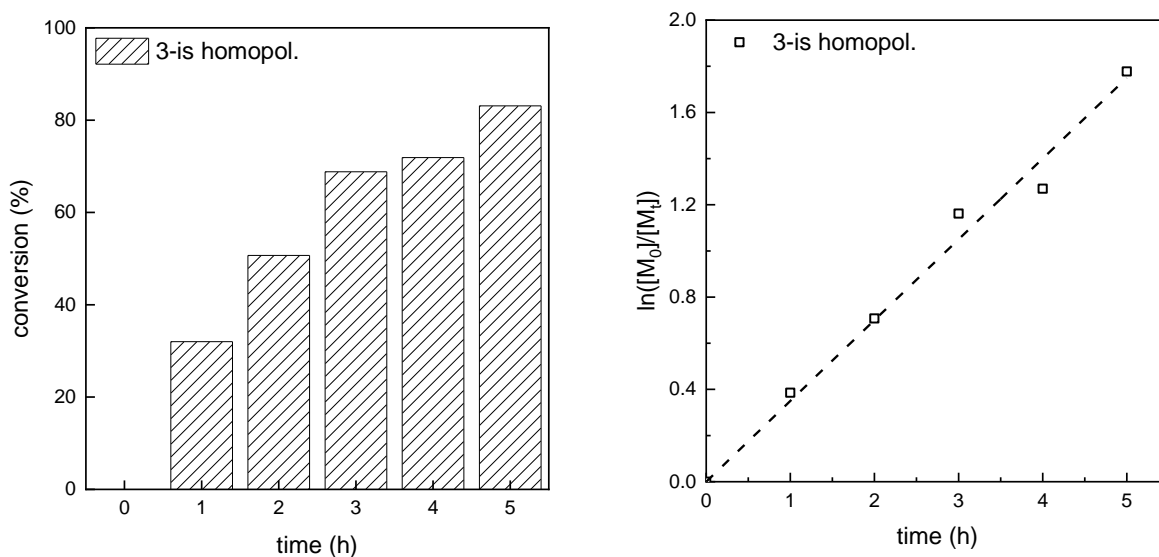

**Figure S11.** Kinetic plots of 3-(prop-2-ynyl)oxepan-2-one homopolymerization (in toluene catalyzed by BnOH/TBD at 30 °C)



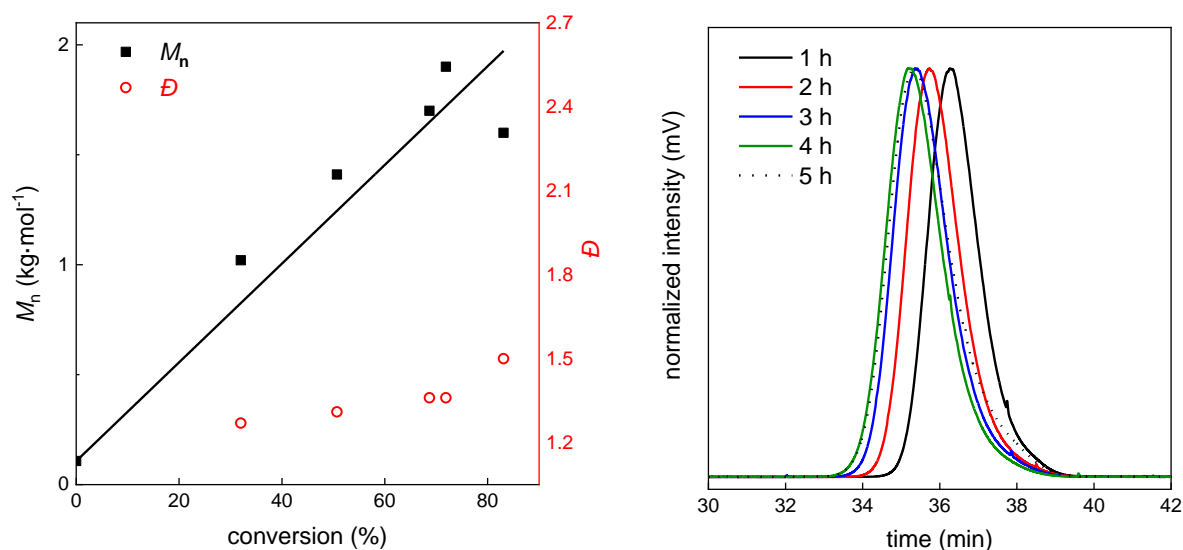

**Figure S12.** Kinetics of 3-(prop-2-ynyl)oxepan-2-one homopolymerization in toluene catalyzed by BnOH/TBD at 30 °C: The apparent number-average molecular weights ( $M_n$ ) and dispersities ( $\bar{D}$ ) determined by SEC-ELS with PS calibration plotted vs. monomer conversion (left). Corresponding SEC-ELS chromatograms (right).

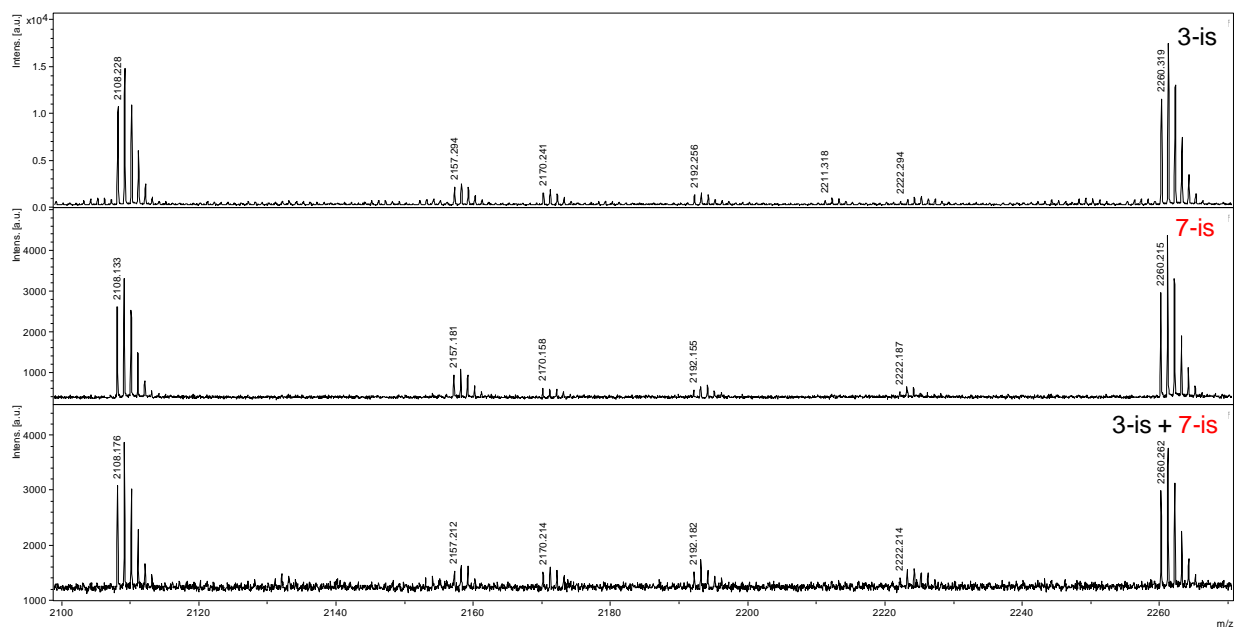

**Figure S13:** High resolution MALDI-TOF MS spectra of (co)polymers obtained after 4 hours of (co)polymerization during kinetic measurements

## Copolymerization parameters

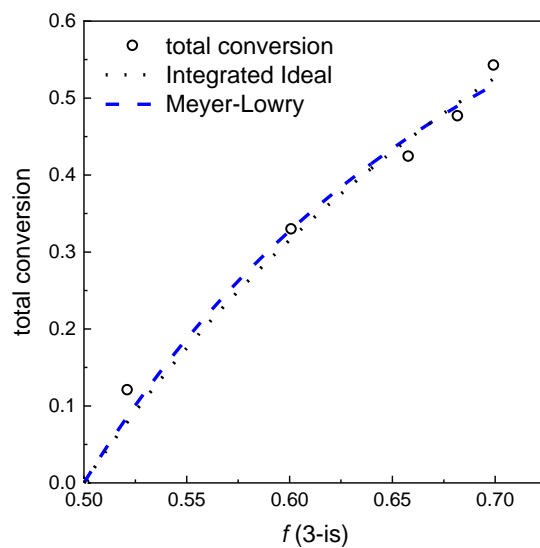

**Figure S14.** Overlay of the Integrated Ideal Model (black) and the Meyer-Lowry evaluation (blue) for the copolymerization of 3- and 7-(prop-2-ynyl)oxepan-2-one in toluene catalyzed by BnOH/TBD at 30 °C

**Table S7.** Data of the determined copolymerization parameters (Integrated Ideal Model<sup>18</sup>) used to construct simulated copolymer composition profiles

| $f(3\text{-is})$ | total conversion <sup>a</sup> | $F(3\text{-is})$ <sup>b</sup> | $f(3\text{-is})$ | total conversion <sup>a</sup> | $F(3\text{-is})$ <sup>b</sup> |
|------------------|-------------------------------|-------------------------------|------------------|-------------------------------|-------------------------------|
| 0.500            | 0.000                         | 0.248                         | 0.775            | 0.649                         | 0.532                         |
| 0.525            | 0.093                         | 0.267                         | 0.800            | 0.684                         | 0.569                         |
| 0.550            | 0.176                         | 0.287                         | 0.825            | 0.718                         | 0.609                         |
| 0.575            | 0.251                         | 0.309                         | 0.850            | 0.750                         | 0.652                         |
| 0.600            | 0.318                         | 0.331                         | 0.875            | 0.781                         | 0.698                         |
| 0.625            | 0.378                         | 0.355                         | 0.900            | 0.812                         | 0.748                         |
| 0.650            | 0.433                         | 0.380                         | 0.925            | 0.843                         | 0.803                         |
| 0.675            | 0.483                         | 0.407                         | 0.950            | 0.877                         | 0.862                         |
| 0.700            | 0.529                         | 0.435                         | 0.975            | 0.916                         | 0.928                         |
| 0.725            | 0.572                         | 0.465                         | 1.000            | 1.000                         | 1.000                         |
| 0.750            | 0.612                         | 0.497                         |                  |                               |                               |

$$^a \text{ total conversion} = 1 - \left(\frac{f}{f_0}\right)^{\frac{1}{r-1}} \cdot \left(\frac{1-f}{1-f_0}\right)^{\frac{r}{1-r}}, (f_0 = 0.5)$$

$$^b F = \frac{rf}{rf-f+1}$$

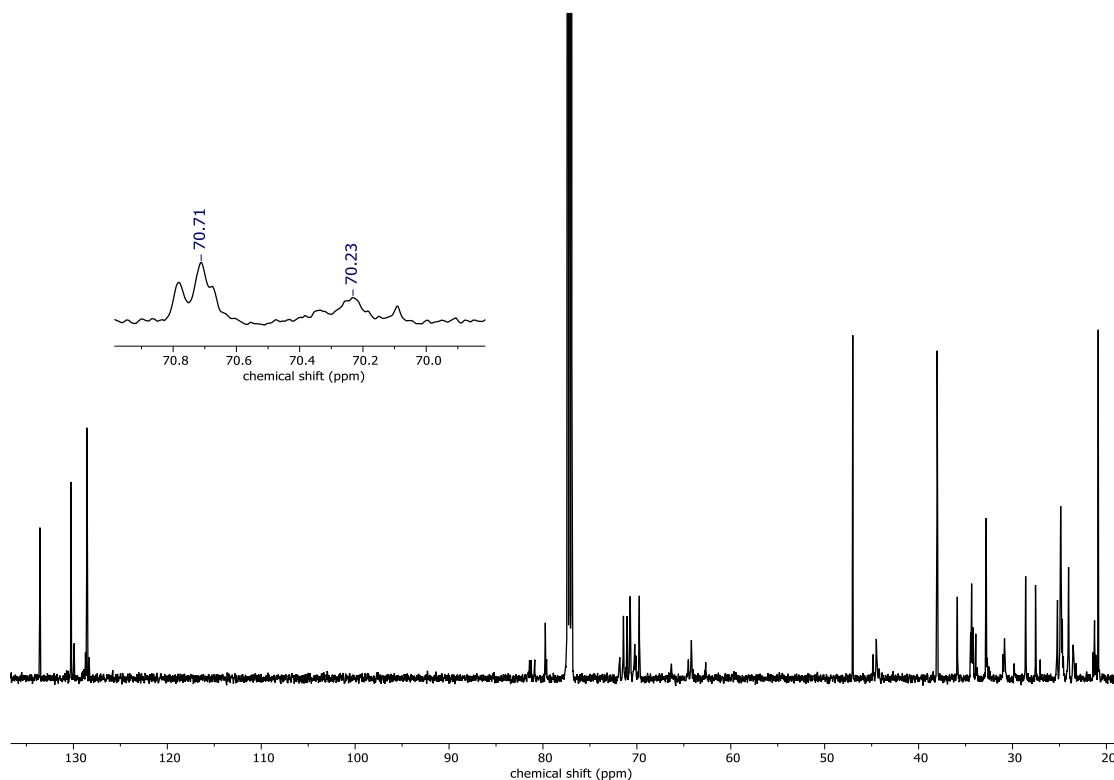

**Figure S15.**  $^{13}\text{C}$  NMR spectrum of copolymer obtained after 4 hours showing the higher content of 7-isomer dyads (70.71 ppm) than 3-isomer dyads (70.23 ppm)

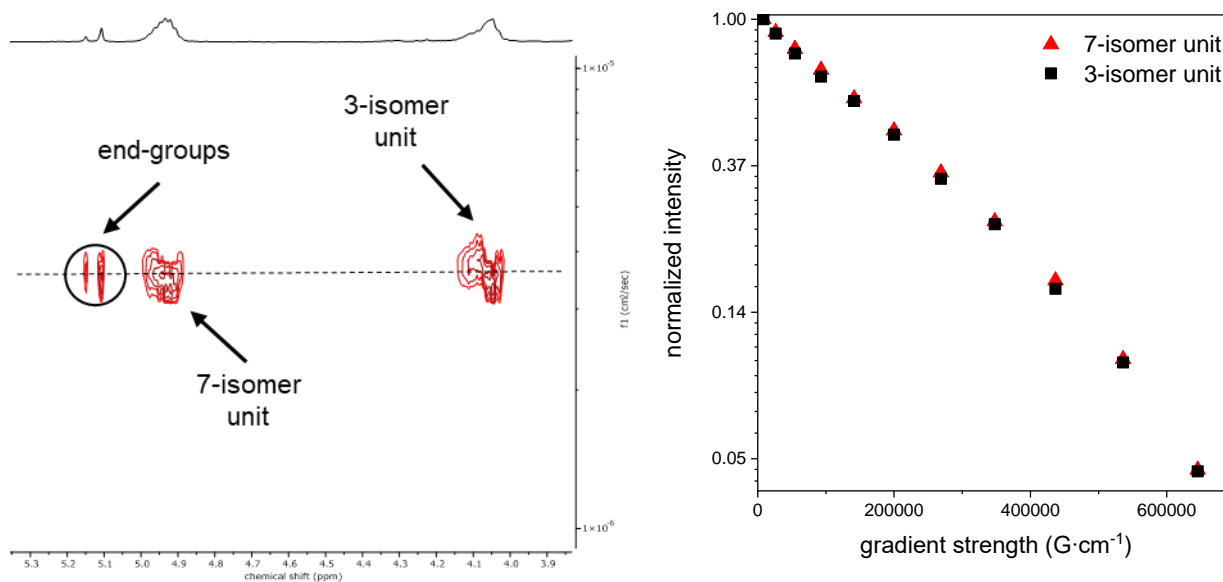

**Figure S16.** Representative DOSY NMR spectrum of copolymer obtained after 4 hours (left). Experimental signal intensity decay of 3- and 7-isomer characteristic peaks (right).

**Table S8:** Cartesian coordinates (in Angstroms) of all intermediates and transition states of the initial step of the TBD catalyzed ROP of 3-/7-isomer (**Scheme 3**) optimized in vacuum and toluene using the (PCM)B3LYP/6-311G(d) method

39 atoms  
 complex BnO-TBD in vacuum

|   |           |           |           |
|---|-----------|-----------|-----------|
| N | -3.241467 | 0.563143  | 0.190145  |
| C | -1.998784 | 0.003327  | -0.020043 |
| N | -1.946517 | -1.367762 | -0.145904 |
| C | -3.119525 | -2.160628 | -0.454968 |
| C | -4.255264 | -1.689893 | 0.444854  |
| C | -4.487622 | -0.200415 | 0.219037  |
| C | -2.196368 | 2.728578  | -0.374120 |
| C | -0.915255 | 2.095487  | 0.167159  |
| N | -0.880107 | 0.663219  | -0.069861 |
| C | -3.400262 | 2.017324  | 0.233253  |
| H | -2.881710 | -3.210250 | -0.267729 |
| H | -3.417030 | -2.078313 | -1.513158 |
| H | -3.980603 | -1.875185 | 1.487316  |
| H | -5.178528 | -2.237925 | 0.237310  |
| H | -5.032534 | -0.046343 | -0.725312 |
| H | -5.121627 | 0.207917  | 1.014998  |
| H | -4.313270 | 2.276294  | -0.315818 |
| H | -3.553460 | 2.340114  | 1.272755  |
| H | -2.215512 | 2.621284  | -1.463764 |
| H | -2.246122 | 3.797885  | -0.147075 |
| H | -0.825789 | 2.310374  | 1.243866  |
| H | -0.037156 | 2.543775  | -0.305724 |
| H | -1.034403 | -1.706653 | -0.434929 |
| O | 0.957556  | -1.235363 | -0.771667 |
| C | 1.872263  | -1.470210 | 0.280752  |
| C | 3.162800  | -0.675918 | 0.167688  |
| H | 2.109790  | -2.540237 | 0.255359  |
| H | 1.407699  | -1.270102 | 1.256859  |
| C | 3.608331  | -0.210695 | -1.071240 |
| C | 3.946542  | -0.432011 | 1.299087  |
| C | 4.812625  | 0.482629  | -1.176503 |
| H | 2.993092  | -0.390773 | -1.945525 |
| C | 5.153348  | 0.255989  | 1.196408  |
| H | 3.606883  | -0.778357 | 2.272468  |
| H | 5.144536  | 0.841072  | -2.146473 |
| C | 5.590987  | 0.716297  | -0.044447 |
| H | 5.748323  | 0.440104  | 2.086015  |
| H | 6.528670  | 1.257244  | -0.126712 |
| H | 0.472038  | -0.388379 | -0.583552 |

23 atoms

3-isomer in vacuum

|   |           |           |           |
|---|-----------|-----------|-----------|
| O | -0.297327 | 2.409772  | 0.513662  |
| C | -0.566583 | 1.331103  | 0.055163  |
| O | -1.851252 | 1.086777  | -0.304139 |
| C | -2.291386 | -0.161647 | -0.876237 |
| H | -1.709372 | -0.388153 | -1.776278 |
| H | -3.311245 | 0.058389  | -1.190932 |
| C | -2.277957 | -1.322672 | 0.111957  |
| H | -2.714992 | -0.971321 | 1.053592  |
| H | -2.953476 | -2.096395 | -0.270966 |
| C | -0.896525 | -1.939778 | 0.351692  |
| H | -0.545559 | -2.400609 | -0.580699 |
| H | -0.991500 | -2.757611 | 1.073626  |
| C | 0.175992  | -0.964490 | 0.847908  |
| H | -0.092243 | -0.569101 | 1.834991  |
| H | 1.108083  | -1.519828 | 0.982175  |
| C | 0.465812  | 0.215854  | -0.111625 |
| H | 0.420258  | -0.158606 | -1.141237 |
| C | 1.876279  | 0.808420  | 0.110632  |
| H | 1.984008  | 1.719253  | -0.484157 |
| C | 2.942333  | -0.129435 | -0.229471 |
| H | 1.973643  | 1.128147  | 1.152637  |
| C | 3.810416  | -0.909164 | -0.519108 |
| H | 4.590739  | -1.585706 | -0.774398 |

62 atoms

3-isomer, structure I1 in vacuum

|   |          |           |           |
|---|----------|-----------|-----------|
| N | 4.301753 | 1.785642  | 0.140116  |
| C | 3.169400 | 1.002352  | 0.046441  |
| N | 1.970761 | 1.633804  | 0.246130  |
| C | 1.825437 | 3.077730  | 0.239423  |
| C | 2.963553 | 3.665515  | 1.062461  |
| C | 4.291741 | 3.211033  | 0.469072  |
| C | 5.500473 | -0.062978 | -0.974194 |
| C | 4.457211 | -0.949169 | -0.297065 |
| N | 3.172627 | -0.278039 | -0.188134 |
| C | 5.616935 | 1.242122  | -0.196536 |
| H | 0.848762 | 3.314796  | 0.658994  |
| H | 1.853018 | 3.487261  | -0.783627 |
| H | 2.870635 | 3.319581  | 2.096102  |
| H | 2.923067 | 4.758304  | 1.069863  |
| H | 4.514057 | 3.793223  | -0.438373 |
| H | 5.110961 | 3.404972  | 1.172376  |
| H | 6.155464 | 1.993444  | -0.787075 |

|   |           |           |           |
|---|-----------|-----------|-----------|
| H | 6.197890  | 1.088933  | 0.724336  |
| H | 5.181851  | 0.143166  | -2.001320 |
| H | 6.478110  | -0.552206 | -1.023196 |
| H | 4.825317  | -1.252329 | 0.696549  |
| H | 4.311709  | -1.873228 | -0.863988 |
| H | 1.144745  | 1.072270  | 0.100363  |
| O | -1.500531 | 2.895334  | 0.821610  |
| C | -2.014694 | 1.944761  | 0.282487  |
| O | -1.217968 | 0.961291  | -0.185287 |
| C | -1.723326 | -0.235674 | -0.848363 |
| H | -2.443399 | -0.732595 | -0.190964 |
| H | -0.837604 | -0.865997 | -0.916120 |
| C | -2.310536 | 0.052281  | -2.222657 |
| H | -1.623139 | 0.718475  | -2.756970 |
| H | -2.313033 | -0.891243 | -2.779585 |
| C | -3.728936 | 0.630884  | -2.209769 |
| H | -4.414658 | -0.118492 | -1.794089 |
| H | -4.058467 | 0.800369  | -3.240384 |
| C | -3.894545 | 1.933620  | -1.420052 |
| H | -3.308970 | 2.738939  | -1.880140 |
| H | -4.941517 | 2.242689  | -1.480429 |
| C | -3.524115 | 1.829457  | 0.080901  |
| H | -3.855413 | 0.852190  | 0.450040  |
| C | -4.225219 | 2.917076  | 0.927178  |
| H | -3.828754 | 2.895642  | 1.945806  |
| C | -5.675874 | 2.755693  | 0.963122  |
| H | -3.966105 | 3.904733  | 0.533542  |
| C | -6.868610 | 2.607809  | 0.990437  |
| H | -7.924922 | 2.486554  | 1.026816  |
| O | 1.017529  | -1.931523 | -0.497493 |
| C | 0.820535  | -2.558625 | 0.750743  |
| C | -0.023661 | -3.806096 | 0.605484  |
| H | 0.335450  | -1.878991 | 1.469891  |
| H | 1.788810  | -2.833962 | 1.196815  |
| C | -0.115005 | -4.472707 | -0.618326 |
| C | -0.703198 | -4.330998 | 1.709351  |
| C | -0.865445 | -5.641928 | -0.733394 |
| H | 0.402586  | -4.056444 | -1.474184 |
| C | -1.448941 | -5.501709 | 1.597988  |
| H | -0.649475 | -3.817469 | 2.666491  |
| H | -0.928393 | -6.148326 | -1.692162 |
| C | -1.532877 | -6.162607 | 0.373181  |
| H | -1.970143 | -5.895104 | 2.465639  |
| H | -2.117137 | -7.073144 | 0.282531  |
| H | 1.788646  | -1.303713 | -0.418454 |

62 atoms

3-isomer, structure TS12 in vacuum

|   |           |           |           |
|---|-----------|-----------|-----------|
| N | 3.539018  | -1.604023 | -0.035473 |
| C | 2.236957  | -1.232483 | -0.195187 |
| N | 1.434925  | -1.930345 | -1.001348 |
| C | 1.842944  | -3.177815 | -1.621248 |
| C | 3.311974  | -3.084993 | -2.012559 |
| C | 4.134190  | -2.715700 | -0.783554 |
| C | 3.666151  | -0.123879 | 1.946150  |
| C | 2.597894  | 0.707208  | 1.248466  |
| N | 1.757108  | -0.164926 | 0.442786  |
| C | 4.436642  | -0.924129 | 0.903534  |
| H | 1.205832  | -3.335083 | -2.492860 |
| H | 1.678374  | -4.025912 | -0.942193 |
| H | 3.431692  | -2.321581 | -2.786985 |
| H | 3.672264  | -4.032674 | -2.420769 |
| H | 4.238210  | -3.583181 | -0.117743 |
| H | 5.145657  | -2.416497 | -1.077813 |
| H | 5.053778  | -1.688746 | 1.386910  |
| H | 5.117411  | -0.269147 | 0.343275  |
| H | 3.191423  | -0.802110 | 2.661700  |
| H | 4.358544  | 0.514273  | 2.501033  |
| H | 3.056506  | 1.486947  | 0.627433  |
| H | 1.950237  | 1.214213  | 1.963569  |
| H | 0.423616  | -1.655826 | -1.080568 |
| O | -1.156278 | -1.251896 | -1.294457 |
| C | -1.646210 | -0.859888 | -0.212124 |
| O | -1.183561 | -1.569047 | 0.899220  |
| C | -1.586892 | -1.179370 | 2.217474  |
| H | -1.749868 | -0.100467 | 2.249525  |
| H | -0.729564 | -1.403919 | 2.858999  |
| C | -2.805977 | -1.968911 | 2.679943  |
| H | -2.595613 | -3.033530 | 2.522486  |
| H | -2.927675 | -1.831216 | 3.762225  |
| C | -4.103711 | -1.580448 | 1.965208  |
| H | -4.417217 | -0.582929 | 2.300265  |
| H | -4.899769 | -2.265806 | 2.278963  |
| C | -4.028703 | -1.574993 | 0.431717  |
| H | -3.690422 | -2.550256 | 0.062323  |
| H | -5.045392 | -1.436431 | 0.051193  |
| C | -3.144236 | -0.460640 | -0.175561 |
| H | -3.255667 | 0.441070  | 0.430676  |
| C | -3.610736 | -0.135792 | -1.616481 |
| H | -2.880673 | 0.507590  | -2.109154 |
| C | -4.925040 | 0.500537  | -1.665884 |
| H | -3.619361 | -1.060759 | -2.201241 |
| C | -6.003499 | 1.033056  | -1.696999 |



|   |           |          |           |
|---|-----------|----------|-----------|
| H | -6.954834 | 1.506977 | -1.733789 |
| O | -0.801305 | 0.726679 | 0.237887  |
| C | -0.831979 | 1.710520 | -0.757385 |
| C | 0.125982  | 2.848395 | -0.446351 |
| H | -1.844641 | 2.142030 | -0.848357 |
| H | -0.580750 | 1.288865 | -1.744845 |
| C | 0.087544  | 3.476052 | 0.805088  |
| C | 1.058530  | 3.297556 | -1.384274 |
| C | 0.949735  | 4.526586 | 1.105105  |
| H | -0.627143 | 3.125944 | 1.542848  |
| C | 1.926041  | 4.350764 | -1.089230 |
| H | 1.105970  | 2.817906 | -2.358379 |
| H | 0.898577  | 5.007349 | 2.077875  |
| C | 1.874672  | 4.968936 | 0.157455  |
| H | 2.640956  | 4.687465 | -1.834495 |
| H | 2.545441  | 5.790659 | 0.389419  |
| H | 0.742260  | 0.110525 | 0.335702  |

62 atoms

3-isomer, structure I2 in vacuum

|   |           |           |           |
|---|-----------|-----------|-----------|
| N | 3.737652  | -1.491780 | -0.023222 |
| C | 2.391541  | -1.192187 | -0.098775 |
| N | 1.558890  | -1.737965 | -0.937189 |
| C | 2.052352  | -2.793592 | -1.804724 |
| C | 3.490287  | -2.533374 | -2.248533 |
| C | 4.367022  | -2.364814 | -1.013569 |
| C | 3.935104  | -0.222786 | 2.100745  |
| C | 2.769192  | 0.600748  | 1.569032  |
| N | 1.910356  | -0.276164 | 0.799165  |
| C | 4.658673  | -0.873215 | 0.927978  |
| H | 1.390490  | -2.860937 | -2.673057 |
| H | 1.994729  | -3.770602 | -1.298939 |
| H | 3.518714  | -1.619252 | -2.850997 |
| H | 3.877051  | -3.348662 | -2.867643 |
| H | 4.580413  | -3.342670 | -0.558672 |
| H | 5.334546  | -1.927421 | -1.288680 |
| H | 5.346946  | -1.646716 | 1.289345  |
| H | 5.275354  | -0.123872 | 0.407379  |
| H | 3.550318  | -0.990721 | 2.778278  |
| H | 4.637221  | 0.400573  | 2.661636  |
| H | 3.141258  | 1.447729  | 0.972081  |
| H | 2.179249  | 1.021624  | 2.385838  |
| H | -0.135536 | -1.494946 | -0.967569 |
| O | -1.122500 | -1.323082 | -1.102959 |
| C | -1.636612 | -0.678011 | -0.023824 |
| O | -1.274084 | -1.402912 | 1.122585  |

|   |           |           |           |
|---|-----------|-----------|-----------|
| C | -1.717160 | -0.937626 | 2.403234  |
| H | -1.906784 | 0.138918  | 2.373278  |
| H | -0.878400 | -1.104457 | 3.084357  |
| C | -2.940590 | -1.720752 | 2.859968  |
| H | -2.685936 | -2.786311 | 2.830439  |
| H | -3.149947 | -1.476982 | 3.909410  |
| C | -4.187195 | -1.460947 | 2.008822  |
| H | -4.562853 | -0.448407 | 2.208377  |
| H | -4.981715 | -2.142159 | 2.333745  |
| C | -3.992782 | -1.621777 | 0.492470  |
| H | -3.535065 | -2.590472 | 0.266074  |
| H | -4.985754 | -1.631019 | 0.032893  |
| C | -3.178900 | -0.504332 | -0.195509 |
| H | -3.449841 | 0.449770  | 0.268674  |
| C | -3.569326 | -0.431167 | -1.697326 |
| H | -2.861971 | 0.182790  | -2.256400 |
| C | -4.917878 | 0.091162  | -1.906309 |
| H | -3.483089 | -1.431611 | -2.130527 |
| C | -6.023372 | 0.536810  | -2.067820 |
| H | -7.000946 | 0.926811  | -2.221334 |
| O | -0.975149 | 0.612895  | 0.188627  |
| C | -1.000173 | 1.552043  | -0.889915 |
| C | -0.069965 | 2.692869  | -0.559986 |
| H | -2.019132 | 1.935332  | -1.027855 |
| H | -0.689620 | 1.059129  | -1.815183 |
| C | -0.379051 | 3.581021  | 0.476134  |
| C | 1.115255  | 2.880649  | -1.273980 |
| C | 0.474881  | 4.634689  | 0.787797  |
| H | -1.297485 | 3.443313  | 1.038800  |
| C | 1.971121  | 3.938970  | -0.969153 |
| H | 1.370380  | 2.192266  | -2.074195 |
| H | 0.219537  | 5.318524  | 1.591359  |
| C | 1.652797  | 4.818021  | 0.062956  |
| H | 2.884593  | 4.076685  | -1.539440 |
| H | 2.315747  | 5.644121  | 0.300400  |
| H | 0.941772  | -0.008622 | 0.662561  |

62 atoms

3-isomer, structure TS23 in vacuum

|   |          |           |           |
|---|----------|-----------|-----------|
| N | 3.737314 | -1.455242 | -0.255076 |
| C | 2.376817 | -1.229061 | -0.210202 |
| N | 1.561602 | -1.399747 | -1.210623 |
| C | 2.096103 | -1.956248 | -2.442170 |
| C | 3.516275 | -1.464650 | -2.715600 |
| C | 4.397025 | -1.794252 | -1.516051 |
| C | 3.899162 | -1.179338 | 2.209301  |

|   |           |           |           |
|---|-----------|-----------|-----------|
| C | 2.675216  | -0.284217 | 2.058696  |
| N | 1.857591  | -0.821051 | 0.990129  |
| C | 4.637577  | -1.243897 | 0.877354  |
| H | 1.429438  | -1.674751 | -3.262230 |
| H | 2.088554  | -3.057094 | -2.405112 |
| H | 3.496408  | -0.381279 | -2.874661 |
| H | 3.935515  | -1.921358 | -3.617304 |
| H | 4.661534  | -2.861176 | -1.516196 |
| H | 5.339374  | -1.235866 | -1.569245 |
| H | 5.369037  | -2.060684 | 0.890079  |
| H | 5.208195  | -0.315222 | 0.721391  |
| H | 3.572902  | -2.179762 | 2.508013  |
| H | 4.574780  | -0.800662 | 2.981400  |
| H | 2.982102  | 0.755309  | 1.865268  |
| H | 2.079348  | -0.277861 | 2.973847  |
| H | -0.162410 | -1.196168 | -1.154167 |
| O | -1.151479 | -1.032780 | -1.249915 |
| C | -1.674726 | -0.560649 | -0.085333 |
| O | -1.253531 | -1.424252 | 0.951436  |
| C | -1.750785 | -1.196781 | 2.277791  |
| H | -2.026484 | -0.146355 | 2.405107  |
| H | -0.910152 | -1.398981 | 2.947870  |
| C | -2.905388 | -2.141206 | 2.584159  |
| H | -2.559247 | -3.162747 | 2.390029  |
| H | -3.135817 | -2.086149 | 3.655758  |
| C | -4.168849 | -1.855725 | 1.767148  |
| H | -4.635809 | -0.929217 | 2.126775  |
| H | -4.897869 | -2.650882 | 1.959769  |
| C | -3.956162 | -1.738743 | 0.249671  |
| H | -3.423216 | -2.615593 | -0.132568 |
| H | -4.943539 | -1.744039 | -0.221606 |
| C | -3.226153 | -0.459876 | -0.215304 |
| H | -3.546483 | 0.371264  | 0.421490  |
| C | -3.641332 | -0.125718 | -1.674085 |
| H | -2.995404 | 0.644127  | -2.098511 |
| C | -5.029909 | 0.317031  | -1.779760 |
| H | -3.481163 | -1.011193 | -2.295349 |
| C | -6.169306 | 0.694976  | -1.854858 |
| H | -7.176816 | 1.027072  | -1.931968 |
| O | -1.081538 | 0.702325  | 0.307885  |
| C | -1.117208 | 1.782470  | -0.627267 |
| C | -0.069951 | 2.793673  | -0.234023 |
| H | -2.108553 | 2.252794  | -0.629741 |
| H | -0.912666 | 1.397903  | -1.630577 |
| C | -0.414678 | 3.962049  | 0.447391  |
| C | 1.276284  | 2.560585  | -0.535612 |
| C | 0.561583  | 4.886451  | 0.817406  |

|   |           |           |           |
|---|-----------|-----------|-----------|
| H | -1.456531 | 4.151446  | 0.690172  |
| C | 2.253727  | 3.481293  | -0.168940 |
| H | 1.549708  | 1.650052  | -1.060377 |
| H | 0.277351  | 5.792334  | 1.343770  |
| C | 1.898276  | 4.648055  | 0.508990  |
| H | 3.293872  | 3.294641  | -0.418870 |
| H | 2.659804  | 5.368490  | 0.791068  |
| H | 0.869483  | -0.605793 | 0.968191  |

62 atoms

3-isomer, structure I3 in vacuum

|   |           |           |           |
|---|-----------|-----------|-----------|
| N | 4.083296  | -0.772998 | -0.562211 |
| C | 2.710363  | -0.874979 | -0.492290 |
| N | 1.874691  | -0.135629 | -1.163065 |
| C | 2.411046  | 0.830594  | -2.106836 |
| C | 3.729208  | 1.428840  | -1.620037 |
| C | 4.712777  | 0.301424  | -1.330319 |
| C | 4.335711  | -2.894340 | 0.698814  |
| C | 2.989593  | -2.540798 | 1.318142  |
| N | 2.196546  | -1.853964 | 0.319473  |
| C | 5.002427  | -1.619783 | 0.195445  |
| H | 1.666958  | 1.618949  | -2.250734 |
| H | 2.560354  | 0.364398  | -3.093502 |
| H | 3.545841  | 2.005107  | -0.707353 |
| H | 4.157859  | 2.112100  | -2.359333 |
| H | 5.118887  | -0.105232 | -2.267381 |
| H | 5.565692  | 0.677440  | -0.753014 |
| H | 5.850581  | -1.868497 | -0.453126 |
| H | 5.412710  | -1.050596 | 1.043949  |
| H | 4.173586  | -3.587708 | -0.131541 |
| H | 4.988538  | -3.385603 | 1.425613  |
| H | 3.141641  | -1.932155 | 2.224635  |
| H | 2.450998  | -3.441720 | 1.621538  |
| H | 0.198752  | -0.485218 | -1.214608 |
| O | -0.782707 | -0.693740 | -1.332772 |
| C | -1.442717 | -0.660946 | -0.144377 |
| O | -0.751547 | -1.526189 | 0.750779  |
| C | -1.272102 | -1.682874 | 2.080343  |
| H | -1.875763 | -0.813356 | 2.348109  |
| H | -0.405005 | -1.690272 | 2.747167  |
| C | -2.047281 | -2.989122 | 2.187735  |
| H | -1.383176 | -3.802878 | 1.872815  |
| H | -2.289397 | -3.174556 | 3.241888  |
| C | -3.330323 | -3.015601 | 1.349684  |
| H | -4.082807 | -2.365011 | 1.814306  |
| H | -3.749035 | -4.027596 | 1.386063  |

|   |           |           |           |
|---|-----------|-----------|-----------|
| C | -3.169878 | -2.600803 | -0.122615 |
| H | -2.367680 | -3.173683 | -0.599414 |
| H | -4.095127 | -2.870451 | -0.640548 |
| C | -2.929608 | -1.094052 | -0.355773 |
| H | -3.525041 | -0.536615 | 0.374639  |
| C | -3.425674 | -0.691265 | -1.770590 |
| H | -3.097501 | 0.318471  | -2.023019 |
| C | -4.879338 | -0.758926 | -1.902896 |
| H | -2.950367 | -1.342216 | -2.509587 |
| C | -6.077485 | -0.803550 | -1.998530 |
| H | -7.136179 | -0.842214 | -2.093323 |
| O | -1.355286 | 0.615882  | 0.508416  |
| C | -1.732342 | 1.774516  | -0.223493 |
| C | -1.061442 | 2.986832  | 0.379979  |
| H | -2.822329 | 1.908281  | -0.208773 |
| H | -1.421726 | 1.660553  | -1.268326 |
| C | -1.747727 | 4.197647  | 0.488755  |
| C | 0.270248  | 2.923374  | 0.803009  |
| C | -1.116234 | 5.331484  | 0.998450  |
| H | -2.787063 | 4.256630  | 0.176521  |
| C | 0.899432  | 4.053023  | 1.318810  |
| H | 0.798613  | 1.979333  | 0.730453  |
| H | -1.664710 | 6.265019  | 1.078289  |
| C | 0.210134  | 5.261883  | 1.416131  |
| H | 1.932059  | 3.990513  | 1.649442  |
| H | 0.702318  | 6.141116  | 1.820147  |
| H | 1.189376  | -1.807286 | 0.442009  |

62 atoms

3-isomer, structure TSr in vacuum

|   |          |           |           |
|---|----------|-----------|-----------|
| N | 3.577624 | -1.555975 | -0.741693 |
| C | 2.220922 | -1.347831 | -0.625257 |
| N | 1.558255 | -0.407205 | -1.231842 |
| C | 2.275506 | 0.475208  | -2.137508 |
| C | 3.706833 | 0.726683  | -1.669267 |
| C | 4.413383 | -0.610517 | -1.483058 |
| C | 3.375754 | -3.730815 | 0.434770  |
| C | 2.164169 | -3.106400 | 1.114456  |
| N | 1.516249 | -2.225489 | 0.163263  |
| C | 4.300897 | -2.621447 | -0.050742 |
| H | 1.728363 | 1.419834  | -2.200409 |
| H | 2.285924 | 0.054938  | -3.155386 |
| H | 3.680454 | 1.270178  | -0.719815 |
| H | 4.260761 | 1.340193  | -2.386147 |
| H | 4.684757 | -1.043501 | -2.456292 |
| H | 5.347310 | -0.474571 | -0.925336 |

|   |           |           |           |
|---|-----------|-----------|-----------|
| H | 5.049485  | -3.028963 | -0.740216 |
| H | 4.856166  | -2.196976 | 0.799974  |
| H | 3.035707  | -4.335427 | -0.410984 |
| H | 3.919626  | -4.386271 | 1.120502  |
| H | 2.478068  | -2.579292 | 2.030522  |
| H | 1.446147  | -3.873714 | 1.413888  |
| H | -0.115655 | -0.294927 | -1.186454 |
| O | -1.124771 | -0.205628 | -1.272216 |
| C | -1.748093 | -0.077598 | -0.075290 |
| O | -1.149990 | -1.019427 | 0.816717  |
| C | -1.767116 | -1.244626 | 2.091842  |
| H | -2.324373 | -0.357727 | 2.402820  |
| H | -0.947085 | -1.372863 | 2.804143  |
| C | -2.632679 | -2.500260 | 2.047900  |
| H | -2.004444 | -3.322358 | 1.684231  |
| H | -2.925173 | -2.764439 | 3.072101  |
| C | -3.885966 | -2.380793 | 1.171053  |
| H | -4.627600 | -1.754345 | 1.683208  |
| H | -4.344035 | -3.372336 | 1.082542  |
| C | -3.661340 | -1.804171 | -0.237067 |
| H | -2.904860 | -2.380459 | -0.779740 |
| H | -4.596903 | -1.917992 | -0.792538 |
| C | -3.273248 | -0.312787 | -0.240610 |
| H | -3.754388 | 0.177189  | 0.610564  |
| C | -3.769617 | 0.411531  | -1.516285 |
| H | -3.376887 | 1.432330  | -1.537511 |
| C | -5.226071 | 0.471593  | -1.611833 |
| H | -3.355818 | -0.088829 | -2.395932 |
| C | -6.425723 | 0.524284  | -1.678767 |
| H | -7.485952 | 0.575939  | -1.745925 |
| O | -1.564269 | 1.208547  | 0.559391  |
| C | -1.097531 | 2.322403  | -0.184187 |
| C | 0.105522  | 2.974009  | 0.468510  |
| H | -1.907870 | 3.058960  | -0.259996 |
| H | -0.845453 | 2.006555  | -1.200136 |
| C | 0.394168  | 4.316199  | 0.202962  |
| C | 0.953537  | 2.258336  | 1.315105  |
| C | 1.514164  | 4.929166  | 0.759199  |
| H | -0.266546 | 4.890718  | -0.441894 |
| C | 2.071287  | 2.872014  | 1.878390  |
| H | 0.724456  | 1.221734  | 1.528878  |
| H | 1.721569  | 5.972994  | 0.543945  |
| C | 2.358033  | 4.207510  | 1.601832  |
| H | 2.718380  | 2.305033  | 2.541381  |
| H | 3.226402  | 4.684980  | 2.045143  |
| H | 0.566069  | -1.923962 | 0.354740  |

62 atoms

3-isomer, structure I3r in vacuum

|   |           |           |           |
|---|-----------|-----------|-----------|
| N | 4.365022  | 0.062539  | -0.394384 |
| C | 3.029423  | -0.270205 | -0.322035 |
| N | 2.142273  | 0.009147  | -1.232047 |
| C | 2.593903  | 0.650765  | -2.455495 |
| C | 3.731964  | 1.634595  | -2.190557 |
| C | 4.866499  | 0.904790  | -1.480919 |
| C | 4.862491  | -1.384818 | 1.558710  |
| C | 3.424535  | -1.104471 | 1.977432  |
| N | 2.620470  | -0.977673 | 0.779483  |
| C | 5.342213  | -0.266096 | 0.641592  |
| H | 1.741321  | 1.163709  | -2.909371 |
| H | 2.922105  | -0.102712 | -3.188548 |
| H | 3.362821  | 2.448709  | -1.557944 |
| H | 4.103582  | 2.080942  | -3.117805 |
| H | 5.430906  | 0.286927  | -2.193438 |
| H | 5.575987  | 1.624073  | -1.054882 |
| H | 6.277276  | -0.557138 | 0.148927  |
| H | 5.567000  | 0.634213  | 1.234185  |
| H | 4.898994  | -2.343709 | 1.033675  |
| H | 5.521616  | -1.451516 | 2.428641  |
| H | 3.385803  | -0.200168 | 2.606532  |
| H | 3.024239  | -1.928332 | 2.573077  |
| H | 0.525615  | -0.590230 | -1.213856 |
| O | -0.401384 | -0.954820 | -1.357774 |
| C | -1.206144 | -0.871826 | -0.260310 |
| O | -0.367969 | -1.126756 | 0.880737  |
| C | -1.001778 | -1.338470 | 2.148883  |
| H | -1.960322 | -0.813267 | 2.180269  |
| H | -0.353189 | -0.866288 | 2.892833  |
| C | -1.139185 | -2.831028 | 2.435616  |
| H | -0.145163 | -3.281345 | 2.326601  |
| H | -1.425216 | -2.963496 | 3.486766  |
| C | -2.141138 | -3.565810 | 1.535570  |
| H | -3.162012 | -3.298349 | 1.837232  |
| H | -2.048679 | -4.642029 | 1.720043  |
| C | -2.000975 | -3.301292 | 0.026933  |
| H | -0.985573 | -3.524542 | -0.316756 |
| H | -2.665781 | -3.996558 | -0.493788 |
| C | -2.381482 | -1.868959 | -0.389337 |
| H | -3.172582 | -1.507848 | 0.274085  |
| C | -2.940749 | -1.800892 | -1.831867 |
| H | -3.065897 | -0.751714 | -2.113458 |
| C | -4.216951 | -2.494634 | -1.983079 |
| H | -2.202859 | -2.216449 | -2.523200 |

|   |           |           |           |
|---|-----------|-----------|-----------|
| C | -5.270930 | -3.063253 | -2.095479 |
| H | -6.204122 | -3.561275 | -2.206373 |
| O | -1.823507 | 0.399522  | -0.093221 |
| C | -0.963451 | 1.526493  | -0.203669 |
| C | -1.686299 | 2.778079  | 0.236425  |
| H | -0.632290 | 1.631033  | -1.243834 |
| H | -0.066079 | 1.378088  | 0.406163  |
| C | -0.949293 | 3.945454  | 0.463713  |
| C | -3.072368 | 2.817493  | 0.395567  |
| C | -1.581875 | 5.127473  | 0.836716  |
| H | 0.131918  | 3.927992  | 0.349335  |
| C | -3.707177 | 4.000443  | 0.773306  |
| H | -3.648382 | 1.916082  | 0.227732  |
| H | -0.993533 | 6.023411  | 1.010309  |
| C | -2.967136 | 5.158959  | 0.993587  |
| H | -4.786079 | 4.014243  | 0.894910  |
| H | -3.463210 | 6.078642  | 1.287526  |
| H | 1.615743  | -1.109509 | 0.837282  |

62 atoms

3-isomer, structure TSr2 in vacuum

|   |           |           |           |
|---|-----------|-----------|-----------|
| N | 4.471153  | 0.738897  | -0.364831 |
| C | 3.185587  | 0.273578  | -0.189328 |
| N | 2.451766  | -0.257887 | -1.120438 |
| C | 3.040206  | -0.444946 | -2.436237 |
| C | 3.999581  | 0.690328  | -2.789654 |
| C | 5.062230  | 0.803832  | -1.702325 |
| C | 4.742677  | 1.005313  | 2.089510  |
| C | 3.229952  | 1.190422  | 2.110037  |
| N | 2.661556  | 0.348472  | 1.077490  |
| C | 5.269747  | 1.343496  | 0.699595  |
| H | 2.229088  | -0.504317 | -3.166969 |
| H | 3.572433  | -1.407720 | -2.487992 |
| H | 3.435697  | 1.626662  | -2.855468 |
| H | 4.480265  | 0.526480  | -3.758811 |
| H | 5.810223  | 0.005981  | -1.811115 |
| H | 5.599758  | 1.755354  | -1.791719 |
| H | 6.303630  | 0.994540  | 0.593082  |
| H | 5.292558  | 2.435977  | 0.564325  |
| H | 4.975515  | -0.034067 | 2.338358  |
| H | 5.230066  | 1.646188  | 2.829430  |
| H | 2.978439  | 2.254516  | 1.971467  |
| H | 2.812873  | 0.883934  | 3.072195  |
| H | 0.775743  | -0.578061 | -1.020562 |
| O | -0.196399 | -0.758039 | -1.211113 |
| C | -0.988132 | -0.896741 | -0.103860 |



|   |           |           |           |
|---|-----------|-----------|-----------|
| O | -0.137398 | -0.708787 | 1.036325  |
| C | -0.640287 | -1.074789 | 2.328676  |
| H | -1.728770 | -0.972811 | 2.351085  |
| H | -0.236608 | -0.334824 | 3.026219  |
| C | -0.170375 | -2.474938 | 2.712007  |
| H | 0.918416  | -2.499616 | 2.586804  |
| H | -0.364625 | -2.631852 | 3.780583  |
| C | -0.814304 | -3.607334 | 1.902227  |
| H | -1.852483 | -3.742836 | 2.231631  |
| H | -0.300015 | -4.544220 | 2.143939  |
| C | -0.815459 | -3.413151 | 0.377090  |
| H | 0.202555  | -3.256989 | 0.003567  |
| H | -1.172436 | -4.342666 | -0.075574 |
| C | -1.719021 | -2.262479 | -0.101575 |
| H | -2.572858 | -2.173387 | 0.576649  |
| C | -2.294885 | -2.515532 | -1.516566 |
| H | -2.813115 | -1.613463 | -1.853293 |
| C | -3.216795 | -3.646899 | -1.564747 |
| H | -1.469005 | -2.672933 | -2.215368 |
| C | -3.978837 | -4.577158 | -1.593055 |
| H | -4.656969 | -5.395686 | -1.629201 |
| O | -2.023073 | 0.072684  | -0.077292 |
| C | -1.609808 | 1.411630  | -0.318269 |
| C | -2.776449 | 2.357337  | -0.152367 |
| H | -1.195163 | 1.489190  | -1.328163 |
| H | -0.809955 | 1.683939  | 0.382128  |
| C | -2.575820 | 3.723857  | -0.379383 |
| C | -4.047733 | 1.918174  | 0.218140  |
| C | -3.620068 | 4.631582  | -0.236629 |
| H | -1.591214 | 4.080256  | -0.673137 |
| C | -5.096282 | 2.827575  | 0.360254  |
| H | -4.211088 | 0.861979  | 0.390704  |
| H | -3.445840 | 5.687921  | -0.417606 |
| C | -4.888271 | 4.185107  | 0.135145  |
| H | -6.080420 | 2.469443  | 0.647089  |
| H | -5.705580 | 4.890881  | 0.245559  |
| H | 1.687798  | 0.069384  | 1.129152  |

62 atoms

3-isomer, structure I3r2 in vacuum

|   |          |           |           |
|---|----------|-----------|-----------|
| N | 4.493247 | 1.065880  | -0.436678 |
| C | 3.194593 | 0.653620  | -0.233531 |
| N | 2.596066 | -0.283904 | -0.910384 |
| C | 3.364974 | -1.000667 | -1.914572 |
| C | 4.364054 | -0.084703 | -2.619256 |
| C | 5.264849 | 0.565335  | -1.575604 |

|   |           |           |           |
|---|-----------|-----------|-----------|
| C | 4.421113  | 2.424926  | 1.642673  |
| C | 2.923149  | 2.511032  | 1.376519  |
| N | 2.500020  | 1.258117  | 0.784063  |
| C | 5.143795  | 2.124296  | 0.334642  |
| H | 2.666433  | -1.431936 | -2.637017 |
| H | 3.900271  | -1.848803 | -1.459690 |
| H | 3.815264  | 0.687486  | -3.168172 |
| H | 4.974705  | -0.633072 | -3.342825 |
| H | 6.019748  | -0.149752 | -1.219870 |
| H | 5.810560  | 1.409130  | -2.014201 |
| H | 6.176937  | 1.816807  | 0.535177  |
| H | 5.201986  | 3.036737  | -0.278346 |
| H | 4.606922  | 1.628225  | 2.368747  |
| H | 4.803803  | 3.359065  | 2.062973  |
| H | 2.703139  | 3.375431  | 0.729687  |
| H | 2.367781  | 2.654828  | 2.305982  |
| H | 0.876281  | -0.319654 | -0.987944 |
| O | -0.115135 | -0.267162 | -1.144758 |
| C | -0.844401 | -0.607806 | -0.033978 |
| O | -0.257507 | 0.128483  | 1.057144  |
| C | -0.679858 | -0.175904 | 2.393586  |
| H | -1.709764 | -0.544634 | 2.386194  |
| H | -0.686276 | 0.779132  | 2.926582  |
| C | 0.285918  | -1.149625 | 3.063395  |
| H | 1.295566  | -0.736124 | 2.958617  |
| H | 0.069780  | -1.175095 | 4.139007  |
| C | 0.247545  | -2.575383 | 2.499876  |
| H | -0.674485 | -3.071068 | 2.830297  |
| H | 1.069760  | -3.147778 | 2.943983  |
| C | 0.331456  | -2.683892 | 0.968427  |
| H | 1.234589  | -2.189160 | 0.595149  |
| H | 0.431916  | -3.743927 | 0.717003  |
| C | -0.909803 | -2.135133 | 0.240019  |
| H | -1.788082 | -2.303619 | 0.870546  |
| C | -1.179246 | -2.863657 | -1.099760 |
| H | -1.978652 | -2.340223 | -1.630996 |
| C | -1.552342 | -4.264682 | -0.924425 |
| H | -0.293076 | -2.792432 | -1.737092 |
| C | -1.862679 | -5.416576 | -0.770777 |
| H | -2.143373 | -6.434675 | -0.644810 |
| O | -2.180274 | -0.209621 | -0.213762 |
| C | -2.370425 | 1.122912  | -0.683943 |
| C | -3.821860 | 1.519880  | -0.545877 |
| H | -2.053978 | 1.189385  | -1.729002 |
| H | -1.737219 | 1.807343  | -0.109139 |
| C | -4.211342 | 2.801146  | -0.953374 |
| C | -4.789951 | 0.655835  | -0.033400 |

|   |           |           |           |
|---|-----------|-----------|-----------|
| C | -5.536217 | 3.211421  | -0.848038 |
| H | -3.468399 | 3.484433  | -1.358103 |
| C | -6.119459 | 1.065884  | 0.071736  |
| H | -4.497478 | -0.338674 | 0.278797  |
| H | -5.819466 | 4.209344  | -1.168762 |
| C | -6.498257 | 2.342336  | -0.333129 |
| H | -6.861091 | 0.380679  | 0.471231  |
| H | -7.533190 | 2.659294  | -0.250824 |
| H | 1.523440  | 0.985481  | 0.841568  |

62 atoms

3-isomer, structure TS34 in vacuum

|   |           |           |           |
|---|-----------|-----------|-----------|
| N | -4.275586 | -1.205401 | -0.305032 |
| C | -3.012054 | -0.708972 | -0.192196 |
| N | -2.536111 | 0.124966  | -1.127104 |
| C | -3.323475 | 0.571080  | -2.263673 |
| C | -4.270698 | -0.543399 | -2.693098 |
| C | -5.103308 | -0.981711 | -1.493934 |
| C | -4.150866 | -1.854453 | 2.084501  |
| C | -2.653578 | -1.998026 | 1.831268  |
| N | -2.231657 | -1.031970 | 0.831929  |
| C | -4.898298 | -1.993694 | 0.763102  |
| H | -2.626911 | 0.834253  | -3.060666 |
| H | -3.890331 | 1.478103  | -2.014220 |
| H | -3.687777 | -1.387536 | -3.073303 |
| H | -4.934280 | -0.208900 | -3.494524 |
| H | -5.869836 | -0.229045 | -1.264599 |
| H | -5.629894 | -1.915959 | -1.715759 |
| H | -5.934142 | -1.654609 | 0.871890  |
| H | -4.937100 | -3.046783 | 0.453982  |
| H | -4.348622 | -0.873185 | 2.525970  |
| H | -4.509053 | -2.612253 | 2.786128  |
| H | -2.418341 | -3.021774 | 1.508988  |
| H | -2.077678 | -1.808891 | 2.738294  |
| H | -1.522445 | 0.339478  | -1.119514 |
| O | 0.132944  | 0.571848  | -1.332671 |
| C | 0.947151  | 0.878236  | -0.446652 |
| O | 0.006324  | 0.214690  | 1.162617  |
| C | 0.276894  | 0.711873  | 2.436042  |
| H | 1.354472  | 0.925538  | 2.550451  |
| H | 0.053322  | -0.054407 | 3.202756  |
| C | -0.537084 | 1.973173  | 2.762824  |
| H | -1.593781 | 1.741321  | 2.572727  |
| H | -0.457787 | 2.195881  | 3.836464  |
| C | -0.141044 | 3.228500  | 1.973439  |
| H | 0.821430  | 3.601398  | 2.347632  |

|   |           |           |           |
|---|-----------|-----------|-----------|
| H | -0.867402 | 4.019603  | 2.198251  |
| C | -0.037733 | 3.088679  | 0.443818  |
| H | -0.933580 | 2.610408  | 0.037479  |
| H | -0.012736 | 4.101712  | 0.029492  |
| C | 1.210644  | 2.332848  | -0.051819 |
| H | 1.976807  | 2.334264  | 0.726278  |
| C | 1.834614  | 3.003675  | -1.310906 |
| H | 2.649646  | 2.373776  | -1.681232 |
| C | 2.347072  | 4.347654  | -1.063823 |
| H | 1.079618  | 3.031009  | -2.103871 |
| C | 2.770815  | 5.452635  | -0.848479 |
| H | 3.153692  | 6.427277  | -0.662759 |
| O | 2.108261  | 0.161449  | -0.295530 |
| C | 2.036091  | -1.204265 | -0.707475 |
| C | 3.354027  | -1.884846 | -0.436525 |
| H | 1.776393  | -1.260019 | -1.767726 |
| H | 1.227683  | -1.678573 | -0.140728 |
| C | 3.785961  | -2.920260 | -1.269919 |
| C | 4.143669  | -1.534344 | 0.662568  |
| C | 4.972719  | -3.601597 | -1.007540 |
| H | 3.190203  | -3.193689 | -2.137046 |
| C | 5.334565  | -2.208146 | 0.921854  |
| H | 3.822418  | -0.721937 | 1.303533  |
| H | 5.293468  | -4.401745 | -1.667831 |
| C | 5.752466  | -3.246358 | 0.090710  |
| H | 5.939764  | -1.920273 | 1.776275  |
| H | 6.681593  | -3.769867 | 0.293860  |
| H | -1.276854 | -0.501329 | 0.964920  |

62 atoms

3-isomer, structure I4 in vacuum

|   |          |           |           |
|---|----------|-----------|-----------|
| N | 4.201035 | -0.267519 | -0.179511 |
| C | 2.825835 | -0.372847 | -0.154875 |
| N | 2.251462 | -1.209886 | -1.070342 |
| C | 2.991991 | -2.078174 | -1.961407 |
| C | 4.268112 | -1.367590 | -2.397916 |
| C | 5.046958 | -0.946151 | -1.158149 |
| C | 4.016816 | 0.741952  | 2.070448  |
| C | 2.674613 | 1.250863  | 1.545996  |
| N | 2.047723 | 0.281201  | 0.661714  |
| C | 4.923823 | 0.428551  | 0.886068  |
| H | 2.354249 | -2.308189 | -2.817423 |
| H | 3.243557 | -3.036253 | -1.480940 |
| H | 4.005598 | -0.487823 | -2.993280 |
| H | 4.890835 | -2.019228 | -3.017320 |
| H | 5.518353 | -1.826621 | -0.694406 |

|   |           |           |           |
|---|-----------|-----------|-----------|
| H | 5.860932  | -0.265292 | -1.434155 |
| H | 5.763880  | -0.202746 | 1.202305  |
| H | 5.358602  | 1.353404  | 0.481674  |
| H | 3.848022  | -0.164335 | 2.661264  |
| H | 4.504072  | 1.473737  | 2.722061  |
| H | 2.823275  | 2.212694  | 1.030061  |
| H | 1.988012  | 1.451801  | 2.372628  |
| H | 1.240545  | -1.185994 | -1.123306 |
| O | -0.691336 | -1.190460 | -1.398931 |
| C | -1.668465 | -0.748248 | -0.830072 |
| O | -0.470283 | -0.403912 | 1.616329  |
| C | -0.288924 | -1.473642 | 2.526244  |
| H | -1.047743 | -1.365798 | 3.310704  |
| H | 0.691789  | -1.385926 | 3.015733  |
| C | -0.397132 | -2.871030 | 1.903740  |
| H | 0.286945  | -2.937215 | 1.049663  |
| H | -0.011475 | -3.574460 | 2.654147  |
| C | -1.807063 | -3.350602 | 1.501205  |
| H | -2.534697 | -2.998379 | 2.244518  |
| H | -1.816717 | -4.443612 | 1.585555  |
| C | -2.334392 | -3.031790 | 0.089950  |
| H | -1.592998 | -3.327065 | -0.658534 |
| H | -3.204982 | -3.675309 | -0.068742 |
| C | -2.769136 | -1.582844 | -0.189558 |
| H | -3.038637 | -1.074422 | 0.738245  |
| C | -4.009469 | -1.516823 | -1.133278 |
| H | -4.209931 | -0.471980 | -1.386584 |
| C | -5.210493 | -2.103525 | -0.547681 |
| H | -3.775192 | -2.030100 | -2.073897 |
| C | -6.197044 | -2.582213 | -0.055076 |
| H | -7.074700 | -2.999627 | 0.377274  |
| O | -1.968367 | 0.554423  | -0.772853 |
| C | -0.968509 | 1.497976  | -1.237463 |
| C | -1.289389 | 2.842829  | -0.645854 |
| H | -0.984927 | 1.519405  | -2.329981 |
| H | 0.011256  | 1.145064  | -0.911389 |
| C | -1.356286 | 2.990794  | 0.745353  |
| C | -1.500455 | 3.955768  | -1.460022 |
| C | -1.629018 | 4.235349  | 1.303374  |
| H | -1.199667 | 2.122161  | 1.377713  |
| C | -1.765921 | 5.205355  | -0.899761 |
| H | -1.459311 | 3.847943  | -2.540549 |
| H | -1.682354 | 4.341094  | 2.382538  |
| C | -1.831890 | 5.346518  | 0.483201  |
| H | -1.928094 | 6.063659  | -1.544332 |
| H | -2.043066 | 6.316682  | 0.922218  |
| H | 0.405567  | -0.197108 | 1.200348  |

62 atoms

3-isomer, structure I5 in vacuum

|   |           |           |           |
|---|-----------|-----------|-----------|
| N | -6.255014 | -0.734718 | 0.492527  |
| C | -5.156697 | -0.293894 | -0.217897 |
| N | -4.848735 | 1.042183  | -0.117758 |
| C | -5.387923 | 1.900419  | 0.915632  |
| C | -6.876147 | 1.602405  | 1.051339  |
| C | -7.062368 | 0.121240  | 1.358901  |
| C | -5.417461 | -3.020940 | 0.080721  |
| C | -4.817201 | -2.417707 | -1.188906 |
| N | -4.421709 | -1.034771 | -0.993848 |
| C | -6.588430 | -2.158298 | 0.537380  |
| H | -5.222639 | 2.938633  | 0.618651  |
| H | -4.885900 | 1.756814  | 1.886712  |
| H | -7.375909 | 1.857894  | 0.112484  |
| H | -7.328683 | 2.199813  | 1.847763  |
| H | -6.808094 | -0.076673 | 2.412063  |
| H | -8.114649 | -0.160662 | 1.234116  |
| H | -6.869862 | -2.411265 | 1.566768  |
| H | -7.472281 | -2.348650 | -0.087982 |
| H | -4.649945 | -3.045226 | 0.861537  |
| H | -5.757190 | -4.048777 | -0.080016 |
| H | -5.544065 | -2.500452 | -2.012888 |
| H | -3.937613 | -2.987702 | -1.502015 |
| H | -3.984216 | 1.298035  | -0.584978 |
| O | 4.707977  | 1.631360  | -1.757516 |
| C | 4.199790  | 1.345699  | -0.699992 |
| O | -2.417954 | 0.698501  | -1.754880 |
| C | -1.191372 | 0.349334  | -1.136355 |
| H | -0.700891 | -0.468133 | -1.687684 |
| H | -1.357141 | -0.011129 | -0.108853 |
| C | -0.280555 | 1.568648  | -1.121387 |
| H | -0.177811 | 1.929696  | -2.150917 |
| H | -0.778266 | 2.370517  | -0.562752 |
| C | 1.099049  | 1.286990  | -0.519444 |
| H | 1.585368  | 0.485170  | -1.088102 |
| H | 0.986195  | 0.901716  | 0.502068  |
| C | 1.995867  | 2.529328  | -0.493202 |
| H | 2.142181  | 2.905407  | -1.512239 |
| H | 1.494457  | 3.326282  | 0.064945  |
| C | 3.380264  | 2.304263  | 0.149844  |
| H | 3.249635  | 1.858506  | 1.138943  |
| C | 4.173330  | 3.629107  | 0.291125  |
| H | 5.184717  | 3.411495  | 0.652750  |
| C | 3.545445  | 4.585077  | 1.197529  |

|   |           |           |           |
|---|-----------|-----------|-----------|
| H | 4.297663  | 4.073511  | -0.701171 |
| C | 3.029253  | 5.361788  | 1.955955  |
| H | 2.579437  | 6.058371  | 2.622286  |
| O | 4.285449  | 0.122702  | -0.137274 |
| C | 5.028407  | -0.872139 | -0.898233 |
| C | 5.029519  | -2.153248 | -0.115061 |
| H | 6.037427  | -0.489877 | -1.064278 |
| H | 4.552562  | -0.987818 | -1.873458 |
| C | 4.108898  | -3.164157 | -0.400978 |
| C | 5.943534  | -2.346485 | 0.925330  |
| C | 4.101543  | -4.347068 | 0.334879  |
| H | 3.393147  | -3.024596 | -1.205919 |
| C | 5.937923  | -3.525547 | 1.664529  |
| H | 6.662999  | -1.566394 | 1.156953  |
| H | 3.383023  | -5.125658 | 0.099636  |
| C | 5.016302  | -4.529361 | 1.369408  |
| H | 6.654327  | -3.663897 | 2.467969  |
| H | 5.013609  | -5.451066 | 1.942465  |
| H | -3.042982 | -0.065984 | -1.680637 |

23 atoms

7-isomer in vacuum

|   |           |           |           |
|---|-----------|-----------|-----------|
| O | -2.545691 | -1.851020 | -0.160074 |
| O | -0.449796 | -1.182862 | -0.256280 |
| C | -1.748339 | -0.996768 | 0.115407  |
| C | -2.124443 | 0.291654  | 0.827498  |
| H | -1.551181 | 0.395762  | 1.756302  |
| H | -3.169924 | 0.167286  | 1.108667  |
| C | -1.952593 | 1.555968  | -0.039195 |
| H | -2.365524 | 1.367116  | -1.036747 |
| H | -2.567380 | 2.349824  | 0.395949  |
| C | -0.509383 | 2.058238  | -0.148642 |
| H | -0.162514 | 2.362519  | 0.847426  |
| H | -0.494533 | 2.965820  | -0.761270 |
| C | 0.488781  | 1.051746  | -0.731315 |
| H | 0.223204  | 0.794638  | -1.763664 |
| H | 1.476764  | 1.520451  | -0.768647 |
| C | 0.611612  | -0.252403 | 0.058524  |
| H | 0.605753  | -0.051361 | 1.135384  |
| C | 1.888946  | -1.042156 | -0.278956 |
| H | 1.817273  | -2.021942 | 0.202449  |
| C | 3.109999  | -0.366682 | 0.145945  |
| H | 1.913497  | -1.229179 | -1.358181 |
| C | 4.108647  | 0.194894  | 0.508596  |
| H | 4.999101  | 0.683177  | 0.825993  |

62 atoms

7-isomer, structure I1 in vacuum

|   |           |           |           |
|---|-----------|-----------|-----------|
| O | -1.840999 | 1.105294  | -2.307489 |
| O | -2.529787 | 0.775785  | -0.251622 |
| C | -2.451240 | 0.391984  | -1.542808 |
| C | -3.174902 | -0.861491 | -1.984928 |
| H | -2.655393 | -1.721580 | -1.550281 |
| H | -3.031898 | -0.913778 | -3.064525 |
| C | -4.676054 | -0.902808 | -1.637333 |
| H | -5.138033 | 0.059983  | -1.886377 |
| H | -5.149289 | -1.640257 | -2.293458 |
| C | -4.986737 | -1.277042 | -0.183592 |
| H | -4.593747 | -2.282624 | 0.013506  |
| H | -6.072887 | -1.348163 | -0.059910 |
| C | -4.430513 | -0.313985 | 0.870628  |
| H | -4.895610 | 0.674781  | 0.774341  |
| H | -4.693212 | -0.688550 | 1.864813  |
| C | -2.915862 | -0.131694 | 0.817100  |
| H | -2.398966 | -1.079738 | 0.656220  |
| C | -2.328439 | 0.536035  | 2.072049  |
| H | -1.271505 | 0.738665  | 1.871594  |
| C | -2.464414 | -0.280676 | 3.272968  |
| H | -2.815688 | 1.506865  | 2.220006  |
| C | -2.575063 | -0.962888 | 4.256622  |
| H | -2.664742 | -1.562772 | 5.130511  |
| O | -0.218011 | -1.276432 | -0.522111 |
| C | 0.642315  | -1.826988 | -1.495664 |
| C | 1.731641  | -2.727382 | -0.934054 |
| H | 1.102631  | -1.036539 | -2.104407 |
| H | 0.015056  | -2.416349 | -2.175917 |
| C | 1.578767  | -3.347563 | 0.307869  |
| C | 2.890714  | -2.982637 | -1.673184 |
| C | 2.561524  | -4.205682 | 0.798924  |
| H | 0.684697  | -3.140925 | 0.885159  |
| C | 3.872812  | -3.842996 | -1.187531 |
| H | 3.028529  | -2.500190 | -2.638090 |
| H | 2.428098  | -4.678989 | 1.767269  |
| C | 3.710927  | -4.458641 | 0.052766  |
| H | 4.767903  | -4.027885 | -1.774023 |
| H | 4.476490  | -5.126522 | 0.435428  |
| H | 0.234230  | -0.490434 | -0.105186 |
| N | 2.344889  | 2.877754  | 0.431485  |
| C | 1.321332  | 2.023347  | 0.072176  |
| N | 0.458905  | 2.469058  | -0.887389 |
| C | 0.676621  | 3.660018  | -1.680469 |
| C | 1.245791  | 4.746133  | -0.776483 |



|   |           |           |           |
|---|-----------|-----------|-----------|
| C | 2.515754  | 4.220818  | -0.118895 |
| C | 3.433586  | 0.912304  | 1.461043  |
| C | 1.997693  | 0.450103  | 1.697514  |
| N | 1.121936  | 0.848023  | 0.605017  |
| C | 3.440793  | 2.425977  | 1.289996  |
| H | -0.283115 | 3.955403  | -2.108051 |
| H | 1.362072  | 3.474775  | -2.522595 |
| H | 0.504254  | 5.003455  | -0.014267 |
| H | 1.476077  | 5.653538  | -1.341950 |
| H | 3.339716  | 4.215810  | -0.849325 |
| H | 2.826142  | 4.885999  | 0.696093  |
| H | 4.386179  | 2.757865  | 0.842367  |
| H | 3.363075  | 2.922958  | 2.267443  |
| H | 3.817293  | 0.429067  | 0.557007  |
| H | 4.091911  | 0.631782  | 2.288880  |
| H | 1.636299  | 0.855572  | 2.656483  |
| H | 1.957824  | -0.638206 | 1.788137  |
| H | -0.306401 | 1.860484  | -1.149202 |

62 atoms

7-isomer, structure TS12 in vacuum

|   |           |           |           |
|---|-----------|-----------|-----------|
| O | 1.081019  | -0.749856 | -2.231721 |
| O | 2.071422  | -0.790400 | -0.246855 |
| C | 1.743305  | -0.087063 | -1.408559 |
| C | 2.803352  | 0.890684  | -1.922368 |
| H | 2.812739  | 1.806190  | -1.327279 |
| H | 2.484442  | 1.161187  | -2.929757 |
| C | 4.217683  | 0.281081  | -1.961411 |
| H | 4.163353  | -0.757163 | -2.307849 |
| H | 4.806451  | 0.821342  | -2.711017 |
| C | 4.962069  | 0.364376  | -0.620648 |
| H | 5.025482  | 1.420304  | -0.325774 |
| H | 5.996743  | 0.030317  | -0.761214 |
| C | 4.345221  | -0.436755 | 0.533006  |
| H | 4.450045  | -1.511923 | 0.341845  |
| H | 4.902547  | -0.222825 | 1.451343  |
| C | 2.858957  | -0.163457 | 0.774769  |
| H | 2.643356  | 0.907135  | 0.789294  |
| C | 2.349481  | -0.777598 | 2.093353  |
| H | 1.262814  | -0.655515 | 2.113001  |
| C | 2.934795  | -0.185328 | 3.291506  |
| H | 2.542280  | -1.856861 | 2.075396  |
| C | 3.411814  | 0.315954  | 4.274892  |
| H | 3.835971  | 0.757330  | 5.144775  |
| O | 0.543931  | 1.108105  | -0.574158 |
| C | -0.123975 | 1.913567  | -1.500041 |

|   |           |           |           |
|---|-----------|-----------|-----------|
| C | -1.180821 | 2.789754  | -0.847052 |
| H | -0.595446 | 1.310891  | -2.294683 |
| H | 0.587835  | 2.583605  | -2.016068 |
| C | -0.935549 | 3.386818  | 0.395261  |
| C | -2.404988 | 3.040963  | -1.473293 |
| C | -1.883291 | 4.218024  | 0.988292  |
| H | 0.007474  | 3.182785  | 0.890732  |
| C | -3.357030 | 3.873027  | -0.883923 |
| H | -2.615202 | 2.579049  | -2.434684 |
| H | -1.671730 | 4.678034  | 1.949434  |
| C | -3.099444 | 4.465310  | 0.350534  |
| H | -4.301643 | 4.055720  | -1.388187 |
| H | -3.838177 | 5.113793  | 0.811716  |
| H | -0.517941 | 0.029920  | 0.032704  |
| N | -2.590361 | -2.514146 | 0.451059  |
| C | -1.576202 | -1.763368 | -0.065040 |
| N | -0.886465 | -2.203400 | -1.118811 |
| C | -1.196110 | -3.447602 | -1.800443 |
| C | -1.704024 | -4.466649 | -0.788385 |
| C | -2.881155 | -3.868242 | -0.028150 |
| C | -3.411069 | -0.492245 | 1.619243  |
| C | -1.950777 | -0.061324 | 1.647918  |
| N | -1.263015 | -0.586118 | 0.477865  |
| C | -3.481202 | -2.009225 | 1.500830  |
| H | -0.281472 | -3.788371 | -2.288081 |
| H | -1.944032 | -3.287385 | -2.589265 |
| H | -0.898149 | -4.719179 | -0.092894 |
| H | -2.019068 | -5.389137 | -1.282642 |
| H | -3.775902 | -3.843393 | -0.665144 |
| H | -3.126637 | -4.484812 | 0.842965  |
| H | -4.499651 | -2.328204 | 1.254851  |
| H | -3.218765 | -2.482640 | 2.456548  |
| H | -3.908603 | -0.022675 | 0.765795  |
| H | -3.931789 | -0.171231 | 2.524865  |
| H | -1.469724 | -0.412338 | 2.571493  |
| H | -1.856155 | 1.024351  | 1.621327  |
| H | -0.089766 | -1.629652 | -1.494220 |

62 atoms

7-isomer, structure I2 in vacuum

|   |          |           |           |
|---|----------|-----------|-----------|
| O | 0.897725 | -0.855392 | -2.168141 |
| O | 1.848989 | -0.996364 | -0.144423 |
| C | 1.640419 | -0.165745 | -1.260451 |
| C | 2.938089 | 0.311056  | -1.935049 |
| H | 3.298638 | 1.218488  | -1.439772 |
| H | 2.672551 | 0.589030  | -2.956742 |

|   |           |           |           |
|---|-----------|-----------|-----------|
| C | 4.053000  | -0.746784 | -1.955992 |
| H | 3.619608  | -1.724631 | -2.187248 |
| H | 4.735288  | -0.510206 | -2.779584 |
| C | 4.877233  | -0.808824 | -0.659762 |
| H | 5.282738  | 0.191816  | -0.457804 |
| H | 5.747686  | -1.454750 | -0.821288 |
| C | 4.130627  | -1.307713 | 0.584187  |
| H | 3.907425  | -2.376362 | 0.481737  |
| H | 4.778937  | -1.200835 | 1.460281  |
| C | 2.803114  | -0.596115 | 0.848357  |
| H | 2.928844  | 0.490801  | 0.828817  |
| C | 2.169354  | -0.980841 | 2.199240  |
| H | 1.173268  | -0.530169 | 2.238294  |
| C | 2.948739  | -0.561017 | 3.359051  |
| H | 2.019073  | -2.066358 | 2.217453  |
| C | 3.590339  | -0.197562 | 4.308693  |
| H | 4.157036  | 0.116995  | 5.152173  |
| O | 0.889485  | 0.961636  | -0.707953 |
| C | 0.428101  | 1.928796  | -1.656861 |
| C | -0.409317 | 2.959120  | -0.939272 |
| H | -0.151385 | 1.432337  | -2.439758 |
| H | 1.286768  | 2.417407  | -2.135462 |
| C | 0.100566  | 3.640620  | 0.171856  |
| C | -1.700699 | 3.259987  | -1.376578 |
| C | -0.662151 | 4.604513  | 0.824707  |
| H | 1.098501  | 3.405819  | 0.527301  |
| C | -2.465268 | 4.230493  | -0.729271 |
| H | -2.114169 | 2.726927  | -2.227533 |
| H | -0.252538 | 5.125713  | 1.684483  |
| C | -1.947965 | 4.904926  | 0.373598  |
| H | -3.466160 | 4.454838  | -1.084843 |
| H | -2.541275 | 5.659837  | 0.879973  |
| H | -0.807977 | 0.129271  | 0.068282  |
| N | -3.211587 | -2.020908 | 0.389545  |
| C | -2.073372 | -1.438378 | -0.132380 |
| N | -1.360425 | -1.941480 | -1.096220 |
| C | -1.801558 | -3.185354 | -1.702264 |
| C | -2.454571 | -4.112738 | -0.679122 |
| C | -3.603169 | -3.374389 | -0.002530 |
| C | -3.773068 | 0.075496  | 1.586459  |
| C | -2.272292 | 0.333753  | 1.597770  |
| N | -1.703138 | -0.225015 | 0.388388  |
| C | -4.018977 | -1.421883 | 1.449550  |
| H | -0.933080 | -3.669761 | -2.157851 |
| H | -2.509394 | -2.988491 | -2.523607 |
| H | -1.708216 | -4.401243 | 0.068334  |
| H | -2.828111 | -5.030033 | -1.144582 |

|   |           |           |           |
|---|-----------|-----------|-----------|
| H | -4.475404 | -3.327010 | -0.670344 |
| H | -3.924398 | -3.911202 | 0.898370  |
| H | -5.074707 | -1.613233 | 1.222918  |
| H | -3.807465 | -1.925413 | 2.405910  |
| H | -4.220404 | 0.610184  | 0.743431  |
| H | -4.242494 | 0.441013  | 2.504032  |
| H | -1.825980 | -0.100060 | 2.507613  |
| H | -2.057051 | 1.404095  | 1.609146  |
| H | 0.087254  | -1.260514 | -1.723598 |

62 atoms

7-isomer, structure TS23 in vacuum

|   |           |           |           |
|---|-----------|-----------|-----------|
| O | 0.702198  | -0.407076 | -2.222313 |
| O | 1.788368  | -0.862458 | -0.299440 |
| C | 1.546461  | 0.125820  | -1.296178 |
| C | 2.811389  | 0.604935  | -2.025542 |
| H | 3.321541  | 1.357706  | -1.416621 |
| H | 2.460938  | 1.112887  | -2.926207 |
| C | 3.783459  | -0.520221 | -2.411071 |
| H | 3.210614  | -1.387714 | -2.752801 |
| H | 4.378103  | -0.187673 | -3.268697 |
| C | 4.750426  | -0.913770 | -1.285120 |
| H | 5.314532  | -0.021456 | -0.982145 |
| H | 5.493625  | -1.616412 | -1.678738 |
| C | 4.103268  | -1.539550 | -0.043915 |
| H | 3.709789  | -2.533898 | -0.285976 |
| H | 4.869749  | -1.679133 | 0.725415  |
| C | 2.944100  | -0.731663 | 0.544391  |
| H | 3.211244  | 0.324406  | 0.647548  |
| C | 2.505782  | -1.246845 | 1.929374  |
| H | 1.622136  | -0.678230 | 2.234901  |
| C | 3.532583  | -1.126747 | 2.958979  |
| H | 2.190843  | -2.292251 | 1.830896  |
| C | 4.375891  | -1.010971 | 3.807683  |
| H | 5.122141  | -0.912361 | 4.559409  |
| O | 0.941417  | 1.196154  | -0.543962 |
| C | 0.351685  | 2.241578  | -1.300927 |
| C | -0.449302 | 3.156577  | -0.402191 |
| H | -0.293520 | 1.815896  | -2.075797 |
| H | 1.128971  | 2.830420  | -1.810120 |
| C | -0.429967 | 3.036766  | 0.987400  |
| C | -1.223111 | 4.168997  | -0.980200 |
| C | -1.168714 | 3.912581  | 1.783237  |
| H | 0.165099  | 2.252763  | 1.437827  |
| C | -1.959671 | 5.043847  | -0.187860 |
| H | -1.251441 | 4.271482  | -2.062383 |

|   |           |           |           |
|---|-----------|-----------|-----------|
| H | -1.141768 | 3.807966  | 2.863888  |
| C | -1.934802 | 4.918574  | 1.201060  |
| H | -2.555432 | 5.822744  | -0.653983 |
| H | -2.508498 | 5.599844  | 1.821657  |
| H | -0.282885 | -0.950627 | 0.607288  |
| N | -3.331026 | -1.969441 | 0.264858  |
| C | -2.078132 | -1.523821 | -0.101221 |
| N | -1.666738 | -1.387904 | -1.325878 |
| C | -2.603727 | -1.665741 | -2.400946 |
| C | -3.545974 | -2.814013 | -2.044514 |
| C | -4.261577 | -2.482986 | -0.740171 |
| C | -2.930947 | -1.258309 | 2.605645  |
| C | -1.459198 | -1.507056 | 2.300378  |
| N | -1.222063 | -1.172277 | 0.911924  |
| C | -3.784206 | -2.081969 | 1.649069  |
| H | -2.030580 | -1.905630 | -3.300999 |
| H | -3.194191 | -0.767691 | -2.642490 |
| H | -2.961206 | -3.731875 | -1.923696 |
| H | -4.282119 | -2.992963 | -2.834130 |
| H | -5.057718 | -1.745425 | -0.915161 |
| H | -4.744630 | -3.378604 | -0.331197 |
| H | -4.828554 | -1.751123 | 1.695033  |
| H | -3.776458 | -3.139800 | 1.954836  |
| H | -3.144076 | -0.193065 | 2.479334  |
| H | -3.170802 | -1.531503 | 3.636951  |
| H | -1.198126 | -2.552802 | 2.530881  |
| H | -0.822928 | -0.872008 | 2.921065  |
| H | -0.125765 | -0.795549 | -1.800566 |

62 atoms

7-isomer, structure I3 in vacuum

|   |          |           |           |
|---|----------|-----------|-----------|
| O | 0.297662 | -0.112483 | -2.068415 |
| O | 0.789404 | -1.531851 | -0.389467 |
| C | 1.317745 | -0.543706 | -1.271365 |
| C | 2.441690 | -1.095271 | -2.169988 |
| H | 3.402665 | -0.979544 | -1.658860 |
| H | 2.472733 | -0.450797 | -3.051041 |
| C | 2.254987 | -2.560535 | -2.594896 |
| H | 1.204128 | -2.735935 | -2.845166 |
| H | 2.821554 | -2.726257 | -3.517659 |
| C | 2.745723 | -3.579651 | -1.551902 |
| H | 3.797302 | -3.360527 | -1.323621 |
| H | 2.741657 | -4.579446 | -2.000698 |
| C | 1.952898 | -3.637800 | -0.238307 |
| H | 0.966365 | -4.083100 | -0.417124 |
| H | 2.472794 | -4.294285 | 0.467273  |

|   |           |           |           |
|---|-----------|-----------|-----------|
| C | 1.724484  | -2.274243 | 0.412945  |
| H | 2.657944  | -1.711589 | 0.489830  |
| C | 1.112833  | -2.357445 | 1.824353  |
| H | 0.868213  | -1.338950 | 2.139321  |
| C | 1.990746  | -2.985533 | 2.806005  |
| H | 0.165382  | -2.907570 | 1.772488  |
| C | 2.726138  | -3.495816 | 3.608415  |
| H | 3.373830  | -3.943806 | 4.323522  |
| O | 1.795766  | 0.474146  | -0.385551 |
| C | 2.276382  | 1.669468  | -0.992869 |
| C | 2.167158  | 2.812751  | -0.011472 |
| H | 1.678735  | 1.883785  | -1.886038 |
| H | 3.320538  | 1.548559  | -1.310650 |
| C | 1.041675  | 2.938311  | 0.809615  |
| C | 3.169292  | 3.781922  | 0.063552  |
| C | 0.924320  | 4.016670  | 1.682212  |
| H | 0.268249  | 2.179878  | 0.761102  |
| C | 3.049302  | 4.866060  | 0.931962  |
| H | 4.055451  | 3.688328  | -0.558863 |
| H | 0.048213  | 4.100686  | 2.318390  |
| C | 1.925547  | 4.985854  | 1.745264  |
| H | 3.838855  | 5.609795  | 0.979715  |
| H | 1.832491  | 5.824747  | 2.428047  |
| H | -1.213096 | -1.373215 | 0.018995  |
| N | -4.036986 | 0.202032  | 0.127070  |
| C | -2.704390 | -0.025138 | -0.142775 |
| N | -1.917050 | 0.805742  | -0.760735 |
| C | -2.453396 | 2.099894  | -1.148795 |
| C | -3.920992 | 2.001230  | -1.561239 |
| C | -4.717341 | 1.375800  | -0.422019 |
| C | -4.118097 | -1.807600 | 1.586548  |
| C | -2.998011 | -2.331635 | 0.696017  |
| N | -2.171340 | -1.207173 | 0.307700  |
| C | -4.903659 | -0.745487 | 0.825957  |
| H | -1.848807 | 2.487055  | -1.973558 |
| H | -2.348769 | 2.825267  | -0.327163 |
| H | -3.999896 | 1.374549  | -2.455674 |
| H | -4.338442 | 2.982231  | -1.807583 |
| H | -4.884893 | 2.110166  | 0.378416  |
| H | -5.706896 | 1.061550  | -0.774711 |
| H | -5.543450 | -0.181976 | 1.515590  |
| H | -5.575327 | -1.227238 | 0.098836  |
| H | -3.678624 | -1.377891 | 2.491245  |
| H | -4.793720 | -2.612176 | 1.889780  |
| H | -3.421218 | -2.861314 | -0.172655 |
| H | -2.373256 | -3.047141 | 1.235631  |
| H | -0.475920 | 0.224853  | -1.521211 |

62 atoms

7-isomer, structure TSr in vacuum

|   |           |           |           |
|---|-----------|-----------|-----------|
| O | 0.182482  | -0.214194 | -2.217424 |
| O | 0.952800  | -1.192564 | -0.347713 |
| C | 1.334383  | -0.533935 | -1.565108 |
| C | 2.194408  | -1.433466 | -2.468569 |
| H | 3.246263  | -1.286163 | -2.210157 |
| H | 2.064490  | -1.039830 | -3.479698 |
| C | 1.841102  | -2.926946 | -2.418520 |
| H | 0.752909  | -3.047039 | -2.398958 |
| H | 2.181997  | -3.395301 | -3.348380 |
| C | 2.495596  | -3.679105 | -1.246044 |
| H | 3.580965  | -3.522506 | -1.300875 |
| H | 2.344068  | -4.756113 | -1.381827 |
| C | 2.010564  | -3.299119 | 0.160957  |
| H | 0.989502  | -3.670611 | 0.316453  |
| H | 2.641333  | -3.796945 | 0.904649  |
| C | 1.997532  | -1.794902 | 0.435082  |
| H | 2.954292  | -1.339228 | 0.169462  |
| C | 1.698032  | -1.430907 | 1.902283  |
| H | 1.625743  | -0.341047 | 1.963406  |
| C | 2.702098  | -1.913962 | 2.844420  |
| H | 0.711677  | -1.824150 | 2.176342  |
| C | 3.539839  | -2.307516 | 3.611582  |
| H | 4.279958  | -2.649250 | 4.294925  |
| O | 2.142811  | 0.588378  | -1.178015 |
| C | 1.799280  | 1.916883  | -1.571675 |
| C | 1.731003  | 2.835058  | -0.371943 |
| H | 0.848928  | 1.905821  | -2.107552 |
| H | 2.567746  | 2.273859  | -2.266952 |
| C | 0.758070  | 2.641555  | 0.616969  |
| C | 2.634568  | 3.888519  | -0.227072 |
| C | 0.695004  | 3.487311  | 1.720215  |
| H | 0.045442  | 1.829499  | 0.510100  |
| C | 2.571275  | 4.740309  | 0.876201  |
| H | 3.400203  | 4.043703  | -0.982515 |
| H | -0.065568 | 3.327561  | 2.478838  |
| C | 1.601528  | 4.540419  | 1.853874  |
| H | 3.283655  | 5.553956  | 0.973017  |
| H | 1.551083  | 5.198423  | 2.715948  |
| H | -0.977572 | -1.342929 | 0.189096  |
| N | -3.949431 | -0.077080 | 0.310260  |
| C | -2.615791 | -0.190679 | -0.013763 |
| N | -1.954213 | 0.648668  | -0.758253 |
| C | -2.649274 | 1.832429  | -1.238941 |

|   |           |           |           |
|---|-----------|-----------|-----------|
| C | -4.115743 | 1.538825  | -1.549863 |
| C | -4.781199 | 0.956161  | -0.308755 |
| C | -3.735452 | -1.917089 | 1.968021  |
| C | -2.608271 | -2.412403 | 1.069940  |
| N | -1.933008 | -1.254374 | 0.519668  |
| C | -4.670230 | -1.030946 | 1.152516  |
| H | -2.134720 | 2.191601  | -2.134604 |
| H | -2.582693 | 2.646279  | -0.500798 |
| H | -4.170184 | 0.817991  | -2.372220 |
| H | -4.649527 | 2.440358  | -1.865244 |
| H | -4.987853 | 1.747992  | 0.424801  |
| H | -5.746427 | 0.505419  | -0.568103 |
| H | -5.333927 | -0.467183 | 1.818757  |
| H | -5.318801 | -1.655143 | 0.519112  |
| H | -3.303808 | -1.349438 | 2.797328  |
| H | -4.302146 | -2.751369 | 2.390471  |
| H | -3.011363 | -3.073777 | 0.286407  |
| H | -1.881248 | -2.995111 | 1.640222  |
| H | -0.542508 | 0.108256  | -1.598793 |

62 atoms

7-isomer, structure I3r in vacuum

|   |           |           |           |
|---|-----------|-----------|-----------|
| O | -0.178689 | 0.015081  | -2.171796 |
| O | 0.250803  | -1.279986 | -0.382386 |
| C | 0.825065  | -0.692916 | -1.572825 |
| C | 1.365284  | -1.735798 | -2.558744 |
| H | 2.409451  | -1.948835 | -2.314337 |
| H | 1.367673  | -1.237954 | -3.530394 |
| C | 0.556205  | -3.038229 | -2.619563 |
| H | -0.513562 | -2.806696 | -2.589972 |
| H | 0.737625  | -3.510814 | -3.590865 |
| C | 0.926505  | -4.053387 | -1.524913 |
| H | 2.006328  | -4.243795 | -1.582008 |
| H | 0.443959  | -5.012130 | -1.746798 |
| C | 0.567810  | -3.657043 | -0.085797 |
| H | -0.520777 | -3.691298 | 0.049983  |
| H | 0.992718  | -4.392456 | 0.605039  |
| C | 1.035518  | -2.258094 | 0.318315  |
| H | 2.091397  | -2.111496 | 0.074875  |
| C | 0.852341  | -1.959993 | 1.820155  |
| H | 1.132926  | -0.916547 | 1.992562  |
| C | 1.636730  | -2.827265 | 2.692820  |
| H | -0.211349 | -2.039356 | 2.074086  |
| C | 2.294743  | -3.538912 | 3.403817  |
| H | 2.878068  | -4.163309 | 4.037433  |
| O | 1.942791  | 0.092935  | -1.193146 |



|   |           |           |           |
|---|-----------|-----------|-----------|
| C | 1.646009  | 1.331717  | -0.554305 |
| C | 2.906604  | 1.917671  | 0.034800  |
| H | 0.891829  | 1.190493  | 0.226179  |
| H | 1.220038  | 2.022238  | -1.292337 |
| C | 2.816721  | 2.823787  | 1.095882  |
| C | 4.167624  | 1.611984  | -0.482946 |
| C | 3.959413  | 3.419185  | 1.624512  |
| H | 1.842964  | 3.064027  | 1.515169  |
| C | 5.312301  | 2.201949  | 0.049131  |
| H | 4.244541  | 0.901928  | -1.297460 |
| H | 3.870902  | 4.118514  | 2.450342  |
| C | 5.213464  | 3.109179  | 1.101966  |
| H | 6.285813  | 1.950810  | -0.361056 |
| H | 6.106470  | 3.567121  | 1.515721  |
| H | -1.658242 | -0.881431 | 0.154991  |
| N | -4.070882 | 1.247520  | 0.462598  |
| C | -2.842385 | 0.744296  | 0.092743  |
| N | -1.948848 | 1.389369  | -0.598513 |
| C | -2.230685 | 2.767849  | -0.963376 |
| C | -3.714031 | 2.981801  | -1.260176 |
| C | -4.532447 | 2.537173  | -0.053633 |
| C | -4.462173 | -0.707350 | 1.947079  |
| C | -3.546436 | -1.451869 | 0.982856  |
| N | -2.533983 | -0.523302 | 0.521587  |
| C | -5.062218 | 0.498930  | 1.233901  |
| H | -1.626120 | 3.020424  | -1.838923 |
| H | -1.913528 | 3.453433  | -0.161620 |
| H | -3.991910 | 2.386813  | -2.136250 |
| H | -3.933928 | 4.028936  | -1.489077 |
| H | -4.481269 | 3.290621  | 0.744873  |
| H | -5.589860 | 2.436371  | -0.325550 |
| H | -5.517527 | 1.180884  | 1.961860  |
| H | -5.871312 | 0.171328  | 0.563188  |
| H | -3.876546 | -0.382836 | 2.811982  |
| H | -5.267047 | -1.353127 | 2.308804  |
| H | -4.135028 | -1.876990 | 0.154060  |
| H | -3.046709 | -2.284826 | 1.482834  |
| H | -0.763006 | 0.502623  | -1.518606 |

62 atoms

7-isomer, structure TS34 in vacuum

|   |           |           |          |
|---|-----------|-----------|----------|
| O | -0.150590 | -0.619741 | 2.063823 |
| O | 0.092091  | 1.090228  | 0.289278 |
| C | 0.768210  | 0.188424  | 1.817719 |
| C | 1.058994  | 1.341369  | 2.771776 |
| H | 2.022013  | 1.791358  | 2.519457 |

|   |           |           |           |
|---|-----------|-----------|-----------|
| H | 1.194479  | 0.854787  | 3.744166  |
| C | -0.033422 | 2.418276  | 2.875366  |
| H | -1.005389 | 1.966726  | 2.656509  |
| H | -0.082587 | 2.760046  | 3.915666  |
| C | 0.211127  | 3.660485  | 1.998400  |
| H | 1.231191  | 4.018131  | 2.192680  |
| H | -0.450299 | 4.466276  | 2.340689  |
| C | 0.023278  | 3.500626  | 0.482307  |
| H | -1.048682 | 3.417672  | 0.254455  |
| H | 0.375792  | 4.414382  | -0.010437 |
| C | 0.716048  | 2.267007  | -0.120097 |
| H | 1.771500  | 2.261387  | 0.197872  |
| C | 0.739710  | 2.313300  | -1.675974 |
| H | 1.149311  | 1.357877  | -2.018523 |
| C | 1.509113  | 3.413023  | -2.248254 |
| H | -0.292870 | 2.357730  | -2.046715 |
| C | 2.156675  | 4.322487  | -2.697097 |
| H | 2.731257  | 5.122708  | -3.097819 |
| O | 1.969000  | -0.260060 | 1.289141  |
| C | 1.881714  | -1.445467 | 0.510323  |
| C | 3.229551  | -1.775706 | -0.083916 |
| H | 1.144396  | -1.284732 | -0.285169 |
| H | 1.522771  | -2.273452 | 1.130221  |
| C | 4.199990  | -0.794535 | -0.300418 |
| C | 3.508550  | -3.091244 | -0.467597 |
| C | 5.417945  | -1.122505 | -0.893257 |
| H | 3.997484  | 0.223221  | 0.009510  |
| C | 4.722017  | -3.419828 | -1.066226 |
| H | 2.769435  | -3.869204 | -0.291713 |
| H | 6.162747  | -0.348378 | -1.051442 |
| C | 5.683309  | -2.433840 | -1.281380 |
| H | 4.921235  | -4.447455 | -1.355221 |
| H | 6.632941  | -2.687303 | -1.742356 |
| H | -1.445892 | 0.745781  | -0.049269 |
| N | -4.010214 | -1.222717 | -0.705679 |
| C | -2.829703 | -0.791553 | -0.183515 |
| N | -2.045178 | -1.632498 | 0.494738  |
| C | -2.381706 | -3.031338 | 0.699471  |
| C | -3.894866 | -3.181552 | 0.806997  |
| C | -4.547156 | -2.557100 | -0.420644 |
| C | -4.039093 | 0.799182  | -2.138622 |
| C | -3.278366 | 1.458055  | -0.993390 |
| N | -2.435224 | 0.472100  | -0.338793 |
| C | -4.823474 | -0.390117 | -1.597868 |
| H | -1.881957 | -3.356341 | 1.612927  |
| H | -1.994710 | -3.649147 | -0.121891 |
| H | -4.244956 | -2.679532 | 1.713768  |

|   |           |           |           |
|---|-----------|-----------|-----------|
| H | -4.182208 | -4.233665 | 0.876890  |
| H | -4.403645 | -3.199303 | -1.299952 |
| H | -5.627231 | -2.457201 | -0.270675 |
| H | -5.176003 | -1.022391 | -2.419773 |
| H | -5.713051 | -0.047017 | -1.053203 |
| H | -3.327219 | 0.466376  | -2.899638 |
| H | -4.726970 | 1.503832  | -2.612636 |
| H | -3.979570 | 1.908928  | -0.278248 |
| H | -2.632820 | 2.258696  | -1.356158 |
| H | -1.250861 | -1.227116 | 1.041618  |

62 atoms

7-isomer, structure I4 in vacuum

|   |           |           |           |
|---|-----------|-----------|-----------|
| O | 0.492603  | -1.208584 | 2.122782  |
| O | 0.444646  | 1.242043  | -0.075810 |
| C | 1.400361  | -0.414118 | 2.237858  |
| C | 1.297944  | 0.982196  | 2.806117  |
| H | 1.832496  | 1.631543  | 2.112710  |
| H | 1.893496  | 0.995342  | 3.726436  |
| C | -0.137688 | 1.472671  | 3.065625  |
| H | -0.849359 | 0.775335  | 2.620221  |
| H | -0.331112 | 1.441262  | 4.142713  |
| C | -0.430331 | 2.895858  | 2.555715  |
| H | 0.417880  | 3.553591  | 2.787581  |
| H | -1.273105 | 3.296175  | 3.130992  |
| C | -0.794338 | 3.040791  | 1.067509  |
| H | -1.694842 | 2.452904  | 0.850326  |
| H | -1.061286 | 4.089433  | 0.895260  |
| C | 0.283248  | 2.645741  | 0.045231  |
| H | 1.255089  | 3.027724  | 0.376854  |
| C | 0.008541  | 3.263088  | -1.352600 |
| H | 0.724413  | 2.817821  | -2.050963 |
| C | 0.119511  | 4.717004  | -1.396818 |
| H | -0.989105 | 2.958295  | -1.689486 |
| C | 0.228559  | 5.914721  | -1.408752 |
| H | 0.322560  | 6.974023  | -1.429790 |
| O | 2.672904  | -0.679103 | 1.886071  |
| C | 2.963904  | -1.938853 | 1.235676  |
| C | 3.677865  | -1.698377 | -0.070210 |
| H | 2.023541  | -2.472440 | 1.092719  |
| H | 3.588678  | -2.513362 | 1.922938  |
| C | 3.194375  | -0.757220 | -0.986996 |
| C | 4.812666  | -2.444573 | -0.393830 |
| C | 3.841677  | -0.578016 | -2.206351 |
| H | 2.322649  | -0.156272 | -0.744817 |
| C | 5.453918  | -2.269303 | -1.619191 |

|   |           |           |           |
|---|-----------|-----------|-----------|
| H | 5.202514  | -3.168063 | 0.317433  |
| H | 3.462494  | 0.157079  | -2.909577 |
| C | 4.969135  | -1.333608 | -2.528693 |
| H | 6.335886  | -2.856072 | -1.856501 |
| H | 5.469333  | -1.189035 | -3.481262 |
| H | -0.397542 | 0.815226  | -0.385084 |
| N | -3.761160 | -1.480923 | -0.844577 |
| C | -2.597613 | -0.905717 | -0.374383 |
| N | -2.199177 | -1.264245 | 0.892505  |
| C | -2.722783 | -2.439844 | 1.562954  |
| C | -4.235127 | -2.446195 | 1.393324  |
| C | -4.563667 | -2.446429 | -0.094365 |
| C | -3.058348 | -0.735221 | -3.083797 |
| C | -2.340540 | 0.386483  | -2.337173 |
| N | -1.882496 | -0.033034 | -1.022346 |
| C | -4.201985 | -1.248366 | -2.219288 |
| H | -2.437707 | -2.380266 | 2.614785  |
| H | -2.294074 | -3.372813 | 1.163133  |
| H | -4.651606 | -1.555577 | 1.873066  |
| H | -4.683937 | -3.324025 | 1.866287  |
| H | -4.407371 | -3.453099 | -0.511754 |
| H | -5.621921 | -2.204691 | -0.249958 |
| H | -4.587467 | -2.194684 | -2.616468 |
| H | -5.040083 | -0.536789 | -2.226278 |
| H | -2.350443 | -1.547279 | -3.280095 |
| H | -3.445218 | -0.393045 | -4.048447 |
| H | -3.013443 | 1.255686  | -2.256244 |
| H | -1.472207 | 0.725158  | -2.910385 |
| H | -1.246275 | -1.012779 | 1.124870  |

62 atoms

7-isomer, structure I5 in vacuum

|   |           |           |           |
|---|-----------|-----------|-----------|
| O | -3.906464 | 1.784699  | 1.492022  |
| O | 3.157589  | -0.873693 | 1.643580  |
| C | -4.028387 | 0.825000  | 0.771756  |
| C | -2.922673 | -0.126240 | 0.363749  |
| H | -2.807004 | -0.046875 | -0.724132 |
| H | -3.273737 | -1.148838 | 0.538782  |
| C | -1.597099 | 0.138958  | 1.075484  |
| H | -1.301797 | 1.180171  | 0.910802  |
| H | -1.742670 | 0.042406  | 2.156939  |
| C | -0.481879 | -0.804808 | 0.612887  |
| H | -0.330261 | -0.689866 | -0.468047 |
| H | -0.798051 | -1.842611 | 0.756665  |
| C | 0.836382  | -0.544843 | 1.347630  |
| H | 1.094846  | 0.517031  | 1.262281  |

|   |            |           |           |
|---|------------|-----------|-----------|
| H | 0.713998   | -0.736590 | 2.420892  |
| C | 2.058644   | -1.331817 | 0.869929  |
| H | 2.237193   | -1.124213 | -0.195382 |
| C | 1.937839   | -2.871916 | 1.043846  |
| H | 2.954324   | -3.279326 | 1.023947  |
| C | 1.147314   | -3.565608 | 0.030966  |
| H | 1.547957   | -3.085097 | 2.045968  |
| C | 0.530666   | -4.146207 | -0.822957 |
| H | -0.024930  | -4.656761 | -1.572619 |
| O | -5.203553  | 0.463201  | 0.207276  |
| C | -6.339910  | 1.314325  | 0.515475  |
| C | -7.543919  | 0.754391  | -0.186786 |
| H | -6.111887  | 2.330794  | 0.188635  |
| H | -6.471431  | 1.336798  | 1.599107  |
| C | -7.889744  | 1.194667  | -1.467012 |
| C | -8.325188  | -0.232532 | 0.420917  |
| C | -8.994597  | 0.662667  | -2.127131 |
| H | -7.288555  | 1.959828  | -1.949734 |
| C | -9.430116  | -0.767819 | -0.235448 |
| H | -8.064354  | -0.583655 | 1.415161  |
| H | -9.253748  | 1.016339  | -3.119973 |
| C | -9.767221  | -0.320143 | -1.511677 |
| H | -10.029785 | -1.531611 | 0.249291  |
| H | -10.630359 | -0.733920 | -2.023315 |
| H | 4.001320   | -1.082816 | 1.162135  |
| N | 6.673364   | 0.996265  | -0.808436 |
| C | 5.669655   | 0.461767  | -0.028253 |
| N | 4.886067   | 1.349939  | 0.669679  |
| C | 4.845492   | 2.767175  | 0.374702  |
| C | 6.275490   | 3.247219  | 0.159562  |
| C | 6.913476   | 2.430252  | -0.957808 |
| C | 6.826871   | -1.226502 | -1.873945 |
| C | 6.335823   | -1.748587 | -0.524297 |
| N | 5.435706   | -0.809416 | 0.121148  |
| C | 7.480643   | 0.135890  | -1.673940 |
| H | 4.384075   | 3.279592  | 1.221882  |
| H | 4.234524   | 2.993977  | -0.514255 |
| H | 6.837004   | 3.117366  | 1.089231  |
| H | 6.301040   | 4.308119  | -0.104254 |
| H | 6.529989   | 2.767129  | -1.933498 |
| H | 7.997226   | 2.595362  | -0.974685 |
| H | 7.607046   | 0.643570  | -2.637687 |
| H | 8.485104   | 0.020697  | -1.242676 |
| H | 5.972302   | -1.130932 | -2.551925 |
| H | 7.540785   | -1.913643 | -2.338234 |
| H | 7.201011   | -1.962736 | 0.123279  |
| H | 5.809883   | -2.698911 | -0.653325 |

|   |          |          |          |
|---|----------|----------|----------|
| H | 4.107021 | 0.916314 | 1.153091 |
|---|----------|----------|----------|

39 atoms

complex BnO-TBD in toluene

|   |           |           |           |
|---|-----------|-----------|-----------|
| N | -3.208356 | 0.586107  | 0.216068  |
| C | -1.991466 | -0.004781 | -0.030156 |
| N | -1.975904 | -1.378001 | -0.155718 |
| C | -3.178630 | -2.139609 | -0.441518 |
| C | -4.280639 | -1.639517 | 0.483110  |
| C | -4.476374 | -0.143811 | 0.266753  |
| C | -2.125393 | 2.726365  | -0.372715 |
| C | -0.843577 | 2.059306  | 0.123114  |
| N | -0.854440 | 0.624739  | -0.112941 |
| C | -3.325408 | 2.045162  | 0.274451  |
| H | -2.964653 | -3.195171 | -0.261125 |
| H | -3.493867 | -2.044545 | -1.492549 |
| H | -3.991883 | -1.836874 | 1.519562  |
| H | -5.222295 | -2.160595 | 0.291693  |
| H | -5.032705 | 0.030232  | -0.666331 |
| H | -5.080949 | 0.279701  | 1.076450  |
| H | -4.249849 | 2.331243  | -0.239281 |
| H | -3.431283 | 2.363254  | 1.320615  |
| H | -2.185591 | 2.624052  | -1.461356 |
| H | -2.138363 | 3.795335  | -0.140548 |
| H | -0.710984 | 2.272211  | 1.195548  |
| H | 0.029081  | 2.483916  | -0.380958 |
| H | -1.087991 | -1.734022 | -0.490760 |
| O | 0.962042  | -1.252785 | -0.880184 |
| C | 1.861224  | -1.523619 | 0.177342  |
| C | 3.140548  | -0.703709 | 0.132146  |
| H | 2.119395  | -2.586927 | 0.107436  |
| H | 1.374899  | -1.379499 | 1.152353  |
| C | 3.597441  | -0.153034 | -1.067270 |
| C | 3.904107  | -0.520723 | 1.289402  |
| C | 4.791889  | 0.564962  | -1.109450 |
| H | 3.000222  | -0.285645 | -1.962293 |
| C | 5.100891  | 0.191668  | 1.249934  |
| H | 3.556325  | -0.934268 | 2.233049  |
| H | 5.131761  | 0.989990  | -2.049197 |
| C | 5.549432  | 0.738100  | 0.047756  |
| H | 5.679361  | 0.327479  | 2.158782  |
| H | 6.478803  | 1.298119  | 0.015245  |
| H | 0.450867  | -0.426172 | -0.654126 |

23 atoms

3-isomer in toluene

|   |           |           |           |
|---|-----------|-----------|-----------|
| O | -0.299084 | 2.412793  | 0.512490  |
| C | -0.565963 | 1.329551  | 0.054411  |
| O | -1.846674 | 1.088362  | -0.306105 |
| C | -2.291295 | -0.163828 | -0.879974 |
| H | -1.707708 | -0.387130 | -1.778651 |
| H | -3.309952 | 0.060090  | -1.194030 |
| C | -2.279475 | -1.321910 | 0.110013  |
| H | -2.719498 | -0.971325 | 1.050451  |
| H | -2.953649 | -2.094768 | -0.275841 |
| C | -0.898992 | -1.939170 | 0.353447  |
| H | -0.545859 | -2.400749 | -0.577403 |
| H | -0.996220 | -2.755162 | 1.076782  |
| C | 0.171710  | -0.963491 | 0.852452  |
| H | -0.098972 | -0.567334 | 1.838315  |
| H | 1.103232  | -1.518730 | 0.990241  |
| C | 0.465774  | 0.215710  | -0.108361 |
| H | 0.418224  | -0.157816 | -1.137828 |
| C | 1.877364  | 0.805536  | 0.114568  |
| H | 1.987999  | 1.717068  | -0.478524 |
| C | 2.942957  | -0.132101 | -0.230148 |
| H | 1.978354  | 1.118962  | 1.158094  |
| C | 3.814023  | -0.908087 | -0.523269 |
| H | 4.593495  | -1.585604 | -0.781510 |

62 atoms

3-isomer, structure I1 in toluene

|   |          |           |           |
|---|----------|-----------|-----------|
| N | 4.253836 | 1.863148  | 0.150900  |
| C | 3.131805 | 1.069832  | 0.062593  |
| N | 1.925826 | 1.682927  | 0.284801  |
| C | 1.761459 | 3.126189  | 0.280336  |
| C | 2.904044 | 3.729532  | 1.085172  |
| C | 4.228623 | 3.291555  | 0.472705  |
| C | 5.465428 | 0.036971  | -0.987825 |
| C | 4.438061 | -0.866416 | -0.310004 |
| N | 3.145367 | -0.210365 | -0.182978 |
| C | 5.573835 | 1.336083  | -0.199761 |
| H | 0.789415 | 3.349134  | 0.718352  |
| H | 1.765654 | 3.535739  | -0.742459 |
| H | 2.831630 | 3.385428  | 2.121057  |
| H | 2.849392 | 4.821342  | 1.090126  |
| H | 4.428207 | 3.870596  | -0.441129 |
| H | 5.055348 | 3.499047  | 1.161990  |
| H | 6.098542 | 2.098301  | -0.787391 |
| H | 6.161423 | 1.181843  | 0.715865  |
| H | 5.137835 | 0.248256  | -2.011128 |

|   |           |           |           |
|---|-----------|-----------|-----------|
| H | 6.447501  | -0.441378 | -1.047173 |
| H | 4.818277  | -1.173415 | 0.677534  |
| H | 4.297439  | -1.787420 | -0.883066 |
| H | 1.107323  | 1.114439  | 0.123505  |
| O | -1.578327 | 2.805664  | 0.942546  |
| C | -2.066300 | 1.881421  | 0.334569  |
| O | -1.242106 | 0.937192  | -0.163798 |
| C | -1.711919 | -0.226926 | -0.909177 |
| H | -2.444420 | -0.767431 | -0.302741 |
| H | -0.816486 | -0.842022 | -0.984404 |
| C | -2.260347 | 0.132016  | -2.282506 |
| H | -1.567263 | 0.836123  | -2.757270 |
| H | -2.234189 | -0.778223 | -2.891432 |
| C | -3.686482 | 0.690929  | -2.278788 |
| H | -4.372749 | -0.089550 | -1.926808 |
| H | -3.987114 | 0.915640  | -3.307362 |
| C | -3.892783 | 1.944575  | -1.422234 |
| H | -3.305934 | 2.781999  | -1.818176 |
| H | -4.941734 | 2.243376  | -1.497173 |
| C | -3.566397 | 1.759070  | 0.081590  |
| H | -3.891801 | 0.757750  | 0.384620  |
| C | -4.308896 | 2.786606  | 0.966820  |
| H | -3.940944 | 2.714723  | 1.993739  |
| C | -5.757477 | 2.599609  | 0.955636  |
| H | -4.060550 | 3.799064  | 0.634045  |
| C | -6.948796 | 2.434116  | 0.946815  |
| H | -8.004178 | 2.294379  | 0.948293  |
| O | 1.071920  | -1.944403 | -0.533278 |
| C | 0.826111  | -2.530338 | 0.726565  |
| C | 0.046235  | -3.820138 | 0.589684  |
| H | 0.269209  | -1.844966 | 1.385167  |
| H | 1.776046  | -2.742731 | 1.240944  |
| C | 0.009031  | -4.517574 | -0.619681 |
| C | -0.630186 | -4.351962 | 1.693142  |
| C | -0.686076 | -5.722528 | -0.722575 |
| H | 0.524296  | -4.099874 | -1.476066 |
| C | -1.320864 | -5.557284 | 1.594407  |
| H | -0.617993 | -3.816193 | 2.639299  |
| H | -0.707462 | -6.251533 | -1.670779 |
| C | -1.351646 | -6.248392 | 0.382921  |
| H | -1.840458 | -5.954870 | 2.460978  |
| H | -1.893173 | -7.185745 | 0.302071  |
| H | 1.803030  | -1.271108 | -0.428273 |

62 atoms

3-isomer, structure TS12 in toluene



|   |           |           |           |
|---|-----------|-----------|-----------|
| N | 3.603373  | -1.532712 | -0.032809 |
| C | 2.297675  | -1.192015 | -0.185317 |
| N | 1.521056  | -1.868188 | -1.038989 |
| C | 1.974219  | -3.060272 | -1.738671 |
| C | 3.446463  | -2.903433 | -2.092433 |
| C | 4.235273  | -2.593690 | -0.826840 |
| C | 3.668324  | -0.169290 | 2.032291  |
| C | 2.575721  | 0.667760  | 1.381816  |
| N | 1.775228  | -0.175563 | 0.504624  |
| C | 4.473585  | -0.871268 | 0.946957  |
| H | 1.359279  | -3.171558 | -2.632770 |
| H | 1.820100  | -3.956364 | -1.123020 |
| H | 3.561985  | -2.090116 | -2.814822 |
| H | 3.836666  | -3.814717 | -2.551418 |
| H | 4.338035  | -3.493499 | -0.206912 |
| H | 5.245981  | -2.259904 | -1.079584 |
| H | 5.119474  | -1.637969 | 1.384931  |
| H | 5.125428  | -0.157897 | 0.426781  |
| H | 3.215285  | -0.909314 | 2.698810  |
| H | 4.332699  | 0.457011  | 2.632179  |
| H | 3.013211  | 1.504698  | 0.823236  |
| H | 1.903930  | 1.097517  | 2.125085  |
| H | 0.507768  | -1.637470 | -1.093206 |
| O | -1.153767 | -1.313310 | -1.310706 |
| C | -1.651852 | -0.937736 | -0.229861 |
| O | -1.186364 | -1.639614 | 0.879263  |
| C | -1.596015 | -1.256883 | 2.200266  |
| H | -1.760623 | -0.178766 | 2.234585  |
| H | -0.739734 | -1.483003 | 2.841506  |
| C | -2.815069 | -2.049606 | 2.656090  |
| H | -2.605949 | -3.113678 | 2.493070  |
| H | -2.935928 | -1.917985 | 3.738814  |
| C | -4.112986 | -1.655338 | 1.945120  |
| H | -4.423931 | -0.659142 | 2.286096  |
| H | -4.909646 | -2.341451 | 2.255012  |
| C | -4.038896 | -1.641186 | 0.411789  |
| H | -3.709407 | -2.617118 | 0.036074  |
| H | -5.055083 | -1.493922 | 0.032711  |
| C | -3.146729 | -0.529159 | -0.189342 |
| H | -3.248913 | 0.368515  | 0.423649  |
| C | -3.614262 | -0.189320 | -1.626530 |
| H | -2.874119 | 0.441014  | -2.120734 |
| C | -4.915050 | 0.476239  | -1.665726 |
| H | -3.650651 | -1.110971 | -2.215884 |
| C | -5.981527 | 1.034108  | -1.690659 |
| H | -6.922737 | 1.530066  | -1.719798 |
| O | -0.806175 | 0.687134  | 0.238799  |

|   |           |          |           |
|---|-----------|----------|-----------|
| C | -0.831713 | 1.662130 | -0.760772 |
| C | 0.075144  | 2.838588 | -0.435718 |
| H | -1.853687 | 2.063890 | -0.891265 |
| H | -0.536867 | 1.246914 | -1.740028 |
| C | 0.019640  | 3.439450 | 0.827936  |
| C | 0.966861  | 3.357333 | -1.378135 |
| C | 0.824572  | 4.532590 | 1.136343  |
| H | -0.662438 | 3.034614 | 1.568215  |
| C | 1.777043  | 4.453302 | -1.074938 |
| H | 1.029094  | 2.898409 | -2.361418 |
| H | 0.762318  | 4.990130 | 2.119535  |
| C | 1.707867  | 5.045152 | 0.184089  |
| H | 2.462485  | 4.842341 | -1.822238 |
| H | 2.335234  | 5.898443 | 0.423124  |
| H | 0.763839  | 0.088097 | 0.374519  |

62 atoms

3-isomer, structure I2 in toluene

|   |           |           |           |
|---|-----------|-----------|-----------|
| N | 3.772422  | -1.451071 | -0.031981 |
| C | 2.428100  | -1.158994 | -0.100072 |
| N | 1.597629  | -1.682204 | -0.958956 |
| C | 2.101172  | -2.701461 | -1.866388 |
| C | 3.541067  | -2.421805 | -2.290147 |
| C | 4.408276  | -2.296356 | -1.043994 |
| C | 3.959859  | -0.249184 | 2.132356  |
| C | 2.786583  | 0.580742  | 1.628896  |
| N | 1.934887  | -0.277727 | 0.827432  |
| C | 4.689422  | -0.853626 | 0.939443  |
| H | 1.445199  | -2.735426 | -2.741341 |
| H | 2.043192  | -3.698153 | -1.401020 |
| H | 3.573020  | -1.487082 | -2.859970 |
| H | 3.932692  | -3.214556 | -2.934400 |
| H | 4.613950  | -3.287896 | -0.617549 |
| H | 5.378387  | -1.852852 | -1.296068 |
| H | 5.383525  | -1.632581 | 1.274655  |
| H | 5.297211  | -0.083152 | 0.441569  |
| H | 3.583767  | -1.042064 | 2.785545  |
| H | 4.655459  | 0.362948  | 2.712564  |
| H | 3.151616  | 1.449441  | 1.060036  |
| H | 2.192758  | 0.967591  | 2.459438  |
| H | -0.089688 | -1.487577 | -0.961464 |
| O | -1.087779 | -1.361959 | -1.088202 |
| C | -1.616906 | -0.709768 | -0.017582 |
| O | -1.253449 | -1.423531 | 1.137232  |
| C | -1.704034 | -0.948802 | 2.414529  |
| H | -1.901017 | 0.125606  | 2.372560  |

|   |           |           |           |
|---|-----------|-----------|-----------|
| H | -0.865979 | -1.102621 | 3.099155  |
| C | -2.923104 | -1.735408 | 2.875388  |
| H | -2.661945 | -2.799786 | 2.861292  |
| H | -3.137796 | -1.479218 | 3.920449  |
| C | -4.168200 | -1.494700 | 2.016676  |
| H | -4.550633 | -0.482103 | 2.201775  |
| H | -4.959061 | -2.177299 | 2.347106  |
| C | -3.967159 | -1.673994 | 0.503239  |
| H | -3.501814 | -2.642353 | 0.291376  |
| H | -4.958745 | -1.699056 | 0.040970  |
| C | -3.161698 | -0.558416 | -0.197781 |
| H | -3.444490 | 0.398527  | 0.252840  |
| C | -3.548060 | -0.509307 | -1.701930 |
| H | -2.840871 | 0.097408  | -2.268909 |
| C | -4.897280 | 0.007490  | -1.923922 |
| H | -3.462120 | -1.516191 | -2.120332 |
| C | -6.003029 | 0.449088  | -2.099187 |
| H | -6.981317 | 0.835399  | -2.262430 |
| O | -0.972706 | 0.586702  | 0.184331  |
| C | -1.029076 | 1.527619  | -0.894579 |
| C | -0.137099 | 2.697320  | -0.562491 |
| H | -2.059562 | 1.876897  | -1.031016 |
| H | -0.701753 | 1.046239  | -1.819887 |
| C | -0.519678 | 3.624568  | 0.413210  |
| C | 1.086849  | 2.871798  | -1.212798 |
| C | 0.301474  | 4.703246  | 0.729928  |
| H | -1.470103 | 3.500314  | 0.923795  |
| C | 1.910286  | 3.954177  | -0.902706 |
| H | 1.396905  | 2.155566  | -1.967743 |
| H | -0.010234 | 5.417012  | 1.485979  |
| C | 1.519379  | 4.871747  | 0.070104  |
| H | 2.854690  | 4.080990  | -1.422618 |
| H | 2.157209  | 5.716206  | 0.311224  |
| H | 0.971584  | 0.001301  | 0.678908  |

62 atoms

3-isomer, structure TS23 in toluene

|   |          |           |           |
|---|----------|-----------|-----------|
| N | 3.774412 | -1.425888 | -0.259793 |
| C | 2.418268 | -1.197316 | -0.205705 |
| N | 1.592992 | -1.371807 | -1.200360 |
| C | 2.119762 | -1.926522 | -2.437936 |
| C | 3.539566 | -1.439415 | -2.718547 |
| C | 4.424883 | -1.774425 | -1.524532 |
| C | 3.955418 | -1.148691 | 2.202847  |
| C | 2.731038 | -0.253249 | 2.064361  |
| N | 1.904831 | -0.784137 | 0.996737  |

|   |           |           |           |
|---|-----------|-----------|-----------|
| C | 4.684378  | -1.209324 | 0.866172  |
| H | 1.449097  | -1.640699 | -3.253457 |
| H | 2.109952  | -3.027326 | -2.404268 |
| H | 3.523774  | -0.355822 | -2.876692 |
| H | 3.950962  | -1.897857 | -3.622612 |
| H | 4.679780  | -2.843065 | -1.522821 |
| H | 5.370411  | -1.223439 | -1.582960 |
| H | 5.417762  | -2.023436 | 0.871883  |
| H | 5.248428  | -0.278649 | 0.703855  |
| H | 3.632883  | -2.150095 | 2.502285  |
| H | 4.635410  | -0.770648 | 2.970787  |
| H | 3.038248  | 0.786231  | 1.872708  |
| H | 2.140626  | -0.250850 | 2.982784  |
| H | -0.113357 | -1.210078 | -1.131947 |
| O | -1.112009 | -1.086393 | -1.230544 |
| C | -1.651153 | -0.601278 | -0.076862 |
| O | -1.229606 | -1.445041 | 0.974316  |
| C | -1.733716 | -1.199224 | 2.296844  |
| H | -2.021900 | -0.150146 | 2.403215  |
| H | -0.893172 | -1.379256 | 2.972482  |
| C | -2.880590 | -2.148506 | 2.614774  |
| H | -2.525473 | -3.171013 | 2.442862  |
| H | -3.116906 | -2.074383 | 3.683612  |
| C | -4.142219 | -1.888740 | 1.786424  |
| H | -4.618156 | -0.959747 | 2.127083  |
| H | -4.865286 | -2.686633 | 1.989173  |
| C | -3.923533 | -1.797132 | 0.267908  |
| H | -3.382520 | -2.676718 | -0.096620 |
| H | -4.908873 | -1.820870 | -0.207474 |
| C | -3.203542 | -0.520383 | -0.218905 |
| H | -3.535927 | 0.319410  | 0.399863  |
| C | -3.615135 | -0.220258 | -1.686372 |
| H | -2.967877 | 0.538115  | -2.128645 |
| C | -5.003442 | 0.221906  | -1.805361 |
| H | -3.458148 | -1.120707 | -2.286778 |
| C | -6.142516 | 0.600277  | -1.893045 |
| H | -7.150180 | 0.932165  | -1.979051 |
| O | -1.074445 | 0.674186  | 0.298175  |
| C | -1.141159 | 1.745784  | -0.647531 |
| C | -0.143900 | 2.803433  | -0.246870 |
| H | -2.150482 | 2.174164  | -0.668055 |
| H | -0.905922 | 1.362376  | -1.644527 |
| C | -0.552274 | 3.968290  | 0.405932  |
| C | 1.217791  | 2.620705  | -0.513166 |
| C | 0.377131  | 4.938012  | 0.782260  |
| H | -1.606325 | 4.119835  | 0.620627  |
| C | 2.148632  | 3.586375  | -0.139647 |

|   |          |           |           |
|---|----------|-----------|-----------|
| H | 1.541489 | 1.714761  | -1.016679 |
| H | 0.043969 | 5.840008  | 1.285877  |
| C | 1.729851 | 4.749007  | 0.509376  |
| H | 3.201120 | 3.437313  | -0.360473 |
| H | 2.454778 | 5.503919  | 0.797135  |
| H | 0.923422 | -0.542011 | 0.970662  |

62 atoms

3-isomer, structure I3 in toluene

|   |           |           |           |
|---|-----------|-----------|-----------|
| N | 4.113078  | -0.696204 | -0.555071 |
| C | 2.747060  | -0.837655 | -0.486668 |
| N | 1.889559  | -0.139314 | -1.179233 |
| C | 2.401940  | 0.819070  | -2.146200 |
| C | 3.701670  | 1.465583  | -1.672833 |
| C | 4.714487  | 0.372881  | -1.354764 |
| C | 4.427818  | -2.766443 | 0.777865  |
| C | 3.065413  | -2.439686 | 1.374612  |
| N | 2.257337  | -1.813371 | 0.344895  |
| C | 5.055356  | -1.487762 | 0.237256  |
| H | 1.635806  | 1.581818  | -2.312414 |
| H | 2.568344  | 0.333433  | -3.120541 |
| H | 3.502616  | 2.059406  | -0.774637 |
| H | 4.112205  | 2.140722  | -2.429290 |
| H | 5.128974  | -0.049602 | -2.280376 |
| H | 5.557290  | 0.785334  | -0.789064 |
| H | 5.914940  | -1.727783 | -0.398193 |
| H | 5.437877  | -0.876002 | 1.067802  |
| H | 4.298624  | -3.493608 | -0.029029 |
| H | 5.089808  | -3.209035 | 1.526706  |
| H | 3.186619  | -1.794468 | 2.259191  |
| H | 2.554674  | -3.347529 | 1.703289  |
| H | 0.233499  | -0.504166 | -1.211401 |
| O | -0.749211 | -0.723754 | -1.333704 |
| C | -1.417418 | -0.695735 | -0.147989 |
| O | -0.715106 | -1.541157 | 0.753971  |
| C | -1.241014 | -1.709587 | 2.081971  |
| H | -1.865865 | -0.853968 | 2.345733  |
| H | -0.377507 | -1.698723 | 2.752531  |
| C | -1.989165 | -3.031201 | 2.185609  |
| H | -1.307594 | -3.831395 | 1.873786  |
| H | -2.231168 | -3.220382 | 3.238792  |
| C | -3.268736 | -3.082845 | 1.343890  |
| H | -4.034590 | -2.446039 | 1.805597  |
| H | -3.667901 | -4.102616 | 1.378837  |
| C | -3.111091 | -2.666265 | -0.128105 |
| H | -2.298898 | -3.227131 | -0.602474 |

|   |           |           |           |
|---|-----------|-----------|-----------|
| H | -4.029882 | -2.952961 | -0.648747 |
| C | -2.896149 | -1.155660 | -0.363313 |
| H | -3.502740 | -0.607582 | 0.364800  |
| C | -3.396752 | -0.765671 | -1.780468 |
| H | -3.074776 | 0.243298  | -2.042959 |
| C | -4.850866 | -0.840892 | -1.910287 |
| H | -2.923151 | -1.421788 | -2.516053 |
| C | -6.049441 | -0.889339 | -2.007085 |
| H | -7.108816 | -0.933297 | -2.100445 |
| O | -1.355376 | 0.588796  | 0.495205  |
| C | -1.767805 | 1.733703  | -0.242935 |
| C | -1.146096 | 2.968061  | 0.367930  |
| H | -2.861299 | 1.828684  | -0.238057 |
| H | -1.442651 | 1.630498  | -1.284196 |
| C | -1.898988 | 4.130264  | 0.546881  |
| C | 0.205344  | 2.974810  | 0.731244  |
| C | -1.314566 | 5.285273  | 1.067139  |
| H | -2.952525 | 4.134584  | 0.280864  |
| C | 0.788460  | 4.124705  | 1.256696  |
| H | 0.789031  | 2.069464  | 0.604198  |
| H | -1.914237 | 6.180151  | 1.201415  |
| C | 0.031434  | 5.285171  | 1.424475  |
| H | 1.837219  | 4.116714  | 1.538028  |
| H | 0.487461  | 6.180478  | 1.835246  |
| H | 1.250975  | -1.780046 | 0.473613  |

62 atoms

3-isomer, structure TSr in toluene

|   |          |           |           |
|---|----------|-----------|-----------|
| N | 3.628777 | -1.518479 | -0.733585 |
| C | 2.274469 | -1.329892 | -0.598095 |
| N | 1.581834 | -0.420437 | -1.225638 |
| C | 2.267658 | 0.438438  | -2.179124 |
| C | 3.705012 | 0.726526  | -1.753114 |
| C | 4.433721 | -0.593126 | -1.533949 |
| C | 3.491062 | -3.650539 | 0.529805  |
| C | 2.277579 | -3.026266 | 1.205372  |
| N | 1.597986 | -2.189947 | 0.232766  |
| C | 4.385582 | -2.542796 | -0.012233 |
| H | 1.704804 | 1.372196  | -2.266335 |
| H | 2.264536 | -0.018563 | -3.181011 |
| H | 3.694433 | 1.304076  | -0.823395 |
| H | 4.233303 | 1.319817  | -2.505066 |
| H | 4.684349 | -1.060944 | -2.495870 |
| H | 5.378961 | -0.425102 | -1.006303 |
| H | 5.130569 | -2.960271 | -0.698463 |
| H | 4.943338 | -2.072273 | 0.811003  |

|   |           |           |           |
|---|-----------|-----------|-----------|
| H | 3.152217  | -4.295313 | -0.286291 |
| H | 4.058573  | -4.266927 | 1.231755  |
| H | 2.592542  | -2.459305 | 2.095869  |
| H | 1.578516  | -3.795398 | 1.541478  |
| H | -0.075664 | -0.345418 | -1.176355 |
| O | -1.090541 | -0.280633 | -1.272234 |
| C | -1.726840 | -0.132374 | -0.083136 |
| O | -1.111255 | -1.029458 | 0.838566  |
| C | -1.733967 | -1.247461 | 2.114211  |
| H | -2.319415 | -0.371411 | 2.403148  |
| H | -0.916130 | -1.338630 | 2.833823  |
| C | -2.563745 | -2.527206 | 2.089730  |
| H | -1.911113 | -3.338898 | 1.746814  |
| H | -2.854976 | -2.777350 | 3.117469  |
| C | -3.814732 | -2.459667 | 1.204734  |
| H | -4.574584 | -1.840613 | 1.698769  |
| H | -4.246560 | -3.464279 | 1.135520  |
| C | -3.595544 | -1.909570 | -0.214688 |
| H | -2.820884 | -2.479348 | -0.738311 |
| H | -4.523417 | -2.061157 | -0.774354 |
| C | -3.244966 | -0.409229 | -0.250181 |
| H | -3.742158 | 0.086388  | 0.588315  |
| C | -3.752994 | 0.274598  | -1.543647 |
| H | -3.378702 | 1.301226  | -1.591382 |
| C | -5.210657 | 0.307479  | -1.642839 |
| H | -3.332423 | -0.240629 | -2.411423 |
| C | -6.411228 | 0.340605  | -1.717422 |
| H | -7.472749 | 0.372537  | -1.788340 |
| O | -1.580538 | 1.179624  | 0.511456  |
| C | -1.129819 | 2.281329  | -0.262503 |
| C | 0.001651  | 3.018621  | 0.424712  |
| H | -1.967072 | 2.973075  | -0.420364 |
| H | -0.805649 | 1.931364  | -1.245916 |
| C | 0.198897  | 4.379496  | 0.170306  |
| C | 0.877580  | 2.362256  | 1.292209  |
| C | 1.257516  | 5.069315  | 0.757724  |
| H | -0.484345 | 4.907458  | -0.490244 |
| C | 1.933340  | 3.052085  | 1.886326  |
| H | 0.718841  | 1.310981  | 1.499374  |
| H | 1.394431  | 6.126221  | 0.550539  |
| C | 2.129531  | 4.406689  | 1.620333  |
| H | 2.603315  | 2.530098  | 2.563081  |
| H | 2.949881  | 4.943330  | 2.086556  |
| H | 0.647089  | -1.897031 | 0.431617  |

62 atoms

3-isomer, structure I3r in toluene

|   |           |           |           |
|---|-----------|-----------|-----------|
| N | 4.341950  | 0.226712  | -0.496382 |
| C | 3.040793  | -0.208077 | -0.403935 |
| N | 2.116131  | 0.010842  | -1.296572 |
| C | 2.495527  | 0.701981  | -2.519393 |
| C | 3.556748  | 1.768847  | -2.258799 |
| C | 4.757132  | 1.120614  | -1.579851 |
| C | 4.985824  | -1.191466 | 1.436939  |
| C | 3.537864  | -1.029380 | 1.881279  |
| N | 2.705853  | -0.957985 | 0.695210  |
| C | 5.360624  | -0.032100 | 0.522050  |
| H | 1.597145  | 1.151397  | -2.952174 |
| H | 2.870719  | -0.013534 | -3.267695 |
| H | 3.136292  | 2.543307  | -1.608746 |
| H | 3.875630  | 2.254045  | -3.185875 |
| H | 5.354526  | 0.557399  | -2.309643 |
| H | 5.415474  | 1.886333  | -1.154296 |
| H | 6.305954  | -0.244543 | 0.010544  |
| H | 5.521842  | 0.879362  | 1.116830  |
| H | 5.091119  | -2.141275 | 0.904706  |
| H | 5.661465  | -1.210641 | 2.296002  |
| H | 3.436931  | -0.134982 | 2.516435  |
| H | 3.213287  | -1.886547 | 2.475446  |
| H | 0.520259  | -0.570583 | -1.215218 |
| O | -0.432078 | -0.886080 | -1.340764 |
| C | -1.169195 | -0.912107 | -0.191242 |
| O | -0.273570 | -1.313442 | 0.857190  |
| C | -0.834945 | -1.666177 | 2.129866  |
| H | -1.778090 | -1.134512 | 2.283556  |
| H | -0.130257 | -1.298158 | 2.881239  |
| C | -0.988944 | -3.179416 | 2.246323  |
| H | -0.014555 | -3.628785 | 2.021256  |
| H | -1.212788 | -3.430697 | 3.290549  |
| C | -2.062708 | -3.784257 | 1.332967  |
| H | -3.055899 | -3.536143 | 1.728685  |
| H | -1.985450 | -4.876108 | 1.382298  |
| C | -2.007992 | -3.344138 | -0.139734 |
| H | -1.020954 | -3.543488 | -0.569838 |
| H | -2.719175 | -3.961740 | -0.696242 |
| C | -2.377208 | -1.865680 | -0.359353 |
| H | -3.114107 | -1.570416 | 0.392617  |
| C | -3.025888 | -1.616676 | -1.743314 |
| H | -3.145631 | -0.539564 | -1.888025 |
| C | -4.326160 | -2.265600 | -1.893891 |
| H | -2.345088 | -1.958458 | -2.527387 |
| C | -5.400168 | -2.796316 | -2.009292 |
| H | -6.351286 | -3.261419 | -2.118018 |



|   |           |           |           |
|---|-----------|-----------|-----------|
| O | -1.746049 | 0.344119  | 0.149828  |
| C | -0.842103 | 1.453504  | 0.216231  |
| C | -1.639359 | 2.705686  | 0.475463  |
| H | -0.293637 | 1.532647  | -0.727042 |
| H | -0.110001 | 1.293184  | 1.013903  |
| C | -2.550254 | 3.173737  | -0.478877 |
| C | -1.488639 | 3.420805  | 1.665131  |
| C | -3.289273 | 4.330017  | -0.248709 |
| H | -2.678182 | 2.624630  | -1.406517 |
| C | -2.223932 | 4.583377  | 1.898595  |
| H | -0.790904 | 3.065152  | 2.418081  |
| H | -3.991681 | 4.680629  | -0.998435 |
| C | -3.126872 | 5.039958  | 0.942095  |
| H | -2.093614 | 5.127984  | 2.828568  |
| H | -3.702154 | 5.942780  | 1.121247  |
| H | 1.713613  | -1.153846 | 0.774069  |

62 atoms

3-isomer, structure TSr2 in toluene

|   |           |           |           |
|---|-----------|-----------|-----------|
| N | -4.463051 | -0.731745 | -0.377105 |
| C | -3.181951 | -0.269553 | -0.187200 |
| N | -2.449912 | 0.299371  | -1.102334 |
| C | -3.046659 | 0.531157  | -2.409051 |
| C | -4.000786 | -0.595571 | -2.800425 |
| C | -5.059116 | -0.752304 | -1.715012 |
| C | -4.733007 | -1.081057 | 2.068155  |
| C | -3.220110 | -1.261742 | 2.082907  |
| N | -2.653825 | -0.386924 | 1.074059  |
| C | -5.259182 | -1.375927 | 0.668540  |
| H | -2.240034 | 0.622680  | -3.141760 |
| H | -3.586166 | 1.491141  | -2.423530 |
| H | -3.433058 | -1.526361 | -2.902406 |
| H | -4.485235 | -0.397930 | -3.761079 |
| H | -5.810404 | 0.045399  | -1.792031 |
| H | -5.592021 | -1.702369 | -1.834774 |
| H | -6.293569 | -1.027532 | 0.572409  |
| H | -5.275360 | -2.462296 | 0.495430  |
| H | -4.971056 | -0.051827 | 2.351962  |
| H | -5.216852 | -1.748314 | 2.786154  |
| H | -2.964521 | -2.319024 | 1.910074  |
| H | -2.802308 | -0.982468 | 3.052588  |
| H | -0.787503 | 0.591648  | -1.002926 |
| O | 0.191729  | 0.759614  | -1.193412 |
| C | 0.982680  | 0.900418  | -0.084382 |
| O | 0.131163  | 0.725192  | 1.051407  |
| C | 0.626697  | 1.098892  | 2.346633  |

|   |           |           |           |
|---|-----------|-----------|-----------|
| H | 1.714201  | 0.989995  | 2.379278  |
| H | 0.210136  | 0.367842  | 3.044903  |
| C | 0.164076  | 2.504894  | 2.714747  |
| H | -0.923490 | 2.536830  | 2.582118  |
| H | 0.352526  | 2.667699  | 3.783115  |
| C | 0.822821  | 3.626154  | 1.901929  |
| H | 1.860493  | 3.753629  | 2.236010  |
| H | 0.315663  | 4.569119  | 2.134209  |
| C | 0.829433  | 3.422239  | 0.378092  |
| H | -0.188472 | 3.273251  | 0.001279  |
| H | 1.195353  | 4.346251  | -0.079162 |
| C | 1.724979  | 2.260692  | -0.090061 |
| H | 2.575044  | 2.169261  | 0.592422  |
| C | 2.306760  | 2.500940  | -1.505140 |
| H | 2.805717  | 1.588716  | -1.843486 |
| C | 3.254213  | 3.611788  | -1.554772 |
| H | 1.485665  | 2.678777  | -2.204780 |
| C | 4.039246  | 4.523505  | -1.587210 |
| H | 4.735767  | 5.327429  | -1.624069 |
| O | 2.013235  | -0.077746 | -0.054836 |
| C | 1.585712  | -1.418675 | -0.259321 |
| C | 2.756088  | -2.366661 | -0.137101 |
| H | 1.124515  | -1.509874 | -1.247487 |
| H | 0.818905  | -1.679769 | 0.480847  |
| C | 4.036741  | -1.934199 | 0.209985  |
| C | 2.548138  | -3.730285 | -0.377816 |
| C | 5.087708  | -2.846650 | 0.315505  |
| H | 4.207284  | -0.880828 | 0.392992  |
| C | 3.594520  | -4.641190 | -0.270963 |
| H | 1.556933  | -4.081570 | -0.654164 |
| H | 6.078659  | -2.493379 | 0.584027  |
| C | 4.872303  | -4.201263 | 0.077292  |
| H | 3.414552  | -5.694610 | -0.462323 |
| H | 5.690825  | -4.909383 | 0.159002  |
| H | -1.681521 | -0.107135 | 1.135564  |

62 atoms

3-isomer, structure I3r2 in toluene

|   |          |           |           |
|---|----------|-----------|-----------|
| N | 4.496077 | 1.060666  | -0.438596 |
| C | 3.199572 | 0.657640  | -0.227404 |
| N | 2.582140 | -0.263141 | -0.915988 |
| C | 3.333935 | -0.966897 | -1.944163 |
| C | 4.333745 | -0.046689 | -2.641481 |
| C | 5.251925 | 0.572844  | -1.595055 |
| C | 4.462755 | 2.383534  | 1.666261  |
| C | 2.962180 | 2.485402  | 1.424045  |

|   |           |           |           |
|---|-----------|-----------|-----------|
| N | 2.521399  | 1.246299  | 0.810502  |
| C | 5.164756  | 2.102892  | 0.343076  |
| H | 2.623331  | -1.377684 | -2.666980 |
| H | 3.867440  | -1.828246 | -1.512864 |
| H | 3.787667  | 0.741690  | -3.169778 |
| H | 4.931019  | -0.587462 | -3.381345 |
| H | 6.001236  | -0.156813 | -1.259395 |
| H | 5.801961  | 1.419062  | -2.021659 |
| H | 6.197794  | 1.784434  | 0.522096  |
| H | 5.218211  | 3.024050  | -0.255536 |
| H | 4.654711  | 1.573441  | 2.375758  |
| H | 4.856818  | 3.307618  | 2.097112  |
| H | 2.738582  | 3.362357  | 0.796964  |
| H | 2.420665  | 2.612741  | 2.363689  |
| H | 0.888587  | -0.301268 | -0.978051 |
| O | -0.108052 | -0.256014 | -1.140241 |
| C | -0.842439 | -0.603746 | -0.033997 |
| O | -0.263991 | 0.123817  | 1.061889  |
| C | -0.680399 | -0.196277 | 2.398547  |
| H | -1.708606 | -0.569511 | 2.392374  |
| H | -0.686884 | 0.753544  | 2.939619  |
| C | 0.291020  | -1.172683 | 3.055102  |
| H | 1.298901  | -0.755119 | 2.951143  |
| H | 0.077974  | -1.208030 | 4.130708  |
| C | 0.254801  | -2.593542 | 2.479698  |
| H | -0.665239 | -3.094066 | 2.808238  |
| H | 1.079997  | -3.167457 | 2.915884  |
| C | 0.335089  | -2.687601 | 0.947148  |
| H | 1.235997  | -2.187227 | 0.576087  |
| H | 0.438387  | -3.744903 | 0.685031  |
| C | -0.908695 | -2.133661 | 0.226793  |
| H | -1.784890 | -2.307095 | 0.858837  |
| C | -1.180801 | -2.850269 | -1.118920 |
| H | -1.977775 | -2.319382 | -1.646419 |
| C | -1.562577 | -4.251178 | -0.957024 |
| H | -0.293669 | -2.779750 | -1.754910 |
| C | -1.882714 | -5.402971 | -0.817930 |
| H | -2.169974 | -6.421230 | -0.702018 |
| O | -2.181153 | -0.206651 | -0.221185 |
| C | -2.371946 | 1.136052  | -0.661341 |
| C | -3.826837 | 1.524150  | -0.532065 |
| H | -2.044437 | 1.233417  | -1.700236 |
| H | -1.749716 | 1.808677  | -0.060859 |
| C | -4.769222 | 0.705429  | 0.092036  |
| C | -4.244051 | 2.756144  | -1.050528 |
| C | -6.100142 | 1.111867  | 0.199376  |
| H | -4.457850 | -0.253464 | 0.486805  |

|   |           |          |           |
|---|-----------|----------|-----------|
| C | -5.569828 | 3.164240 | -0.940883 |
| H | -3.523081 | 3.401587 | -1.546221 |
| H | -6.821303 | 0.461511 | 0.685065  |
| C | -6.505785 | 2.340946 | -0.313551 |
| H | -5.874632 | 4.123015 | -1.348953 |
| H | -7.541271 | 2.655344 | -0.229792 |
| H | 1.542230  | 0.986496 | 0.868046  |

62 atoms

3-isomer, structure TS34 in toluene

|   |           |           |           |
|---|-----------|-----------|-----------|
| N | -4.273819 | -1.217822 | -0.235078 |
| C | -3.015300 | -0.717458 | -0.156483 |
| N | -2.577394 | 0.148429  | -1.084359 |
| C | -3.408122 | 0.615261  | -2.184766 |
| C | -4.364012 | -0.495045 | -2.603939 |
| C | -5.149011 | -0.966820 | -1.386399 |
| C | -4.059143 | -1.930285 | 2.130479  |
| C | -2.570656 | -2.054967 | 1.823900  |
| N | -2.191721 | -1.063464 | 0.828938  |
| C | -4.850318 | -2.044089 | 0.833037  |
| H | -2.743037 | 0.899174  | -3.000958 |
| H | -3.969337 | 1.512166  | -1.893193 |
| H | -3.792431 | -1.326183 | -3.027240 |
| H | -5.058619 | -0.143505 | -3.370372 |
| H | -5.906907 | -0.224326 | -1.105743 |
| H | -5.678635 | -1.897813 | -1.610279 |
| H | -5.884348 | -1.719238 | 0.984998  |
| H | -4.886357 | -3.087154 | 0.494401  |
| H | -4.250779 | -0.962836 | 2.603812  |
| H | -4.385189 | -2.709531 | 2.823518  |
| H | -2.337971 | -3.068237 | 1.470694  |
| H | -1.965582 | -1.878490 | 2.714091  |
| H | -1.570983 | 0.362788  | -1.107203 |
| O | 0.129671  | 0.613443  | -1.409116 |
| C | 0.976781  | 0.909070  | -0.555805 |
| O | 0.060032  | 0.228740  | 1.121155  |
| C | 0.301889  | 0.767620  | 2.380178  |
| H | 1.375811  | 0.999726  | 2.514208  |
| H | 0.069470  | 0.026275  | 3.170289  |
| C | -0.525140 | 2.032542  | 2.663082  |
| H | -1.575723 | 1.792712  | 2.451471  |
| H | -0.472172 | 2.274685  | 3.734374  |
| C | -0.114579 | 3.276939  | 1.864411  |
| H | 0.845149  | 3.649954  | 2.245998  |
| H | -0.840564 | 4.073576  | 2.070475  |
| C | 0.003883  | 3.117838  | 0.338332  |

|   |           |           |           |
|---|-----------|-----------|-----------|
| H | -0.888662 | 2.635304  | -0.069434 |
| H | 0.032341  | 4.125063  | -0.090301 |
| C | 1.254534  | 2.352354  | -0.137421 |
| H | 2.003772  | 2.331210  | 0.656426  |
| C | 1.914678  | 3.032118  | -1.374189 |
| H | 2.726176  | 2.395404  | -1.740339 |
| C | 2.446541  | 4.362736  | -1.094889 |
| H | 1.176102  | 3.088974  | -2.181158 |
| C | 2.888547  | 5.455955  | -0.854121 |
| H | 3.285598  | 6.420877  | -0.644392 |
| O | 2.128123  | 0.175763  | -0.432687 |
| C | 2.032430  | -1.185444 | -0.876451 |
| C | 3.289304  | -1.914232 | -0.478726 |
| H | 1.884073  | -1.214736 | -1.958746 |
| H | 1.153297  | -1.628921 | -0.401549 |
| C | 3.705398  | -1.928165 | 0.858028  |
| C | 4.045503  | -2.608773 | -1.424802 |
| C | 4.849613  | -2.623291 | 1.236838  |
| H | 3.125704  | -1.384142 | 1.596187  |
| C | 5.190291  | -3.312037 | -1.047624 |
| H | 3.739926  | -2.597862 | -2.467358 |
| H | 5.161739  | -2.623365 | 2.276706  |
| C | 5.595513  | -3.320143 | 0.284379  |
| H | 5.767475  | -3.845953 | -1.796202 |
| H | 6.488072  | -3.862443 | 0.580373  |
| H | -1.255028 | -0.526600 | 0.942260  |

62 atoms

3-isomer, structure I4 in toluene

|   |          |           |           |
|---|----------|-----------|-----------|
| N | 4.188444 | -0.273379 | -0.170125 |
| C | 2.816783 | -0.383689 | -0.149820 |
| N | 2.244956 | -1.209168 | -1.078232 |
| C | 2.988579 | -2.050550 | -1.995821 |
| C | 4.263534 | -1.326223 | -2.411054 |
| C | 5.038624 | -0.933832 | -1.160072 |
| C | 4.000678 | 0.695947  | 2.096753  |
| C | 2.656730 | 1.208954  | 1.581620  |
| N | 2.032175 | 0.254734  | 0.677005  |
| C | 4.908760 | 0.409717  | 0.907011  |
| H | 2.351943 | -2.256716 | -2.858490 |
| H | 3.240714 | -3.020357 | -1.541611 |
| H | 4.001883 | -0.432974 | -2.986425 |
| H | 4.888213 | -1.962361 | -3.043744 |
| H | 5.505243 | -1.823822 | -0.711876 |
| H | 5.853387 | -0.247676 | -1.417150 |
| H | 5.752202 | -0.222192 | 1.210344  |

|   |           |           |           |
|---|-----------|-----------|-----------|
| H | 5.336376  | 1.343646  | 0.517563  |
| H | 3.836706  | -0.221843 | 2.671037  |
| H | 4.483776  | 1.418414  | 2.761309  |
| H | 2.803373  | 2.181408  | 1.085381  |
| H | 1.969710  | 1.391228  | 2.412463  |
| H | 1.235004  | -1.183555 | -1.132820 |
| O | -0.724726 | -1.182659 | -1.422188 |
| C | -1.683671 | -0.734677 | -0.826982 |
| O | -0.459211 | -0.483471 | 1.640017  |
| C | -0.248023 | -1.604086 | 2.481953  |
| H | -0.970410 | -1.536362 | 3.304570  |
| H | 0.754028  | -1.549727 | 2.930556  |
| C | -0.397012 | -2.963935 | 1.789623  |
| H | 0.253126  | -2.990855 | 0.907587  |
| H | 0.007860  | -3.710447 | 2.485975  |
| C | -1.828430 | -3.403562 | 1.417102  |
| H | -2.525701 | -3.059747 | 2.192708  |
| H | -1.859075 | -4.498127 | 1.467267  |
| C | -2.390373 | -3.029416 | 0.033238  |
| H | -1.681161 | -3.323063 | -0.746358 |
| H | -3.282720 | -3.644631 | -0.116940 |
| C | -2.793163 | -1.561994 | -0.191634 |
| H | -3.030854 | -1.078411 | 0.757839  |
| C | -4.050060 | -1.435998 | -1.107246 |
| H | -4.226046 | -0.380425 | -1.331945 |
| C | -5.255849 | -2.001007 | -0.508789 |
| H | -3.851886 | -1.932622 | -2.064619 |
| C | -6.246848 | -2.459903 | -0.004797 |
| H | -7.127561 | -2.861459 | 0.438091  |
| O | -1.950584 | 0.572882  | -0.729687 |
| C | -0.940317 | 1.503316  | -1.203953 |
| C | -1.248259 | 2.855114  | -0.621508 |
| H | -0.958106 | 1.516786  | -2.296009 |
| H | 0.035308  | 1.142350  | -0.874007 |
| C | -1.292016 | 3.019526  | 0.769031  |
| C | -1.471846 | 3.959793  | -1.444386 |
| C | -1.554897 | 4.270088  | 1.319179  |
| H | -1.125216 | 2.158901  | 1.409574  |
| C | -1.727396 | 5.215853  | -0.892907 |
| H | -1.447397 | 3.840523  | -2.523954 |
| H | -1.589546 | 4.387575  | 2.397730  |
| C | -1.770669 | 5.372514  | 0.489829  |
| H | -1.898836 | 6.067216  | -1.544017 |
| H | -1.973493 | 6.347542  | 0.921554  |
| H | 0.407144  | -0.249231 | 1.214523  |

62 atoms

3-isomer, structure I5 in toluene

|   |           |           |           |
|---|-----------|-----------|-----------|
| N | -6.217702 | -0.791762 | 0.455402  |
| C | -5.174447 | -0.185642 | -0.206427 |
| N | -4.896088 | 1.119116  | 0.131120  |
| C | -5.384476 | 1.735134  | 1.349958  |
| C | -6.853963 | 1.366292  | 1.508407  |
| C | -6.991333 | -0.151385 | 1.519963  |
| C | -5.351355 | -2.926927 | -0.432700 |
| C | -4.826393 | -2.072970 | -1.585989 |
| N | -4.460613 | -0.736572 | -1.146877 |
| C | -6.519743 | -2.206601 | 0.229614  |
| H | -5.259500 | 2.816222  | 1.259543  |
| H | -4.816752 | 1.413869  | 2.237815  |
| H | -7.418915 | 1.789992  | 0.673096  |
| H | -7.265419 | 1.775646  | 2.434763  |
| H | -6.669879 | -0.549715 | 2.494060  |
| H | -8.042016 | -0.436612 | 1.395793  |
| H | -6.750337 | -2.663601 | 1.198599  |
| H | -7.425107 | -2.294535 | -0.386523 |
| H | -4.548340 | -3.077049 | 0.296758  |
| H | -5.673900 | -3.914327 | -0.776194 |
| H | -5.587856 | -2.024286 | -2.380571 |
| H | -3.946579 | -2.541122 | -2.037053 |
| H | -4.052792 | 1.478248  | -0.302255 |
| O | 4.636334  | 1.472347  | -1.852731 |
| C | 4.181656  | 1.235929  | -0.757335 |
| O | -2.483806 | 1.098025  | -1.661578 |
| C | -1.256913 | 0.644929  | -1.110588 |
| H | -0.839421 | -0.171814 | -1.719290 |
| H | -1.406943 | 0.243866  | -0.095879 |
| C | -0.271080 | 1.803774  | -1.071275 |
| H | -0.168828 | 2.201250  | -2.087565 |
| H | -0.701878 | 2.610618  | -0.466248 |
| C | 1.102537  | 1.411574  | -0.519413 |
| H | 1.515176  | 0.595311  | -1.125025 |
| H | 0.992497  | 1.007832  | 0.495057  |
| C | 2.083448  | 2.588679  | -0.491718 |
| H | 2.231276  | 2.973562  | -1.507086 |
| H | 1.651259  | 3.406861  | 0.092862  |
| C | 3.462119  | 2.254614  | 0.113172  |
| H | 3.325462  | 1.818640  | 1.105519  |
| C | 4.361666  | 3.512584  | 0.233916  |
| H | 5.362178  | 3.214770  | 0.566913  |
| C | 3.837345  | 4.511915  | 1.160037  |
| H | 4.490829  | 3.952423  | -0.759838 |
| C | 3.408723  | 5.326651  | 1.933919  |

|   |           |           |           |
|---|-----------|-----------|-----------|
| H | 3.034081  | 6.054570  | 2.614325  |
| O | 4.248440  | 0.027899  | -0.167348 |
| C | 4.901325  | -1.025110 | -0.938632 |
| C | 4.898620  | -2.276819 | -0.109715 |
| H | 5.912607  | -0.694023 | -1.179352 |
| H | 4.355417  | -1.151269 | -1.874826 |
| C | 3.842402  | -3.187913 | -0.201514 |
| C | 5.943774  | -2.539958 | 0.780900  |
| C | 3.830237  | -4.340764 | 0.580215  |
| H | 3.025844  | -2.993866 | -0.890736 |
| C | 5.934971  | -3.691265 | 1.564464  |
| H | 6.769900  | -1.839284 | 0.859457  |
| H | 3.006187  | -5.041908 | 0.496841  |
| C | 4.877282  | -4.594194 | 1.464956  |
| H | 6.753994  | -3.885738 | 2.249287  |
| H | 4.870886  | -5.493598 | 2.072201  |
| H | -3.128464 | 0.342266  | -1.663986 |

23 atoms

7-isomer in toluene

|   |           |           |           |
|---|-----------|-----------|-----------|
| O | -2.538391 | -1.860653 | -0.158087 |
| O | -0.450908 | -1.179967 | -0.258733 |
| C | -1.744714 | -0.997166 | 0.115996  |
| C | -2.127448 | 0.287854  | 0.825570  |
| H | -1.553887 | 0.392865  | 1.753633  |
| H | -3.172547 | 0.162404  | 1.107353  |
| C | -1.957522 | 1.552773  | -0.041390 |
| H | -2.366709 | 1.364231  | -1.040393 |
| H | -2.576114 | 2.342763  | 0.394441  |
| C | -0.515754 | 2.059339  | -0.144636 |
| H | -0.172915 | 2.360776  | 0.853434  |
| H | -0.501905 | 2.967939  | -0.755251 |
| C | 0.486299  | 1.057544  | -0.728373 |
| H | 0.225217  | 0.803304  | -1.762439 |
| H | 1.472725  | 1.529610  | -0.761814 |
| C | 0.613349  | -0.246752 | 0.058753  |
| H | 0.603532  | -0.051738 | 1.135907  |
| C | 1.889242  | -1.036808 | -0.282573 |
| H | 1.818923  | -2.018212 | 0.195552  |
| C | 3.111789  | -0.364844 | 0.145257  |
| H | 1.915381  | -1.218360 | -1.362586 |
| C | 4.114184  | 0.190254  | 0.509426  |
| H | 5.006132  | 0.676213  | 0.828549  |

62 atoms



## 7-isomer, structure I1 in toluene

|   |           |           |           |
|---|-----------|-----------|-----------|
| O | -1.848767 | 0.997608  | -2.351170 |
| O | -2.516405 | 0.725293  | -0.281523 |
| C | -2.440662 | 0.297467  | -1.557688 |
| C | -3.143166 | -0.982795 | -1.951176 |
| H | -2.613881 | -1.819066 | -1.483197 |
| H | -2.999428 | -1.076526 | -3.027731 |
| C | -4.644579 | -1.031146 | -1.603504 |
| H | -5.119392 | -0.085761 | -1.891182 |
| H | -5.104605 | -1.801044 | -2.230501 |
| C | -4.951933 | -1.352149 | -0.136668 |
| H | -4.547626 | -2.344486 | 0.099820  |
| H | -6.037108 | -1.429792 | -0.011035 |
| C | -4.408029 | -0.342093 | 0.879272  |
| H | -4.883392 | 0.637045  | 0.744817  |
| H | -4.668645 | -0.680795 | 1.886730  |
| C | -2.895487 | -0.147028 | 0.820614  |
| H | -2.369960 | -1.095147 | 0.692710  |
| C | -2.313695 | 0.571217  | 2.050104  |
| H | -1.259760 | 0.780821  | 1.840995  |
| C | -2.433100 | -0.206403 | 3.279042  |
| H | -2.813958 | 1.539239  | 2.168316  |
| C | -2.526476 | -0.854346 | 4.288033  |
| H | -2.604017 | -1.425079 | 5.183250  |
| O | -0.144020 | -1.266615 | -0.488853 |
| C | 0.718865  | -1.827290 | -1.454010 |
| C | 1.769526  | -2.771009 | -0.887707 |
| H | 1.216819  | -1.041282 | -2.038027 |
| H | 0.091470  | -2.385742 | -2.159848 |
| C | 1.613270  | -3.349582 | 0.373536  |
| C | 2.896724  | -3.107357 | -1.645049 |
| C | 2.561450  | -4.245556 | 0.867432  |
| H | 0.744591  | -3.082784 | 0.964505  |
| C | 3.843807  | -4.004802 | -1.156738 |
| H | 3.037287  | -2.659452 | -2.626009 |
| H | 2.425743  | -4.684782 | 1.851316  |
| C | 3.678923  | -4.578360 | 0.104140  |
| H | 4.714155  | -4.252071 | -1.757162 |
| H | 4.417482  | -5.274901 | 0.488536  |
| H | 0.295143  | -0.460793 | -0.093020 |
| N | 2.284505  | 2.985149  | 0.387765  |
| C | 1.299171  | 2.087424  | 0.039326  |
| N | 0.411441  | 2.488583  | -0.918604 |
| C | 0.582427  | 3.675669  | -1.732243 |
| C | 1.116776  | 4.794317  | -0.847648 |
| C | 2.406470  | 4.325482  | -0.186792 |
| C | 3.456656  | 1.080193  | 1.439043  |

|   |           |           |           |
|---|-----------|-----------|-----------|
| C | 2.043083  | 0.554080  | 1.675607  |
| N | 1.149415  | 0.906660  | 0.581002  |
| C | 3.394452  | 2.591125  | 1.258474  |
| H | -0.389522 | 3.932165  | -2.157232 |
| H | 1.269256  | 3.501232  | -2.574858 |
| H | 0.369379  | 5.039274  | -0.087141 |
| H | 1.313298  | 5.698720  | -1.429607 |
| H | 3.227602  | 4.335014  | -0.919109 |
| H | 2.694976  | 5.013322  | 0.616348  |
| H | 4.325272  | 2.963948  | 0.814442  |
| H | 3.285691  | 3.090176  | 2.231242  |
| H | 3.865842  | 0.610781  | 0.538662  |
| H | 4.124220  | 0.835814  | 2.270632  |
| H | 1.663672  | 0.947361  | 2.632516  |
| H | 2.051655  | -0.534700 | 1.772514  |
| H | -0.313077 | 1.833907  | -1.182853 |

62 atoms

7-isomer, structure TS12 in toluene

|   |           |           |           |
|---|-----------|-----------|-----------|
| O | 1.055035  | -0.797891 | -2.261053 |
| O | 2.024100  | -0.915613 | -0.270847 |
| C | 1.735632  | -0.180012 | -1.420295 |
| C | 2.828752  | 0.779415  | -1.896653 |
| H | 2.858022  | 1.677407  | -1.276807 |
| H | 2.530814  | 1.087947  | -2.899459 |
| C | 4.225977  | 0.130761  | -1.938552 |
| H | 4.148168  | -0.895819 | -2.314721 |
| H | 4.837039  | 0.675233  | -2.666671 |
| C | 4.957740  | 0.155684  | -0.588812 |
| H | 5.050068  | 1.200900  | -0.265461 |
| H | 5.982629  | -0.207263 | -0.727861 |
| C | 4.303077  | -0.655783 | 0.536234  |
| H | 4.375798  | -1.728489 | 0.318547  |
| H | 4.858139  | -0.484328 | 1.464778  |
| C | 2.824566  | -0.339738 | 0.772852  |
| H | 2.644012  | 0.736543  | 0.809527  |
| C | 2.283258  | -0.967897 | 2.072024  |
| H | 1.199906  | -0.819168 | 2.083515  |
| C | 2.869821  | -0.413053 | 3.287986  |
| H | 2.449669  | -2.050980 | 2.036836  |
| C | 3.347897  | 0.057068  | 4.286883  |
| H | 3.772755  | 0.471128  | 5.170692  |
| O | 0.559655  | 1.060215  | -0.559094 |
| C | -0.083284 | 1.892853  | -1.472591 |
| C | -1.009970 | 2.901742  | -0.809264 |
| H | -0.663945 | 1.317153  | -2.215095 |

|   |           |           |           |
|---|-----------|-----------|-----------|
| H | 0.653628  | 2.469763  | -2.062449 |
| C | -0.730324 | 3.395821  | 0.469116  |
| C | -2.140888 | 3.386064  | -1.475568 |
| C | -1.552787 | 4.353456  | 1.061557  |
| H | 0.139014  | 3.013150  | 0.991716  |
| C | -2.965645 | 4.344574  | -0.888191 |
| H | -2.379047 | 3.006687  | -2.466376 |
| H | -1.316548 | 4.727990  | 2.053516  |
| C | -2.674212 | 4.833104  | 0.385078  |
| H | -3.839370 | 4.706414  | -1.422441 |
| H | -3.315571 | 5.578242  | 0.845715  |
| H | -0.559190 | 0.004192  | 0.049585  |
| N | -2.740097 | -2.444185 | 0.419783  |
| C | -1.699489 | -1.730860 | -0.082524 |
| N | -1.035532 | -2.174885 | -1.154434 |
| C | -1.407082 | -3.387598 | -1.867238 |
| C | -1.960753 | -4.404919 | -0.878475 |
| C | -3.102342 | -3.769877 | -0.095482 |
| C | -3.457436 | -0.421015 | 1.652430  |
| C | -1.980295 | -0.052285 | 1.674750  |
| N | -1.325338 | -0.581650 | 0.486067  |
| C | -3.593216 | -1.929726 | 1.498073  |
| H | -0.511770 | -3.761688 | -2.365527 |
| H | -2.148179 | -3.169371 | -2.647315 |
| H | -1.165677 | -4.718021 | -0.195479 |
| H | -2.324823 | -5.295043 | -1.396693 |
| H | -3.997308 | -3.679146 | -0.724287 |
| H | -3.373060 | -4.395019 | 0.760819  |
| H | -4.626439 | -2.199391 | 1.258991  |
| H | -3.334953 | -2.439172 | 2.435158  |
| H | -3.946203 | 0.088802  | 0.817179  |
| H | -3.952478 | -0.101898 | 2.572494  |
| H | -1.506171 | -0.442704 | 2.585189  |
| H | -1.839490 | 1.028869  | 1.670058  |
| H | -0.216988 | -1.638264 | -1.509679 |

62 atoms

7-isomer, structure I2 in toluene

|   |          |           |           |
|---|----------|-----------|-----------|
| O | 0.819027 | -0.919218 | -2.166604 |
| O | 1.739037 | -1.119978 | -0.132544 |
| C | 1.604397 | -0.278377 | -1.254079 |
| C | 2.942066 | 0.091432  | -1.917455 |
| H | 3.369249 | 0.967817  | -1.419792 |
| H | 2.710305 | 0.390067  | -2.941446 |
| C | 3.970712 | -1.050837 | -1.928088 |
| H | 3.465369 | -1.993254 | -2.161135 |

|   |           |           |           |
|---|-----------|-----------|-----------|
| H | 4.675228  | -0.869706 | -2.746759 |
| C | 4.778190  | -1.174673 | -0.625881 |
| H | 5.261088  | -0.209178 | -0.424283 |
| H | 5.594223  | -1.889694 | -0.779165 |
| C | 3.984736  | -1.606815 | 0.614069  |
| H | 3.679198  | -2.655315 | 0.515960  |
| H | 4.633935  | -1.546993 | 1.493950  |
| C | 2.716710  | -0.790301 | 0.865484  |
| H | 2.928001  | 0.282808  | 0.838603  |
| C | 2.046563  | -1.113809 | 2.215072  |
| H | 1.088921  | -0.586063 | 2.246651  |
| C | 2.849862  | -0.745718 | 3.376866  |
| H | 1.812729  | -2.184175 | 2.242818  |
| C | 3.510714  | -0.424953 | 4.329463  |
| H | 4.094992  | -0.147242 | 5.174832  |
| O | 0.935646  | 0.900886  | -0.716145 |
| C | 0.581343  | 1.910322  | -1.672088 |
| C | -0.145211 | 3.022632  | -0.957881 |
| H | -0.045586 | 1.474266  | -2.454066 |
| H | 1.487946  | 2.303468  | -2.147368 |
| C | 0.500216  | 3.764382  | 0.038681  |
| C | -1.468593 | 3.334612  | -1.276612 |
| C | -0.161613 | 4.796747  | 0.697024  |
| H | 1.527250  | 3.527849  | 0.298910  |
| C | -2.133636 | 4.372953  | -0.623587 |
| H | -1.984576 | 2.758954  | -2.038923 |
| H | 0.352463  | 5.364623  | 1.466157  |
| C | -1.481815 | 5.105802  | 0.365277  |
| H | -3.160715 | 4.605792  | -0.886529 |
| H | -1.996923 | 5.913898  | 0.874929  |
| H | -0.852579 | 0.195675  | 0.049568  |
| N | -3.350789 | -1.834793 | 0.379063  |
| C | -2.198925 | -1.299607 | -0.153648 |
| N | -1.518704 | -1.826202 | -1.131654 |
| C | -2.019820 | -3.047879 | -1.740532 |
| C | -2.709122 | -3.950043 | -0.719211 |
| C | -3.814867 | -3.162208 | -0.028233 |
| C | -3.785627 | 0.259749  | 1.635199  |
| C | -2.274856 | 0.446585  | 1.609076  |
| N | -1.769346 | -0.102868 | 0.364890  |
| C | -4.106928 | -1.220036 | 1.470389  |
| H | -1.176492 | -3.569013 | -2.203130 |
| H | -2.722348 | -2.815294 | -2.556692 |
| H | -1.973071 | -4.282110 | 0.020341  |
| H | -3.130631 | -4.843026 | -1.190208 |
| H | -4.686100 | -3.060126 | -0.690101 |
| H | -4.158265 | -3.691128 | 0.868099  |

|   |           |           |           |
|---|-----------|-----------|-----------|
| H | -5.174199 | -1.355490 | 1.261834  |
| H | -3.898636 | -1.756272 | 2.408450  |
| H | -4.231214 | 0.836534  | 0.819400  |
| H | -4.210405 | 0.622943  | 2.574718  |
| H | -1.822611 | -0.035247 | 2.490497  |
| H | -2.007987 | 1.504588  | 1.643930  |
| H | -0.033361 | -1.246194 | -1.729626 |

62 atoms

7-isomer, structure TS23 in toluene

|   |           |           |           |
|---|-----------|-----------|-----------|
| O | 0.622025  | -0.526791 | -2.186056 |
| O | 1.435315  | -1.231456 | -0.209402 |
| C | 1.561457  | -0.254099 | -1.231393 |
| C | 2.940939  | -0.230938 | -1.909352 |
| H | 3.634151  | 0.363830  | -1.306678 |
| H | 2.806302  | 0.303522  | -2.851992 |
| C | 3.535712  | -1.621489 | -2.179390 |
| H | 2.742112  | -2.295364 | -2.516928 |
| H | 4.243204  | -1.540052 | -3.011408 |
| C | 4.281858  | -2.219111 | -0.977097 |
| H | 5.073168  | -1.519563 | -0.676662 |
| H | 4.796035  | -3.133796 | -1.292821 |
| C | 3.416732  | -2.548767 | 0.245703  |
| H | 2.760221  | -3.398511 | 0.023979  |
| H | 4.068410  | -2.858369 | 1.069254  |
| C | 2.521721  | -1.401293 | 0.717772  |
| H | 3.085626  | -0.467701 | 0.800056  |
| C | 1.862326  | -1.679758 | 2.082596  |
| H | 1.178333  | -0.854383 | 2.300757  |
| C | 2.812434  | -1.817186 | 3.182158  |
| H | 1.250078  | -2.585033 | 1.999342  |
| C | 3.595798  | -1.914142 | 4.089629  |
| H | 4.288512  | -2.002522 | 4.893091  |
| O | 1.293712  | 0.979209  | -0.536312 |
| C | 1.215628  | 2.153216  | -1.347770 |
| C | 0.610305  | 3.279129  | -0.544952 |
| H | 0.600342  | 1.936942  | -2.227969 |
| H | 2.212518  | 2.445631  | -1.699334 |
| C | 1.229389  | 4.529963  | -0.496343 |
| C | -0.596833 | 3.097179  | 0.140437  |
| C | 0.653990  | 5.585734  | 0.211379  |
| H | 2.172375  | 4.682400  | -1.014114 |
| C | -1.169406 | 4.147637  | 0.852110  |
| H | -1.079170 | 2.125759  | 0.121941  |
| H | 1.149378  | 6.551322  | 0.238325  |
| C | -0.547863 | 5.396873  | 0.888439  |

|   |           |           |           |
|---|-----------|-----------|-----------|
| H | -2.106098 | 3.993076  | 1.379238  |
| H | -0.996710 | 6.214772  | 1.443351  |
| H | -0.662416 | -0.403276 | 0.606560  |
| N | -3.732444 | -1.259443 | 0.166785  |
| C | -2.442405 | -0.913837 | -0.159709 |
| N | -1.936302 | -0.954050 | -1.355872 |
| C | -2.798106 | -1.354288 | -2.457906 |
| C | -3.832161 | -2.391181 | -2.024558 |
| C | -4.620329 | -1.844411 | -0.840782 |
| C | -3.440165 | -0.353939 | 2.459543  |
| C | -1.963828 | -0.666890 | 2.259428  |
| N | -1.641694 | -0.439731 | 0.860387  |
| C | -4.268591 | -1.229875 | 1.528457  |
| H | -2.167410 | -1.754288 | -3.257062 |
| H | -3.311447 | -0.477222 | -2.881486 |
| H | -3.317283 | -3.312211 | -1.731730 |
| H | -4.516516 | -2.640724 | -2.840632 |
| H | -5.344899 | -1.089427 | -1.174997 |
| H | -5.193912 | -2.645008 | -0.361119 |
| H | -5.299320 | -0.861718 | 1.480050  |
| H | -4.317995 | -2.255743 | 1.922745  |
| H | -3.614171 | 0.703068  | 2.238212  |
| H | -3.742203 | -0.534178 | 3.494371  |
| H | -1.750628 | -1.700198 | 2.574843  |
| H | -1.339513 | -0.005843 | 2.864271  |
| H | -0.288013 | -0.671509 | -1.780794 |

62 atoms

7-isomer, structure I3 in toluene

|   |          |           |           |
|---|----------|-----------|-----------|
| O | 0.281730 | -0.124845 | -2.068506 |
| O | 0.817766 | -1.527243 | -0.390441 |
| C | 1.317298 | -0.525402 | -1.271827 |
| C | 2.459401 | -1.039284 | -2.168435 |
| H | 3.413888 | -0.902102 | -1.650927 |
| H | 2.480670 | -0.386674 | -3.043760 |
| C | 2.316196 | -2.505721 | -2.606396 |
| H | 1.271952 | -2.711504 | -2.861691 |
| H | 2.890304 | -2.646687 | -3.528350 |
| C | 2.832787 | -3.517797 | -1.569609 |
| H | 3.877358 | -3.271492 | -1.337855 |
| H | 2.855511 | -4.514390 | -2.024498 |
| C | 2.038188 | -3.604945 | -0.259091 |
| H | 1.063902 | -4.074188 | -0.442391 |
| H | 2.573645 | -4.253517 | 0.442242  |
| C | 1.773181 | -2.253848 | 0.404118  |
| H | 2.691243 | -1.667205 | 0.487427  |

|   |           |           |           |
|---|-----------|-----------|-----------|
| C | 1.161059  | -2.370999 | 1.813298  |
| H | 0.871798  | -1.366834 | 2.135763  |
| C | 2.063350  | -2.965878 | 2.794344  |
| H | 0.239170  | -2.962017 | 1.756045  |
| C | 2.816143  | -3.447964 | 3.599019  |
| H | 3.480165  | -3.871798 | 4.314962  |
| O | 1.761528  | 0.510149  | -0.386892 |
| C | 2.219882  | 1.713849  | -0.998296 |
| C | 2.108293  | 2.851792  | -0.010985 |
| H | 1.607583  | 1.923236  | -1.882477 |
| H | 3.260634  | 1.607577  | -1.330001 |
| C | 3.116314  | 3.813976  | 0.080691  |
| C | 0.975647  | 2.979102  | 0.800862  |
| C | 2.995145  | 4.892625  | 0.956768  |
| H | 4.007013  | 3.719740  | -0.534716 |
| C | 0.856735  | 4.051634  | 1.681036  |
| H | 0.196126  | 2.227644  | 0.739208  |
| H | 3.788756  | 5.630931  | 1.017113  |
| C | 1.864390  | 5.013717  | 1.760861  |
| H | -0.025070 | 4.137129  | 2.308824  |
| H | 1.770237  | 5.848109  | 2.448823  |
| H | -1.205336 | -1.395272 | 0.057966  |
| N | -4.047561 | 0.141447  | 0.124562  |
| C | -2.713660 | -0.071631 | -0.131824 |
| N | -1.933045 | 0.757367  | -0.767576 |
| C | -2.490221 | 2.033634  | -1.189591 |
| C | -3.953753 | 1.901419  | -1.606146 |
| C | -4.744462 | 1.291972  | -0.455064 |
| C | -4.108354 | -1.834552 | 1.632056  |
| C | -2.973513 | -2.362309 | 0.763525  |
| N | -2.162210 | -1.232451 | 0.351076  |
| C | -4.905259 | -0.804483 | 0.840634  |
| H | -1.888020 | 2.411882  | -2.020466 |
| H | -2.403813 | 2.780002  | -0.384818 |
| H | -4.019494 | 1.252725  | -2.485839 |
| H | -4.384792 | 2.869803  | -1.876768 |
| H | -4.925216 | 2.041615  | 0.327344  |
| H | -5.726994 | 0.953243  | -0.802580 |
| H | -5.557985 | -0.233806 | 1.510955  |
| H | -5.561823 | -1.312700 | 0.119135  |
| H | -3.684393 | -1.377002 | 2.530461  |
| H | -4.772846 | -2.642946 | 1.947998  |
| H | -3.380038 | -2.919328 | -0.094968 |
| H | -2.340011 | -3.052104 | 1.325420  |
| H | -0.501333 | 0.195478  | -1.516977 |

62 atoms

7-isomer, structure TSr in toluene

|   |           |           |           |
|---|-----------|-----------|-----------|
| O | 0.268893  | -0.150447 | -2.234457 |
| O | 1.122523  | -1.047754 | -0.362305 |
| C | 1.437429  | -0.311947 | -1.552914 |
| C | 2.449812  | -1.046939 | -2.446293 |
| H | 3.459742  | -0.765874 | -2.136859 |
| H | 2.307354  | -0.634628 | -3.448441 |
| C | 2.309395  | -2.575863 | -2.463018 |
| H | 1.249354  | -2.848954 | -2.491644 |
| H | 2.745903  | -2.953834 | -3.393854 |
| C | 3.021568  | -3.274258 | -1.291523 |
| H | 4.076213  | -2.969394 | -1.300035 |
| H | 3.022836  | -4.356071 | -1.466567 |
| C | 2.441154  | -3.014396 | 0.106273  |
| H | 1.474226  | -3.522484 | 0.210339  |
| H | 3.107696  | -3.452419 | 0.856456  |
| C | 2.217738  | -1.536804 | 0.430911  |
| H | 3.111789  | -0.947210 | 0.214039  |
| C | 1.829147  | -1.277913 | 1.899956  |
| H | 1.591367  | -0.214749 | 1.998019  |
| C | 2.870969  | -1.639492 | 2.856283  |
| H | 0.908011  | -1.825916 | 2.130811  |
| C | 3.737773  | -1.928939 | 3.638345  |
| H | 4.503302  | -2.181735 | 4.333450  |
| O | 2.058830  | 0.912245  | -1.122390 |
| C | 1.513278  | 2.183691  | -1.481501 |
| C | 1.331849  | 3.051356  | -0.256882 |
| H | 0.565047  | 2.043788  | -2.001445 |
| H | 2.206379  | 2.667103  | -2.179321 |
| C | 2.118405  | 4.188149  | -0.062849 |
| C | 0.372305  | 2.722773  | 0.709584  |
| C | 1.952841  | 4.989036  | 1.068198  |
| H | 2.871133  | 4.450069  | -0.801449 |
| C | 0.206873  | 3.517755  | 1.840162  |
| H | -0.249477 | 1.844654  | 0.562990  |
| H | 2.573921  | 5.869174  | 1.203371  |
| C | 0.997102  | 4.654407  | 2.023479  |
| H | -0.542654 | 3.253759  | 2.580216  |
| H | 0.866997  | 5.273135  | 2.905921  |
| H | -0.798271 | -1.449431 | 0.151187  |
| N | -3.903088 | -0.563421 | 0.192330  |
| C | -2.561848 | -0.513535 | -0.099543 |
| N | -1.991816 | 0.392353  | -0.847247 |
| C | -2.821914 | 1.470232  | -1.365440 |
| C | -4.231236 | 0.987275  | -1.701703 |
| C | -4.845672 | 0.346135  | -0.463659 |



|   |           |           |           |
|---|-----------|-----------|-----------|
| C | -3.499522 | -2.333067 | 1.892372  |
| C | -2.295788 | -2.697139 | 1.032441  |
| N | -1.760908 | -1.471318 | 0.469259  |
| C | -4.518357 | -1.589413 | 1.036951  |
| H | -2.336557 | 1.878712  | -2.256460 |
| H | -2.879126 | 2.297113  | -0.641010 |
| H | -4.175690 | 0.252227  | -2.511347 |
| H | -4.866628 | 1.809011  | -2.044608 |
| H | -5.166580 | 1.116494  | 0.250550  |
| H | -5.738740 | -0.228692 | -0.733160 |
| H | -5.265257 | -1.103099 | 1.674400  |
| H | -5.063234 | -2.300691 | 0.399266  |
| H | -3.166553 | -1.700766 | 2.720422  |
| H | -3.965572 | -3.225568 | 2.317790  |
| H | -2.589579 | -3.419059 | 0.254814  |
| H | -1.513795 | -3.167933 | 1.632290  |
| H | -0.516706 | 0.054625  | -1.631369 |

62 atoms

7-isomer, structure I3r in toluene

|   |          |           |           |
|---|----------|-----------|-----------|
| O | 0.184796 | -0.052244 | -2.170046 |
| O | 0.924957 | -0.951434 | -0.246614 |
| C | 1.305516 | -0.162579 | -1.392659 |
| C | 2.434587 | -0.795239 | -2.215793 |
| H | 3.396234 | -0.461258 | -1.817079 |
| H | 2.343972 | -0.361120 | -3.213659 |
| C | 2.394517 | -2.327833 | -2.286664 |
| H | 1.360581 | -2.663657 | -2.418359 |
| H | 2.933107 | -2.644037 | -3.186258 |
| C | 3.043910 | -3.023779 | -1.078732 |
| H | 4.071350 | -2.650641 | -0.976994 |
| H | 3.135523 | -4.095259 | -1.289425 |
| C | 2.319846 | -2.858792 | 0.264689  |
| H | 1.382219 | -3.428754 | 0.256933  |
| H | 2.939895 | -3.286829 | 1.059092  |
| C | 1.973643 | -1.412649 | 0.621726  |
| H | 2.844404 | -0.760987 | 0.509194  |
| C | 1.440964 | -1.247799 | 2.059536  |
| H | 1.131798 | -0.206187 | 2.187951  |
| C | 2.412821 | -1.597651 | 3.090865  |
| H | 0.536695 | -1.855640 | 2.178971  |
| C | 3.221938 | -1.876133 | 3.936007  |
| H | 3.936230 | -2.120124 | 4.686625  |
| O | 1.814759 | 1.083240  | -0.938500 |
| C | 0.852276 | 1.997928  | -0.418740 |
| C | 1.555759 | 3.144861  | 0.266480  |

|   |           |           |           |
|---|-----------|-----------|-----------|
| H | 0.181639  | 1.491576  | 0.281714  |
| H | 0.233495  | 2.375450  | -1.241687 |
| C | 2.841341  | 3.544698  | -0.108577 |
| C | 0.895705  | 3.859209  | 1.271510  |
| C | 3.451515  | 4.635683  | 0.507942  |
| H | 3.363424  | 2.989552  | -0.878667 |
| C | 1.501481  | 4.954208  | 1.884187  |
| H | -0.100743 | 3.554487  | 1.580469  |
| H | 4.452509  | 4.931017  | 0.208576  |
| C | 2.783975  | 5.346407  | 1.504012  |
| H | 0.975144  | 5.495215  | 2.664510  |
| H | 3.260767  | 6.195299  | 1.983789  |
| H | -1.002059 | -1.585896 | 0.005665  |
| N | -4.158288 | -0.931157 | -0.184316 |
| C | -2.803646 | -0.764653 | -0.348527 |
| N | -2.242632 | 0.229515  | -0.978561 |
| C | -3.103926 | 1.281399  | -1.497227 |
| C | -4.437496 | 0.726886  | -1.994599 |
| C | -5.106955 | -0.046402 | -0.865046 |
| C | -3.770628 | -2.801600 | 1.408049  |
| C | -2.468406 | -3.006048 | 0.644094  |
| N | -1.983806 | -1.702266 | 0.230078  |
| C | -4.763401 | -2.065753 | 0.516045  |
| H | -2.574487 | 1.788143  | -2.309069 |
| H | -3.289677 | 2.045746  | -0.726197 |
| H | -4.253663 | 0.059710  | -2.843037 |
| H | -5.102195 | 1.524301  | -2.339502 |
| H | -5.550083 | 0.644422  | -0.134929 |
| H | -5.924780 | -0.662390 | -1.255444 |
| H | -5.602464 | -1.690387 | 1.112556  |
| H | -5.188586 | -2.760228 | -0.223458 |
| H | -3.565799 | -2.216792 | 2.309411  |
| H | -4.200982 | -3.757332 | 1.718235  |
| H | -2.632208 | -3.680688 | -0.210564 |
| H | -1.709690 | -3.467714 | 1.279908  |
| H | -0.662106 | 0.065095  | -1.636305 |

62 atoms

7-isomer, structure TS34 in toluene

|   |           |           |          |
|---|-----------|-----------|----------|
| O | -0.137153 | -0.579776 | 2.123342 |
| O | 0.110786  | 1.107713  | 0.287044 |
| C | 0.798609  | 0.198611  | 1.867884 |
| C | 1.113796  | 1.377122  | 2.778914 |
| H | 2.068702  | 1.819121  | 2.486148 |
| H | 1.278532  | 0.920922  | 3.762157 |
| C | 0.023512  | 2.456983  | 2.882919 |

|   |           |           |           |
|---|-----------|-----------|-----------|
| H | -0.950993 | 2.005787  | 2.676388  |
| H | -0.015127 | 2.808474  | 3.920335  |
| C | 0.260104  | 3.690119  | 1.991361  |
| H | 1.285085  | 4.044278  | 2.165671  |
| H | -0.391950 | 4.501280  | 2.338888  |
| C | 0.044068  | 3.518735  | 0.480390  |
| H | -1.031165 | 3.432089  | 0.272603  |
| H | 0.386130  | 4.431252  | -0.022893 |
| C | 0.726689  | 2.281054  | -0.128327 |
| H | 1.789064  | 2.281714  | 0.173699  |
| C | 0.729678  | 2.333101  | -1.686901 |
| H | 1.124422  | 1.374354  | -2.037497 |
| C | 1.504820  | 3.425023  | -2.267647 |
| H | -0.306945 | 2.389518  | -2.042676 |
| C | 2.159306  | 4.327701  | -2.722812 |
| H | 2.737846  | 5.123502  | -3.128632 |
| O | 1.980415  | -0.275023 | 1.327041  |
| C | 1.861168  | -1.464876 | 0.552615  |
| C | 3.191194  | -1.801261 | -0.076148 |
| H | 1.103296  | -1.295866 | -0.220341 |
| H | 1.514540  | -2.289379 | 1.182954  |
| C | 4.091547  | -0.803174 | -0.461347 |
| C | 3.523393  | -3.136460 | -0.324980 |
| C | 5.292511  | -1.134827 | -1.085434 |
| H | 3.850146  | 0.233301  | -0.257727 |
| C | 4.720298  | -3.470228 | -0.956099 |
| H | 2.841268  | -3.924972 | -0.017700 |
| H | 5.982363  | -0.347896 | -1.374591 |
| C | 5.610639  | -2.468502 | -1.338438 |
| H | 4.961932  | -4.512884 | -1.138586 |
| H | 6.546871  | -2.725228 | -1.824064 |
| H | -1.464469 | 0.751659  | -0.031440 |
| N | -3.999132 | -1.229718 | -0.707168 |
| C | -2.830368 | -0.793522 | -0.177362 |
| N | -2.031399 | -1.637755 | 0.486802  |
| C | -2.349337 | -3.047545 | 0.664636  |
| C | -3.860245 | -3.219761 | 0.762945  |
| C | -4.516571 | -2.580315 | -0.453809 |
| C | -4.056529 | 0.817716  | -2.103486 |
| C | -3.303076 | 1.467996  | -0.949092 |
| N | -2.450744 | 0.479555  | -0.305110 |
| C | -4.826650 | -0.388079 | -1.580922 |
| H | -1.850115 | -3.384439 | 1.573738  |
| H | -1.950902 | -3.641446 | -0.167648 |
| H | -4.221668 | -2.743006 | 1.678719  |
| H | -4.130793 | -4.277178 | 0.808228  |
| H | -4.357158 | -3.197956 | -1.346700 |

|   |           |           |           |
|---|-----------|-----------|-----------|
| H | -5.597728 | -2.499083 | -0.307097 |
| H | -5.174869 | -1.010206 | -2.411103 |
| H | -5.715215 | -0.065621 | -1.024072 |
| H | -3.342760 | 0.505391  | -2.871272 |
| H | -4.753333 | 1.522157  | -2.563579 |
| H | -4.008242 | 1.900799  | -0.227964 |
| H | -2.664212 | 2.278921  | -1.300399 |
| H | -1.257344 | -1.230900 | 1.042214  |

62 atoms

7-isomer, structure I4 in toluene

|   |           |           |           |
|---|-----------|-----------|-----------|
| O | 0.419861  | -1.224387 | 2.142431  |
| O | 0.465489  | 1.195523  | -0.065214 |
| C | 1.332925  | -0.433684 | 2.248994  |
| C | 1.247124  | 0.951214  | 2.846591  |
| H | 1.819273  | 1.608484  | 2.191785  |
| H | 1.811415  | 0.921449  | 3.786147  |
| C | -0.184287 | 1.469672  | 3.079898  |
| H | -0.902377 | 0.772631  | 2.643921  |
| H | -0.387977 | 1.467327  | 4.155229  |
| C | -0.453396 | 2.885077  | 2.537079  |
| H | 0.396159  | 3.538922  | 2.774423  |
| H | -1.303926 | 3.301914  | 3.088619  |
| C | -0.786823 | 3.008695  | 1.040036  |
| H | -1.683146 | 2.418855  | 0.811731  |
| H | -1.050303 | 4.055028  | 0.849041  |
| C | 0.311541  | 2.600986  | 0.045265  |
| H | 1.277814  | 2.978198  | 0.397713  |
| C | 0.072683  | 3.212407  | -1.362424 |
| H | 0.801922  | 2.761497  | -2.042981 |
| C | 0.193443  | 4.665972  | -1.410874 |
| H | -0.918325 | 2.911943  | -1.721375 |
| C | 0.310755  | 5.863582  | -1.427233 |
| H | 0.411433  | 6.922971  | -1.450604 |
| O | 2.597038  | -0.701127 | 1.870942  |
| C | 2.869491  | -1.959923 | 1.206647  |
| C | 3.676386  | -1.712401 | -0.041675 |
| H | 1.916384  | -2.441057 | 0.985880  |
| H | 3.418093  | -2.586458 | 1.912894  |
| C | 3.262395  | -0.756744 | -0.978101 |
| C | 4.828127  | -2.460190 | -0.294646 |
| C | 3.993911  | -0.563300 | -2.146807 |
| H | 2.376491  | -0.158127 | -0.786160 |
| C | 5.554924  | -2.270812 | -1.469980 |
| H | 5.163088  | -3.195735 | 0.431610  |
| H | 3.668066  | 0.181936  | -2.865864 |

|   |           |           |           |
|---|-----------|-----------|-----------|
| C | 5.139133  | -1.320338 | -2.398727 |
| H | 6.448552  | -2.859099 | -1.653197 |
| H | 5.705442  | -1.165940 | -3.311797 |
| H | -0.377833 | 0.770612  | -0.380078 |
| N | -3.788958 | -1.419869 | -0.901515 |
| C | -2.623379 | -0.883186 | -0.401888 |
| N | -2.296626 | -1.205523 | 0.897504  |
| C | -2.899870 | -2.336696 | 1.582630  |
| C | -4.401510 | -2.289298 | 1.342516  |
| C | -4.662587 | -2.329460 | -0.157419 |
| C | -2.957629 | -0.795507 | -3.134255 |
| C | -2.213496 | 0.316791  | -2.400058 |
| N | -1.836304 | -0.070670 | -1.048394 |
| C | -4.161641 | -1.214250 | -2.302014 |
| H | -2.663199 | -2.251431 | 2.644768  |
| H | -2.491756 | -3.298306 | 1.233978  |
| H | -4.803979 | -1.367581 | 1.773004  |
| H | -4.905127 | -3.132146 | 1.822953  |
| H | -4.525778 | -3.353779 | -0.534669 |
| H | -5.701223 | -2.052265 | -0.370293 |
| H | -4.581685 | -2.152550 | -2.680682 |
| H | -4.957870 | -0.459834 | -2.367380 |
| H | -2.286959 | -1.650421 | -3.270182 |
| H | -3.285538 | -0.471219 | -4.126228 |
| H | -2.842199 | 1.221689  | -2.384069 |
| H | -1.303905 | 0.587033  | -2.945084 |
| H | -1.336218 | -1.003817 | 1.147176  |

62 atoms

7-isomer, structure I5 in toluene

|   |           |           |           |
|---|-----------|-----------|-----------|
| O | -3.991748 | -1.705050 | -1.647178 |
| O | 3.139900  | 0.794162  | -1.702039 |
| C | -4.078430 | -0.795880 | -0.856257 |
| C | -2.943688 | 0.098866  | -0.404626 |
| H | -2.827631 | -0.038692 | 0.677067  |
| H | -3.266104 | 1.138367  | -0.527883 |
| C | -1.627695 | -0.164342 | -1.134426 |
| H | -1.348219 | -1.215571 | -1.009707 |
| H | -1.776195 | -0.021659 | -2.210254 |
| C | -0.492755 | 0.740449  | -0.642503 |
| H | -0.336910 | 0.579909  | 0.431873  |
| H | -0.792539 | 1.787980  | -0.745605 |
| C | 0.815589  | 0.486605  | -1.396812 |
| H | 1.057927  | -0.581442 | -1.352096 |
| H | 0.685750  | 0.720636  | -2.460770 |
| C | 2.053370  | 1.237943  | -0.902066 |

|   |            |           |           |
|---|------------|-----------|-----------|
| H | 2.238573   | 0.987949  | 0.152871  |
| C | 1.950257   | 2.785705  | -1.015608 |
| H | 2.972110   | 3.179327  | -1.001970 |
| C | 1.192334   | 3.450337  | 0.041384  |
| H | 1.540102   | 3.043741  | -1.998864 |
| C | 0.604170   | 4.007141  | 0.931424  |
| H | 0.072427   | 4.495385  | 1.713591  |
| O | -5.232880  | -0.450080 | -0.247074 |
| C | -6.400620  | -1.247938 | -0.591204 |
| C | -7.572500  | -0.709574 | 0.178808  |
| H | -6.192205  | -2.290004 | -0.342568 |
| H | -6.556273  | -1.184353 | -1.669463 |
| C | -7.867995  | -1.196338 | 1.455615  |
| C | -8.372554  | 0.301933  | -0.360705 |
| C | -8.942346  | -0.684353 | 2.179321  |
| H | -7.252950  | -1.982091 | 1.884601  |
| C | -9.447863  | 0.816656  | 0.359685  |
| H | -8.151958  | 0.687614  | -1.351765 |
| H | -9.163064  | -1.073452 | 3.168055  |
| C | -9.734654  | 0.323714  | 1.631811  |
| H | -10.063079 | 1.599399  | -0.072169 |
| H | -10.574080 | 0.721407  | 2.193019  |
| H | 3.992913   | 0.991088  | -1.225096 |
| N | 6.697813   | -0.928624 | 0.832671  |
| C | 5.691810   | -0.466502 | 0.016970  |
| N | 4.931099   | -1.411525 | -0.632288 |
| C | 4.902515   | -2.806122 | -0.233239 |
| C | 6.335879   | -3.250652 | 0.027643  |
| C | 6.955986   | -2.346972 | 1.086360  |
| C | 6.805912   | 1.359782  | 1.755465  |
| C | 6.305661   | 1.788407  | 0.377009  |
| N | 5.430940   | 0.789354  | -0.215093 |
| C | 7.490379   | 0.003257  | 1.637976  |
| H | 4.454563   | -3.383784 | -1.044460 |
| H | 4.286365   | -2.971052 | 0.664759  |
| H | 6.904129   | -3.185022 | -0.904654 |
| H | 6.369979   | -4.288194 | 0.369951  |
| H | 6.570108   | -2.614936 | 2.081256  |
| H | 8.041176   | -2.494000 | 1.120382  |
| H | 7.631360   | -0.440541 | 2.629907  |
| H | 8.489154   | 0.112919  | 1.193832  |
| H | 5.953714   | 1.286436  | 2.439231  |
| H | 7.503983   | 2.089839  | 2.175550  |
| H | 7.167498   | 1.985595  | -0.279992 |
| H | 5.755352   | 2.731121  | 0.448299  |
| H | 4.136316   | -1.023337 | -1.125779 |

**Table S9:** Cartesian coordinates (in Angstroms) of all intermediates and transition states of the second step of the TBD catalyzed ROP of 3-/7-isomer (i.e. addition of another 3-/7-isomer unit to the 3-/7-isomer chain end) optimized in toluene using the PCM B3LYP/6-311G(d) method

85 atoms

addition of another 3-isomer unit to the 3-isomer chain end,  
structure I1, in toluene

|   |          |           |           |
|---|----------|-----------|-----------|
| N | 3.185703 | 3.642610  | 1.346295  |
| C | 3.391873 | 2.285440  | 1.434800  |
| N | 4.183643 | 1.837480  | 2.458271  |
| C | 4.819982 | 2.700720  | 3.438217  |
| C | 5.143462 | 4.046765  | 2.800779  |
| C | 3.871441 | 4.619581  | 2.190469  |
| C | 1.259882 | 3.108356  | -0.110700 |
| C | 2.126261 | 1.916893  | -0.517637 |
| N | 2.887167 | 1.404591  | 0.612630  |
| C | 2.158665 | 4.198113  | 0.461866  |
| H | 5.723518 | 2.200359  | 3.791057  |
| H | 4.171704 | 2.849503  | 4.313411  |
| H | 5.902849 | 3.910300  | 2.024655  |
| H | 5.542016 | 4.745340  | 3.541388  |
| H | 3.193971 | 4.965756  | 2.985426  |
| H | 4.104696 | 5.494169  | 1.572741  |
| H | 1.567750 | 4.924665  | 1.033095  |
| H | 2.648461 | 4.755161  | -0.348344 |
| H | 0.537655 | 2.782690  | 0.645084  |
| H | 0.693140 | 3.508249  | -0.956845 |
| H | 2.796121 | 2.216194  | -1.339344 |
| H | 1.508460 | 1.103708  | -0.908261 |
| H | 4.521194 | 0.888701  | 2.363748  |
| O | 5.601023 | -0.816548 | 2.189476  |
| C | 5.199909 | -1.854809 | 1.707210  |
| O | 4.796449 | -2.820803 | 2.550697  |
| C | 4.159552 | -4.040605 | 2.096785  |
| H | 3.337981 | -3.783078 | 1.425074  |
| H | 3.732423 | -4.450257 | 3.011667  |
| C | 5.139164 | -5.029885 | 1.479321  |
| H | 6.014941 | -5.098193 | 2.134985  |
| H | 4.666665 | -6.018786 | 1.493403  |
| C | 5.562427 | -4.694907 | 0.046256  |
| H | 4.691439 | -4.788486 | -0.614404 |
| H | 6.285033 | -5.443167 | -0.296326 |
| C | 6.166360 | -3.298811 | -0.140680 |
| H | 7.092263 | -3.200989 | 0.439233  |
| H | 6.451348 | -3.189210 | -1.190210 |
| C | 5.205362 | -2.134706 | 0.208750  |

|   |           |           |           |
|---|-----------|-----------|-----------|
| H | 4.185373  | -2.411286 | -0.073681 |
| C | 5.556097  | -0.830633 | -0.543950 |
| H | 4.877343  | -0.037702 | -0.215736 |
| C | 5.460142  | -0.966337 | -1.995250 |
| H | 6.565312  | -0.508323 | -0.268073 |
| C | 5.374096  | -1.075421 | -3.190588 |
| H | 5.294433  | -1.163921 | -4.248267 |
| O | -0.889195 | -3.118906 | 7.292194  |
| C | -1.343148 | -2.123496 | 6.776472  |
| O | 2.247106  | -1.248849 | 1.106927  |
| C | 1.112336  | -1.267738 | 1.955758  |
| H | 0.655936  | -2.259100 | 1.853437  |
| H | 0.362754  | -0.536611 | 1.615396  |
| C | 1.450232  | -1.004421 | 3.425665  |
| H | 2.194025  | -1.740560 | 3.750799  |
| H | 1.935867  | -0.024816 | 3.505137  |
| C | 0.221698  | -1.053044 | 4.339739  |
| H | -0.274577 | -2.025461 | 4.227151  |
| H | -0.510875 | -0.303552 | 4.013842  |
| C | 0.569473  | -0.813357 | 5.812965  |
| H | 1.256923  | -1.591303 | 6.163837  |
| H | 1.100580  | 0.138696  | 5.909521  |
| C | -0.648988 | -0.770630 | 6.757705  |
| H | -1.362293 | -0.027585 | 6.393509  |
| C | -0.243276 | -0.411247 | 8.210968  |
| H | -1.117569 | -0.497190 | 8.865822  |
| C | 0.309227  | 0.933713  | 8.341659  |
| H | 0.478998  | -1.150690 | 8.570313  |
| C | 0.750542  | 2.047477  | 8.447416  |
| H | 1.145589  | 3.030540  | 8.550228  |
| O | -2.528126 | -2.088521 | 6.138892  |
| C | -3.260945 | -3.348790 | 6.078267  |
| C | -4.551192 | -3.099346 | 5.352240  |
| H | -3.424232 | -3.697394 | 7.099177  |
| H | -2.637321 | -4.083227 | 5.566416  |
| C | -4.638573 | -3.291810 | 3.970565  |
| C | -5.679186 | -2.649787 | 6.045617  |
| C | -5.830109 | -3.041775 | 3.293438  |
| H | -3.768581 | -3.640405 | 3.421833  |
| C | -6.871671 | -2.397682 | 5.372110  |
| H | -5.622382 | -2.497265 | 7.119470  |
| H | -5.885700 | -3.198240 | 2.221073  |
| C | -6.948961 | -2.593875 | 3.993745  |
| H | -7.740913 | -2.051986 | 5.922129  |
| H | -7.878631 | -2.401181 | 3.468134  |
| H | 2.529911  | -0.305769 | 0.975742  |



85 atoms

addition of another 3-isomer unit to the 3-isomer chain end,  
structure TS12, in toluene

|   |          |           |           |
|---|----------|-----------|-----------|
| N | 4.276591 | -3.224355 | -1.206307 |
| C | 3.658272 | -2.132347 | -0.686239 |
| N | 3.470986 | -2.031714 | 0.635474  |
| C | 4.034264 | -2.983213 | 1.580897  |
| C | 3.993011 | -4.377096 | 0.970494  |
| C | 4.705712 | -4.356246 | -0.375515 |
| C | 4.561910 | -1.987095 | -3.333104 |
| C | 3.299386 | -1.236187 | -2.931989 |
| N | 3.219476 | -1.155555 | -1.481631 |
| C | 4.577398 | -3.342410 | -2.638321 |
| H | 3.440609 | -2.930699 | 2.494478  |
| H | 5.064232 | -2.708591 | 1.844599  |
| H | 2.951607 | -4.685012 | 0.839110  |
| H | 4.475548 | -5.105031 | 1.626721  |
| H | 5.793030 | -4.305606 | -0.234949 |
| H | 4.495704 | -5.274104 | -0.932788 |
| H | 5.563055 | -3.807854 | -2.731470 |
| H | 3.853534 | -4.023420 | -3.103730 |
| H | 5.441107 | -1.406085 | -3.039355 |
| H | 4.603752 | -2.130980 | -4.415245 |
| H | 2.412530 | -1.736914 | -3.343161 |
| H | 3.300586 | -0.215694 | -3.317706 |
| H | 3.070244 | -1.156801 | 1.026306  |
| O | 2.395703 | 0.238584  | 1.812002  |
| C | 2.695134 | 1.221235  | 1.104556  |
| O | 3.995944 | 1.181917  | 0.602165  |
| C | 4.463470 | 2.223733  | -0.266071 |
| H | 3.635033 | 2.609346  | -0.863187 |
| H | 5.163649 | 1.735152  | -0.949253 |
| C | 5.179048 | 3.316786  | 0.520317  |
| H | 5.921112 | 2.831734  | 1.165742  |
| H | 5.740363 | 3.946729  | -0.181306 |
| C | 4.246662 | 4.195064  | 1.361485  |
| H | 3.665495 | 4.845607  | 0.694988  |
| H | 4.854303 | 4.864848  | 1.980861  |
| C | 3.266453 | 3.431863  | 2.263979  |
| H | 3.809383 | 2.764053  | 2.943128  |
| H | 2.758081 | 4.166071  | 2.896681  |
| C | 2.185852 | 2.628573  | 1.500415  |
| H | 1.921243 | 3.173915  | 0.593575  |
| C | 0.907846 | 2.477442  | 2.359033  |
| H | 0.220104 | 1.779967  | 1.878325  |
| C | 0.214013 | 3.742543  | 2.592640  |

|   |           |           |           |
|---|-----------|-----------|-----------|
| H | 1.173821  | 2.014923  | 3.314338  |
| C | -0.362130 | 4.784288  | 2.771780  |
| H | -0.878817 | 5.700729  | 2.932686  |
| O | -5.308439 | 1.997566  | 0.514672  |
| C | -4.932882 | 1.149800  | -0.261682 |
| O | 1.860771  | 0.965538  | -0.573318 |
| C | 0.550828  | 0.477610  | -0.540872 |
| H | 0.298096  | 0.119906  | 0.472356  |
| H | 0.466015  | -0.415788 | -1.189978 |
| C | -0.487071 | 1.503295  | -1.016472 |
| H | -0.435157 | 2.394592  | -0.380379 |
| H | -0.204805 | 1.832458  | -2.024300 |
| C | -1.918244 | 0.956605  | -1.027293 |
| H | -2.191166 | 0.636527  | -0.014337 |
| H | -1.960698 | 0.051385  | -1.647157 |
| C | -2.940406 | 1.971266  | -1.551082 |
| H | -2.941384 | 2.863967  | -0.915214 |
| H | -2.639740 | 2.301226  | -2.550625 |
| C | -4.385400 | 1.435674  | -1.650824 |
| H | -4.381985 | 0.499791  | -2.214898 |
| C | -5.330318 | 2.446097  | -2.350653 |
| H | -6.361035 | 2.078077  | -2.299804 |
| C | -4.986225 | 2.686707  | -3.748954 |
| H | -5.318240 | 3.387751  | -1.793459 |
| C | -4.706735 | 2.871863  | -4.904034 |
| H | -4.463318 | 3.044511  | -5.925798 |
| O | -4.939704 | -0.168220 | 0.014838  |
| C | -5.407944 | -0.538483 | 1.345806  |
| C | -5.357206 | -2.035148 | 1.455243  |
| H | -6.420748 | -0.151956 | 1.470006  |
| H | -4.767843 | -0.051264 | 2.082658  |
| C | -4.235198 | -2.671541 | 1.993381  |
| C | -6.425508 | -2.815447 | 1.001985  |
| C | -4.181280 | -4.061132 | 2.079458  |
| H | -3.399643 | -2.075530 | 2.348168  |
| C | -6.374524 | -4.204505 | 1.084798  |
| H | -7.302553 | -2.330896 | 0.582828  |
| H | -3.305834 | -4.542440 | 2.503236  |
| C | -5.251222 | -4.830005 | 1.624821  |
| H | -7.211612 | -4.798542 | 0.732488  |
| H | -5.211997 | -5.912372 | 1.694047  |
| H | 2.747113  | -0.300547 | -1.063044 |

85 atoms

addition of another 3-isomer unit to the 3-isomer chain end,  
structure I2, in toluene

|   |           |           |           |
|---|-----------|-----------|-----------|
| N | 1.406565  | -4.588084 | 1.198072  |
| C | 1.828962  | -3.277450 | 1.226791  |
| N | 2.318495  | -2.678808 | 2.276522  |
| C | 2.499145  | -3.462919 | 3.488313  |
| C | 1.386409  | -4.493520 | 3.665230  |
| C | 1.331908  | -5.379710 | 2.427338  |
| C | 1.260275  | -4.521690 | -1.279124 |
| C | 0.996706  | -3.032525 | -1.098539 |
| N | 1.747988  | -2.573186 | 0.053274  |
| C | 0.882675  | -5.251350 | 0.003703  |
| H | 2.523316  | -2.776549 | 4.339887  |
| H | 3.474578  | -3.974463 | 3.478786  |
| H | 0.431437  | -3.972506 | 3.791360  |
| H | 1.545911  | -5.111049 | 4.554095  |
| H | 2.151696  | -6.111074 | 2.441914  |
| H | 0.397227  | -5.951993 | 2.406913  |
| H | 1.272424  | -6.275429 | -0.014619 |
| H | -0.211933 | -5.332409 | 0.081128  |
| H | 2.320692  | -4.672664 | -1.501173 |
| H | 0.680595  | -4.926594 | -2.112848 |
| H | -0.084663 | -2.853751 | -0.988261 |
| H | 1.329648  | -2.465388 | -1.970305 |
| H | 2.910602  | -1.087413 | 2.343005  |
| O | 3.186216  | -0.120355 | 2.475820  |
| C | 3.289955  | 0.499269  | 1.269135  |
| O | 4.159346  | -0.268547 | 0.469960  |
| C | 4.526655  | 0.228009  | -0.825293 |
| H | 3.763655  | 0.913946  | -1.203597 |
| H | 4.539423  | -0.643685 | -1.484905 |
| C | 5.905160  | 0.873875  | -0.772106 |
| H | 6.598704  | 0.140866  | -0.344376 |
| H | 6.247714  | 1.068764  | -1.796062 |
| C | 5.949341  | 2.170098  | 0.043667  |
| H | 5.445686  | 2.970142  | -0.514683 |
| H | 6.993605  | 2.486831  | 0.142739  |
| C | 5.323250  | 2.087488  | 1.445329  |
| H | 5.758595  | 1.258852  | 2.013226  |
| H | 5.591547  | 3.004327  | 1.978920  |
| C | 3.783366  | 1.965598  | 1.463132  |
| H | 3.382027  | 2.545949  | 0.627492  |
| C | 3.218493  | 2.572916  | 2.774536  |
| H | 2.161169  | 2.329520  | 2.892372  |
| C | 3.368130  | 4.025514  | 2.841336  |
| H | 3.722516  | 2.106391  | 3.625396  |
| C | 3.477718  | 5.223187  | 2.883336  |
| H | 3.572938  | 6.282362  | 2.928741  |
| O | -2.734845 | 5.142031  | 3.495243  |

|   |           |           |           |
|---|-----------|-----------|-----------|
| C | -3.133796 | 4.106704  | 3.014603  |
| O | 2.033930  | 0.449711  | 0.525221  |
| C | 0.798398  | 0.722258  | 1.197040  |
| H | 0.949200  | 0.686533  | 2.278015  |
| H | 0.124463  | -0.105385 | 0.948647  |
| C | 0.173074  | 2.040295  | 0.746683  |
| H | 0.847739  | 2.872336  | 0.974835  |
| H | 0.066248  | 2.020344  | -0.344016 |
| C | -1.190633 | 2.284599  | 1.402446  |
| H | -1.069488 | 2.307146  | 2.491902  |
| H | -1.856535 | 1.437907  | 1.193250  |
| C | -1.854764 | 3.578397  | 0.919380  |
| H | -1.210668 | 4.436423  | 1.142763  |
| H | -1.962487 | 3.543291  | -0.169266 |
| C | -3.251720 | 3.840491  | 1.521710  |
| H | -3.874907 | 2.954051  | 1.381277  |
| C | -3.946623 | 5.058443  | 0.860757  |
| H | -4.882348 | 5.274243  | 1.388099  |
| C | -4.240386 | 4.857719  | -0.555118 |
| H | -3.315048 | 5.942181  | 0.992627  |
| C | -4.492083 | 4.681674  | -1.717920 |
| H | -4.715952 | 4.536622  | -2.748471 |
| O | -3.513142 | 3.042317  | 3.746080  |
| C | -3.400862 | 3.188765  | 5.194127  |
| C | -3.863988 | 1.908654  | 5.827287  |
| H | -4.010807 | 4.041427  | 5.496694  |
| H | -2.361493 | 3.414110  | 5.436648  |
| C | -2.945866 | 0.913499  | 6.173694  |
| C | -5.224315 | 1.686768  | 6.064038  |
| C | -3.376908 | -0.280704 | 6.747693  |
| H | -1.886853 | 1.075414  | 5.995824  |
| C | -5.659023 | 0.493911  | 6.635686  |
| H | -5.946148 | 2.454091  | 5.799872  |
| H | -2.653108 | -1.043315 | 7.016141  |
| C | -4.734814 | -0.492327 | 6.979293  |
| H | -6.717028 | 0.335195  | 6.817500  |
| H | -5.071991 | -1.420521 | 7.429300  |
| H | 1.996611  | -1.592389 | 0.119040  |

85 atoms

addition of another 3-isomer unit to the 3-isomer chain end,  
structure TS23, in toluene

|   |          |           |          |
|---|----------|-----------|----------|
| N | 1.200672 | -4.349107 | 1.166634 |
| C | 1.753315 | -3.088055 | 1.185308 |
| N | 2.250276 | -2.511157 | 2.243695 |
| C | 2.291716 | -3.275615 | 3.480606 |

|   |           |           |           |
|---|-----------|-----------|-----------|
| C | 1.067558  | -4.176773 | 3.626910  |
| C | 0.976101  | -5.088961 | 2.410114  |
| C | 1.191956  | -4.344515 | -1.315611 |
| C | 1.075340  | -2.830736 | -1.191160 |
| N | 1.799201  | -2.413634 | -0.006574 |
| C | 0.670344  | -4.989027 | -0.037647 |
| H | 2.350655  | -2.571989 | 4.316143  |
| H | 3.206028  | -3.887865 | 3.529510  |
| H | 0.169628  | -3.553435 | 3.692652  |
| H | 1.117626  | -4.781275 | 4.537358  |
| H | 1.707479  | -5.905247 | 2.486059  |
| H | -0.014424 | -5.555179 | 2.354646  |
| H | 0.946519  | -6.049058 | -0.008250 |
| H | -0.429115 | -4.949278 | -0.019207 |
| H | 2.241327  | -4.611224 | -1.471698 |
| H | 0.619575  | -4.714804 | -2.170179 |
| H | 0.014506  | -2.537616 | -1.153213 |
| H | 1.517130  | -2.329511 | -2.054759 |
| H | 2.937537  | -0.961593 | 2.313489  |
| O | 3.272739  | -0.012958 | 2.445698  |
| C | 3.410225  | 0.605200  | 1.241470  |
| O | 4.179367  | -0.246795 | 0.415645  |
| C | 4.652793  | 0.246782  | -0.845353 |
| H | 3.997527  | 1.038034  | -1.220806 |
| H | 4.578442  | -0.595107 | -1.538864 |
| C | 6.102541  | 0.702292  | -0.725614 |
| H | 6.672957  | -0.129887 | -0.297603 |
| H | 6.505908  | 0.873466  | -1.731509 |
| C | 6.296336  | 1.960654  | 0.127876  |
| H | 5.937493  | 2.836358  | -0.428600 |
| H | 7.370020  | 2.120772  | 0.276990  |
| C | 5.601194  | 1.942043  | 1.499072  |
| H | 5.903827  | 1.061625  | 2.075093  |
| H | 5.952785  | 2.814400  | 2.057966  |
| C | 4.060126  | 2.004838  | 1.429701  |
| H | 3.773616  | 2.600437  | 0.558218  |
| C | 3.478011  | 2.711378  | 2.680470  |
| H | 2.388184  | 2.637422  | 2.686538  |
| C | 3.840284  | 4.125321  | 2.760974  |
| H | 3.819052  | 2.187175  | 3.577347  |
| C | 4.128493  | 5.292331  | 2.816030  |
| H | 4.380817  | 6.324899  | 2.871458  |
| O | -2.960768 | 4.988998  | 3.424984  |
| C | -3.303997 | 3.914720  | 2.988725  |
| O | 2.148515  | 0.722135  | 0.525339  |
| C | 0.921280  | 0.874450  | 1.248137  |
| H | 1.119323  | 0.935134  | 2.319425  |

|   |           |           |           |
|---|-----------|-----------|-----------|
| H | 0.327819  | -0.034216 | 1.090510  |
| C | 0.151740  | 2.090732  | 0.743829  |
| H | 0.749815  | 2.994712  | 0.906541  |
| H | 0.022867  | 1.998639  | -0.340801 |
| C | -1.214792 | 2.237573  | 1.421909  |
| H | -1.073252 | 2.330231  | 2.505403  |
| H | -1.798922 | 1.320629  | 1.273737  |
| C | -2.011898 | 3.433874  | 0.891157  |
| H | -1.453892 | 4.361421  | 1.062217  |
| H | -2.131394 | 3.336037  | -0.192403 |
| C | -3.418072 | 3.584717  | 1.508353  |
| H | -3.957536 | 2.639717  | 1.410040  |
| C | -4.235050 | 4.707607  | 0.818539  |
| H | -5.179574 | 4.852543  | 1.354476  |
| C | -4.528719 | 4.429487  | -0.584214 |
| H | -3.688160 | 5.651112  | 0.908618  |
| C | -4.779385 | 4.188802  | -1.735593 |
| H | -5.003001 | 3.986487  | -2.756509 |
| O | -3.618580 | 2.860601  | 3.764261  |
| C | -3.507693 | 3.070416  | 5.204667  |
| C | -3.908674 | 1.796811  | 5.891005  |
| H | -4.155001 | 3.905598  | 5.476512  |
| H | -2.478710 | 3.352815  | 5.431612  |
| C | -2.945537 | 0.852976  | 6.258344  |
| C | -5.255261 | 1.528446  | 6.156291  |
| C | -3.319052 | -0.336484 | 6.880384  |
| H | -1.896688 | 1.051567  | 6.058674  |
| C | -5.632510 | 0.340122  | 6.776266  |
| H | -6.011744 | 2.255819  | 5.876413  |
| H | -2.560857 | -1.058919 | 7.164594  |
| C | -4.663818 | -0.594812 | 7.139976  |
| H | -6.680470 | 0.145186  | 6.979754  |
| H | -4.956224 | -1.519293 | 7.627392  |
| H | 2.181084  | -1.477715 | 0.038618  |

85 atoms

addition of another 3-isomer unit to the 3-isomer chain end,  
structure I3, in toluene

|   |          |           |           |
|---|----------|-----------|-----------|
| N | 3.010361 | -3.614225 | -2.361896 |
| C | 3.183865 | -2.346353 | -2.866059 |
| N | 3.964737 | -1.439111 | -2.350569 |
| C | 4.776454 | -1.809583 | -1.202039 |
| C | 4.038159 | -2.775448 | -0.277520 |
| C | 3.602205 | -3.996791 | -1.078076 |
| C | 1.780730 | -4.294556 | -4.408905 |
| C | 1.403075 | -2.823144 | -4.523498 |

|   |           |           |           |
|---|-----------|-----------|-----------|
| N | 2.508304  | -2.031678 | -4.017904 |
| C | 2.120829  | -4.611838 | -2.957877 |
| H | 5.048322  | -0.895813 | -0.665823 |
| H | 5.724076  | -2.266380 | -1.528176 |
| H | 3.159385  | -2.273867 | 0.140701  |
| H | 4.667865  | -3.091064 | 0.559746  |
| H | 4.455353  | -4.665991 | -1.254730 |
| H | 2.856624  | -4.573011 | -0.518621 |
| H | 2.612164  | -5.588839 | -2.889892 |
| H | 1.198533  | -4.680491 | -2.362040 |
| H | 2.644276  | -4.491946 | -5.050669 |
| H | 0.961523  | -4.938226 | -4.739845 |
| H | 0.467146  | -2.631040 | -3.975342 |
| H | 1.230983  | -2.544147 | -5.565430 |
| H | 4.209802  | 0.132153  | -2.974292 |
| O | 4.513652  | 1.055899  | -3.246647 |
| C | 3.544378  | 1.805946  | -3.851450 |
| O | 2.760883  | 0.895065  | -4.640882 |
| C | 1.836787  | 1.443243  | -5.591001 |
| H | 1.500974  | 2.430735  | -5.262245 |
| H | 0.963446  | 0.784667  | -5.576509 |
| C | 2.455014  | 1.470051  | -6.985502 |
| H | 2.816949  | 0.458811  | -7.205377 |
| H | 1.665246  | 1.683082  | -7.716700 |
| C | 3.597212  | 2.479367  | -7.157575 |
| H | 3.180599  | 3.494102  | -7.196038 |
| H | 4.065313  | 2.311294  | -8.133901 |
| C | 4.682988  | 2.445963  | -6.068853 |
| H | 5.107953  | 1.441380  | -5.973526 |
| H | 5.498739  | 3.098314  | -6.394428 |
| C | 4.196114  | 2.930815  | -4.691164 |
| H | 3.428763  | 3.696291  | -4.836694 |
| C | 5.327702  | 3.583952  | -3.860060 |
| H | 4.955809  | 3.779872  | -2.850691 |
| C | 5.819280  | 4.831478  | -4.440164 |
| H | 6.150648  | 2.872630  | -3.751599 |
| C | 6.213382  | 5.861694  | -4.921744 |
| H | 6.566904  | 6.774517  | -5.339528 |
| O | 0.039732  | 2.461571  | 3.705681  |
| C | -0.428176 | 1.615774  | 2.979468  |
| O | 2.688220  | 2.480181  | -2.940221 |
| C | 2.127971  | 1.687141  | -1.891649 |
| H | 2.919749  | 1.371491  | -1.203931 |
| H | 1.670438  | 0.783996  | -2.310023 |
| C | 1.087642  | 2.531396  | -1.171221 |
| H | 1.565803  | 3.448320  | -0.808869 |
| H | 0.325078  | 2.843925  | -1.893733 |

|   |           |           |           |
|---|-----------|-----------|-----------|
| C | 0.427782  | 1.788261  | -0.005117 |
| H | 1.197575  | 1.486885  | 0.715553  |
| H | -0.024555 | 0.857544  | -0.370115 |
| C | -0.645560 | 2.631071  | 0.692258  |
| H | -0.198547 | 3.546906  | 1.094891  |
| H | -1.392409 | 2.944882  | -0.043690 |
| C | -1.384367 | 1.901768  | 1.831952  |
| H | -1.769338 | 0.948472  | 1.462402  |
| C | -2.566035 | 2.741096  | 2.385932  |
| H | -2.992386 | 2.237557  | 3.260723  |
| C | -3.626954 | 2.961072  | 1.407594  |
| H | -2.181523 | 3.700547  | 2.745371  |
| C | -4.504356 | 3.129090  | 0.602446  |
| H | -5.283927 | 3.286460  | -0.105195 |
| O | -0.156322 | 0.301780  | 3.094260  |
| C | 0.750753  | -0.069566 | 4.173291  |
| C | 0.872132  | -1.566658 | 4.191309  |
| H | 0.340302  | 0.320235  | 5.106783  |
| H | 1.712775  | 0.415088  | 4.002020  |
| C | 2.058421  | -2.190754 | 3.799601  |
| C | -0.204532 | -2.358467 | 4.606604  |
| C | 2.172293  | -3.580583 | 3.826478  |
| H | 2.900822  | -1.586927 | 3.475521  |
| C | -0.096759 | -3.745489 | 4.627608  |
| H | -1.131653 | -1.883758 | 4.913694  |
| H | 3.102783  | -4.051815 | 3.526932  |
| C | 1.094404  | -4.360041 | 4.239069  |
| H | -0.938468 | -4.348192 | 4.953040  |
| H | 1.181103  | -5.441543 | 4.262182  |
| H | 2.592482  | -1.059094 | -4.294065 |

85 atoms

addition of another 3-isomer unit to the 3-isomer chain end,  
structure TSr, in toluene

|   |          |           |           |
|---|----------|-----------|-----------|
| N | 3.706604 | -3.892185 | -2.838823 |
| C | 3.583587 | -2.559412 | -3.156897 |
| N | 4.458470 | -1.638782 | -2.868797 |
| C | 5.695709 | -2.049665 | -2.223470 |
| C | 5.466636 | -3.202696 | -1.247979 |
| C | 4.804381 | -4.358329 | -1.988932 |
| C | 1.748201 | -4.445962 | -4.264345 |
| C | 1.289962 | -3.022890 | -3.970000 |
| N | 2.468873 | -2.184764 | -3.864271 |
| C | 2.700036 | -4.903196 | -3.165343 |
| H | 6.113442 | -1.183501 | -1.702687 |
| H | 6.444278 | -2.347514 | -2.974439 |



|   |           |           |           |
|---|-----------|-----------|-----------|
| H | 4.815383  | -2.860497 | -0.436765 |
| H | 6.403987  | -3.542657 | -0.797909 |
| H | 5.540934  | -4.893086 | -2.604007 |
| H | 4.397915  | -5.086166 | -1.277432 |
| H | 3.221489  | -5.816563 | -3.472934 |
| H | 2.130987  | -5.155571 | -2.258149 |
| H | 2.254867  | -4.463012 | -5.233638 |
| H | 0.898172  | -5.131253 | -4.317025 |
| H | 0.680537  | -3.004591 | -3.052749 |
| H | 0.666899  | -2.637412 | -4.780073 |
| H | 4.206269  | 0.043684  | -2.964954 |
| O | 4.243981  | 1.046015  | -2.855780 |
| C | 3.326402  | 1.742661  | -3.600356 |
| O | 2.586239  | 0.768799  | -4.347345 |
| C | 1.752523  | 1.221939  | -5.423803 |
| H | 1.404714  | 2.239977  | -5.227624 |
| H | 0.871712  | 0.573629  | -5.411796 |
| C | 2.481533  | 1.097123  | -6.757932 |
| H | 2.854881  | 0.069216  | -6.831685 |
| H | 1.754111  | 1.223502  | -7.569434 |
| C | 3.637200  | 2.087383  | -6.947157 |
| H | 3.228688  | 3.089017  | -7.132952 |
| H | 4.185018  | 1.814242  | -7.855885 |
| C | 4.626211  | 2.181242  | -5.773644 |
| H | 5.045548  | 1.196663  | -5.539116 |
| H | 5.464962  | 2.805732  | -6.095164 |
| C | 4.021482  | 2.797293  | -4.499106 |
| H | 3.260596  | 3.530375  | -4.782485 |
| C | 5.076620  | 3.549690  | -3.651834 |
| H | 4.621781  | 3.843953  | -2.702038 |
| C | 5.607999  | 4.736943  | -4.316705 |
| H | 5.890784  | 2.863746  | -3.403296 |
| C | 6.036496  | 5.717395  | -4.867850 |
| H | 6.418539  | 6.587231  | -5.347623 |
| O | -0.123948 | 2.710651  | 3.926544  |
| C | -0.664250 | 1.937050  | 3.170406  |
| O | 2.440369  | 2.485182  | -2.782911 |
| C | 1.822396  | 1.762906  | -1.714755 |
| H | 2.592449  | 1.382083  | -1.037369 |
| H | 1.274149  | 0.902294  | -2.116747 |
| C | 0.876097  | 2.711088  | -0.994427 |
| H | 1.446408  | 3.577163  | -0.640383 |
| H | 0.142534  | 3.094813  | -1.712720 |
| C | 0.156224  | 2.041728  | 0.180856  |
| H | 0.899742  | 1.654622  | 0.887713  |
| H | -0.401719 | 1.167651  | -0.177857 |
| C | -0.805807 | 2.994742  | 0.898096  |

|   |           |           |           |
|---|-----------|-----------|-----------|
| H | -0.253166 | 3.853035  | 1.296682  |
| H | -1.524644 | 3.393991  | 0.175731  |
| C | -1.604833 | 2.347036  | 2.047901  |
| H | -2.105606 | 1.449431  | 1.677451  |
| C | -2.667351 | 3.314955  | 2.630347  |
| H | -3.134963 | 2.857089  | 3.509072  |
| C | -3.711629 | 3.669272  | 1.673692  |
| H | -2.165208 | 4.218054  | 2.990667  |
| C | -4.576518 | 3.947392  | 0.885670  |
| H | -5.343909 | 4.202470  | 0.193385  |
| O | -0.490809 | 0.602894  | 3.219551  |
| C | 0.416038  | 0.114720  | 4.253143  |
| C | 0.454938  | -1.383876 | 4.167995  |
| H | 0.045861  | 0.462013  | 5.219133  |
| H | 1.398089  | 0.560044  | 4.088309  |
| C | 1.495587  | -2.032786 | 3.498480  |
| C | -0.559940 | -2.152134 | 4.748109  |
| C | 1.525309  | -3.423490 | 3.411911  |
| H | 2.289101  | -1.446487 | 3.044686  |
| C | -0.535435 | -3.541187 | 4.660594  |
| H | -1.372739 | -1.657904 | 5.272170  |
| H | 2.342529  | -3.915159 | 2.894148  |
| C | 0.509244  | -4.179859 | 3.992443  |
| H | -1.327146 | -4.126031 | 5.117497  |
| H | 0.532259  | -5.262997 | 3.928753  |
| H | 2.390558  | -1.182805 | -3.997932 |

85 atoms

addition of another 3-isomer unit to the 3-isomer chain end,  
structure I3r, in toluene

|   |          |           |           |
|---|----------|-----------|-----------|
| N | 4.725764 | -3.899243 | -3.957607 |
| C | 4.265640 | -2.607555 | -3.860057 |
| N | 4.992156 | -1.579812 | -3.516233 |
| C | 6.411675 | -1.795300 | -3.280484 |
| C | 6.677648 | -3.155232 | -2.638024 |
| C | 6.079651 | -4.245823 | -3.518345 |
| C | 2.597586 | -4.612583 | -5.027154 |
| C | 1.975191 | -3.456658 | -4.254322 |
| N | 2.951106 | -2.385027 | -4.185917 |
| C | 3.887597 | -5.038518 | -4.336402 |
| H | 6.777949 | -0.990107 | -2.637213 |
| H | 6.977075 | -1.718189 | -4.222304 |
| H | 6.212261 | -3.181092 | -1.647226 |
| H | 7.748343 | -3.335528 | -2.504743 |
| H | 6.714432 | -4.422425 | -4.397271 |
| H | 6.026109 | -5.193310 | -2.970446 |

|   |           |           |           |
|---|-----------|-----------|-----------|
| H | 4.473715  | -5.688586 | -4.995641 |
| H | 3.654218  | -5.628989 | -3.438131 |
| H | 2.806318  | -4.285617 | -6.049903 |
| H | 1.915683  | -5.465311 | -5.079742 |
| H | 1.658892  | -3.795703 | -3.255564 |
| H | 1.086736  | -3.077422 | -4.763447 |
| H | 4.254050  | -0.171010 | -2.888494 |
| O | 3.850042  | 0.605809  | -2.388644 |
| C | 3.093182  | 1.419148  | -3.197678 |
| O | 2.251780  | 0.531457  | -3.957651 |
| C | 1.494501  | 1.070955  | -5.050594 |
| H | 1.261288  | 2.123160  | -4.862550 |
| H | 0.546295  | 0.526344  | -5.050427 |
| C | 2.221627  | 0.863532  | -6.376390 |
| H | 2.480409  | -0.199043 | -6.447405 |
| H | 1.521904  | 1.069537  | -7.195977 |
| C | 3.482157  | 1.718478  | -6.553053 |
| H | 3.190145  | 2.761195  | -6.733068 |
| H | 4.000931  | 1.391493  | -7.461192 |
| C | 4.469145  | 1.690161  | -5.374610 |
| H | 4.774589  | 0.662308  | -5.151428 |
| H | 5.373670  | 2.220744  | -5.687328 |
| C | 3.930949  | 2.367281  | -4.100257 |
| H | 3.267044  | 3.186496  | -4.392033 |
| C | 5.059538  | 2.993297  | -3.244124 |
| H | 4.637780  | 3.324076  | -2.291284 |
| C | 5.715423  | 4.124101  | -3.896689 |
| H | 5.800673  | 2.226435  | -3.000902 |
| C | 6.248689  | 5.058058  | -4.436989 |
| H | 6.721341  | 5.887488  | -4.907544 |
| O | -0.512915 | 3.119800  | 4.075484  |
| C | -1.096763 | 2.321847  | 3.379226  |
| O | 2.305728  | 2.270141  | -2.405672 |
| C | 1.572415  | 1.649566  | -1.341704 |
| H | 2.269850  | 1.275673  | -0.587342 |
| H | 1.009054  | 0.795634  | -1.732446 |
| C | 0.637788  | 2.694846  | -0.752742 |
| H | 1.231662  | 3.560305  | -0.437725 |
| H | -0.039972 | 3.051703  | -1.536663 |
| C | -0.168792 | 2.156018  | 0.433206  |
| H | 0.522199  | 1.788907  | 1.201562  |
| H | -0.756329 | 1.285463  | 0.115763  |
| C | -1.107307 | 3.209224  | 1.031799  |
| H | -0.526068 | 4.069379  | 1.382824  |
| H | -1.778344 | 3.582286  | 0.251793  |
| C | -1.977571 | 2.695900  | 2.196946  |
| H | -2.518251 | 1.801828  | 1.877792  |

|   |           |           |           |
|---|-----------|-----------|-----------|
| C | -2.999450 | 3.762596  | 2.669700  |
| H | -3.523069 | 3.396126  | 3.559664  |
| C | -3.987642 | 4.107558  | 1.652027  |
| H | -2.455983 | 4.658657  | 2.984939  |
| C | -4.806578 | 4.379232  | 0.814242  |
| H | -5.533304 | 4.628223  | 0.077311  |
| O | -1.032851 | 0.989357  | 3.557205  |
| C | -0.185454 | 0.530056  | 4.653356  |
| C | -0.261827 | -0.968538 | 4.701289  |
| H | -0.543243 | 0.989422  | 5.575927  |
| H | 0.830286  | 0.884204  | 4.471348  |
| C | 0.648088  | -1.750050 | 3.983359  |
| C | -1.257498 | -1.604143 | 5.449309  |
| C | 0.566317  | -3.140329 | 4.012688  |
| H | 1.426111  | -1.266919 | 3.399683  |
| C | -1.342762 | -2.993866 | 5.480585  |
| H | -1.968957 | -1.006391 | 6.011600  |
| H | 1.281265  | -3.735615 | 3.454060  |
| C | -0.429940 | -3.764566 | 4.761758  |
| H | -2.118009 | -3.475141 | 6.067928  |
| H | -0.492761 | -4.847659 | 4.788307  |
| H | 2.633877  | -1.436799 | -4.012095 |

85 atoms

addition of another 3-isomer unit to the 3-isomer chain end,  
structure TS34, in toluene

|   |          |          |           |
|---|----------|----------|-----------|
| N | 3.713404 | 3.574203 | 0.883876  |
| C | 3.413255 | 2.282384 | 0.594936  |
| N | 3.545848 | 1.828302 | -0.661825 |
| C | 4.036175 | 2.655073 | -1.754551 |
| C | 3.594789 | 4.097037 | -1.535420 |
| C | 4.048298 | 4.555104 | -0.155020 |
| C | 3.776894 | 2.944874 | 3.281045  |
| C | 2.749444 | 1.885197 | 2.898151  |
| N | 2.987750 | 1.442257 | 1.533155  |
| C | 3.732488 | 4.077622 | 2.262816  |
| H | 3.629934 | 2.249152 | -2.681607 |
| H | 5.130019 | 2.597741 | -1.824341 |
| H | 2.505319 | 4.159283 | -1.612308 |
| H | 4.021259 | 4.755869 | -2.295438 |
| H | 5.131333 | 4.732850 | -0.145742 |
| H | 3.565350 | 5.500097 | 0.111993  |
| H | 4.609260 | 4.723840 | 2.370390  |
| H | 2.847318 | 4.705690 | 2.424281  |
| H | 4.773189 | 2.493261 | 3.297236  |
| H | 3.577422 | 3.345232 | 4.277948  |

|   |           |           |           |
|---|-----------|-----------|-----------|
| H | 1.732426  | 2.285354  | 3.004907  |
| H | 2.820132  | 1.011118  | 3.546893  |
| H | 3.148112  | 0.906298  | -0.888745 |
| O | 2.327695  | -0.516693 | -1.476847 |
| C | 2.364127  | -1.633749 | -0.944569 |
| O | 2.793764  | -1.094585 | 0.978262  |
| C | 3.394184  | -1.974168 | 1.870993  |
| H | 3.012082  | -3.003182 | 1.729989  |
| H | 3.131395  | -1.713283 | 2.915809  |
| C | 4.927719  | -1.984075 | 1.758674  |
| H | 5.269952  | -0.943764 | 1.841196  |
| H | 5.358415  | -2.520793 | 2.616415  |
| C | 5.486051  | -2.602078 | 0.469385  |
| H | 5.354268  | -3.691652 | 0.504886  |
| H | 6.571207  | -2.439781 | 0.452160  |
| C | 4.902371  | -2.091072 | -0.860760 |
| H | 4.883764  | -0.998138 | -0.879056 |
| H | 5.589300  | -2.402032 | -1.654958 |
| C | 3.497291  | -2.628453 | -1.198047 |
| H | 3.291138  | -3.523087 | -0.607138 |
| C | 3.375973  | -3.029528 | -2.698683 |
| H | 2.336026  | -3.294400 | -2.915276 |
| C | 4.236528  | -4.146168 | -3.078283 |
| H | 3.607510  | -2.154997 | -3.316135 |
| C | 4.944273  | -5.071118 | -3.381699 |
| H | 5.564825  | -5.892242 | -3.652604 |
| O | -5.905708 | -1.830793 | -1.218381 |
| C | -5.420280 | -1.228535 | -0.288852 |
| O | 1.215240  | -2.321572 | -0.672144 |
| C | 0.045543  | -1.520423 | -0.462649 |
| H | -0.192872 | -0.972177 | -1.379360 |
| H | 0.270620  | -0.794459 | 0.322606  |
| C | -1.088993 | -2.446756 | -0.057267 |
| H | -1.237273 | -3.197404 | -0.842278 |
| H | -0.792644 | -2.993073 | 0.844809  |
| C | -2.396442 | -1.688918 | 0.195589  |
| H | -2.679121 | -1.140972 | -0.711648 |
| H | -2.235563 | -0.928101 | 0.969514  |
| C | -3.538490 | -2.615207 | 0.626871  |
| H | -3.736960 | -3.353725 | -0.158090 |
| H | -3.232520 | -3.176796 | 1.514987  |
| C | -4.855641 | -1.885807 | 0.960821  |
| H | -4.658374 | -1.103987 | 1.697961  |
| C | -5.927463 | -2.853972 | 1.526559  |
| H | -6.874669 | -2.317056 | 1.649757  |
| C | -5.553225 | -3.445890 | 2.807427  |
| H | -6.118186 | -3.640707 | 0.790214  |

|   |           |           |           |
|---|-----------|-----------|-----------|
| C | -5.245709 | -3.920854 | 3.868628  |
| H | -4.977473 | -4.348977 | 4.805630  |
| O | -5.310218 | 0.112617  | -0.245735 |
| C | -5.806846 | 0.832655  | -1.413471 |
| C | -5.627253 | 2.302127  | -1.162930 |
| H | -6.855033 | 0.565700  | -1.556780 |
| H | -5.249677 | 0.494293  | -2.288254 |
| C | -4.491635 | 2.970505  | -1.628442 |
| C | -6.587578 | 3.019836  | -0.442827 |
| C | -4.318601 | 4.330987  | -1.382140 |
| H | -3.739331 | 2.423057  | -2.188574 |
| C | -6.417030 | 4.378865  | -0.192790 |
| H | -7.474255 | 2.510103  | -0.077282 |
| H | -3.434486 | 4.839167  | -1.753343 |
| C | -5.281279 | 5.037314  | -0.663345 |
| H | -7.171098 | 4.925157  | 0.364496  |
| H | -5.149562 | 6.097657  | -0.473295 |
| H | 2.903186  | 0.381830  | 1.294320  |

85 atoms

addition of another 3-isomer unit to the 3-isomer chain end,  
structure I4, in toluene

|   |           |          |           |
|---|-----------|----------|-----------|
| N | 0.524053  | 3.667490 | 1.361100  |
| C | 1.219361  | 2.564246 | 0.920711  |
| N | 1.498015  | 2.500301 | -0.418094 |
| C | 1.327892  | 3.614156 | -1.329994 |
| C | 0.028947  | 4.329499 | -0.979471 |
| C | 0.072081  | 4.748545 | 0.484681  |
| C | 1.212036  | 3.015127 | 3.644111  |
| C | 1.188155  | 1.597699 | 3.074944  |
| N | 1.598784  | 1.571013 | 1.678715  |
| C | 0.316242  | 3.905237 | 2.791411  |
| H | 1.299319  | 3.218105 | -2.347068 |
| H | 2.171450  | 4.319779 | -1.280457 |
| H | -0.812831 | 3.652436 | -1.152590 |
| H | -0.115330 | 5.213445 | -1.606493 |
| H | 0.734245  | 5.618731 | 0.606745  |
| H | -0.923425 | 5.062048 | 0.818639  |
| H | 0.521419  | 4.962890 | 2.994632  |
| H | -0.740799 | 3.734518 | 3.037103  |
| H | 2.239776  | 3.392611 | 3.624142  |
| H | 0.872240  | 3.040292 | 4.683759  |
| H | 0.177299  | 1.175716 | 3.193226  |
| H | 1.860206  | 0.943929 | 3.637693  |
| H | 2.005633  | 1.680390 | -0.726877 |
| O | 2.943079  | 0.118325 | -1.562472 |

|   |           |           |           |
|---|-----------|-----------|-----------|
| C | 3.223383  | -0.968127 | -1.096442 |
| O | 3.859288  | -0.036565 | 1.492955  |
| C | 4.953087  | 0.849864  | 1.655426  |
| H | 5.686052  | 0.356499  | 2.307167  |
| H | 4.624202  | 1.760536  | 2.175374  |
| C | 5.643730  | 1.254105  | 0.349009  |
| H | 4.908780  | 1.709857  | -0.322811 |
| H | 6.355617  | 2.049241  | 0.607708  |
| C | 6.418667  | 0.135601  | -0.381077 |
| H | 6.792940  | -0.587421 | 0.355524  |
| H | 7.314168  | 0.582847  | -0.827456 |
| C | 5.715736  | -0.626522 | -1.518786 |
| H | 5.315507  | 0.085591  | -2.246949 |
| H | 6.491570  | -1.195593 | -2.040134 |
| C | 4.603128  | -1.613123 | -1.127999 |
| H | 4.774708  | -2.005872 | -0.123532 |
| C | 4.538928  | -2.827549 | -2.104819 |
| H | 3.663554  | -3.436161 | -1.864308 |
| C | 5.729760  | -3.670762 | -2.056089 |
| H | 4.395393  | -2.462012 | -3.128881 |
| C | 6.708491  | -4.368065 | -2.005155 |
| H | 7.571745  | -4.989212 | -1.960419 |
| O | -4.702596 | -3.378711 | -1.030242 |
| C | -4.379145 | -2.517500 | -0.245423 |
| O | 2.318593  | -1.794413 | -0.558432 |
| C | 0.950124  | -1.321828 | -0.470968 |
| H | 0.615372  | -1.032704 | -1.470711 |
| H | 0.934167  | -0.438741 | 0.170711  |
| C | 0.111760  | -2.449085 | 0.103841  |
| H | 0.193518  | -3.329085 | -0.544095 |
| H | 0.524329  | -2.734884 | 1.077140  |
| C | -1.358576 | -2.043437 | 0.255787  |
| H | -1.755903 | -1.744436 | -0.721506 |
| H | -1.429354 | -1.155085 | 0.894690  |
| C | -2.215804 | -3.165197 | 0.851404  |
| H | -2.183117 | -4.047187 | 0.201653  |
| H | -1.794038 | -3.469798 | 1.814135  |
| C | -3.691460 | -2.779828 | 1.085433  |
| H | -3.733114 | -1.862665 | 1.677638  |
| C | -4.469440 | -3.897240 | 1.827200  |
| H | -5.530210 | -3.628555 | 1.880557  |
| C | -3.977206 | -4.142484 | 3.179490  |
| H | -4.419750 | -4.816759 | 1.236095  |
| C | -3.574491 | -4.330504 | 4.296951  |
| H | -3.220740 | -4.506178 | 5.285525  |
| O | -4.574492 | -1.202721 | -0.459417 |
| C | -5.206657 | -0.847942 | -1.725371 |

|   |           |           |           |
|---|-----------|-----------|-----------|
| C | -5.316601 | 0.648334  | -1.787699 |
| H | -6.183304 | -1.333947 | -1.762374 |
| H | -4.600461 | -1.247746 | -2.539095 |
| C | -4.411946 | 1.398356  | -2.543233 |
| C | -6.322667 | 1.314057  | -1.079393 |
| C | -4.510560 | 2.788012  | -2.594416 |
| H | -3.627540 | 0.892324  | -3.098285 |
| C | -6.421498 | 2.701690  | -1.124451 |
| H | -7.032045 | 0.740502  | -0.490125 |
| H | -3.805948 | 3.357981  | -3.191286 |
| C | -5.515199 | 3.441794  | -1.884007 |
| H | -7.208062 | 3.206031  | -0.572604 |
| H | -5.595577 | 4.523270  | -1.924882 |
| H | 3.029861  | 0.502741  | 1.458261  |

85 atoms

addition of another 3-isomer unit to the 3-isomer chain end,  
structure I5, in toluene

|   |           |           |           |
|---|-----------|-----------|-----------|
| N | -6.029017 | -3.964079 | -4.371826 |
| C | -5.477716 | -2.898538 | -3.697232 |
| N | -5.979186 | -2.627738 | -2.445094 |
| C | -6.766604 | -3.583486 | -1.689997 |
| C | -7.787646 | -4.205068 | -2.634210 |
| C | -7.058502 | -4.840555 | -3.811781 |
| C | -4.102668 | -3.803601 | -5.909281 |
| C | -4.110019 | -2.322013 | -5.535657 |
| N | -4.551088 | -2.111133 | -4.166803 |
| C | -5.489764 | -4.385983 | -5.666148 |
| H | -7.260492 | -3.049924 | -0.875170 |
| H | -6.144749 | -4.370811 | -1.235225 |
| H | -8.466943 | -3.424068 | -2.987928 |
| H | -8.385204 | -4.964799 | -2.123559 |
| H | -6.598491 | -5.790270 | -3.499886 |
| H | -7.769125 | -5.083391 | -4.609754 |
| H | -5.451553 | -5.481204 | -5.677783 |
| H | -6.179539 | -4.083911 | -6.466197 |
| H | -3.367889 | -4.326476 | -5.287941 |
| H | -3.817710 | -3.954741 | -6.954747 |
| H | -4.754431 | -1.771410 | -6.239434 |
| H | -3.108039 | -1.896827 | -5.645387 |
| H | -5.471564 | -1.903974 | -1.949390 |
| O | 0.785725  | -2.795254 | 2.692877  |
| C | 1.232020  | -2.467667 | 1.617576  |
| O | -4.036772 | -0.365465 | -2.090880 |
| C | -2.706621 | -0.396847 | -1.597112 |
| H | -2.674948 | 0.289904  | -0.744546 |



|   |           |           |           |
|---|-----------|-----------|-----------|
| H | -2.007793 | -0.002999 | -2.350718 |
| C | -2.252324 | -1.790685 | -1.157495 |
| H | -2.952304 | -2.162694 | -0.399276 |
| H | -2.328822 | -2.471926 | -2.012871 |
| C | -0.824556 | -1.807411 | -0.602337 |
| H | -0.757374 | -1.109016 | 0.241042  |
| H | -0.130139 | -1.428238 | -1.362813 |
| C | -0.376419 | -3.205419 | -0.162577 |
| H | -1.038131 | -3.577472 | 0.627971  |
| H | -0.474676 | -3.897812 | -1.004549 |
| C | 1.079738  | -3.280030 | 0.341142  |
| H | 1.744560  | -2.855832 | -0.415027 |
| C | 1.516092  | -4.738698 | 0.635759  |
| H | 2.514957  | -4.736325 | 1.085987  |
| C | 1.538923  | -5.587049 | -0.552178 |
| H | 0.845447  | -5.163930 | 1.388726  |
| C | 1.569564  | -6.277950 | -1.536144 |
| H | 1.597918  | -6.896810 | -2.401806 |
| O | 6.177370  | 3.216519  | 4.880530  |
| C | 5.000057  | 3.470272  | 4.990879  |
| O | 1.915687  | -1.328042 | 1.410214  |
| C | 2.091364  | -0.457961 | 2.557527  |
| H | 2.611674  | -1.015160 | 3.340304  |
| H | 1.105940  | -0.184146 | 2.941984  |
| C | 2.881201  | 0.753821  | 2.098524  |
| H | 3.837511  | 0.418882  | 1.682334  |
| H | 2.338584  | 1.244192  | 1.283182  |
| C | 3.124602  | 1.749117  | 3.238521  |
| H | 3.651667  | 1.242522  | 4.055889  |
| H | 2.163933  | 2.076338  | 3.654254  |
| C | 3.922415  | 2.974132  | 2.778642  |
| H | 4.901679  | 2.660443  | 2.400060  |
| H | 3.401591  | 3.453123  | 1.943879  |
| C | 4.135647  | 4.037076  | 3.874456  |
| H | 3.169316  | 4.317305  | 4.299832  |
| C | 4.829451  | 5.308345  | 3.318739  |
| H | 5.048184  | 5.993547  | 4.145141  |
| C | 4.029155  | 6.013823  | 2.322281  |
| H | 5.797589  | 5.026809  | 2.893174  |
| C | 3.359220  | 6.596417  | 1.511089  |
| H | 2.773640  | 7.117287  | 0.790577  |
| O | 4.296095  | 3.273448  | 6.120041  |
| C | 5.035277  | 2.714039  | 7.248419  |
| C | 4.085362  | 2.578726  | 8.402838  |
| H | 5.866170  | 3.383913  | 7.474891  |
| H | 5.450008  | 1.752457  | 6.942976  |
| C | 3.398710  | 1.381186  | 8.621947  |

|   |           |           |           |
|---|-----------|-----------|-----------|
| C | 3.858331  | 3.656813  | 9.263989  |
| C | 2.502441  | 1.261132  | 9.681736  |
| H | 3.568183  | 0.536912  | 7.960070  |
| C | 2.962497  | 3.540932  | 10.323710 |
| H | 4.387430  | 4.591642  | 9.103386  |
| H | 1.977968  | 0.324952  | 9.842837  |
| C | 2.282810  | 2.341684  | 10.534290 |
| H | 2.797149  | 4.383835  | 10.986821 |
| H | 1.586947  | 2.249039  | 11.361824 |
| H | -4.083177 | -0.859147 | -2.950210 |

85 atoms

addition of another 3-isomer unit to the 7-isomer chain end,  
structure 11, in toluene

|   |           |           |          |
|---|-----------|-----------|----------|
| N | 4.928319  | -3.712914 | 3.963660 |
| C | 3.579344  | -3.862412 | 4.201004 |
| N | 2.735116  | -3.631335 | 3.141031 |
| C | 3.206790  | -3.625626 | 1.766967 |
| C | 4.471006  | -2.781378 | 1.705830 |
| C | 5.502534  | -3.366027 | 2.661913 |
| C | 5.300159  | -4.900368 | 6.092290 |
| C | 3.951344  | -4.309493 | 6.494336 |
| N | 3.055508  | -4.163287 | 5.357048 |
| C | 5.910350  | -4.031655 | 5.000802 |
| H | 2.416361  | -3.205072 | 1.143125 |
| H | 3.409190  | -4.642302 | 1.395210 |
| H | 4.227966  | -1.753833 | 1.991585 |
| H | 4.883675  | -2.759625 | 0.693794 |
| H | 5.959460  | -4.263061 | 2.218043 |
| H | 6.315307  | -2.649981 | 2.829146 |
| H | 6.750161  | -4.549515 | 4.523912 |
| H | 6.312029  | -3.102156 | 5.427768 |
| H | 5.150779  | -5.917803 | 5.715510 |
| H | 5.983676  | -4.960169 | 6.944466 |
| H | 4.116444  | -3.338026 | 6.988112 |
| H | 3.462063  | -4.948128 | 7.236218 |
| H | 1.785441  | -3.953305 | 3.275314 |
| O | -0.161695 | -4.582978 | 2.616197 |
| C | -0.386159 | -5.532447 | 3.336611 |
| O | 0.626463  | -6.381449 | 3.582943 |
| C | 0.558680  | -7.421804 | 4.591400 |
| H | 0.219063  | -6.978362 | 5.529132 |
| H | 1.602288  | -7.708170 | 4.715840 |
| C | -0.276235 | -8.617946 | 4.155482 |
| H | 0.022310  | -8.892342 | 3.136983 |
| H | -0.002184 | -9.464911 | 4.795004 |

|   |           |           |           |
|---|-----------|-----------|-----------|
| C | -1.790083 | -8.400227 | 4.232134  |
| H | -2.081633 | -8.281181 | 5.283137  |
| H | -2.298551 | -9.302701 | 3.876792  |
| C | -2.311993 | -7.194869 | 3.442419  |
| H | -2.108826 | -7.320798 | 2.372016  |
| H | -3.400097 | -7.166674 | 3.544746  |
| C | -1.761348 | -5.828643 | 3.919887  |
| H | -1.644235 | -5.851977 | 5.007643  |
| C | -2.715228 | -4.662820 | 3.574264  |
| H | -2.226489 | -3.716270 | 3.816378  |
| C | -3.991574 | -4.744229 | 4.280033  |
| H | -2.889099 | -4.639569 | 2.493548  |
| C | -5.037423 | -4.812357 | 4.870632  |
| H | -5.964012 | -4.862506 | 5.392212  |
| O | -0.190449 | 2.986615  | 4.346633  |
| O | 0.367001  | -4.449635 | 6.029155  |
| C | -0.846286 | 2.926117  | 5.359367  |
| C | -1.037744 | 1.696727  | 6.221555  |
| H | -2.114874 | 1.543640  | 6.351119  |
| H | -0.660144 | 1.934670  | 7.222906  |
| C | -0.363715 | 0.444340  | 5.663804  |
| H | -0.759063 | 0.234090  | 4.664413  |
| H | 0.704796  | 0.639463  | 5.525395  |
| C | -0.557765 | -0.777027 | 6.569079  |
| H | -1.630628 | -0.966926 | 6.701914  |
| H | -0.169384 | -0.553998 | 7.567715  |
| C | 0.116997  | -2.031442 | 6.003695  |
| H | -0.234370 | -2.198534 | 4.979321  |
| H | 1.199003  | -1.869839 | 5.925141  |
| C | -0.124979 | -3.341239 | 6.769338  |
| H | -1.203301 | -3.507440 | 6.867810  |
| C | 0.488645  | -3.373005 | 8.199226  |
| H | 0.567011  | -4.429234 | 8.475845  |
| C | -0.270238 | -2.678446 | 9.235571  |
| H | 1.513951  | -2.985820 | 8.163851  |
| C | -0.910901 | -2.142722 | 10.102074 |
| H | -1.477053 | -1.657973 | 10.861926 |
| O | -1.512959 | 3.981695  | 5.875156  |
| C | -1.400302 | 5.230688  | 5.136910  |
| C | -2.199622 | 6.272941  | 5.865644  |
| H | -1.770397 | 5.067127  | 4.123291  |
| H | -0.344502 | 5.498872  | 5.069981  |
| C | -3.555668 | 6.456630  | 5.579496  |
| C | -1.605302 | 7.059982  | 6.856388  |
| C | -4.303577 | 7.408992  | 6.267733  |
| H | -4.027567 | 5.850069  | 4.812009  |
| C | -2.349636 | 8.013608  | 7.546931  |

|   |           |           |          |
|---|-----------|-----------|----------|
| H | -0.552533 | 6.925189  | 7.087067 |
| H | -5.354615 | 7.543888  | 6.033577 |
| C | -3.701026 | 8.189731  | 7.253208 |
| H | -1.875279 | 8.620501  | 8.311377 |
| H | -4.281644 | 8.934464  | 7.788018 |
| H | 1.317559  | -4.302952 | 5.766746 |

85 atoms

addition of another 3-isomer unit to the 7-isomer chain end,  
structure TS12, in toluene

|   |          |           |           |
|---|----------|-----------|-----------|
| N | 3.820732 | 3.873844  | -0.145371 |
| C | 3.458680 | 2.568421  | -0.224973 |
| N | 3.145977 | 2.020533  | -1.400102 |
| C | 3.268325 | 2.739704  | -2.658999 |
| C | 2.935481 | 4.208379  | -2.435155 |
| C | 3.813457 | 4.757772  | -1.318128 |
| C | 4.708346 | 3.445412  | 2.123711  |
| C | 3.665114 | 2.339859  | 2.210081  |
| N | 3.403503 | 1.812645  | 0.879002  |
| C | 4.248714 | 4.490268  | 1.115727  |
| H | 2.580244 | 2.279449  | -3.369401 |
| H | 4.280946 | 2.632984  | -3.069593 |
| H | 1.880178 | 4.305253  | -2.163968 |
| H | 3.099391 | 4.788199  | -3.346319 |
| H | 4.843672 | 4.897765  | -1.669298 |
| H | 3.447728 | 5.735707  | -0.991999 |
| H | 5.064274 | 5.181432  | 0.884593  |
| H | 3.424598 | 5.087897  | 1.525739  |
| H | 5.666179 | 3.020094  | 1.810130  |
| H | 4.855378 | 3.916677  | 3.098141  |
| H | 2.742831 | 2.723262  | 2.666503  |
| H | 4.014603 | 1.512571  | 2.829566  |
| H | 2.934310 | 0.994082  | -1.444064 |
| O | 2.515367 | -0.604087 | -1.597071 |
| C | 3.117445 | -1.327958 | -0.761391 |
| O | 4.465894 | -0.958869 | -0.606319 |
| C | 5.306288 | -1.661159 | 0.315805  |
| H | 4.710197 | -2.037728 | 1.149476  |
| H | 5.994160 | -0.909814 | 0.715147  |
| C | 6.088634 | -2.768410 | -0.380615 |
| H | 6.583285 | -2.332047 | -1.256574 |
| H | 6.886604 | -3.114264 | 0.288871  |
| C | 5.224665 | -3.958865 | -0.806460 |
| H | 4.913187 | -4.518263 | 0.085551  |
| H | 5.838781 | -4.650477 | -1.394794 |
| C | 3.970892 | -3.598871 | -1.616342 |

|   |            |           |           |
|---|------------|-----------|-----------|
| H | 4.241910   | -3.006165 | -2.497690 |
| H | 3.542519   | -4.533037 | -1.993455 |
| C | 2.864355   | -2.861098 | -0.826321 |
| H | 2.835393   | -3.269858 | 0.186743  |
| C | 1.488875   | -3.115985 | -1.493852 |
| H | 0.739680   | -2.433298 | -1.090149 |
| C | 1.018959   | -4.491352 | -1.339013 |
| H | 1.561785   | -2.864018 | -2.556032 |
| C | 0.632437   | -5.622941 | -1.199700 |
| H | 0.284181   | -6.621056 | -1.076603 |
| O | -4.306471  | 2.090262  | -0.499519 |
| O | 2.624741   | -0.862439 | 0.886212  |
| C | -4.584960  | 0.997356  | -0.065242 |
| C | -3.613005  | 0.010119  | 0.544233  |
| H | -3.815712  | -0.976044 | 0.114247  |
| H | -3.868358  | -0.081802 | 1.607241  |
| C | -2.146978  | 0.404153  | 0.370220  |
| H | -1.915820  | 0.475741  | -0.698298 |
| H | -1.994116  | 1.409619  | 0.776071  |
| C | -1.186765  | -0.581866 | 1.044698  |
| H | -1.358439  | -1.589469 | 0.643556  |
| H | -1.420305  | -0.643575 | 2.111829  |
| C | 0.282117   | -0.195629 | 0.835885  |
| H | 0.480497   | -0.093544 | -0.234494 |
| H | 0.469159   | 0.794393  | 1.274108  |
| C | 1.343792   | -1.175823 | 1.377640  |
| H | 1.061461   | -2.199086 | 1.087412  |
| C | 1.463485   | -1.177589 | 2.931009  |
| H | 2.411390   | -1.672110 | 3.164915  |
| C | 0.396964   | -1.847111 | 3.670994  |
| H | 1.562950   | -0.142320 | 3.279821  |
| C | -0.453165  | -2.427909 | 4.294844  |
| H | -1.214758  | -2.939449 | 4.834342  |
| O | -5.842106  | 0.503259  | -0.055061 |
| C | -6.875952  | 1.375449  | -0.591031 |
| C | -8.191341  | 0.659084  | -0.477519 |
| H | -6.627858  | 1.610083  | -1.627535 |
| H | -6.868461  | 2.308182  | -0.024053 |
| C | -8.673375  | -0.115034 | -1.536730 |
| C | -8.943671  | 0.738968  | 0.698355  |
| C | -9.884321  | -0.794936 | -1.425683 |
| H | -8.096497  | -0.185331 | -2.454278 |
| C | -10.154109 | 0.060103  | 0.813841  |
| H | -8.578176  | 1.337284  | 1.527896  |
| H | -10.248519 | -1.390108 | -2.256831 |
| C | -10.627011 | -0.708214 | -0.249366 |
| H | -10.729702 | 0.132659  | 1.731001  |

|   |            |           |           |
|---|------------|-----------|-----------|
| H | -11.571693 | -1.235208 | -0.162051 |
| H | 3.108569   | 0.816308  | 0.805588  |

85 atoms

addition of another 3-isomer unit to the 7-isomer chain end,  
structure I2, in toluene

|   |           |           |           |
|---|-----------|-----------|-----------|
| N | -2.176464 | -0.903848 | -4.831223 |
| C | -1.724476 | -0.405857 | -3.629909 |
| N | -1.471746 | 0.850217  | -3.394556 |
| C | -1.745119 | 1.813545  | -4.449791 |
| C | -1.451898 | 1.234868  | -5.831985 |
| C | -2.258169 | -0.044835 | -6.014668 |
| C | -2.655391 | -3.101581 | -3.781093 |
| C | -1.539713 | -2.739684 | -2.809521 |
| N | -1.564558 | -1.304312 | -2.603947 |
| C | -2.462047 | -2.318210 | -5.073232 |
| H | -1.132902 | 2.701900  | -4.269680 |
| H | -2.793430 | 2.148551  | -4.406236 |
| H | -0.382180 | 1.014556  | -5.909244 |
| H | -1.700979 | 1.944008  | -6.626866 |
| H | -3.310931 | 0.189856  | -6.223756 |
| H | -1.883491 | -0.613538 | -6.873378 |
| H | -3.363813 | -2.381659 | -5.692606 |
| H | -1.644209 | -2.760666 | -5.661502 |
| H | -3.618919 | -2.851002 | -3.327899 |
| H | -2.654698 | -4.172490 | -4.000635 |
| H | -0.572043 | -3.088811 | -3.204065 |
| H | -1.688880 | -3.224909 | -1.842453 |
| H | -0.956596 | 1.495493  | -1.913605 |
| O | -0.564408 | 1.952888  | -1.097393 |
| C | -0.705233 | 1.166531  | 0.005410  |
| O | -2.058091 | 0.784532  | 0.070723  |
| C | -2.502414 | -0.017733 | 1.173231  |
| H | -1.667585 | -0.589830 | 1.587365  |
| H | -3.213941 | -0.732371 | 0.751467  |
| C | -3.175618 | 0.849150  | 2.228031  |
| H | -3.974697 | 1.417054  | 1.737941  |
| H | -3.660682 | 0.198613  | 2.966467  |
| C | -2.213579 | 1.808305  | 2.934396  |
| H | -1.545715 | 1.238161  | 3.593705  |
| H | -2.793119 | 2.464908  | 3.592768  |
| C | -1.357554 | 2.681524  | 2.003390  |
| H | -1.989952 | 3.194903  | 1.271580  |
| H | -0.897406 | 3.462392  | 2.616605  |
| C | -0.214601 | 1.950711  | 1.264536  |
| H | 0.223454  | 1.225198  | 1.957128  |

|   |           |           |           |
|---|-----------|-----------|-----------|
| C | 0.886826  | 2.980691  | 0.885943  |
| H | 1.579026  | 2.566453  | 0.151156  |
| C | 1.645884  | 3.449379  | 2.043693  |
| H | 0.413817  | 3.828529  | 0.382848  |
| C | 2.274443  | 3.820250  | 3.000536  |
| H | 2.834103  | 4.153201  | 3.842484  |
| O | 5.304511  | 1.007498  | -5.512781 |
| O | -0.027922 | -0.120840 | -0.146113 |
| C | 5.983563  | 0.977861  | -4.513851 |
| C | 5.495306  | 0.646243  | -3.119496 |
| H | 5.875080  | 1.413340  | -2.436573 |
| H | 5.990791  | -0.282942 | -2.812810 |
| C | 3.976607  | 0.513538  | -3.019752 |
| H | 3.509364  | 1.455257  | -3.326827 |
| H | 3.632029  | -0.237443 | -3.737940 |
| C | 3.510643  | 0.137650  | -1.608914 |
| H | 3.866308  | 0.891156  | -0.894182 |
| H | 3.981024  | -0.803227 | -1.308732 |
| C | 1.983622  | 0.029268  | -1.521796 |
| H | 1.534514  | 0.955854  | -1.885468 |
| H | 1.626306  | -0.761150 | -2.193206 |
| C | 1.406393  | -0.232554 | -0.123439 |
| H | 1.823236  | 0.477407  | 0.596012  |
| C | 1.663975  | -1.657897 | 0.423100  |
| H | 0.948788  | -1.824432 | 1.234438  |
| C | 3.009268  | -1.903041 | 0.935103  |
| H | 1.420547  | -2.390230 | -0.355377 |
| C | 4.098084  | -2.117526 | 1.398857  |
| H | 5.067774  | -2.298112 | 1.799169  |
| O | 7.308917  | 1.234631  | -4.509875 |
| C | 7.902634  | 1.551374  | -5.800779 |
| C | 9.365681  | 1.813909  | -5.584982 |
| H | 7.387678  | 2.421000  | -6.212553 |
| H | 7.733319  | 0.709989  | -6.474986 |
| C | 9.817065  | 3.099327  | -5.270900 |
| C | 10.295376 | 0.773652  | -5.672323 |
| C | 11.170594 | 3.341796  | -5.049583 |
| H | 9.103269  | 3.914857  | -5.200039 |
| C | 11.650071 | 1.012037  | -5.452131 |
| H | 9.955794  | -0.229038 | -5.915240 |
| H | 11.508260 | 4.344841  | -4.809672 |
| C | 12.089950 | 2.297545  | -5.140173 |
| H | 12.361900 | 0.196260  | -5.526442 |
| H | 13.145345 | 2.485575  | -4.971254 |
| H | -1.136264 | -0.924987 | -1.767842 |

85 atoms

addition of another 3-isomer unit to the 7-isomer chain end,  
structure TS23, in toluene

|   |           |           |           |
|---|-----------|-----------|-----------|
| N | -2.018469 | -0.841772 | -4.870048 |
| C | -1.775237 | -0.335435 | -3.613787 |
| N | -1.429041 | 0.894086  | -3.360260 |
| C | -1.360559 | 1.829600  | -4.472284 |
| C | -0.858079 | 1.155768  | -5.747207 |
| C | -1.752275 | -0.036541 | -6.064518 |
| C | -2.915273 | -2.942570 | -3.890733 |
| C | -2.000091 | -2.631838 | -2.713323 |
| N | -1.950793 | -1.190987 | -2.553225 |
| C | -2.389117 | -2.233093 | -5.132444 |
| H | -0.698024 | 2.651955  | -4.187479 |
| H | -2.347707 | 2.280793  | -4.658940 |
| H | 0.171644  | 0.817525  | -5.592897 |
| H | -0.853755 | 1.848300  | -6.593983 |
| H | -2.704367 | 0.300213  | -6.496951 |
| H | -1.276235 | -0.683010 | -6.810380 |
| H | -3.148344 | -2.240172 | -5.922607 |
| H | -1.516231 | -2.772181 | -5.529954 |
| H | -3.925780 | -2.595581 | -3.656453 |
| H | -2.964053 | -4.018158 | -4.079902 |
| H | -1.003220 | -3.068263 | -2.884285 |
| H | -2.388819 | -3.064871 | -1.789287 |
| H | -0.954097 | 1.483890  | -1.838057 |
| O | -0.575355 | 1.920734  | -1.005624 |
| C | -0.702620 | 1.105279  | 0.079157  |
| O | -2.041415 | 0.648476  | 0.093177  |
| C | -2.482942 | -0.175632 | 1.182620  |
| H | -1.634916 | -0.707688 | 1.622209  |
| H | -3.146383 | -0.922358 | 0.737941  |
| C | -3.234181 | 0.653512  | 2.214060  |
| H | -4.040085 | 1.185871  | 1.696163  |
| H | -3.715440 | -0.023872 | 2.930460  |
| C | -2.345776 | 1.652092  | 2.960651  |
| H | -1.676382 | 1.109876  | 3.641547  |
| H | -2.980103 | 2.276003  | 3.599999  |
| C | -1.499590 | 2.570514  | 2.065470  |
| H | -2.129494 | 3.058790  | 1.314483  |
| H | -1.099045 | 3.368040  | 2.698759  |
| C | -0.298591 | 1.900230  | 1.362342  |
| H | 0.151239  | 1.189350  | 2.062586  |
| C | 0.763199  | 2.987417  | 1.031363  |
| H | 1.499151  | 2.617051  | 0.316088  |
| C | 1.459372  | 3.478342  | 2.218994  |
| H | 0.265597  | 3.816961  | 0.521725  |



|   |           |           |           |
|---|-----------|-----------|-----------|
| C | 2.037598  | 3.866892  | 3.200236  |
| H | 2.552569  | 4.215935  | 4.063904  |
| O | 5.225008  | 1.009069  | -5.534263 |
| O | 0.032440  | -0.138648 | -0.059473 |
| C | 5.934224  | 0.996740  | -4.556048 |
| C | 5.485558  | 0.704309  | -3.139756 |
| H | 5.870187  | 1.499436  | -2.492288 |
| H | 6.002545  | -0.206520 | -2.814550 |
| C | 3.971920  | 0.553774  | -2.998993 |
| H | 3.483888  | 1.480456  | -3.319300 |
| H | 3.621698  | -0.220572 | -3.689190 |
| C | 3.542799  | 0.207059  | -1.569055 |
| H | 3.898212  | 0.985344  | -0.881284 |
| H | 4.037312  | -0.716947 | -1.255341 |
| C | 2.020353  | 0.071866  | -1.450113 |
| H | 1.546745  | 0.984284  | -1.818529 |
| H | 1.664665  | -0.735870 | -2.101476 |
| C | 1.468646  | -0.182299 | -0.040627 |
| H | 1.859207  | 0.560972  | 0.660099  |
| C | 1.794439  | -1.582996 | 0.532724  |
| H | 1.088149  | -1.768024 | 1.347805  |
| C | 3.150038  | -1.752031 | 1.048248  |
| H | 1.585319  | -2.340297 | -0.231535 |
| C | 4.248504  | -1.901427 | 1.514924  |
| H | 5.226096  | -2.025113 | 1.917592  |
| O | 7.261297  | 1.240159  | -4.599022 |
| C | 7.817692  | 1.519847  | -5.914889 |
| C | 9.290052  | 1.767483  | -5.751350 |
| H | 7.300972  | 2.386821  | -6.330101 |
| H | 7.616427  | 0.665889  | -6.564007 |
| C | 9.766827  | 3.052223  | -5.474142 |
| C | 10.203805 | 0.714337  | -5.851165 |
| C | 11.129671 | 3.281366  | -5.301229 |
| H | 9.065514  | 3.877680  | -5.394022 |
| C | 11.567775 | 0.939380  | -5.679390 |
| H | 9.844457  | -0.287953 | -6.065617 |
| H | 11.487037 | 4.283949  | -5.089607 |
| C | 12.032997 | 2.224282  | -5.403941 |
| H | 12.266946 | 0.113613  | -5.762919 |
| H | 13.095543 | 2.401871  | -5.272793 |
| H | -1.663745 | -0.809507 | -1.661877 |

85 atoms

addition of another 3-isomer unit to the 7-isomer chain end,  
structure I3, in toluene

|   |           |           |           |
|---|-----------|-----------|-----------|
| N | -2.497578 | -1.007262 | -4.807319 |
|---|-----------|-----------|-----------|

|   |           |           |           |
|---|-----------|-----------|-----------|
| C | -2.182842 | -0.404301 | -3.611119 |
| N | -1.223367 | 0.461451  | -3.443283 |
| C | -0.466839 | 0.881769  | -4.612520 |
| C | -0.285428 | -0.259641 | -5.610535 |
| C | -1.654160 | -0.811544 | -5.988446 |
| C | -4.587545 | -1.928798 | -3.832450 |
| C | -3.842754 | -1.870131 | -2.505248 |
| N | -2.968935 | -0.712231 | -2.528620 |
| C | -3.575628 | -1.983295 | -4.970170 |
| H | 0.505553  | 1.253658  | -4.277810 |
| H | -0.964234 | 1.728643  | -5.110828 |
| H | 0.317562  | -1.048524 | -5.148871 |
| H | 0.240402  | 0.073045  | -6.510071 |
| H | -2.160535 | -0.136763 | -6.692226 |
| H | -1.550366 | -1.777863 | -6.494841 |
| H | -4.071503 | -1.786064 | -5.927229 |
| H | -3.144741 | -2.993206 | -5.041038 |
| H | -5.215457 | -1.038195 | -3.927707 |
| H | -5.238091 | -2.805976 | -3.881409 |
| H | -3.288872 | -2.808210 | -2.341374 |
| H | -4.539064 | -1.755109 | -1.671511 |
| H | -0.814033 | 1.155316  | -1.951690 |
| O | -0.511355 | 1.662663  | -1.127261 |
| C | -0.540131 | 0.885463  | -0.008918 |
| O | -1.853261 | 0.336727  | 0.078074  |
| C | -2.180661 | -0.478716 | 1.214989  |
| H | -1.270588 | -0.904454 | 1.643555  |
| H | -2.777535 | -1.310869 | 0.831097  |
| C | -2.974512 | 0.327934  | 2.232265  |
| H | -3.845401 | 0.754368  | 1.721193  |
| H | -3.363881 | -0.352636 | 2.999568  |
| C | -2.161265 | 1.444539  | 2.893791  |
| H | -1.431451 | 1.004418  | 3.585979  |
| H | -2.834250 | 2.047307  | 3.513527  |
| C | -1.417661 | 2.378635  | 1.925525  |
| H | -2.102646 | 2.768857  | 1.165846  |
| H | -1.072664 | 3.241215  | 2.503760  |
| C | -0.180244 | 1.768916  | 1.230363  |
| H | 0.330525  | 1.125778  | 1.953985  |
| C | 0.797208  | 2.910558  | 0.832878  |
| H | 1.557416  | 2.554232  | 0.135783  |
| C | 1.459993  | 3.515046  | 1.986922  |
| H | 0.240087  | 3.672645  | 0.281298  |
| C | 2.013184  | 3.997452  | 2.940572  |
| H | 2.504902  | 4.429871  | 3.779721  |
| O | 5.438316  | 1.355931  | -5.506015 |
| O | 0.276353  | -0.295122 | -0.108644 |

|   |           |           |           |
|---|-----------|-----------|-----------|
| C | 6.146486  | 1.284184  | -4.529691 |
| C | 5.699509  | 0.893564  | -3.136912 |
| H | 6.062994  | 1.656517  | -2.440190 |
| H | 6.236686  | -0.022890 | -2.865001 |
| C | 4.189272  | 0.700510  | -3.011377 |
| H | 3.681199  | 1.631864  | -3.283608 |
| H | 3.858696  | -0.043804 | -3.743164 |
| C | 3.767151  | 0.268108  | -1.602897 |
| H | 4.110282  | 1.013309  | -0.873660 |
| H | 4.279693  | -0.662400 | -1.341037 |
| C | 2.248267  | 0.097170  | -1.487473 |
| H | 1.755922  | 1.017464  | -1.809865 |
| H | 1.901968  | -0.684732 | -2.174194 |
| C | 1.710690  | -0.238308 | -0.089619 |
| H | 2.051717  | 0.505019  | 0.637849  |
| C | 2.128034  | -1.634599 | 0.433934  |
| H | 1.415576  | -1.907844 | 1.218084  |
| C | 3.477465  | -1.720415 | 0.984831  |
| H | 1.998744  | -2.371769 | -0.366573 |
| C | 4.570479  | -1.804083 | 1.479946  |
| H | 5.543184  | -1.869142 | 1.907383  |
| O | 7.471099  | 1.543552  | -4.553392 |
| C | 8.026371  | 1.918046  | -5.845883 |
| C | 9.495402  | 2.171226  | -5.661923 |
| H | 7.500595  | 2.804839  | -6.203626 |
| H | 7.836181  | 1.107030  | -6.551163 |
| C | 9.961650  | 3.451217  | -5.348331 |
| C | 10.416562 | 1.126020  | -5.778715 |
| C | 11.321599 | 3.684015  | -5.156589 |
| H | 9.254713  | 4.270412  | -5.254541 |
| C | 11.777118 | 1.354490  | -5.587398 |
| H | 10.065255 | 0.127393  | -6.021671 |
| H | 11.670775 | 4.683159  | -4.916877 |
| C | 12.232018 | 2.635081  | -5.275909 |
| H | 12.482062 | 0.535084  | -5.684088 |
| H | 13.292146 | 2.815386  | -5.129732 |
| H | -2.619868 | -0.348721 | -1.647655 |

85 atoms

addition of another 3-isomer unit to the 7-isomer chain end,  
structure TSr, in toluene

|   |           |           |           |
|---|-----------|-----------|-----------|
| N | -1.986549 | -0.598945 | -4.948917 |
| C | -1.820077 | -0.129652 | -3.666565 |
| N | -0.967951 | 0.792953  | -3.316234 |
| C | -0.191595 | 1.435687  | -4.365290 |
| C | 0.187963  | 0.452611  | -5.470223 |

|   |           |           |           |
|---|-----------|-----------|-----------|
| C | -1.080179 | -0.185461 | -6.023038 |
| C | -4.038887 | -1.821451 | -4.271158 |
| C | -3.405190 | -1.865594 | -2.886760 |
| N | -2.644561 | -0.644781 | -2.698674 |
| C | -2.943807 | -1.643197 | -5.315284 |
| H | 0.706067  | 1.868309  | -3.914298 |
| H | -0.751756 | 2.278699  | -4.799648 |
| H | 0.842321  | -0.319695 | -5.053661 |
| H | 0.736345  | 0.945728  | -6.277815 |
| H | -1.602628 | 0.512088  | -6.691966 |
| H | -0.833554 | -1.071463 | -6.619056 |
| H | -3.383270 | -1.377032 | -6.283085 |
| H | -2.408220 | -2.592870 | -5.463184 |
| H | -4.741920 | -0.984536 | -4.314613 |
| H | -4.595015 | -2.739205 | -4.479724 |
| H | -2.779575 | -2.766643 | -2.786434 |
| H | -4.170531 | -1.914109 | -2.108865 |
| H | -0.723868 | 1.311176  | -1.719811 |
| O | -0.517263 | 1.744196  | -0.826166 |
| C | -0.606248 | 0.868755  | 0.212805  |
| O | -1.855976 | 0.195054  | 0.090689  |
| C | -2.189011 | -0.813790 | 1.061050  |
| H | -1.276918 | -1.214284 | 1.507349  |
| H | -2.661191 | -1.626831 | 0.502366  |
| C | -3.141859 | -0.254774 | 2.106051  |
| H | -4.017930 | 0.152995  | 1.588427  |
| H | -3.503613 | -1.080061 | 2.731894  |
| C | -2.508728 | 0.826399  | 2.985320  |
| H | -1.765992 | 0.369100  | 3.652273  |
| H | -3.282546 | 1.241224  | 3.640643  |
| C | -1.843702 | 1.982706  | 2.221902  |
| H | -2.527614 | 2.382999  | 1.466008  |
| H | -1.669851 | 2.790692  | 2.939003  |
| C | -0.484166 | 1.667143  | 1.560065  |
| H | 0.093041  | 1.046686  | 2.252683  |
| C | 0.289027  | 3.001775  | 1.356490  |
| H | 1.136548  | 2.868361  | 0.683179  |
| C | 0.765153  | 3.578965  | 2.612054  |
| H | -0.367573 | 3.712589  | 0.847045  |
| C | 1.166295  | 4.043571  | 3.647169  |
| H | 1.524616  | 4.459292  | 4.559132  |
| O | 5.219622  | 0.813020  | -5.603208 |
| O | 0.339321  | -0.212263 | 0.130791  |
| C | 5.963608  | 0.958206  | -4.662122 |
| C | 5.574623  | 0.866999  | -3.201791 |
| H | 5.797759  | 1.836162  | -2.740391 |
| H | 6.253102  | 0.156179  | -2.717531 |

|   |           |           |           |
|---|-----------|-----------|-----------|
| C | 4.113764  | 0.478608  | -2.981789 |
| H | 3.467400  | 1.197796  | -3.495019 |
| H | 3.921292  | -0.488381 | -3.459100 |
| C | 3.740392  | 0.407649  | -1.497062 |
| H | 3.930318  | 1.381312  | -1.027184 |
| H | 4.399457  | -0.302470 | -0.989199 |
| C | 2.271747  | 0.018360  | -1.294324 |
| H | 1.635999  | 0.696462  | -1.867598 |
| H | 2.087721  | -0.984267 | -1.699743 |
| C | 1.751356  | 0.047292  | 0.148084  |
| H | 1.956413  | 1.021602  | 0.597031  |
| C | 2.346444  | -1.043431 | 1.072182  |
| H | 1.684224  | -1.129873 | 1.939082  |
| C | 3.703019  | -0.794849 | 1.552175  |
| H | 2.300052  | -2.009514 | 0.556400  |
| C | 4.803444  | -0.591117 | 1.993082  |
| H | 5.781097  | -0.404941 | 2.370713  |
| O | 7.278802  | 1.233405  | -4.792041 |
| C | 7.774370  | 1.358720  | -6.155055 |
| C | 9.246235  | 1.650216  | -6.087649 |
| H | 7.221640  | 2.158743  | -6.650718 |
| H | 7.566116  | 0.427755  | -6.685002 |
| C | 9.706776  | 2.968147  | -6.013919 |
| C | 10.177026 | 0.607231  | -6.075759 |
| C | 11.070398 | 3.239807  | -5.931491 |
| H | 8.992398  | 3.786216  | -6.022086 |
| C | 11.541548 | 0.874646  | -5.993526 |
| H | 9.830243  | -0.420512 | -6.132275 |
| H | 11.414942 | 4.267479  | -5.878172 |
| C | 11.990570 | 2.192501  | -5.921382 |
| H | 12.253876 | 0.055949  | -5.988636 |
| H | 13.053525 | 2.402633  | -5.860521 |
| H | -2.408997 | -0.353379 | -1.755563 |

85 atoms

addition of another 3-isomer unit to the 7-isomer chain end,  
structure I3r, in toluene

|   |           |          |           |
|---|-----------|----------|-----------|
| N | -2.873971 | 4.237417 | 0.078538  |
| C | -3.120808 | 2.888208 | -0.008745 |
| N | -3.129935 | 2.063138 | 1.001180  |
| C | -2.936241 | 2.610084 | 2.336668  |
| C | -1.966669 | 3.789333 | 2.330001  |
| C | -2.465753 | 4.842196 | 1.348450  |
| C | -3.576130 | 4.552239 | -2.283247 |
| C | -3.130960 | 3.108365 | -2.474549 |
| N | -3.417458 | 2.382775 | -1.250957 |

|   |           |           |           |
|---|-----------|-----------|-----------|
| C | -2.859426 | 5.139912  | -1.073752 |
| H | -2.558759 | 1.813546  | 2.982413  |
| H | -3.899548 | 2.928736  | 2.764753  |
| H | -0.975936 | 3.436671  | 2.025286  |
| H | -1.867396 | 4.231270  | 3.325761  |
| H | -3.309995 | 5.399705  | 1.776549  |
| H | -1.677299 | 5.573150  | 1.136783  |
| H | -3.333517 | 6.081027  | -0.773922 |
| H | -1.817989 | 5.380527  | -1.334166 |
| H | -4.658622 | 4.573080  | -2.127700 |
| H | -3.351808 | 5.154408  | -3.167498 |
| H | -2.062121 | 3.075450  | -2.739700 |
| H | -3.681777 | 2.634012  | -3.289920 |
| H | -3.651368 | 0.448505  | 0.903887  |
| O | -4.033916 | -0.484362 | 0.997115  |
| C | -3.569844 | -1.374653 | 0.067414  |
| O | -3.290334 | -0.613607 | -1.114325 |
| C | -3.042221 | -1.320610 | -2.338681 |
| H | -2.621826 | -2.306689 | -2.123850 |
| H | -2.272203 | -0.747763 | -2.862595 |
| C | -4.310929 | -1.399005 | -3.182356 |
| H | -4.696426 | -0.379035 | -3.298921 |
| H | -4.041919 | -1.744560 | -4.188184 |
| C | -5.406247 | -2.304733 | -2.605814 |
| H | -5.113846 | -3.354312 | -2.737728 |
| H | -6.316797 | -2.171212 | -3.200386 |
| C | -5.739378 | -2.080966 | -1.121320 |
| H | -6.010598 | -1.036442 | -0.935037 |
| H | -6.626643 | -2.676804 | -0.887956 |
| C | -4.610150 | -2.498754 | -0.161399 |
| H | -4.068224 | -3.342198 | -0.598362 |
| C | -5.149799 | -2.974876 | 1.209564  |
| H | -4.306493 | -3.134445 | 1.887131  |
| C | -5.928686 | -4.207954 | 1.123190  |
| H | -5.756052 | -2.180913 | 1.653829  |
| C | -6.562454 | -5.228186 | 1.046675  |
| H | -7.123267 | -6.130832 | 0.987216  |
| O | 4.851717  | -1.962654 | -1.711726 |
| O | -2.385163 | -2.055643 | 0.469901  |
| C | 4.898448  | -1.173504 | -0.798160 |
| C | 3.730740  | -0.747046 | 0.066132  |
| H | 3.614827  | 0.337172  | -0.048652 |
| H | 4.017114  | -0.895019 | 1.113078  |
| C | 2.428182  | -1.475561 | -0.260235 |
| H | 2.187031  | -1.330027 | -1.318344 |
| H | 2.575530  | -2.553565 | -0.134211 |
| C | 1.259572  | -1.004832 | 0.612535  |

|   |           |           |           |
|---|-----------|-----------|-----------|
| H | 1.106473  | 0.072179  | 0.468185  |
| H | 1.518947  | -1.130172 | 1.667624  |
| C | -0.037172 | -1.755392 | 0.290580  |
| H | -0.228038 | -1.693207 | -0.786297 |
| H | 0.083030  | -2.822436 | 0.514874  |
| C | -1.305813 | -1.257889 | 0.989290  |
| H | -1.475958 | -0.205585 | 0.748019  |
| C | -1.325255 | -1.431972 | 2.527957  |
| H | -2.366612 | -1.319657 | 2.840105  |
| C | -0.510874 | -0.490579 | 3.291941  |
| H | -1.033312 | -2.460463 | 2.770830  |
| C | 0.125511  | 0.291956  | 3.948531  |
| H | 0.700977  | 0.978178  | 4.523627  |
| O | 6.031001  | -0.544263 | -0.418279 |
| C | 7.227391  | -0.865418 | -1.183229 |
| C | 8.366300  | -0.064973 | -0.619273 |
| H | 7.040446  | -0.627505 | -2.231785 |
| H | 7.406254  | -1.939429 | -1.109057 |
| C | 8.643620  | 1.215969  | -1.105925 |
| C | 9.152875  | -0.579794 | 0.415389  |
| C | 9.686775  | 1.968073  | -0.570955 |
| H | 8.039106  | 1.625676  | -1.909936 |
| C | 10.197062 | 0.169047  | 0.953119  |
| H | 8.946469  | -1.573913 | 0.801020  |
| H | 9.893913  | 2.959633  | -0.960334 |
| C | 10.465829 | 1.445114  | 0.460229  |
| H | 10.802292 | -0.243783 | 1.753688  |
| H | 11.281202 | 2.028379  | 0.875797  |
| H | -3.437910 | 1.369065  | -1.278275 |

85 atoms

addition of another 3-isomer unit to the 7-isomer chain end,  
structure TSr2, in toluene

|   |           |          |           |
|---|-----------|----------|-----------|
| N | -3.581015 | 4.362132 | 0.089651  |
| C | -3.595488 | 2.993228 | -0.033475 |
| N | -3.992916 | 2.163940 | 0.888127  |
| C | -4.518661 | 2.714857 | 2.128230  |
| C | -3.798385 | 4.002087 | 2.523507  |
| C | -3.889095 | 4.997598 | 1.373222  |
| C | -3.056019 | 4.606804 | -2.327459 |
| C | -2.416158 | 3.230657 | -2.195148 |
| N | -3.195746 | 2.466063 | -1.238828 |
| C | -3.106868 | 5.269957 | -0.956150 |
| H | -4.408539 | 1.958944 | 2.910539  |
| H | -5.598605 | 2.909588 | 2.036701  |
| H | -2.748743 | 3.773635 | 2.735214  |

|   |           |           |           |
|---|-----------|-----------|-----------|
| H | -4.229357 | 4.442835  | 3.427169  |
| H | -4.891233 | 5.445176  | 1.328575  |
| H | -3.180495 | 5.819924  | 1.522469  |
| H | -3.773345 | 6.139337  | -0.980971 |
| H | -2.109274 | 5.645641  | -0.684291 |
| H | -4.066792 | 4.491087  | -2.729184 |
| H | -2.491024 | 5.240108  | -3.016354 |
| H | -1.362267 | 3.331505  | -1.891123 |
| H | -2.429116 | 2.700284  | -3.149861 |
| H | -3.795648 | 0.486726  | 0.904099  |
| O | -3.726415 | -0.486039 | 1.174918  |
| C | -3.343552 | -1.345003 | 0.176437  |
| O | -3.114115 | -0.539903 | -0.984135 |
| C | -2.982678 | -1.192661 | -2.257171 |
| H | -2.580318 | -2.200408 | -2.123690 |
| H | -2.233140 | -0.617732 | -2.807893 |
| C | -4.311405 | -1.186216 | -3.006491 |
| H | -4.674478 | -0.152040 | -3.024733 |
| H | -4.126863 | -1.469698 | -4.050014 |
| C | -5.383728 | -2.104637 | -2.408112 |
| H | -5.129706 | -3.149165 | -2.629256 |
| H | -6.333037 | -1.912410 | -2.920142 |
| C | -5.595649 | -1.971662 | -0.891331 |
| H | -5.836445 | -0.937600 | -0.621122 |
| H | -6.470977 | -2.571186 | -0.624894 |
| C | -4.400257 | -2.456955 | -0.050928 |
| H | -3.900146 | -3.274051 | -0.578797 |
| C | -4.840717 | -3.014056 | 1.324856  |
| H | -3.950811 | -3.217648 | 1.926676  |
| C | -5.635105 | -4.235829 | 1.222860  |
| H | -5.405084 | -2.244861 | 1.858922  |
| C | -6.283038 | -5.246059 | 1.133147  |
| H | -6.855007 | -6.140781 | 1.061510  |
| O | 5.026365  | -2.124145 | -1.846831 |
| O | -2.150530 | -2.038050 | 0.513564  |
| C | 5.114965  | -1.330384 | -0.940311 |
| C | 3.975291  | -0.852695 | -0.065399 |
| H | 3.883203  | 0.230606  | -0.208204 |
| H | 4.277834  | -0.979055 | 0.979657  |
| C | 2.649900  | -1.557529 | -0.348781 |
| H | 2.392977  | -1.434048 | -1.405906 |
| H | 2.774286  | -2.635145 | -0.196926 |
| C | 1.508370  | -1.037388 | 0.531673  |
| H | 1.376110  | 0.038653  | 0.361703  |
| H | 1.784653  | -1.140020 | 1.585224  |
| C | 0.190532  | -1.768421 | 0.254388  |
| H | -0.024800 | -1.726936 | -0.819037 |



|   |           |           |           |
|---|-----------|-----------|-----------|
| H | 0.296352  | -2.832293 | 0.499956  |
| C | -1.049839 | -1.233856 | 0.975026  |
| H | -1.226100 | -0.191808 | 0.698127  |
| C | -1.009902 | -1.336706 | 2.519451  |
| H | -2.042908 | -1.248675 | 2.862445  |
| C | -0.213482 | -0.314742 | 3.193872  |
| H | -0.660563 | -2.335847 | 2.805620  |
| C | 0.406966  | 0.542357  | 3.767085  |
| H | 0.965950  | 1.294943  | 4.271010  |
| O | 6.275269  | -0.741658 | -0.580177 |
| C | 7.448988  | -1.116310 | -1.355610 |
| C | 8.629440  | -0.373530 | -0.798106 |
| H | 7.266588  | -0.866597 | -2.402174 |
| H | 7.576077  | -2.197989 | -1.285516 |
| C | 9.011055  | 0.860225  | -1.332685 |
| C | 9.352429  | -0.896540 | 0.278468  |
| C | 10.094989 | 1.558167  | -0.804454 |
| H | 8.456766  | 1.275980  | -2.169122 |
| C | 10.435766 | -0.201576 | 0.810123  |
| H | 9.064707  | -1.854638 | 0.701428  |
| H | 10.383323 | 2.513266  | -1.231487 |
| C | 10.809302 | 1.027913  | 0.268588  |
| H | 10.990520 | -0.620113 | 1.643632  |
| H | 11.655755 | 1.568755  | 0.679361  |
| H | -3.098358 | 1.457315  | -1.215842 |

85 atoms

addition of another 3-isomer unit to the 7-isomer chain end,  
structure I3r2, in toluene

|   |           |          |           |
|---|-----------|----------|-----------|
| N | -4.961848 | 4.250334 | -0.029228 |
| C | -4.447199 | 2.977119 | -0.066910 |
| N | -4.823630 | 1.996020 | 0.706869  |
| C | -5.913655 | 2.240336 | 1.639611  |
| C | -5.876615 | 3.664484 | 2.190009  |
| C | -5.897716 | 4.647403 | 1.025896  |
| C | -3.759003 | 4.835017 | -2.125401 |
| C | -2.759356 | 3.769725 | -1.693303 |
| N | -3.492351 | 2.714784 | -1.017660 |
| C | -4.513994 | 5.338378 | -0.900984 |
| H | -5.836977 | 1.513599 | 2.453360  |
| H | -6.885815 | 2.059185 | 1.155209  |
| H | -4.960176 | 3.799699 | 2.773602  |
| H | -6.723354 | 3.861872 | 2.853830  |
| H | -6.909488 | 4.725282 | 0.605440  |
| H | -5.617803 | 5.650314 | 1.367000  |
| H | -5.394902 | 5.912863 | -1.208479 |

|   |           |           |           |
|---|-----------|-----------|-----------|
| H | -3.876520 | 6.023590  | -0.323263 |
| H | -4.455846 | 4.397902  | -2.846387 |
| H | -3.255705 | 5.674730  | -2.611606 |
| H | -1.984785 | 4.215328  | -1.050176 |
| H | -2.252380 | 3.334196  | -2.556867 |
| H | -3.793237 | 0.684094  | 0.993861  |
| O | -3.148618 | -0.037223 | 1.289894  |
| C | -2.876971 | -0.948751 | 0.297029  |
| O | -2.589844 | -0.166353 | -0.873461 |
| C | -2.487976 | -0.833686 | -2.141523 |
| H | -2.144480 | -1.862270 | -1.998285 |
| H | -1.703305 | -0.304835 | -2.689059 |
| C | -3.806112 | -0.762716 | -2.906599 |
| H | -4.114746 | 0.288359  | -2.937146 |
| H | -3.623855 | -1.064464 | -3.945469 |
| C | -4.932012 | -1.618958 | -2.315112 |
| H | -4.725411 | -2.678066 | -2.516223 |
| H | -5.861940 | -1.388670 | -2.846868 |
| C | -5.164066 | -1.449778 | -0.804848 |
| H | -5.360312 | -0.400517 | -0.559587 |
| H | -6.071810 | -2.002881 | -0.545351 |
| C | -4.010441 | -1.986186 | 0.064226  |
| H | -3.553250 | -2.839425 | -0.445410 |
| C | -4.502155 | -2.499792 | 1.439830  |
| H | -3.633966 | -2.733297 | 2.061805  |
| C | -5.350757 | -3.684986 | 1.340727  |
| H | -5.042182 | -1.700220 | 1.955168  |
| C | -6.044197 | -4.664761 | 1.253809  |
| H | -6.655123 | -5.533502 | 1.183886  |
| O | 5.349284  | -2.644970 | -1.726649 |
| O | -1.749395 | -1.712973 | 0.655696  |
| C | 5.522982  | -1.777433 | -0.903951 |
| C | 4.447938  | -1.135325 | -0.052743 |
| H | 4.452409  | -0.060820 | -0.270287 |
| H | 4.756939  | -1.216578 | 0.995143  |
| C | 3.059437  | -1.734374 | -0.269358 |
| H | 2.795183  | -1.660383 | -1.329398 |
| H | 3.089364  | -2.806007 | -0.044858 |
| C | 1.985011  | -1.054155 | 0.586043  |
| H | 1.947716  | 0.015607  | 0.344424  |
| H | 2.268119  | -1.111091 | 1.641177  |
| C | 0.602241  | -1.678705 | 0.371295  |
| H | 0.374994  | -1.685833 | -0.700363 |
| H | 0.616000  | -2.730218 | 0.684013  |
| C | -0.572662 | -0.987769 | 1.068114  |
| H | -0.659196 | 0.046889  | 0.731603  |
| C | -0.525609 | -1.010759 | 2.615087  |

|   |           |           |           |
|---|-----------|-----------|-----------|
| H | -1.540390 | -0.804284 | 2.961101  |
| C | 0.374699  | -0.036227 | 3.226022  |
| H | -0.269973 | -2.022096 | 2.953020  |
| C | 1.082593  | 0.785229  | 3.747536  |
| H | 1.716499  | 1.507915  | 4.204355  |
| O | 6.733769  | -1.246928 | -0.629485 |
| C | 7.853125  | -1.782945 | -1.390677 |
| C | 9.099792  | -1.076568 | -0.940331 |
| H | 7.655655  | -1.626323 | -2.452526 |
| H | 7.906130  | -2.858586 | -1.213852 |
| C | 9.528301  | 0.088659  | -1.582734 |
| C | 9.838755  | -1.562141 | 0.142689  |
| C | 10.673330 | 0.755874  | -1.153436 |
| H | 8.961983  | 0.474792  | -2.425278 |
| C | 10.983815 | -0.897776 | 0.575372  |
| H | 9.514886  | -2.466705 | 0.649113  |
| H | 10.997203 | 1.657490  | -1.663244 |
| C | 11.403302 | 0.263180  | -0.072843 |
| H | 11.550184 | -1.287032 | 1.415236  |
| H | 12.297299 | 0.779984  | 0.260965  |
| H | -3.075038 | 1.793115  | -0.942736 |

85 atoms

addition of another 3-isomer unit to the 7-isomer chain end,  
structure TS34, in toluene

|   |           |          |           |
|---|-----------|----------|-----------|
| N | -3.626908 | 4.207842 | -0.076607 |
| C | -3.497974 | 2.857053 | -0.077652 |
| N | -4.191777 | 2.117482 | 0.804260  |
| C | -5.111192 | 2.695761 | 1.773403  |
| C | -4.603278 | 4.068633 | 2.196697  |
| C | -4.382615 | 4.925751 | 0.956631  |
| C | -2.594411 | 4.231160 | -2.330623 |
| C | -1.860554 | 2.977709 | -1.865955 |
| N | -2.699023 | 2.234778 | -0.937943 |
| C | -3.014737 | 5.047005 | -1.114007 |
| H | -5.167679 | 2.012350 | 2.621255  |
| H | -6.120425 | 2.776092 | 1.349836  |
| H | -3.664326 | 3.954793 | 2.746211  |
| H | -5.319098 | 4.562756 | 2.857723  |
| H | -5.343291 | 5.251832 | 0.537753  |
| H | -3.819938 | 5.828903 | 1.211952  |
| H | -3.744196 | 5.811689 | -1.398762 |
| H | -2.151212 | 5.569778 | -0.683824 |
| H | -3.475356 | 3.939732 | -2.910131 |
| H | -1.959896 | 4.843225 | -2.976157 |
| H | -0.905615 | 3.248192 | -1.395948 |

|   |           |           |           |
|---|-----------|-----------|-----------|
| H | -1.630119 | 2.319076  | -2.704372 |
| H | -3.932058 | 1.130166  | 0.910260  |
| O | -3.416328 | -0.488748 | 1.408297  |
| C | -3.159952 | -1.425135 | 0.644895  |
| O | -2.778481 | -0.352705 | -1.097384 |
| C | -3.000491 | -0.864930 | -2.370121 |
| H | -2.672484 | -1.920250 | -2.437134 |
| H | -2.385877 | -0.328438 | -3.120907 |
| C | -4.469748 | -0.768782 | -2.813829 |
| H | -4.791072 | 0.271332  | -2.668964 |
| H | -4.541108 | -0.968036 | -3.892943 |
| C | -5.439787 | -1.708279 | -2.085168 |
| H | -5.250770 | -2.741489 | -2.405529 |
| H | -6.458443 | -1.479656 | -2.423132 |
| C | -5.427522 | -1.670027 | -0.546597 |
| H | -5.477662 | -0.638892 | -0.186787 |
| H | -6.345169 | -2.159499 | -0.204142 |
| C | -4.226674 | -2.378434 | 0.112509  |
| H | -3.745883 | -3.047107 | -0.603694 |
| C | -4.667877 | -3.246539 | 1.329922  |
| H | -3.778536 | -3.635933 | 1.835553  |
| C | -5.530152 | -4.366679 | 0.965066  |
| H | -5.181559 | -2.604137 | 2.053541  |
| C | -6.235208 | -5.291381 | 0.655322  |
| H | -6.855214 | -6.112917 | 0.384294  |
| O | 5.179282  | -2.297865 | -1.759736 |
| O | -1.955835 | -2.072768 | 0.695463  |
| C | 5.277971  | -1.462988 | -0.892413 |
| C | 4.156287  | -0.967683 | -0.004527 |
| H | 4.070041  | 0.114937  | -0.154024 |
| H | 4.477216  | -1.088004 | 1.036192  |
| C | 2.820644  | -1.665489 | -0.255243 |
| H | 2.533419  | -1.535661 | -1.303699 |
| H | 2.944088  | -2.744248 | -0.111925 |
| C | 1.707824  | -1.143156 | 0.659995  |
| H | 1.581881  | -0.064317 | 0.503612  |
| H | 2.011995  | -1.259669 | 1.704650  |
| C | 0.374944  | -1.855841 | 0.409242  |
| H | 0.116998  | -1.780517 | -0.651634 |
| H | 0.478172  | -2.926353 | 0.626158  |
| C | -0.828064 | -1.316792 | 1.182566  |
| H | -0.999997 | -0.267367 | 0.941425  |
| C | -0.764105 | -1.486439 | 2.719837  |
| H | -1.786068 | -1.387399 | 3.093087  |
| C | 0.068827  | -0.510501 | 3.417783  |
| H | -0.431379 | -2.503306 | 2.959421  |
| C | 0.721887  | 0.305725  | 4.013687  |

|   |           |           |           |
|---|-----------|-----------|-----------|
| H | 1.310236  | 1.023362  | 4.534845  |
| O | 6.437959  | -0.839609 | -0.591329 |
| C | 7.596669  | -1.232379 | -1.379504 |
| C | 8.780045  | -0.450761 | -0.884530 |
| H | 7.384878  | -1.030399 | -2.430899 |
| H | 7.741336  | -2.308210 | -1.266701 |
| C | 9.117410  | 0.774486  | -1.466570 |
| C | 9.549916  | -0.927697 | 0.180757  |
| C | 10.203425 | 1.509130  | -0.995709 |
| H | 8.526421  | 1.154470  | -2.294844 |
| C | 10.635893 | -0.196056 | 0.654997  |
| H | 9.296914  | -1.878754 | 0.640197  |
| H | 10.457012 | 2.457098  | -1.459167 |
| C | 10.964805 | 1.024531  | 0.066632  |
| H | 11.227284 | -0.579246 | 1.480289  |
| H | 11.813116 | 1.593918  | 0.432610  |
| H | -2.734920 | 1.140837  | -1.000307 |

85 atoms

addition of another 3-isomer unit to the 7-isomer chain end,  
structure I4, in toluene

|   |           |           |           |
|---|-----------|-----------|-----------|
| N | -1.358200 | 4.087571  | 0.027770  |
| C | -1.929688 | 2.836803  | -0.035700 |
| N | -2.929193 | 2.564658  | 0.856936  |
| C | -3.506607 | 3.538805  | 1.762136  |
| C | -2.406707 | 4.479939  | 2.237802  |
| C | -1.722659 | 5.094771  | 1.023742  |
| C | -0.443847 | 3.625342  | -2.221727 |
| C | -0.438402 | 2.175848  | -1.738756 |
| N | -1.570486 | 1.896889  | -0.868343 |
| C | -0.433044 | 4.548786  | -1.009620 |
| H | -3.954415 | 2.999938  | 2.599384  |
| H | -4.310702 | 4.115244  | 1.280328  |
| H | -1.682205 | 3.915890  | 2.832728  |
| H | -2.815057 | 5.274138  | 2.868420  |
| H | -2.378881 | 5.848726  | 0.563632  |
| H | -0.808135 | 5.617194  | 1.326561  |
| H | -0.722394 | 5.566125  | -1.299288 |
| H | 0.578903  | 4.615498  | -0.587120 |
| H | -1.346252 | 3.800507  | -2.816700 |
| H | 0.418381  | 3.844976  | -2.858422 |
| H | 0.513758  | 1.969308  | -1.223229 |
| H | -0.482169 | 1.485799  | -2.585995 |
| H | -3.287170 | 1.618688  | 0.849721  |
| O | -4.046722 | -0.214142 | 1.068697  |
| C | -3.862039 | -1.279262 | 0.516363  |

|   |           |           |           |
|---|-----------|-----------|-----------|
| O | -3.029582 | -0.226601 | -1.890369 |
| C | -3.931246 | 0.343350  | -2.822762 |
| H | -4.016727 | -0.353061 | -3.666708 |
| H | -3.514664 | 1.279172  | -3.221322 |
| C | -5.330608 | 0.632805  | -2.268372 |
| H | -5.241710 | 1.264013  | -1.376654 |
| H | -5.841873 | 1.245308  | -3.023222 |
| C | -6.225317 | -0.588701 | -1.974918 |
| H | -6.049436 | -1.357490 | -2.739113 |
| H | -7.266575 | -0.275840 | -2.114702 |
| C | -6.163907 | -1.239845 | -0.581301 |
| H | -6.294407 | -0.474631 | 0.189415  |
| H | -7.033413 | -1.900005 | -0.507838 |
| C | -4.915286 | -2.074124 | -0.244745 |
| H | -4.428011 | -2.424212 | -1.156679 |
| C | -5.268974 | -3.331089 | 0.608795  |
| H | -4.345716 | -3.828719 | 0.916836  |
| C | -6.109118 | -4.290148 | -0.102277 |
| H | -5.777759 | -3.014467 | 1.527324  |
| C | -6.793827 | -5.081344 | -0.695409 |
| H | -7.397093 | -5.785313 | -1.218467 |
| O | 4.553295  | -2.773695 | -1.289718 |
| O | -2.707397 | -1.960306 | 0.583155  |
| C | 4.628106  | -1.831781 | -0.537323 |
| C | 3.485080  | -1.241421 | 0.261184  |
| H | 3.459419  | -0.163988 | 0.064895  |
| H | 3.743833  | -1.333909 | 1.322601  |
| C | 2.134008  | -1.890998 | -0.032490 |
| H | 1.901453  | -1.780939 | -1.096817 |
| H | 2.204615  | -2.968648 | 0.147515  |
| C | 1.003488  | -1.293554 | 0.812053  |
| H | 0.934102  | -0.215176 | 0.624294  |
| H | 1.245319  | -1.401497 | 1.873417  |
| C | -0.347557 | -1.946946 | 0.501604  |
| H | -0.545571 | -1.871015 | -0.571962 |
| H | -0.310882 | -3.018064 | 0.734814  |
| C | -1.551694 | -1.326912 | 1.207073  |
| H | -1.604751 | -0.257341 | 1.003490  |
| C | -1.651059 | -1.578908 | 2.727889  |
| H | -2.681122 | -1.374225 | 3.033068  |
| C | -0.767675 | -0.753667 | 3.547398  |
| H | -1.466354 | -2.640308 | 2.929132  |
| C | -0.072222 | -0.065838 | 4.246994  |
| H | 0.553364  | 0.540315  | 4.858781  |
| O | 5.776481  | -1.163683 | -0.295693 |
| C | 6.957577  | -1.649561 | -0.994590 |
| C | 8.125421  | -0.805146 | -0.571269 |

|   |           |           |           |
|---|-----------|-----------|-----------|
| H | 6.774758  | -1.585351 | -2.068605 |
| H | 7.100232  | -2.701199 | -0.740150 |
| C | 8.484713  | 0.330891  | -1.301960 |
| C | 8.857824  | -1.131773 | 0.574172  |
| C | 9.555792  | 1.125165  | -0.898273 |
| H | 7.922915  | 0.593877  | -2.193529 |
| C | 9.928519  | -0.339998 | 0.981626  |
| H | 8.587622  | -2.012806 | 1.149006  |
| H | 9.826974  | 2.002286  | -1.476931 |
| C | 10.279646 | 0.790680  | 0.245020  |
| H | 10.491004 | -0.606668 | 1.870562  |
| H | 11.116309 | 1.406408  | 0.559064  |
| H | -2.545094 | 0.512028  | -1.438796 |

85 atoms

addition of another 3-isomer unit to the 7-isomer chain end,  
structure I5, in toluene

|   |           |           |           |
|---|-----------|-----------|-----------|
| N | 5.578138  | -3.159363 | 1.296918  |
| C | 4.213195  | -2.984995 | 1.267264  |
| N | 3.442870  | -4.119967 | 1.162578  |
| C | 3.957816  | -5.447513 | 1.438499  |
| C | 5.321113  | -5.573446 | 0.770746  |
| C | 6.234546  | -4.467392 | 1.284898  |
| C | 5.717966  | -0.815063 | 2.061956  |
| C | 4.419368  | -0.631121 | 1.277825  |
| N | 3.602744  | -1.833483 | 1.292688  |
| C | 6.470663  | -2.017523 | 1.505235  |
| H | 3.253915  | -6.177221 | 1.032810  |
| H | 4.046719  | -5.645044 | 2.518526  |
| H | 5.196185  | -5.486608 | -0.312465 |
| H | 5.774146  | -6.546029 | 0.980217  |
| H | 6.582403  | -4.709875 | 2.300295  |
| H | 7.129028  | -4.393203 | 0.656304  |
| H | 7.261978  | -2.326445 | 2.197648  |
| H | 6.961625  | -1.758751 | 0.557047  |
| H | 5.478951  | -0.984648 | 3.117194  |
| H | 6.352319  | 0.074640  | 2.006404  |
| H | 4.656566  | -0.336769 | 0.243014  |
| H | 3.832989  | 0.190298  | 1.700029  |
| H | 2.447911  | -3.947704 | 1.249886  |
| O | -1.671450 | -4.001125 | 7.620256  |
| C | -1.472684 | -2.809229 | 7.645105  |
| O | 0.922763  | -2.494347 | 1.304917  |
| C | 0.209941  | -2.071778 | 2.456855  |
| H | -0.808813 | -2.459784 | 2.352206  |
| H | 0.133289  | -0.973956 | 2.479820  |

|   |           |           |           |
|---|-----------|-----------|-----------|
| C | 0.822873  | -2.569112 | 3.768138  |
| H | 0.881846  | -3.663751 | 3.732606  |
| H | 1.854128  | -2.203345 | 3.835336  |
| C | 0.031925  | -2.131216 | 5.004832  |
| H | -0.999044 | -2.498373 | 4.921195  |
| H | -0.035760 | -1.035859 | 5.028134  |
| C | 0.655298  | -2.626192 | 6.314238  |
| H | 0.701679  | -3.720512 | 6.313322  |
| H | 1.686788  | -2.266798 | 6.382943  |
| C | -0.093762 | -2.169477 | 7.577717  |
| H | -0.221016 | -1.084670 | 7.562142  |
| C | 0.666834  | -2.557353 | 8.877085  |
| H | 0.045482  | -2.321302 | 9.748338  |
| C | 1.949421  | -1.875100 | 9.019116  |
| H | 0.815670  | -3.641891 | 8.890299  |
| C | 2.998995  | -1.300025 | 9.136590  |
| H | 3.929930  | -0.795697 | 9.247336  |
| O | -6.739724 | 2.262908  | 3.899242  |
| O | -2.448858 | -1.884483 | 7.761354  |
| C | -6.099478 | 1.485990  | 3.231019  |
| C | -5.255059 | 0.347532  | 3.764648  |
| H | -4.210820 | 0.570698  | 3.514762  |
| H | -5.501209 | -0.553981 | 3.194190  |
| C | -5.419990 | 0.121440  | 5.266503  |
| H | -5.200869 | 1.052921  | 5.797730  |
| H | -6.468932 | -0.106874 | 5.484742  |
| C | -4.523122 | -1.002415 | 5.793872  |
| H | -3.474465 | -0.762458 | 5.587853  |
| H | -4.738996 | -1.931213 | 5.250391  |
| C | -4.707022 | -1.242795 | 7.295272  |
| H | -4.504650 | -0.319899 | 7.851720  |
| H | -5.748851 | -1.508562 | 7.500871  |
| C | -3.827283 | -2.351443 | 7.855857  |
| H | -3.912200 | -3.262757 | 7.261803  |
| C | -4.112058 | -2.683891 | 9.334096  |
| H | -3.358325 | -3.397087 | 9.680182  |
| C | -5.439069 | -3.253504 | 9.545704  |
| H | -3.993181 | -1.773997 | 9.932959  |
| C | -6.530481 | -3.730336 | 9.709574  |
| H | -7.495454 | -4.153887 | 9.860685  |
| O | -6.041657 | 1.535434  | 1.884425  |
| C | -6.795558 | 2.608115  | 1.250206  |
| C | -6.615973 | 2.483785  | -0.235601 |
| H | -6.422389 | 3.561185  | 1.629354  |
| H | -7.842075 | 2.515002  | 1.544702  |
| C | -5.529487 | 3.090944  | -0.872579 |
| C | -7.518945 | 1.740103  | -1.000625 |



|   |           |           |           |
|---|-----------|-----------|-----------|
| C | -5.348379 | 2.958465  | -2.247022 |
| H | -4.821345 | 3.670481  | -0.287523 |
| C | -7.341839 | 1.605889  | -2.375856 |
| H | -8.366171 | 1.263726  | -0.515910 |
| H | -4.501955 | 3.436216  | -2.729639 |
| C | -6.255332 | 2.215205  | -3.001385 |
| H | -8.051790 | 1.028163  | -2.958823 |
| H | -6.116881 | 2.113255  | -4.072895 |
| H | 1.808780  | -2.048455 | 1.281303  |

85 atoms

addition of another 7-isomer unit to the 3-isomer chain end,  
structure 11, in toluene

|   |           |           |           |
|---|-----------|-----------|-----------|
| O | -2.670355 | -0.259157 | -2.587403 |
| O | -4.162065 | -1.065930 | -1.199731 |
| C | -3.078937 | -1.229047 | -1.983897 |
| C | -2.469443 | -2.605746 | -2.127916 |
| H | -1.990894 | -2.863025 | -1.177713 |
| H | -1.674902 | -2.499143 | -2.866786 |
| C | -3.454660 | -3.712376 | -2.553702 |
| H | -4.081332 | -3.351324 | -3.377683 |
| H | -2.865951 | -4.538486 | -2.964175 |
| C | -4.332027 | -4.256588 | -1.421257 |
| H | -3.684058 | -4.691502 | -0.649914 |
| H | -4.938344 | -5.082455 | -1.808266 |
| C | -5.260050 | -3.228399 | -0.766111 |
| H | -6.000140 | -2.860703 | -1.487216 |
| H | -5.821134 | -3.719831 | 0.034676  |
| C | -4.541327 | -2.022165 | -0.168373 |
| H | -3.634901 | -2.312343 | 0.366740  |
| C | -5.420260 | -1.182757 | 0.774465  |
| H | -4.856268 | -0.280755 | 1.032430  |
| C | -5.808058 | -1.895398 | 1.987153  |
| H | -6.313549 | -0.854950 | 0.230370  |
| C | -6.120826 | -2.483488 | 2.988573  |
| H | -6.395415 | -2.999092 | 3.878458  |
| N | -3.376845 | 3.847641  | 0.708839  |
| C | -3.170492 | 2.552339  | 0.284386  |
| N | -3.322329 | 2.310235  | -1.052795 |
| C | -3.414218 | 3.357852  | -2.050204 |
| C | -4.315496 | 4.459042  | -1.507346 |
| C | -3.751807 | 4.948405  | -0.179518 |
| C | -2.253347 | 3.192648  | 2.810692  |
| C | -2.839061 | 1.816217  | 2.504112  |
| N | -2.875168 | 1.553303  | 1.072715  |
| C | -3.077388 | 4.248587  | 2.085051  |

|   |           |           |           |
|---|-----------|-----------|-----------|
| H | -3.826429 | 2.918971  | -2.960686 |
| H | -2.426597 | 3.771534  | -2.307663 |
| H | -5.323864 | 4.059117  | -1.365775 |
| H | -4.381213 | 5.297253  | -2.206148 |
| H | -2.873892 | 5.587280  | -0.358057 |
| H | -4.489844 | 5.569209  | 0.341484  |
| H | -2.536709 | 5.202064  | 2.052588  |
| H | -4.017716 | 4.436376  | 2.621475  |
| H | -1.215100 | 3.226303  | 2.463972  |
| H | -2.249717 | 3.402425  | 3.884491  |
| H | -3.848159 | 1.746246  | 2.941229  |
| H | -2.247451 | 1.028547  | 2.978962  |
| H | -3.132421 | 1.367550  | -1.370334 |
| O | 5.334440  | -1.274413 | 2.405010  |
| C | 5.130468  | -1.289002 | 1.212931  |
| O | -1.570051 | -0.842404 | 0.611696  |
| C | -0.217500 | -0.525046 | 0.326194  |
| H | 0.091223  | 0.372770  | 0.881729  |
| H | -0.088267 | -0.297713 | -0.743863 |
| C | 0.675587  | -1.696318 | 0.715177  |
| H | 0.536052  | -1.898838 | 1.783435  |
| H | 0.331678  | -2.592328 | 0.184092  |
| C | 2.156866  | -1.453119 | 0.411071  |
| H | 2.485824  | -0.540898 | 0.924405  |
| H | 2.285346  | -1.258163 | -0.660967 |
| C | 3.045451  | -2.631894 | 0.822705  |
| H | 2.967648  | -2.796483 | 1.903392  |
| H | 2.683152  | -3.545246 | 0.340450  |
| C | 4.534062  | -2.465699 | 0.456277  |
| H | 4.622263  | -2.262050 | -0.613366 |
| C | 5.360346  | -3.733247 | 0.798238  |
| H | 6.422892  | -3.535054 | 0.618411  |
| C | 4.965102  | -4.907162 | 0.025584  |
| H | 5.266600  | -3.939226 | 1.869011  |
| C | 4.644720  | -5.867962 | -0.622937 |
| H | 4.365358  | -6.723854 | -1.190902 |
| O | 5.400837  | -0.252856 | 0.397609  |
| C | 5.950972  | 0.937907  | 1.036912  |
| C | 6.196058  | 1.965417  | -0.029863 |
| H | 6.869314  | 0.655234  | 1.553466  |
| H | 5.235614  | 1.284052  | 1.784567  |
| C | 5.184241  | 2.854177  | -0.405433 |
| C | 7.432607  | 2.034832  | -0.678112 |
| C | 5.403140  | 3.794635  | -1.409010 |
| H | 4.219648  | 2.808815  | 0.091540  |
| C | 7.655533  | 2.974470  | -1.681934 |
| H | 8.225606  | 1.349160  | -0.394214 |

|   |           |          |           |
|---|-----------|----------|-----------|
| H | 4.610303  | 4.480265 | -1.689907 |
| C | 6.640264  | 3.856357 | -2.048997 |
| H | 8.620992  | 3.020172 | -2.175278 |
| H | 6.813219  | 4.590661 | -2.829121 |
| H | -2.083611 | 0.004441 | 0.688432  |

85 atoms

addition of another 7-isomer unit to the 3-isomer chain end,  
structure TS12, in toluene

|   |           |           |           |
|---|-----------|-----------|-----------|
| O | -2.444093 | 0.071911  | -2.303849 |
| O | -4.005234 | -0.850152 | -1.027727 |
| C | -2.744682 | -0.920525 | -1.617278 |
| C | -2.284325 | -2.310940 | -2.057845 |
| H | -2.002349 | -2.918949 | -1.198195 |
| H | -1.382218 | -2.148328 | -2.649669 |
| C | -3.345127 | -3.055642 | -2.892066 |
| H | -3.847995 | -2.355352 | -3.568768 |
| H | -2.835983 | -3.784317 | -3.532185 |
| C | -4.372281 | -3.808467 | -2.034030 |
| H | -3.833737 | -4.529828 | -1.405519 |
| H | -5.021540 | -4.404116 | -2.686070 |
| C | -5.257424 | -2.932955 | -1.137112 |
| H | -5.949368 | -2.344169 | -1.751934 |
| H | -5.872737 | -3.583619 | -0.506521 |
| C | -4.497974 | -1.948319 | -0.244075 |
| H | -3.660298 | -2.426423 | 0.268037  |
| C | -5.405735 | -1.293353 | 0.815394  |
| H | -4.827262 | -0.503538 | 1.302384  |
| C | -5.912515 | -2.223547 | 1.819573  |
| H | -6.242123 | -0.799626 | 0.306749  |
| C | -6.317069 | -2.991881 | 2.652232  |
| H | -6.676122 | -3.672730 | 3.387479  |
| N | -3.360970 | 3.724305  | 0.924392  |
| C | -3.030867 | 2.541281  | 0.342820  |
| N | -3.048732 | 2.421410  | -0.989838 |
| C | -3.367972 | 3.527220  | -1.879785 |
| C | -4.392225 | 4.434832  | -1.211769 |
| C | -3.864156 | 4.865102  | 0.150388  |
| C | -2.291246 | 2.927653  | 3.010881  |
| C | -2.689666 | 1.534994  | 2.540221  |
| N | -2.686019 | 1.488299  | 1.085585  |
| C | -3.216891 | 3.951796  | 2.367411  |
| H | -3.756373 | 3.100229  | -2.805353 |
| H | -2.463784 | 4.094844  | -2.136130 |
| H | -5.335847 | 3.893998  | -1.094459 |
| H | -4.588026 | 5.318697  | -1.823196 |

|   |           |           |           |
|---|-----------|-----------|-----------|
| H | -3.061881 | 5.605517  | 0.035931  |
| H | -4.657774 | 5.338760  | 0.736153  |
| H | -2.823901 | 4.963637  | 2.505879  |
| H | -4.208349 | 3.923486  | 2.837161  |
| H | -1.254115 | 3.126754  | 2.724977  |
| H | -2.358152 | 3.007837  | 4.098384  |
| H | -3.679838 | 1.273051  | 2.936837  |
| H | -1.991408 | 0.775604  | 2.894803  |
| H | -2.844813 | 1.500762  | -1.425788 |
| O | 4.858133  | -1.092526 | 2.506041  |
| C | 4.844806  | -1.220758 | 1.303296  |
| O | -1.758257 | -0.750949 | 0.036454  |
| C | -0.388251 | -0.542755 | -0.147911 |
| H | -0.067759 | 0.384505  | 0.367887  |
| H | -0.163295 | -0.371733 | -1.214843 |
| C | 0.469343  | -1.699637 | 0.383195  |
| H | 0.228800  | -1.850243 | 1.443231  |
| H | 0.177222  | -2.623393 | -0.130132 |
| C | 1.974971  | -1.471324 | 0.216052  |
| H | 2.251494  | -0.525182 | 0.699787  |
| H | 2.210932  | -1.344771 | -0.848349 |
| C | 2.819857  | -2.613257 | 0.791550  |
| H | 2.629755  | -2.709355 | 1.866626  |
| H | 2.513392  | -3.559102 | 0.333883  |
| C | 4.337559  | -2.455067 | 0.574609  |
| H | 4.541493  | -2.328388 | -0.491052 |
| C | 5.131268  | -3.683211 | 1.095017  |
| H | 6.205890  | -3.483525 | 1.015922  |
| C | 4.829492  | -4.915211 | 0.372296  |
| H | 4.922643  | -3.813384 | 2.161595  |
| C | 4.587406  | -5.924652 | -0.234932 |
| H | 4.374214  | -6.821855 | -0.766654 |
| O | 5.282158  | -0.276438 | 0.449193  |
| C | 5.765343  | 0.959274  | 1.053491  |
| C | 6.257912  | 1.853526  | -0.047756 |
| H | 6.555121  | 0.711816  | 1.763762  |
| H | 4.940268  | 1.408373  | 1.609830  |
| C | 5.353944  | 2.590878  | -0.819727 |
| C | 7.623009  | 1.949239  | -0.329401 |
| C | 5.806002  | 3.407460  | -1.852413 |
| H | 4.290403  | 2.521502  | -0.611353 |
| C | 8.079606  | 2.768496  | -1.360366 |
| H | 8.333719  | 1.379599  | 0.262192  |
| H | 5.094709  | 3.974341  | -2.444300 |
| C | 7.171239  | 3.498618  | -2.123898 |
| H | 9.142863  | 2.836075  | -1.566592 |
| H | 7.524681  | 4.137378  | -2.926881 |

|   |           |          |          |
|---|-----------|----------|----------|
| H | -2.362272 | 0.579100 | 0.614208 |
|---|-----------|----------|----------|

85 atoms

addition of another 7-isomer unit to the 3-isomer chain end,  
structure I2, in toluene

|   |           |           |           |
|---|-----------|-----------|-----------|
| O | -2.275743 | 0.716318  | -2.034053 |
| O | -3.736313 | -0.796988 | -1.256966 |
| C | -2.421112 | -0.607991 | -1.733102 |
| C | -2.086603 | -1.440019 | -2.982674 |
| H | -1.747167 | -2.435097 | -2.678551 |
| H | -1.237555 | -0.949945 | -3.462890 |
| C | -3.248662 | -1.571214 | -3.979772 |
| H | -3.769066 | -0.611870 | -4.062462 |
| H | -2.829780 | -1.779633 | -4.970032 |
| C | -4.236838 | -2.696947 | -3.635546 |
| H | -3.676101 | -3.637586 | -3.553356 |
| H | -4.928314 | -2.834327 | -4.474447 |
| C | -5.062553 | -2.492220 | -2.359175 |
| H | -5.785840 | -1.681688 | -2.508114 |
| H | -5.641110 | -3.399911 | -2.157591 |
| C | -4.237563 | -2.135064 | -1.121939 |
| H | -3.405124 | -2.832412 | -0.987613 |
| C | -5.073406 | -2.128247 | 0.173228  |
| H | -4.441602 | -1.740625 | 0.977528  |
| C | -5.595669 | -3.438685 | 0.548059  |
| H | -5.896971 | -1.414962 | 0.054301  |
| C | -6.010712 | -4.523740 | 0.860166  |
| H | -6.383370 | -5.482064 | 1.135688  |
| N | -3.462667 | 2.930912  | 2.268642  |
| C | -2.988259 | 2.087011  | 1.289737  |
| N | -2.929380 | 2.375887  | 0.022298  |
| C | -3.343843 | 3.704586  | -0.400116 |
| C | -4.499653 | 4.233958  | 0.445975  |
| C | -4.094022 | 4.203530  | 1.914141  |
| C | -2.614135 | 1.413456  | 4.043210  |
| C | -2.806925 | 0.313185  | 3.008272  |
| N | -2.504484 | 0.865933  | 1.700520  |
| C | -3.515158 | 2.590468  | 3.691071  |
| H | -3.633869 | 3.652793  | -1.453596 |
| H | -2.498179 | 4.408514  | -0.348064 |
| H | -5.377723 | 3.598517  | 0.290667  |
| H | -4.774639 | 5.253488  | 0.159963  |
| H | -3.406344 | 5.029916  | 2.140891  |
| H | -4.972013 | 4.336763  | 2.556324  |
| H | -3.221595 | 3.477040  | 4.264567  |
| H | -4.554538 | 2.363880  | 3.971782  |

|   |           |           |           |
|---|-----------|-----------|-----------|
| H | -1.565711 | 1.725395  | 4.041277  |
| H | -2.856942 | 1.057181  | 5.047715  |
| H | -3.833310 | -0.082388 | 3.067916  |
| H | -2.127256 | -0.522033 | 3.190071  |
| H | -2.542959 | 1.284421  | -1.243913 |
| O | 4.683941  | 1.167898  | 2.138637  |
| C | 4.730411  | 0.220893  | 1.387713  |
| O | -1.590696 | -0.989716 | -0.605143 |
| C | -0.179231 | -0.822517 | -0.778032 |
| H | 0.026689  | 0.193946  | -1.128306 |
| H | 0.191735  | -1.523796 | -1.536023 |
| C | 0.507061  | -1.087167 | 0.554472  |
| H | 0.129808  | -0.373278 | 1.294570  |
| H | 0.225632  | -2.086864 | 0.905151  |
| C | 2.032411  | -0.976941 | 0.457502  |
| H | 2.298498  | 0.016386  | 0.077239  |
| H | 2.409196  | -1.694169 | -0.282078 |
| C | 2.723168  | -1.227320 | 1.802350  |
| H | 2.380026  | -0.492768 | 2.539823  |
| H | 2.431567  | -2.211858 | 2.181333  |
| C | 4.264001  | -1.182367 | 1.744622  |
| H | 4.615631  | -1.866403 | 0.968769  |
| C | 4.905452  | -1.580813 | 3.099001  |
| H | 5.990542  | -1.440156 | 3.043062  |
| C | 4.630131  | -2.961354 | 3.485693  |
| H | 4.550874  | -0.895131 | 3.874684  |
| C | 4.410919  | -4.103156 | 3.793273  |
| H | 4.220234  | -5.112229 | 4.073744  |
| O | 5.191690  | 0.290646  | 0.125971  |
| C | 5.632878  | 1.607703  | -0.323948 |
| C | 6.111536  | 1.476568  | -1.740713 |
| H | 6.422459  | 1.948661  | 0.347420  |
| H | 4.792720  | 2.298026  | -0.236350 |
| C | 5.240852  | 1.707582  | -2.809487 |
| C | 7.431184  | 1.101465  | -2.011237 |
| C | 5.679423  | 1.567835  | -4.124385 |
| H | 4.214067  | 2.000496  | -2.611090 |
| C | 7.872843  | 0.959726  | -3.324208 |
| H | 8.116271  | 0.920543  | -1.188037 |
| H | 4.994415  | 1.753522  | -4.945218 |
| C | 6.996728  | 1.193224  | -4.383630 |
| H | 8.900226  | 0.671098  | -3.521169 |
| H | 7.340599  | 1.086663  | -5.407384 |
| H | -2.294534 | 0.222295  | 0.944600  |

85 atoms

addition of another 7-isomer unit to the 3-isomer chain end,  
structure TS23, in toluene

|   |           |           |           |
|---|-----------|-----------|-----------|
| O | -2.104692 | -0.996515 | -1.947481 |
| O | -3.789536 | -1.206418 | -0.464499 |
| C | -2.468089 | -1.630628 | -0.792284 |
| C | -2.344886 | -3.146308 | -1.021382 |
| H | -2.233181 | -3.651621 | -0.057195 |
| H | -1.407902 | -3.294194 | -1.562149 |
| C | -3.507520 | -3.766658 | -1.811919 |
| H | -3.801924 | -3.087085 | -2.617810 |
| H | -3.148445 | -4.680494 | -2.297313 |
| C | -4.719612 | -4.135237 | -0.943188 |
| H | -4.386189 | -4.825891 | -0.157218 |
| H | -5.438096 | -4.697758 | -1.549952 |
| C | -5.454338 | -2.956825 | -0.292002 |
| H | -5.976920 | -2.369952 | -1.056572 |
| H | -6.219806 | -3.346395 | 0.387076  |
| C | -4.546811 | -1.991088 | 0.472516  |
| H | -3.866325 | -2.532120 | 1.136391  |
| C | -5.332923 | -0.978315 | 1.327774  |
| H | -4.612423 | -0.283467 | 1.769428  |
| C | -6.123134 | -1.589003 | 2.392315  |
| H | -5.981647 | -0.388904 | 0.669570  |
| C | -6.761449 | -2.093495 | 3.278113  |
| H | -7.329078 | -2.538965 | 4.060773  |
| N | -2.730622 | 3.908427  | -1.255217 |
| C | -2.685940 | 2.541630  | -1.105951 |
| N | -2.106205 | 1.719508  | -1.931173 |
| C | -1.398518 | 2.276581  | -3.073505 |
| C | -2.084682 | 3.531659  | -3.608478 |
| C | -2.225720 | 4.540933  | -2.475854 |
| C | -3.644403 | 4.167180  | 1.038736  |
| C | -4.210343 | 2.768776  | 0.831594  |
| N | -3.264962 | 2.016180  | 0.026599  |
| C | -3.398840 | 4.813155  | -0.318760 |
| H | -1.344630 | 1.508669  | -3.850673 |
| H | -0.357480 | 2.515140  | -2.804325 |
| H | -3.074871 | 3.263885  | -3.991741 |
| H | -1.521048 | 3.978376  | -4.432820 |
| H | -1.260891 | 5.023019  | -2.267031 |
| H | -2.923676 | 5.337095  | -2.757928 |
| H | -2.775715 | 5.707329  | -0.205540 |
| H | -4.352759 | 5.146512  | -0.753895 |
| H | -2.707140 | 4.092369  | 1.597512  |
| H | -4.332668 | 4.787801  | 1.618286  |
| H | -5.204844 | 2.828942  | 0.361976  |
| H | -4.332952 | 2.254331  | 1.786860  |

|   |           |           |           |
|---|-----------|-----------|-----------|
| H | -2.175386 | 0.004521  | -1.859858 |
| O | 4.614010  | 2.044448  | 1.293371  |
| C | 4.609283  | 0.845663  | 1.454236  |
| O | -1.701325 | -1.200128 | 0.339134  |
| C | -0.281420 | -1.298677 | 0.233063  |
| H | 0.045906  | -0.871552 | -0.719954 |
| H | 0.032643  | -2.351476 | 0.258209  |
| C | 0.326384  | -0.538862 | 1.402951  |
| H | -0.028845 | 0.496416  | 1.362587  |
| H | -0.056492 | -0.964659 | 2.337625  |
| C | 1.857786  | -0.573513 | 1.400977  |
| H | 2.227107  | -0.163321 | 0.453424  |
| H | 2.205039  | -1.613697 | 1.435001  |
| C | 2.460971  | 0.199119  | 2.579011  |
| H | 2.151917  | 1.249587  | 2.532755  |
| H | 2.063741  | -0.202739 | 3.516356  |
| C | 4.000503  | 0.142303  | 2.657463  |
| H | 4.323831  | -0.901133 | 2.642332  |
| C | 4.539762  | 0.820447  | 3.943627  |
| H | 5.634535  | 0.847182  | 3.909557  |
| C | 4.124172  | 0.146838  | 5.170330  |
| H | 4.211533  | 1.864329  | 3.958253  |
| C | 3.788589  | -0.418959 | 6.177116  |
| H | 3.493690  | -0.912951 | 7.072793  |
| O | 5.135672  | -0.026684 | 0.575368  |
| C | 5.717526  | 0.552689  | -0.631455 |
| C | 6.258952  | -0.568936 | -1.469555 |
| H | 6.496896  | 1.254121  | -0.329833 |
| H | 4.939451  | 1.114461  | -1.150334 |
| C | 5.467226  | -1.167072 | -2.454075 |
| C | 7.557309  | -1.045154 | -1.263139 |
| C | 5.962611  | -2.220523 | -3.219300 |
| H | 4.457454  | -0.804909 | -2.623417 |
| C | 8.055667  | -2.098587 | -2.025465 |
| H | 8.181148  | -0.587028 | -0.501193 |
| H | 5.338838  | -2.674195 | -3.982571 |
| C | 7.258267  | -2.688107 | -3.005713 |
| H | 9.066043  | -2.457153 | -1.857618 |
| H | 7.646504  | -3.506909 | -3.602796 |
| H | -3.343694 | 1.006966  | 0.010678  |

85 atoms

addition of another 7-isomer unit to the 3-isomer chain end,  
structure I3, in toluene

|   |           |           |           |
|---|-----------|-----------|-----------|
| O | 0.615994  | -0.016552 | 0.229987  |
| O | -0.121155 | 2.076064  | -0.147288 |



|   |           |           |           |
|---|-----------|-----------|-----------|
| C | -0.483281 | 0.787794  | 0.348123  |
| C | -1.642545 | 0.156762  | -0.447951 |
| H | -2.595196 | 0.462836  | -0.004552 |
| H | -1.562968 | -0.922948 | -0.305754 |
| C | -1.641868 | 0.491262  | -1.948369 |
| H | -0.617708 | 0.450667  | -2.332290 |
| H | -2.197355 | -0.292321 | -2.474857 |
| C | -2.297574 | 1.841046  | -2.287733 |
| H | -3.316049 | 1.842070  | -1.877417 |
| H | -2.414336 | 1.917284  | -3.374621 |
| C | -1.560014 | 3.093498  | -1.793381 |
| H | -0.637944 | 3.236996  | -2.369866 |
| H | -2.185870 | 3.973623  | -1.975162 |
| C | -1.170293 | 3.044650  | -0.316459 |
| H | -2.023220 | 2.763577  | 0.306174  |
| C | -0.615747 | 4.378074  | 0.220949  |
| H | -0.229796 | 4.193964  | 1.227601  |
| C | -1.603875 | 5.451800  | 0.255538  |
| H | 0.239837  | 4.684728  | -0.392299 |
| C | -2.427602 | 6.327622  | 0.290587  |
| H | -3.153121 | 7.105863  | 0.323975  |
| N | 4.851065  | 2.178403  | 1.208620  |
| C | 3.525258  | 1.909536  | 0.956244  |
| N | 2.863201  | 0.898668  | 1.443128  |
| C | 3.547875  | 0.023934  | 2.381627  |
| C | 5.021330  | -0.150461 | 2.017686  |
| C | 5.680511  | 1.221556  | 1.944410  |
| C | 4.642476  | 4.404526  | 0.122367  |
| C | 3.531666  | 3.754757  | -0.693477 |
| N | 2.850502  | 2.798198  | 0.157362  |
| C | 5.575143  | 3.320097  | 0.648136  |
| H | 3.037455  | -0.943567 | 2.383423  |
| H | 3.467519  | 0.416071  | 3.407670  |
| H | 5.092991  | -0.649276 | 1.045529  |
| H | 5.547105  | -0.772621 | 2.748008  |
| H | 5.875536  | 1.608860  | 2.953761  |
| H | 6.650487  | 1.153053  | 1.438649  |
| H | 6.227453  | 3.727560  | 1.428901  |
| H | 6.233607  | 2.968832  | -0.160223 |
| H | 4.195731  | 4.955871  | 0.954694  |
| H | 5.214365  | 5.113250  | -0.482377 |
| H | 3.950490  | 3.284765  | -1.597047 |
| H | 2.803876  | 4.498644  | -1.024845 |
| H | 1.408879  | 0.378448  | 0.715491  |
| O | 0.195656  | -2.688181 | 7.714457  |
| C | -0.940487 | -2.695267 | 7.299766  |
| O | -0.838829 | 1.035348  | 1.709348  |

|   |           |           |           |
|---|-----------|-----------|-----------|
| C | -1.171831 | -0.104837 | 2.499670  |
| H | -0.449791 | -0.906479 | 2.312921  |
| H | -2.169385 | -0.479234 | 2.230178  |
| C | -1.143320 | 0.313317  | 3.962628  |
| H | -0.141219 | 0.689993  | 4.194036  |
| H | -1.832455 | 1.153940  | 4.103017  |
| C | -1.512948 | -0.830909 | 4.911714  |
| H | -0.840613 | -1.679127 | 4.734089  |
| H | -2.522435 | -1.192590 | 4.679830  |
| C | -1.449919 | -0.413899 | 6.385063  |
| H | -0.430606 | -0.102111 | 6.639583  |
| H | -2.092506 | 0.457778  | 6.543371  |
| C | -1.891325 | -1.510566 | 7.375597  |
| H | -2.891186 | -1.858614 | 7.106038  |
| C | -1.912700 | -0.995731 | 8.838357  |
| H | -2.134063 | -1.829146 | 9.514346  |
| C | -2.890251 | 0.064615  | 9.064723  |
| H | -0.910563 | -0.646484 | 9.105416  |
| C | -3.705890 | 0.928808  | 9.249672  |
| H | -4.423143 | 1.696783  | 9.419919  |
| O | -1.510086 | -3.758522 | 6.703115  |
| C | -0.665640 | -4.939874 | 6.556539  |
| C | -1.479681 | -6.011560 | 5.891192  |
| H | -0.324491 | -5.239079 | 7.548767  |
| H | 0.209833  | -4.663503 | 5.967161  |
| C | -1.463342 | -6.157563 | 4.501148  |
| C | -2.282614 | -6.866694 | 6.652291  |
| C | -2.233422 | -7.139680 | 3.882086  |
| H | -0.842826 | -5.499382 | 3.900101  |
| C | -3.054499 | -7.848919 | 6.036999  |
| H | -2.302024 | -6.762466 | 7.733230  |
| H | -2.209305 | -7.244725 | 2.802319  |
| C | -3.030720 | -7.987036 | 4.649654  |
| H | -3.671250 | -8.508266 | 6.639056  |
| H | -3.629178 | -8.754232 | 4.169105  |
| H | 1.894511  | 2.535731  | -0.053535 |

85 atoms

addition of another 7-isomer unit to the 3-isomer chain end,  
structure TSr, in toluene

|   |           |          |           |
|---|-----------|----------|-----------|
| O | -0.421074 | 0.150743 | -0.087140 |
| O | -0.293477 | 2.398532 | -0.034671 |
| C | -1.151412 | 1.268442 | 0.189144  |
| C | -2.392317 | 1.292094 | -0.718885 |
| H | -3.181785 | 1.860975 | -0.220724 |
| H | -2.740417 | 0.257299 | -0.767776 |

|   |           |           |           |
|---|-----------|-----------|-----------|
| C | -2.152224 | 1.848989  | -2.130041 |
| H | -1.190817 | 1.488030  | -2.509614 |
| H | -2.917348 | 1.441458  | -2.799688 |
| C | -2.227444 | 3.383787  | -2.208050 |
| H | -3.203225 | 3.700175  | -1.816607 |
| H | -2.214726 | 3.690412  | -3.260080 |
| C | -1.122507 | 4.152963  | -1.469458 |
| H | -0.168089 | 4.035831  | -1.997415 |
| H | -1.361013 | 5.221849  | -1.482693 |
| C | -0.899632 | 3.701665  | -0.025440 |
| H | -1.844188 | 3.657701  | 0.522357  |
| C | 0.055185  | 4.618932  | 0.763728  |
| H | 0.270907  | 4.130479  | 1.718380  |
| C | -0.479838 | 5.956206  | 1.000310  |
| H | 1.008134  | 4.694587  | 0.226770  |
| C | -0.933820 | 7.051965  | 1.200009  |
| H | -1.332457 | 8.022505  | 1.379726  |
| N | 4.337012  | 0.417931  | 0.988231  |
| C | 3.009613  | 0.722652  | 0.799829  |
| N | 2.014408  | -0.073426 | 1.078005  |
| C | 2.318436  | -1.356876 | 1.690902  |
| C | 3.626063  | -1.941245 | 1.160361  |
| C | 4.745684  | -0.932031 | 1.382808  |
| C | 4.977116  | 2.773751  | 0.521450  |
| C | 3.713884  | 2.807714  | -0.329408 |
| N | 2.717514  | 1.970819  | 0.312222  |
| C | 5.438329  | 1.329335  | 0.672299  |
| H | 1.485777  | -2.037257 | 1.489728  |
| H | 2.380392  | -1.259502 | 2.786637  |
| H | 3.518461  | -2.147142 | 0.090396  |
| H | 3.877109  | -2.884220 | 1.654977  |
| H | 5.055526  | -0.926572 | 2.436708  |
| H | 5.628920  | -1.204683 | 0.794213  |
| H | 6.185338  | 1.251417  | 1.470286  |
| H | 5.929484  | 0.994116  | -0.253026 |
| H | 4.756798  | 3.205496  | 1.501943  |
| H | 5.776157  | 3.364420  | 0.065976  |
| H | 3.938199  | 2.476010  | -1.355098 |
| H | 3.316833  | 3.822792  | -0.397825 |
| H | 0.474874  | 0.149017  | 0.378604  |
| O | -0.604106 | -1.259482 | 8.098573  |
| C | -1.376542 | -1.898133 | 7.421739  |
| O | -1.586052 | 1.366035  | 1.551702  |
| C | -1.456515 | 0.221058  | 2.393483  |
| H | -0.399317 | -0.020522 | 2.548628  |
| H | -1.933026 | -0.650733 | 1.929911  |
| C | -2.124299 | 0.552461  | 3.720493  |

|   |           |           |          |
|---|-----------|-----------|----------|
| H | -1.634375 | 1.433318  | 4.150616 |
| H | -3.165172 | 0.837053  | 3.530074 |
| C | -2.073812 | -0.614316 | 4.712217 |
| H | -1.030181 | -0.917726 | 4.860953 |
| H | -2.583990 | -1.485146 | 4.282163 |
| C | -2.712813 | -0.265887 | 6.060845 |
| H | -2.163654 | 0.558215  | 6.530028 |
| H | -3.734230 | 0.091448  | 5.897197 |
| C | -2.780351 | -1.442394 | 7.055337 |
| H | -3.298788 | -2.281879 | 6.586445 |
| C | -3.523970 | -1.055879 | 8.360581 |
| H | -3.461726 | -1.885010 | 9.074179 |
| C | -4.929608 | -0.723752 | 8.148203 |
| H | -3.005248 | -0.213056 | 8.827831 |
| C | -6.089897 | -0.463333 | 7.968757 |
| H | -7.117099 | -0.228424 | 7.817450 |
| O | -1.086099 | -3.101885 | 6.894015 |
| C | 0.255553  | -3.609804 | 7.157488 |
| C | 0.387389  | -4.945591 | 6.484375 |
| H | 0.391692  | -3.680680 | 8.237388 |
| H | 0.973825  | -2.882808 | 6.774149 |
| C | 0.633035  | -5.024507 | 5.109406 |
| C | 0.250601  | -6.128028 | 7.215788 |
| C | 0.738819  | -6.260712 | 4.478468 |
| H | 0.739670  | -4.111496 | 4.530997 |
| C | 0.359742  | -7.367717 | 6.588150 |
| H | 0.058533  | -6.078799 | 8.283602 |
| H | 0.929364  | -6.308756 | 3.411232 |
| C | 0.603203  | -7.435730 | 5.218029 |
| H | 0.254668  | -8.278548 | 7.168575 |
| H | 0.688775  | -8.399966 | 4.727540 |
| H | 1.735952  | 2.122079  | 0.106673 |

85 atoms

addition of another 7-isomer unit to the 3-isomer chain end,  
structure I3r, in toluene

|   |           |          |           |
|---|-----------|----------|-----------|
| O | -0.966169 | 0.401078 | -0.577299 |
| O | -0.293367 | 2.234834 | 0.538449  |
| C | -1.449852 | 1.529239 | 0.030595  |
| C | -2.253928 | 2.347056 | -0.988244 |
| H | -3.005404 | 2.935737 | -0.455289 |
| H | -2.800498 | 1.611796 | -1.582462 |
| C | -1.411848 | 3.255631 | -1.893937 |
| H | -0.504636 | 2.727048 | -2.204941 |
| H | -1.979805 | 3.449353 | -2.810104 |
| C | -1.060474 | 4.612290 | -1.260855 |

|   |           |           |           |
|---|-----------|-----------|-----------|
| H | -1.993438 | 5.100070  | -0.949557 |
| H | -0.624983 | 5.263501  | -2.027176 |
| C | -0.098839 | 4.568245  | -0.065564 |
| H | 0.908998  | 4.299690  | -0.406351 |
| H | -0.025604 | 5.569719  | 0.371226  |
| C | -0.492128 | 3.570835  | 1.025269  |
| H | -1.540139 | 3.696592  | 1.311471  |
| C | 0.367156  | 3.695699  | 2.300118  |
| H | 0.099911  | 2.872843  | 2.969870  |
| C | 0.202892  | 4.966716  | 2.998765  |
| H | 1.421537  | 3.549286  | 2.038354  |
| C | 0.053208  | 6.010866  | 3.576664  |
| H | -0.077166 | 6.933955  | 4.090625  |
| N | 3.483315  | -1.190161 | 0.492839  |
| C | 2.329077  | -0.440578 | 0.504442  |
| N | 1.122261  | -0.927855 | 0.545932  |
| C | 0.970395  | -2.371918 | 0.634428  |
| C | 2.053572  | -3.101497 | -0.157789 |
| C | 3.422661  | -2.646436 | 0.333809  |
| C | 4.860221  | 0.860073  | 0.780938  |
| C | 3.699321  | 1.579200  | 0.105649  |
| N | 2.469316  | 0.927334  | 0.518502  |
| C | 4.826225  | -0.614093 | 0.396193  |
| H | -0.022299 | -2.632324 | 0.256299  |
| H | 0.997388  | -2.700959 | 1.684746  |
| H | 1.942361  | -2.861316 | -1.220227 |
| H | 1.967836  | -4.187057 | -0.053858 |
| H | 3.667016  | -3.128250 | 1.290104  |
| H | 4.201432  | -2.942411 | -0.377947 |
| H | 5.493036  | -1.191579 | 1.046251  |
| H | 5.200614  | -0.740647 | -0.630525 |
| H | 4.765533  | 0.971468  | 1.864993  |
| H | 5.819275  | 1.290807  | 0.481789  |
| H | 3.831377  | 1.568116  | -0.987509 |
| H | 3.653967  | 2.625642  | 0.415318  |
| H | -0.207546 | -0.024461 | -0.071679 |
| O | -1.928142 | -0.570121 | 8.110198  |
| C | -2.008280 | -1.431075 | 7.264639  |
| O | -2.339486 | 1.271132  | 1.101530  |
| C | -1.933518 | 0.273722  | 2.042218  |
| H | -0.911934 | 0.471031  | 2.383872  |
| H | -1.935931 | -0.709400 | 1.559679  |
| C | -2.912281 | 0.300689  | 3.206262  |
| H | -2.913879 | 1.303631  | 3.648320  |
| H | -3.923289 | 0.130734  | 2.819018  |
| C | -2.574396 | -0.742555 | 4.276141  |
| H | -1.563676 | -0.556104 | 4.656906  |

|   |           |           |          |
|---|-----------|-----------|----------|
| H | -2.542815 | -1.740165 | 3.821119 |
| C | -3.580835 | -0.749855 | 5.431485 |
| H | -3.625148 | 0.240971  | 5.898337 |
| H | -4.581011 | -0.953013 | 5.036313 |
| C | -3.286605 | -1.797912 | 6.527258 |
| H | -3.142183 | -2.774227 | 6.058322 |
| C | -4.439489 | -1.895346 | 7.558434 |
| H | -4.144582 | -2.566862 | 8.372222 |
| C | -5.690757 | -2.376430 | 6.980328 |
| H | -4.590254 | -0.913529 | 8.017407 |
| C | -6.714833 | -2.784133 | 6.499261 |
| H | -7.625984 | -3.141535 | 6.080581 |
| O | -0.959567 | -2.166321 | 6.849394 |
| C | 0.326553  | -1.846571 | 7.459891 |
| C | 1.379806  | -2.679553 | 6.788342 |
| H | 0.257054  | -2.055421 | 8.528764 |
| H | 0.508326  | -0.778237 | 7.336016 |
| C | 2.033495  | -2.207414 | 5.646189 |
| C | 1.710017  | -3.944820 | 7.282466 |
| C | 2.999848  | -2.983368 | 5.010470 |
| H | 1.785618  | -1.226118 | 5.252769 |
| C | 2.675844  | -4.723845 | 6.649406 |
| H | 1.208618  | -4.321451 | 8.169194 |
| H | 3.501585  | -2.601239 | 4.127377 |
| C | 3.323096  | -4.243643 | 5.511907 |
| H | 2.925392  | -5.702955 | 7.045140 |
| H | 4.078490  | -4.848187 | 5.020264 |
| H | 1.591645  | 1.425419  | 0.415876 |

85 atoms

addition of another 7-isomer unit to the 3-isomer chain end,  
structure TS34, in toluene

|   |           |           |           |
|---|-----------|-----------|-----------|
| O | -2.235598 | -0.609019 | -2.014351 |
| O | -2.631057 | -1.342368 | 0.318410  |
| C | -2.220523 | -1.745717 | -1.495459 |
| C | -3.285654 | -2.787621 | -1.833547 |
| H | -2.982082 | -3.759856 | -1.438668 |
| H | -3.234164 | -2.875655 | -2.925340 |
| C | -4.726295 | -2.461375 | -1.406611 |
| H | -4.865515 | -1.376578 | -1.377155 |
| H | -5.407137 | -2.833081 | -2.181319 |
| C | -5.159759 | -3.100565 | -0.074846 |
| H | -4.938919 | -4.175194 | -0.126494 |
| H | -6.251742 | -3.029406 | 0.007078  |
| C | -4.542824 | -2.529162 | 1.209542  |
| H | -4.960139 | -1.532672 | 1.408033  |

|   |           |           |           |
|---|-----------|-----------|-----------|
| H | -4.842143 | -3.167760 | 2.049598  |
| C | -3.012221 | -2.377838 | 1.166717  |
| H | -2.568785 | -3.328667 | 0.825745  |
| C | -2.422333 | -2.119094 | 2.585384  |
| H | -1.360417 | -1.888320 | 2.453614  |
| C | -2.570132 | -3.226350 | 3.524969  |
| H | -2.888553 | -1.219188 | 3.005389  |
| C | -2.692796 | -4.156825 | 4.279474  |
| H | -2.797636 | -4.978242 | 4.948038  |
| N | -4.508146 | 3.159024  | -0.049873 |
| C | -3.953072 | 1.944151  | -0.283223 |
| N | -3.932048 | 1.432637  | -1.520769 |
| C | -4.382083 | 2.177427  | -2.687608 |
| C | -5.549262 | 3.071525  | -2.294329 |
| C | -5.138969 | 3.946781  | -1.116972 |
| C | -3.380503 | 3.197747  | 2.145549  |
| C | -3.428261 | 1.677200  | 2.095662  |
| N | -3.422472 | 1.227019  | 0.710760  |
| C | -4.502476 | 3.765189  | 1.286644  |
| H | -4.674107 | 1.454452  | -3.450776 |
| H | -3.562877 | 2.777966  | -3.104459 |
| H | -6.407388 | 2.451980  | -2.017627 |
| H | -5.851778 | 3.703888  | -3.131962 |
| H | -4.448281 | 4.734992  | -1.442372 |
| H | -6.014374 | 4.441378  | -0.687103 |
| H | -4.376329 | 4.843561  | 1.158077  |
| H | -5.477166 | 3.606685  | 1.765230  |
| H | -2.413782 | 3.547618  | 1.771281  |
| H | -3.487769 | 3.552610  | 3.172971  |
| H | -4.319935 | 1.308478  | 2.619532  |
| H | -2.558418 | 1.241325  | 2.589892  |
| H | -3.342243 | 0.590257  | -1.684412 |
| O | 5.236950  | -1.204594 | 1.874029  |
| C | 5.201806  | -0.839346 | 0.721698  |
| O | -1.015087 | -2.396991 | -1.323447 |
| C | 0.127292  | -1.550163 | -1.180451 |
| H | -0.041550 | -0.869025 | -0.340432 |
| H | 0.249941  | -0.943885 | -2.083171 |
| C | 1.338277  | -2.438180 | -0.941364 |
| H | 1.170670  | -3.033536 | -0.036738 |
| H | 1.423142  | -3.150378 | -1.770359 |
| C | 2.637282  | -1.637042 | -0.807102 |
| H | 2.530035  | -0.909702 | 0.007259  |
| H | 2.802893  | -1.048343 | -1.718029 |
| C | 3.855123  | -2.531657 | -0.552402 |
| H | 3.717108  | -3.091106 | 0.379700  |
| H | 3.934093  | -3.272937 | -1.353709 |

|   |           |           |           |
|---|-----------|-----------|-----------|
| C | 5.196085  | -1.774317 | -0.477539 |
| H | 5.322600  | -1.171904 | -1.380068 |
| C | 6.401487  | -2.741814 | -0.344145 |
| H | 7.318888  | -2.162158 | -0.192315 |
| C | 6.579289  | -3.606473 | -1.506819 |
| H | 6.271428  | -3.347246 | 0.558225  |
| C | 6.727692  | -4.306904 | -2.473066 |
| H | 6.862234  | -4.933247 | -3.323234 |
| O | 5.156970  | 0.454443  | 0.351571  |
| C | 5.126106  | 1.428265  | 1.436866  |
| C | 5.111983  | 2.801171  | 0.829035  |
| H | 6.001474  | 1.268821  | 2.067654  |
| H | 4.236518  | 1.236199  | 2.039391  |
| C | 3.913411  | 3.366366  | 0.381664  |
| C | 6.297326  | 3.527045  | 0.684870  |
| C | 3.900063  | 4.631989  | -0.198201 |
| H | 2.986681  | 2.810171  | 0.487853  |
| C | 6.287500  | 4.795123  | 0.107282  |
| H | 7.233877  | 3.097414  | 1.028171  |
| H | 2.963495  | 5.059972  | -0.540847 |
| C | 5.088153  | 5.349482  | -0.335603 |
| H | 7.214595  | 5.349635  | 0.004399  |
| H | 5.078372  | 6.337457  | -0.784547 |
| H | -3.108925 | 0.236745  | 0.520036  |

85 atoms

addition of another 7-isomer unit to the 3-isomer chain end,  
structure I4, in toluene

|   |           |           |           |
|---|-----------|-----------|-----------|
| O | -1.427955 | -0.537717 | -0.602485 |
| O | -4.131090 | -1.664444 | 2.188359  |
| C | -1.264702 | -1.732943 | -0.454064 |
| C | -2.358950 | -2.714623 | -0.126594 |
| H | -2.615683 | -2.533304 | 0.922428  |
| H | -1.976960 | -3.733447 | -0.217111 |
| C | -3.616242 | -2.508594 | -0.986122 |
| H | -3.868933 | -1.445530 | -1.011852 |
| H | -3.379021 | -2.788526 | -2.019184 |
| C | -4.843693 | -3.314168 | -0.523700 |
| H | -4.535225 | -4.325461 | -0.227441 |
| H | -5.494887 | -3.453006 | -1.394106 |
| C | -5.713635 | -2.699772 | 0.588869  |
| H | -6.004060 | -1.679164 | 0.310147  |
| H | -6.641552 | -3.280877 | 0.631209  |
| C | -5.121736 | -2.661213 | 2.006598  |
| H | -4.619354 | -3.614439 | 2.208053  |
| C | -6.225245 | -2.490540 | 3.087277  |



|   |           |           |           |
|---|-----------|-----------|-----------|
| H | -5.717144 | -2.320079 | 4.041484  |
| C | -7.129594 | -3.629327 | 3.209833  |
| H | -6.801224 | -1.582733 | 2.872813  |
| C | -7.855303 | -4.585088 | 3.301526  |
| H | -8.501750 | -5.426240 | 3.388307  |
| N | -5.210289 | 3.031905  | 0.512048  |
| C | -4.673339 | 1.773885  | 0.681980  |
| N | -3.738621 | 1.371946  | -0.245508 |
| C | -3.069750 | 2.311166  | -1.129633 |
| C | -4.120936 | 3.245626  | -1.709422 |
| C | -4.837487 | 3.950541  | -0.565396 |
| C | -6.017768 | 2.851386  | 2.832183  |
| C | -6.048952 | 1.350216  | 2.558726  |
| N | -5.012893 | 0.938520  | 1.622154  |
| C | -6.124280 | 3.593561  | 1.507564  |
| H | -2.568076 | 1.735563  | -1.908193 |
| H | -2.295498 | 2.893061  | -0.605280 |
| H | -4.832670 | 2.661911  | -2.300733 |
| H | -3.667230 | 3.989905  | -2.369137 |
| H | -4.198644 | 4.747988  | -0.157406 |
| H | -5.750760 | 4.435479  | -0.928832 |
| H | -5.871478 | 4.651600  | 1.639303  |
| H | -7.154493 | 3.558033  | 1.126780  |
| H | -5.074999 | 3.108788  | 3.326334  |
| H | -6.832756 | 3.155459  | 3.495559  |
| H | -7.046588 | 1.072165  | 2.182089  |
| H | -5.907931 | 0.793491  | 3.490025  |
| H | -3.203876 | 0.551154  | 0.005854  |
| O | 6.787121  | -0.887836 | 0.896062  |
| C | 6.441531  | -0.580155 | -0.221113 |
| O | -0.056010 | -2.315349 | -0.534721 |
| C | 1.076516  | -1.444237 | -0.773439 |
| H | 1.107015  | -0.686137 | 0.012883  |
| H | 0.929176  | -0.930555 | -1.726794 |
| C | 2.325246  | -2.307043 | -0.780629 |
| H | 2.398737  | -2.833117 | 0.177237  |
| H | 2.222060  | -3.076040 | -1.553920 |
| C | 3.594408  | -1.483547 | -1.025944 |
| H | 3.676454  | -0.706900 | -0.256204 |
| H | 3.512079  | -0.953995 | -1.982985 |
| C | 4.857875  | -2.350787 | -1.033448 |
| H | 4.969208  | -2.855354 | -0.067205 |
| H | 4.753424  | -3.136673 | -1.787809 |
| C | 6.154984  | -1.574662 | -1.336232 |
| H | 6.034096  | -1.017163 | -2.267890 |
| C | 7.376882  | -2.520776 | -1.469991 |
| H | 8.288226  | -1.923277 | -1.583238 |

|   |           |           |           |
|---|-----------|-----------|-----------|
| C | 7.274150  | -3.440350 | -2.599115 |
| H | 7.495188  | -3.081410 | -0.537639 |
| C | 7.189145  | -4.186744 | -3.538243 |
| H | 7.121625  | -4.853230 | -4.365614 |
| O | 6.256251  | 0.690802  | -0.622151 |
| C | 6.492435  | 1.721802  | 0.384185  |
| C | 6.298238  | 3.059737  | -0.268576 |
| H | 7.505426  | 1.594231  | 0.768678  |
| H | 5.795737  | 1.562264  | 1.208452  |
| C | 5.076268  | 3.730250  | -0.169455 |
| C | 7.335044  | 3.646377  | -1.001527 |
| C | 4.892157  | 4.964875  | -0.788797 |
| H | 4.264563  | 3.284551  | 0.397908  |
| C | 7.154032  | 4.878566  | -1.623640 |
| H | 8.289369  | 3.134397  | -1.083896 |
| H | 3.939596  | 5.477118  | -0.700695 |
| C | 5.931072  | 5.540642  | -1.517525 |
| H | 7.967057  | 5.324607  | -2.187178 |
| H | 5.790319  | 6.503197  | -1.998475 |
| H | -4.465490 | -0.765775 | 1.928197  |

85 atoms

addition of another 7-isomer unit to the 3-isomer chain end,  
structure I5, in toluene

|   |           |           |           |
|---|-----------|-----------|-----------|
| O | 0.251488  | -0.997523 | 11.096978 |
| O | -6.789285 | -0.605121 | 9.368230  |
| C | -0.055633 | -0.290558 | 10.166829 |
| C | -1.463289 | 0.124551  | 9.795936  |
| H | -1.612571 | -0.101029 | 8.734458  |
| H | -1.513230 | 1.217717  | 9.867370  |
| C | -2.542843 | -0.530595 | 10.655577 |
| H | -2.459049 | -1.619237 | 10.569817 |
| H | -2.356175 | -0.298816 | 11.709386 |
| C | -3.954879 | -0.089300 | 10.259332 |
| H | -4.124206 | -0.310486 | 9.201657  |
| H | -4.041713 | 1.000528  | 10.364150 |
| C | -5.044304 | -0.766379 | 11.094558 |
| H | -4.963606 | -1.855171 | 10.984006 |
| H | -4.876874 | -0.549353 | 12.157157 |
| C | -6.470347 | -0.335450 | 10.721644 |
| H | -6.554442 | 0.751640  | 10.831465 |
| C | -7.500166 | -0.989472 | 11.676738 |
| H | -7.450455 | -2.078586 | 11.554828 |
| C | -8.871465 | -0.537253 | 11.461893 |
| H | -7.213128 | -0.782861 | 12.714652 |
| C | -9.999143 | -0.149752 | 11.304712 |

|   |            |           |           |
|---|------------|-----------|-----------|
| H | -10.996075 | 0.189739  | 11.151461 |
| N | -5.289415  | -3.388836 | 5.912187  |
| C | -5.609063  | -2.555115 | 6.958524  |
| N | -5.432374  | -1.199885 | 6.753445  |
| C | -5.350476  | -0.633142 | 5.417856  |
| C | -4.377111  | -1.479360 | 4.608780  |
| C | -4.865442  | -2.922523 | 4.590532  |
| C | -6.515089  | -5.150789 | 7.131866  |
| C | -6.118092  | -4.372055 | 8.384612  |
| N | -6.021359  | -2.943498 | 8.130446  |
| C | -5.530632  | -4.830035 | 6.013995  |
| H | -4.996805  | 0.396134  | 5.506222  |
| H | -6.330943  | -0.600633 | 4.917547  |
| H | -3.386609  | -1.420619 | 5.069250  |
| H | -4.292838  | -1.111326 | 3.582970  |
| H | -5.703030  | -3.025508 | 3.884763  |
| H | -4.070633  | -3.587053 | 4.233701  |
| H | -5.920870  | -5.176286 | 5.050711  |
| H | -4.577727  | -5.351645 | 6.177414  |
| H | -7.525404  | -4.855241 | 6.830140  |
| H | -6.527399  | -6.229171 | 7.315529  |
| H | -5.161949  | -4.761134 | 8.768875  |
| H | -6.852829  | -4.531431 | 9.179565  |
| H | -5.846937  | -0.632470 | 7.483961  |
| O | 7.251433   | -1.294121 | 6.588491  |
| C | 7.293025   | -0.635835 | 7.602243  |
| O | 0.843320   | 0.242620  | 9.312255  |
| C | 2.235623   | -0.062565 | 9.562179  |
| H | 2.362522   | -1.147991 | 9.570640  |
| H | 2.505330   | 0.310845  | 10.553571 |
| C | 3.054238   | 0.595523  | 8.466245  |
| H | 2.719916   | 0.213298  | 7.495483  |
| H | 2.849496   | 1.671649  | 8.466695  |
| C | 4.556943   | 0.347902  | 8.638359  |
| H | 4.745058   | -0.732014 | 8.668875  |
| H | 4.886754   | 0.740150  | 9.607965  |
| C | 5.383852   | 0.992656  | 7.520736  |
| H | 5.092565   | 0.571129  | 6.552084  |
| H | 5.161852   | 2.063362  | 7.476636  |
| C | 6.908020   | 0.833556  | 7.688377  |
| H | 7.204664   | 1.206814  | 8.671226  |
| C | 7.692839   | 1.607150  | 6.596763  |
| H | 8.761913   | 1.388012  | 6.693648  |
| C | 7.501437   | 3.052882  | 6.662409  |
| H | 7.394118   | 1.232537  | 5.612822  |
| C | 7.349352   | 4.243960  | 6.729132  |
| H | 7.219293   | 5.299350  | 6.779469  |

|   |           |           |           |
|---|-----------|-----------|-----------|
| O | 7.678312  | -1.124365 | 8.794700  |
| C | 8.052715  | -2.535623 | 8.819523  |
| C | 8.449300  | -2.884982 | 10.224476 |
| H | 8.870719  | -2.681177 | 8.112255  |
| H | 7.199949  | -3.122365 | 8.475358  |
| C | 7.517574  | -3.431104 | 11.111574 |
| C | 9.753236  | -2.649703 | 10.671858 |
| C | 7.880334  | -3.738048 | 12.421296 |
| H | 6.502261  | -3.618792 | 10.774732 |
| C | 10.119032 | -2.953720 | 11.980446 |
| H | 10.485476 | -2.226520 | 9.990394  |
| H | 7.148236  | -4.164533 | 13.099210 |
| C | 9.182207  | -3.499169 | 12.857732 |
| H | 11.134667 | -2.769091 | 12.315026 |
| H | 9.467037  | -3.739716 | 13.876856 |
| H | -6.591198 | -1.550572 | 9.134138  |

85 atoms

addition of another 7-isomer unit to the 7-isomer chain end,  
structure 11, in toluene

|   |           |          |          |
|---|-----------|----------|----------|
| N | 4.094393  | 6.110485 | 3.691359 |
| C | 2.969883  | 5.446108 | 4.127911 |
| N | 2.382766  | 4.582555 | 3.250029 |
| C | 2.935316  | 4.225688 | 1.958294 |
| C | 3.601950  | 5.454030 | 1.352176 |
| C | 4.633328  | 5.989243 | 2.336606 |
| C | 4.546618  | 6.618611 | 6.068823 |
| C | 3.023087  | 6.613719 | 6.176182 |
| N | 2.430003  | 5.605563 | 5.309794 |
| C | 4.933407  | 6.874378 | 4.617684 |
| H | 2.115725  | 3.865260 | 1.334712 |
| H | 3.664353  | 3.405726 | 2.041790 |
| H | 2.842438  | 6.215432 | 1.150571 |
| H | 4.092418  | 5.209807 | 0.406145 |
| H | 5.516172  | 5.332793 | 2.349740 |
| H | 4.983011  | 6.979396 | 2.022607 |
| H | 5.979566  | 6.594660 | 4.443555 |
| H | 4.848032  | 7.943676 | 4.380852 |
| H | 4.930599  | 5.646677 | 6.394972 |
| H | 4.996828  | 7.382890 | 6.709232 |
| H | 2.638907  | 7.617691 | 5.933272 |
| H | 2.711036  | 6.411443 | 7.204867 |
| H | 1.509205  | 4.156599 | 3.527222 |
| O | -0.158050 | 2.848696 | 3.245775 |
| C | -0.980789 | 3.348742 | 3.982330 |
| O | -0.999056 | 4.694201 | 4.076118 |

|   |           |           |           |
|---|-----------|-----------|-----------|
| C | -1.703044 | 5.406750  | 5.133354  |
| H | -1.475541 | 4.912112  | 6.079955  |
| C | -3.205394 | 5.460385  | 4.868417  |
| H | -3.355324 | 5.726299  | 3.815017  |
| H | -3.623927 | 6.280311  | 5.460168  |
| C | -3.956806 | 4.170535  | 5.212540  |
| H | -3.880708 | 3.993349  | 6.292826  |
| H | -5.022028 | 4.316400  | 5.004240  |
| C | -3.472630 | 2.920039  | 4.471414  |
| H | -3.627127 | 3.036297  | 3.392269  |
| H | -4.095641 | 2.073037  | 4.774303  |
| C | -2.004429 | 2.539106  | 4.746278  |
| H | -1.780095 | 2.625590  | 5.814374  |
| H | -1.823699 | 1.500871  | 4.468112  |
| O | 0.298629  | -3.837278 | 7.046164  |
| O | 0.806029  | 3.703939  | 6.473211  |
| C | 1.390623  | -3.651666 | 7.528624  |
| C | 2.041142  | -2.304770 | 7.761973  |
| H | 3.029113  | -2.324265 | 7.288749  |
| H | 2.240177  | -2.216537 | 8.836428  |
| C | 1.209777  | -1.126011 | 7.258997  |
| H | 1.024783  | -1.244351 | 6.186039  |
| H | 0.224204  | -1.150126 | 7.735760  |
| C | 1.884485  | 0.223950  | 7.525491  |
| H | 2.873162  | 0.238555  | 7.049277  |
| H | 2.069605  | 0.331891  | 8.598808  |
| C | 1.050745  | 1.399456  | 7.006522  |
| H | 0.826373  | 1.244665  | 5.945846  |
| H | 0.082486  | 1.423682  | 7.523711  |
| C | 1.682296  | 2.789987  | 7.114906  |
| H | 2.652095  | 2.787195  | 6.598653  |
| C | 1.917181  | 3.272150  | 8.576179  |
| H | 2.003022  | 4.362734  | 8.541544  |
| C | 3.101966  | 2.739216  | 9.243588  |
| H | 1.020196  | 3.058457  | 9.169527  |
| C | 4.099996  | 2.337213  | 9.783006  |
| H | 4.976273  | 1.967868  | 10.261140 |
| O | 2.199380  | -4.651977 | 7.940121  |
| C | 1.679931  | -6.001631 | 7.776822  |
| C | 2.716115  | -6.961370 | 8.288090  |
| H | 1.460898  | -6.162173 | 6.719866  |
| H | 0.742284  | -6.079722 | 8.330036  |
| C | 3.683386  | -7.488199 | 7.427414  |
| C | 2.742052  | -7.325347 | 9.637755  |
| C | 4.656937  | -8.363138 | 7.904172  |
| H | 3.673005  | -7.211845 | 6.377092  |
| C | 3.713961  | -8.199403 | 10.118552 |

|   |           |           |           |
|---|-----------|-----------|-----------|
| H | 1.995427  | -6.921581 | 10.315389 |
| H | 5.399995  | -8.767782 | 7.224591  |
| C | 4.673529  | -8.720412 | 9.251503  |
| H | 3.720928  | -8.476436 | 11.167796 |
| H | 5.429364  | -9.404374 | 9.623903  |
| H | 1.353290  | 4.421619  | 6.048630  |
| C | -1.028941 | 6.789425  | 5.129627  |
| H | -1.236036 | 7.283842  | 4.173511  |
| C | -1.458201 | 7.640109  | 6.234643  |
| H | 0.053103  | 6.629411  | 5.177957  |
| C | -1.808489 | 8.335110  | 7.151671  |
| H | -2.113130 | 8.952573  | 7.963528  |

85 atoms

addition of another 7-isomer unit to the 7-isomer chain end,  
structure TS12, in toluene

|   |           |           |           |
|---|-----------|-----------|-----------|
| N | -4.548705 | 3.379495  | 0.625397  |
| C | -4.097034 | 2.215068  | 0.094479  |
| N | -4.659345 | 1.712823  | -1.007886 |
| C | -5.731013 | 2.389684  | -1.723698 |
| C | -6.609423 | 3.138574  | -0.729995 |
| C | -5.738055 | 4.066491  | 0.106261  |
| C | -2.460598 | 3.523945  | 1.955432  |
| C | -2.481989 | 2.001579  | 1.915801  |
| N | -3.081241 | 1.558563  | 0.665408  |
| C | -3.875835 | 4.047009  | 1.747168  |
| H | -6.296020 | 1.627646  | -2.261710 |
| H | -5.321648 | 3.081561  | -2.470929 |
| H | -7.120992 | 2.419728  | -0.083376 |
| H | -7.372949 | 3.724088  | -1.247235 |
| H | -5.420746 | 4.934611  | -0.485292 |
| H | -6.299402 | 4.449138  | 0.963958  |
| H | -3.859859 | 5.120079  | 1.533450  |
| H | -4.475354 | 3.907758  | 2.655458  |
| H | -1.800467 | 3.898921  | 1.167804  |
| H | -2.076173 | 3.885390  | 2.911940  |
| H | -3.038304 | 1.607816  | 2.776772  |
| H | -1.475657 | 1.584664  | 1.964642  |
| H | -4.367012 | 0.772141  | -1.351957 |
| O | -3.918223 | -0.682258 | -2.083814 |
| C | -3.465788 | -1.497420 | -1.249686 |
| O | -4.233201 | -1.583460 | -0.086577 |
| C | -3.900342 | -2.537842 | 0.932357  |
| H | -2.817172 | -2.675621 | 0.954701  |
| C | -4.635319 | -3.855898 | 0.675999  |
| H | -5.686061 | -3.608635 | 0.480714  |

|   |           |           |           |
|---|-----------|-----------|-----------|
| H | -4.618064 | -4.458141 | 1.590638  |
| C | -4.068725 | -4.692697 | -0.478054 |
| H | -3.093649 | -5.098222 | -0.177484 |
| H | -4.720522 | -5.560715 | -0.630128 |
| C | -3.893012 | -3.953155 | -1.812330 |
| H | -4.854335 | -3.566185 | -2.168719 |
| H | -3.560080 | -4.678646 | -2.562374 |
| C | -2.861157 | -2.810016 | -1.749762 |
| H | -2.014301 | -3.119881 | -1.134309 |
| H | -2.474557 | -2.599252 | -2.747776 |
| O | 5.093860  | 0.332507  | 2.139461  |
| O | -1.979004 | -0.692089 | -0.415226 |
| C | 5.307579  | 0.111895  | 0.970801  |
| C | 4.259339  | -0.131631 | -0.093787 |
| H | 4.472690  | -1.103121 | -0.554070 |
| H | 4.419332  | 0.603010  | -0.891193 |
| C | 2.825114  | -0.073211 | 0.429676  |
| H | 2.698645  | -0.816741 | 1.223850  |
| H | 2.654162  | 0.899648  | 0.903503  |
| C | 1.785277  | -0.303868 | -0.672553 |
| H | 1.961666  | -1.279855 | -1.142790 |
| H | 1.924738  | 0.437104  | -1.465546 |
| C | 0.349333  | -0.248782 | -0.138660 |
| H | 0.242901  | -0.963817 | 0.685199  |
| H | 0.159505  | 0.743014  | 0.294666  |
| C | -0.783918 | -0.567116 | -1.133384 |
| H | -0.533800 | -1.520295 | -1.628631 |
| C | -0.939999 | 0.504413  | -2.263629 |
| H | -1.942153 | 0.364664  | -2.676804 |
| C | 0.027743  | 0.437385  | -3.354251 |
| H | -0.922678 | 1.504249  | -1.811091 |
| C | 0.799546  | 0.361805  | -4.276097 |
| H | 1.487295  | 0.293618  | -5.085325 |
| O | 6.549965  | 0.053469  | 0.443568  |
| C | 7.648091  | 0.278302  | 1.371586  |
| C | 8.932027  | 0.212866  | 0.594944  |
| H | 7.603467  | -0.483706 | 2.151673  |
| H | 7.506211  | 1.251759  | 1.844230  |
| C | 9.628532  | -0.992598 | 0.471205  |
| C | 9.438568  | 1.353940  | -0.034672 |
| C | 10.809282 | -1.057900 | -0.265335 |
| H | 9.243806  | -1.885376 | 0.955551  |
| C | 10.618033 | 1.292777  | -0.772573 |
| H | 8.905207  | 2.295870  | 0.054893  |
| H | 11.342020 | -1.999484 | -0.350751 |
| C | 11.306004 | 0.085524  | -0.888859 |
| H | 11.002000 | 2.186421  | -1.253940 |

|   |           |           |           |
|---|-----------|-----------|-----------|
| H | 12.227047 | 0.036997  | -1.460778 |
| H | -2.690982 | 0.694560  | 0.207539  |
| C | -4.328926 | -1.866856 | 2.251769  |
| H | -5.413043 | -1.705033 | 2.229900  |
| C | -3.960729 | -2.618527 | 3.447525  |
| H | -3.865621 | -0.876848 | 2.281840  |
| C | -3.642401 | -3.234604 | 4.430577  |
| H | -3.362480 | -3.781216 | 5.300030  |

85 atoms

addition of another 7-isomer unit to the 7-isomer chain end,  
structure I2, in toluene

|   |           |           |          |
|---|-----------|-----------|----------|
| N | -6.835602 | 3.679020  | 6.194909 |
| C | -6.374494 | 2.518438  | 5.616481 |
| N | -6.945262 | 1.906359  | 4.618885 |
| C | -8.128092 | 2.513447  | 4.027268 |
| C | -8.987279 | 3.217594  | 5.074887 |
| C | -8.131822 | 4.241616  | 5.809781 |
| C | -4.728416 | 3.918204  | 7.489268 |
| C | -4.654990 | 2.400234  | 7.395907 |
| N | -5.199178 | 2.000610  | 6.110574 |
| C | -6.176869 | 4.356335  | 7.313023 |
| H | -8.701727 | 1.727878  | 3.527105 |
| H | -7.842699 | 3.232189  | 3.243223 |
| H | -9.368645 | 2.475344  | 5.783788 |
| H | -9.849495 | 3.714690  | 4.620801 |
| H | -7.973729 | 5.131093  | 5.184610 |
| H | -8.638152 | 4.580227  | 6.720752 |
| H | -6.227190 | 5.436295  | 7.134085 |
| H | -6.741568 | 4.163577  | 8.237273 |
| H | -4.102389 | 4.354805  | 6.705625 |
| H | -4.355634 | 4.272574  | 8.453779 |
| H | -5.198280 | 1.945563  | 8.239308 |
| H | -3.621596 | 2.051416  | 7.451248 |
| H | -6.536935 | 0.355690  | 4.014291 |
| O | -6.295696 | -0.510043 | 3.551990 |
| C | -5.568651 | -1.306578 | 4.392776 |
| O | -6.289804 | -1.406539 | 5.600969 |
| C | -5.890839 | -2.390660 | 6.567243 |
| H | -4.834280 | -2.638940 | 6.428751 |
| C | -6.773099 | -3.630228 | 6.415897 |
| H | -7.814984 | -3.288925 | 6.433222 |
| H | -6.637540 | -4.278304 | 7.288071 |
| C | -6.510117 | -4.441489 | 5.141074 |
| H | -5.546050 | -4.958616 | 5.236363 |
| H | -7.266466 | -5.231343 | 5.073206 |



|   |           |           |           |
|---|-----------|-----------|-----------|
| C | -6.504631 | -3.640606 | 3.829424  |
| H | -7.446240 | -3.097663 | 3.703255  |
| H | -6.446318 | -4.351724 | 2.998736  |
| C | -5.327086 | -2.660068 | 3.702651  |
| H | -4.419583 | -3.123760 | 4.101531  |
| H | -5.139741 | -2.447751 | 2.648641  |
| O | 3.100251  | -0.488044 | 6.166276  |
| O | -4.325430 | -0.669443 | 4.804387  |
| C | 3.100361  | -0.652502 | 4.969195  |
| C | 1.882587  | -0.610436 | 4.070251  |
| H | 1.942911  | -1.451443 | 3.372408  |
| H | 1.971236  | 0.288729  | 3.448004  |
| C | 0.560141  | -0.610249 | 4.835776  |
| H | 0.487377  | -1.526110 | 5.432897  |
| H | 0.561119  | 0.215021  | 5.554636  |
| C | -0.654937 | -0.494663 | 3.909060  |
| H | -0.643500 | -1.317497 | 3.183296  |
| H | -0.576393 | 0.423643  | 3.319870  |
| C | -1.973834 | -0.517199 | 4.688786  |
| H | -2.010285 | -1.419180 | 5.309339  |
| H | -2.007070 | 0.330772  | 5.384341  |
| C | -3.257542 | -0.501054 | 3.852712  |
| H | -3.247919 | -1.346696 | 3.159487  |
| C | -3.481713 | 0.800511  | 3.038039  |
| H | -4.546093 | 0.856827  | 2.803739  |
| C | -2.729238 | 0.876336  | 1.789136  |
| H | -3.255796 | 1.666416  | 3.670519  |
| C | -2.144604 | 0.932050  | 0.738825  |
| H | -1.621500 | 0.983239  | -0.186722 |
| O | 4.219283  | -0.887997 | 4.252375  |
| C | 5.465774  | -0.917055 | 5.004639  |
| C | 6.580693  | -1.212144 | 4.042612  |
| H | 5.382675  | -1.679811 | 5.780451  |
| H | 5.594213  | 0.049457  | 5.495363  |
| C | 6.976220  | -2.530073 | 3.796254  |
| C | 7.225446  | -0.174540 | 3.362654  |
| C | 7.997060  | -2.807143 | 2.889840  |
| H | 6.482133  | -3.343946 | 4.318886  |
| C | 8.246284  | -0.447326 | 2.455323  |
| H | 6.925984  | 0.853215  | 3.546228  |
| H | 8.296989  | -3.834542 | 2.710467  |
| C | 8.634082  | -1.765276 | 2.217539  |
| H | 8.740931  | 0.367456  | 1.936558  |
| H | 9.431700  | -1.979202 | 1.513436  |
| H | -4.963342 | 1.080328  | 5.755506  |
| C | -6.048715 | -1.704995 | 7.938470  |
| H | -7.101365 | -1.431840 | 8.074165  |

|   |           |           |           |
|---|-----------|-----------|-----------|
| C | -5.592600 | -2.517394 | 9.062055  |
| H | -5.486139 | -0.767416 | 7.911139  |
| C | -5.199791 | -3.184467 | 9.982703  |
| H | -4.856979 | -3.774680 | 10.799608 |

85 atoms

addition of another 7-isomer unit to the 7-isomer chain end,  
structure TS23, in toluene

|   |           |           |          |
|---|-----------|-----------|----------|
| N | -7.352310 | 3.710761  | 5.743745 |
| C | -6.716402 | 2.514022  | 5.515504 |
| N | -6.708361 | 1.877214  | 4.379449 |
| C | -7.376068 | 2.491971  | 3.241173 |
| C | -8.615073 | 3.276118  | 3.667318 |
| C | -8.215362 | 4.303334  | 4.719031 |
| C | -6.222041 | 3.933820  | 7.942449 |
| C | -6.178951 | 2.411889  | 7.932768 |
| N | -5.998304 | 1.975766  | 6.559284 |
| C | -7.346891 | 4.407561  | 7.031043 |
| H | -7.646553 | 1.701424  | 2.535484 |
| H | -6.685024 | 3.159947  | 2.704471 |
| H | -9.352455 | 2.584013  | 4.087224 |
| H | -9.082767 | 3.781238  | 2.817212 |
| H | -7.699330 | 5.153077  | 4.251870 |
| H | -9.103856 | 4.706085  | 5.217806 |
| H | -7.249203 | 5.481192  | 6.835778 |
| H | -8.318417 | 4.263691  | 7.526440 |
| H | -5.261483 | 4.320223  | 7.589629 |
| H | -6.386825 | 4.315210  | 8.953359 |
| H | -7.097842 | 2.004999  | 8.383005 |
| H | -5.336763 | 2.042484  | 8.521801 |
| H | -6.108088 | 0.281841  | 4.104061 |
| O | -5.752982 | -0.605719 | 3.788831 |
| C | -5.163893 | -1.297997 | 4.810478 |
| O | -6.058042 | -1.288884 | 5.913202 |
| C | -5.886964 | -2.263031 | 6.957336 |
| H | -4.838713 | -2.571309 | 7.008480 |
| C | -6.801613 | -3.460034 | 6.691110 |
| H | -7.800162 | -3.060363 | 6.478458 |
| H | -6.887111 | -4.057151 | 7.604781 |
| C | -6.341812 | -4.368527 | 5.544149 |
| H | -5.448892 | -4.922087 | 5.863598 |
| H | -7.115595 | -5.124696 | 5.370626 |
| C | -6.025836 | -3.659364 | 4.218967 |
| H | -6.899294 | -3.109326 | 3.855396 |
| H | -5.812057 | -4.426027 | 3.466726 |
| C | -4.821891 | -2.707148 | 4.298386 |

|   |           |           |           |
|---|-----------|-----------|-----------|
| H | -4.038184 | -3.142649 | 4.924567  |
| H | -4.392342 | -2.575977 | 3.303320  |
| O | 3.431639  | -2.017656 | 5.766940  |
| O | -3.999024 | -0.626514 | 5.331618  |
| C | 3.371994  | -1.507458 | 4.673406  |
| C | 2.129620  | -0.926552 | 4.032066  |
| H | 2.032272  | -1.362623 | 3.031995  |
| H | 2.315950  | 0.140542  | 3.862587  |
| C | 0.859980  | -1.136131 | 4.855486  |
| H | 0.701636  | -2.208908 | 5.010200  |
| H | 1.002205  | -0.709330 | 5.853676  |
| C | -0.375818 | -0.516119 | 4.194187  |
| H | -0.513168 | -0.949044 | 3.195317  |
| H | -0.204775 | 0.552418  | 4.033920  |
| C | -1.643566 | -0.732597 | 5.027191  |
| H | -1.756407 | -1.802018 | 5.237225  |
| H | -1.535541 | -0.244141 | 6.003614  |
| C | -2.961129 | -0.258826 | 4.404774  |
| H | -3.126813 | -0.758863 | 3.447202  |
| C | -3.059643 | 1.269813  | 4.172397  |
| H | -4.119797 | 1.515106  | 4.069493  |
| C | -2.356272 | 1.767538  | 2.993099  |
| H | -2.707490 | 1.792211  | 5.069777  |
| C | -1.816710 | 2.186182  | 2.002226  |
| H | -1.330392 | 2.551863  | 1.128961  |
| O | 4.438587  | -1.378162 | 3.855862  |
| C | 5.702382  | -1.886126 | 4.369613  |
| C | 6.754441  | -1.652874 | 3.323316  |
| H | 5.581498  | -2.946289 | 4.598227  |
| H | 5.929484  | -1.364944 | 5.301315  |
| C | 7.038234  | -2.634233 | 2.369299  |
| C | 7.450454  | -0.441235 | 3.274433  |
| C | 7.999402  | -2.411326 | 1.385842  |
| H | 6.503384  | -3.579093 | 2.397744  |
| C | 8.411536  | -0.214105 | 2.292471  |
| H | 7.237889  | 0.328177  | 4.010957  |
| H | 8.212617  | -3.182938 | 0.653150  |
| C | 8.687916  | -1.199953 | 1.345971  |
| H | 8.946815  | 0.729590  | 2.267454  |
| H | 9.439013  | -1.025695 | 0.582268  |
| H | -5.704981 | 1.021108  | 6.397140  |
| C | -6.230818 | -1.528167 | 8.267740  |
| H | -7.264125 | -1.167884 | 8.208103  |
| C | -6.051978 | -2.341582 | 9.466505  |
| H | -5.591563 | -0.643117 | 8.336209  |
| C | -5.888656 | -3.008601 | 10.453886 |
| H | -5.747035 | -3.599434 | 11.328029 |

85 atoms

addition of another 7-isomer unit to the 7-isomer chain end,  
structure I3, in toluene

|   |           |           |          |
|---|-----------|-----------|----------|
| N | 6.701065  | 0.250454  | 7.428095 |
| C | 5.451185  | -0.227385 | 7.114940 |
| N | 4.385439  | 0.509947  | 6.969538 |
| C | 4.528653  | 1.953855  | 7.093713 |
| C | 5.574160  | 2.329276  | 8.141031 |
| C | 6.894653  | 1.658456  | 7.784180 |
| C | 7.704043  | -1.975921 | 6.969232 |
| C | 6.337524  | -2.522484 | 7.361151 |
| N | 5.330452  | -1.580188 | 6.907721 |
| C | 7.885154  | -0.595614 | 7.587909 |
| H | 3.553127  | 2.372613  | 7.355188 |
| H | 4.803318  | 2.400741  | 6.125962 |
| H | 5.237679  | 1.986747  | 9.125154 |
| H | 5.714677  | 3.412568  | 8.198290 |
| H | 7.380449  | 2.183036  | 6.950330 |
| H | 7.587185  | 1.700124  | 8.632271 |
| H | 8.736239  | -0.081873 | 7.126925 |
| H | 8.117417  | -0.692089 | 8.658695 |
| H | 7.762201  | -1.913335 | 5.878822 |
| H | 8.505512  | -2.635768 | 7.311253 |
| H | 6.293071  | -2.689275 | 8.448706 |
| H | 6.150083  | -3.483572 | 6.877860 |
| H | 2.809201  | -0.143867 | 7.087486 |
| O | 1.850362  | -0.408406 | 7.256788 |
| C | 1.434466  | -1.412957 | 6.430263 |
| O | 2.367092  | -2.485432 | 6.545011 |
| C | 1.996371  | -3.756491 | 5.979315 |
| H | 1.230801  | -3.602662 | 5.215170 |
| C | 1.485141  | -4.663717 | 7.098530 |
| H | 2.235720  | -4.646010 | 7.897998 |
| H | 1.435808  | -5.695289 | 6.734116 |
| C | 0.112654  | -4.263018 | 7.657633 |
| H | -0.659569 | -4.513321 | 6.918417 |
| H | -0.098565 | -4.888002 | 8.532519 |
| C | -0.051909 | -2.783799 | 8.045477 |
| H | 0.696251  | -2.491489 | 8.788848 |
| H | -1.026759 | -2.670439 | 8.531564 |
| C | 0.009016  | -1.821678 | 6.848010 |
| H | -0.504756 | -2.265950 | 5.991512 |
| H | -0.518197 | -0.894483 | 7.083720 |
| O | -4.393703 | 0.419724  | 0.478530 |
| O | 1.491297  | -1.060594 | 5.039727 |

|   |           |           |           |
|---|-----------|-----------|-----------|
| C | -3.967083 | 1.537099  | 0.649304  |
| C | -2.807289 | 1.915530  | 1.545926  |
| H | -3.211003 | 2.534806  | 2.356261  |
| H | -2.143664 | 2.578475  | 0.981227  |
| C | -2.049972 | 0.712748  | 2.106501  |
| H | -2.751722 | 0.056192  | 2.630606  |
| H | -1.649138 | 0.119242  | 1.277351  |
| C | -0.912252 | 1.123096  | 3.047666  |
| H | -1.321957 | 1.701477  | 3.885444  |
| H | -0.231493 | 1.800468  | 2.523530  |
| C | -0.144576 | -0.089018 | 3.586593  |
| H | -0.855760 | -0.789958 | 4.036992  |
| H | 0.328337  | -0.629886 | 2.757572  |
| C | 0.931470  | 0.201071  | 4.638674  |
| H | 0.493335  | 0.698203  | 5.507556  |
| C | 2.117697  | 1.060710  | 4.132858  |
| H | 2.950760  | 0.886220  | 4.819611  |
| C | 1.866635  | 2.497223  | 4.056671  |
| H | 2.439934  | 0.683380  | 3.154947  |
| C | 1.685380  | 3.686559  | 4.024014  |
| H | 1.515184  | 4.736604  | 3.988275  |
| O | -4.489935 | 2.630112  | 0.053688  |
| C | -5.632835 | 2.398200  | -0.817702 |
| C | -6.053953 | 3.721459  | -1.390126 |
| H | -6.427258 | 1.936173  | -0.228779 |
| H | -5.336829 | 1.692154  | -1.595262 |
| C | -6.965164 | 4.532936  | -0.707527 |
| C | -5.524260 | 4.171959  | -2.602783 |
| C | -7.341290 | 5.769565  | -1.226239 |
| H | -7.382844 | 4.192996  | 0.235701  |
| C | -5.898200 | 5.407968  | -3.125275 |
| H | -4.815254 | 3.549914  | -3.141311 |
| H | -8.051991 | 6.388405  | -0.688062 |
| C | -6.807988 | 6.209211  | -2.437151 |
| H | -5.482058 | 5.744249  | -4.069433 |
| H | -7.102657 | 7.171069  | -2.844286 |
| H | 4.373080  | -1.900568 | 6.813318  |
| C | 3.255227  | -4.301180 | 5.277568  |
| H | 4.032051  | -4.486455 | 6.028799  |
| C | 3.015196  | -5.520568 | 4.512165  |
| H | 3.634311  | -3.516554 | 4.616124  |
| C | 2.805950  | -6.518741 | 3.874737  |
| H | 2.624072  | -7.401875 | 3.308860  |

85 atoms

addition of another 7-isomer unit to the 7-isomer chain end,  
structure TSr, in toluene

|   |           |           |          |
|---|-----------|-----------|----------|
| N | 6.342617  | 0.489736  | 7.579323 |
| C | 5.192217  | -0.136024 | 7.163091 |
| N | 4.167107  | 0.465295  | 6.623431 |
| C | 4.266478  | 1.899444  | 6.387224 |
| C | 5.060747  | 2.598338  | 7.488221 |
| C | 6.436146  | 1.951751  | 7.592896 |
| C | 7.449738  | -1.709595 | 7.933285 |
| C | 6.037589  | -2.226131 | 8.177567 |
| N | 5.138743  | -1.500741 | 7.298889 |
| C | 7.480559  | -0.206551 | 8.183283 |
| H | 3.254414  | 2.307317  | 6.324597 |
| H | 4.735564  | 2.099101  | 5.412301 |
| H | 4.527631  | 2.494003  | 8.439014 |
| H | 5.171116  | 3.667896  | 7.286990 |
| H | 7.081760  | 2.283710  | 6.768617 |
| H | 6.930903  | 2.250421  | 8.523926 |
| H | 8.401019  | 0.226916  | 7.776228 |
| H | 7.490145  | -0.007328 | 9.264909 |
| H | 7.734259  | -1.928274 | 6.900082 |
| H | 8.170434  | -2.201569 | 8.591603 |
| H | 5.768951  | -2.107396 | 9.238802 |
| H | 5.962901  | -3.290012 | 7.942055 |
| H | 2.613248  | -0.227711 | 6.724267 |
| O | 1.664394  | -0.521502 | 6.916853 |
| C | 1.319495  | -1.684327 | 6.294813 |
| O | 2.468792  | -2.537112 | 6.328564 |
| C | 2.297620  | -3.910176 | 5.935435 |
| H | 1.408365  | -3.997199 | 5.306497 |
| C | 2.168185  | -4.771601 | 7.192263 |
| H | 3.019987  | -4.533110 | 7.841504 |
| H | 2.268673  | -5.827067 | 6.918602 |
| C | 0.852678  | -4.576282 | 7.960160 |
| H | 0.037501  | -5.042223 | 7.391350 |
| H | 0.917904  | -5.136121 | 8.899904 |
| C | 0.455030  | -3.121876 | 8.267153 |
| H | 1.242281  | -2.614644 | 8.834704 |
| H | -0.423699 | -3.145525 | 8.920549 |
| C | 0.109197  | -2.301822 | 7.015574 |
| H | -0.448625 | -2.918413 | 6.306233 |
| H | -0.539789 | -1.460694 | 7.272451 |
| O | -4.748800 | 0.729071  | 0.563458 |
| O | 0.974345  | -1.536758 | 4.904071 |
| C | -4.139378 | 1.767916  | 0.657457 |
| C | -2.835084 | 1.967118  | 1.399916 |
| H | -2.999946 | 2.743079  | 2.156389 |

|   |           |           |           |
|---|-----------|-----------|-----------|
| H | -2.114136 | 2.400368  | 0.697684  |
| C | -2.290430 | 0.688092  | 2.033240  |
| H | -3.042306 | 0.272006  | 2.711862  |
| H | -2.143362 | -0.066806 | 1.253453  |
| C | -0.976107 | 0.919975  | 2.786849  |
| H | -1.133112 | 1.669325  | 3.573240  |
| H | -0.236787 | 1.351147  | 2.106604  |
| C | -0.438622 | -0.372630 | 3.411008  |
| H | -1.228470 | -0.830867 | 4.015947  |
| H | -0.203598 | -1.098567 | 2.622791  |
| C | 0.783243  | -0.238751 | 4.327982  |
| H | 0.582278  | 0.483878  | 5.122032  |
| C | 2.101889  | 0.155688  | 3.613693  |
| H | 2.922432  | -0.030358 | 4.313379  |
| C | 2.194274  | 1.542265  | 3.163574  |
| H | 2.254092  | -0.522699 | 2.765866  |
| C | 2.303067  | 2.687558  | 2.810004  |
| H | 2.385946  | 3.700275  | 2.493206  |
| O | -4.554336 | 2.924729  | 0.097656  |
| C | -5.805309 | 2.862341  | -0.644059 |
| C | -6.097394 | 4.236655  | -1.175152 |
| H | -6.588589 | 2.509358  | 0.028891  |
| H | -5.695052 | 2.129542  | -1.445352 |
| C | -6.843962 | 5.146208  | -0.420438 |
| C | -5.608417 | 4.634684  | -2.422927 |
| C | -7.098738 | 6.428042  | -0.902425 |
| H | -7.228776 | 4.847691  | 0.550374  |
| C | -5.860706 | 5.915584  | -2.908444 |
| H | -5.027227 | 3.936078  | -3.017715 |
| H | -7.682651 | 7.123275  | -0.307965 |
| C | -6.607132 | 6.814878  | -2.148305 |
| H | -5.478032 | 6.210743  | -3.880120 |
| H | -6.807480 | 7.812099  | -2.526695 |
| H | 4.235584  | -1.902434 | 7.073531  |
| C | 3.523414  | -4.260702 | 5.069089  |
| H | 4.433700  | -4.152414 | 5.670035  |
| C | 3.469027  | -5.599624 | 4.490345  |
| H | 3.590008  | -3.515485 | 4.271191  |
| C | 3.410248  | -6.699347 | 4.006835  |
| H | 3.362322  | -7.672026 | 3.576934  |

85 atoms

addition of another 7-isomer unit to the 7-isomer chain end,  
structure I3r, in toluene

|   |          |           |          |
|---|----------|-----------|----------|
| N | 5.091209 | 0.835480  | 3.107875 |
| C | 4.031950 | -0.002437 | 2.856666 |

|   |           |           |           |
|---|-----------|-----------|-----------|
| N | 2.828801  | 0.386195  | 2.539028  |
| C | 2.588703  | 1.813496  | 2.378008  |
| C | 3.425985  | 2.641503  | 3.350503  |
| C | 4.896258  | 2.285771  | 3.168836  |
| C | 6.657246  | -1.096960 | 3.139204  |
| C | 5.441281  | -1.898669 | 3.585952  |
| N | 4.276480  | -1.353583 | 2.912999  |
| C | 6.433945  | 0.374699  | 3.466797  |
| H | 1.522983  | 2.000440  | 2.538463  |
| H | 2.803011  | 2.124044  | 1.345100  |
| H | 3.114841  | 2.417193  | 4.376184  |
| H | 3.284013  | 3.714199  | 3.189638  |
| H | 5.294673  | 2.747187  | 2.255072  |
| H | 5.490101  | 2.671791  | 4.004802  |
| H | 7.162026  | 0.995802  | 2.933065  |
| H | 6.598336  | 0.548737  | 4.540274  |
| H | 6.792649  | -1.229080 | 2.062000  |
| H | 7.565541  | -1.445681 | 3.637431  |
| H | 5.344772  | -1.862540 | 4.682284  |
| H | 5.540376  | -2.949246 | 3.304342  |
| H | 1.478655  | -0.613885 | 2.751593  |
| O | 0.619316  | -1.085436 | 3.003520  |
| C | 0.426873  | -2.274461 | 2.363201  |
| O | 1.733759  | -2.868808 | 2.197459  |
| C | 1.798042  | -4.251508 | 1.807078  |
| H | 0.877465  | -4.519772 | 1.281631  |
| C | 1.998449  | -5.123207 | 3.049036  |
| H | 2.850737  | -4.709959 | 3.603065  |
| H | 2.289613  | -6.130838 | 2.734702  |
| C | 0.775038  | -5.221190 | 3.969299  |
| H | 0.012405  | -5.843464 | 3.483210  |
| H | 1.069259  | -5.763028 | 4.875237  |
| C | 0.127929  | -3.885071 | 4.366155  |
| H | 0.857737  | -3.228956 | 4.852023  |
| H | -0.641680 | -4.091992 | 5.117299  |
| C | -0.526853 | -3.147138 | 3.191474  |
| H | -1.026771 | -3.857257 | 2.527611  |
| H | -1.299673 | -2.462637 | 3.548037  |
| O | -5.483290 | 0.870768  | -3.282345 |
| O | -0.195338 | -2.157566 | 1.081243  |
| C | -4.689811 | 1.781409  | -3.261328 |
| C | -3.342672 | 1.768509  | -2.570492 |
| H | -3.342697 | 2.579211  | -1.832463 |
| H | -2.584971 | 2.053083  | -3.308877 |
| C | -3.004314 | 0.430230  | -1.916337 |
| H | -3.791863 | 0.166888  | -1.202886 |
| H | -3.017112 | -0.356992 | -2.677796 |



|   |           |           |           |
|---|-----------|-----------|-----------|
| C | -1.644024 | 0.448478  | -1.210410 |
| H | -1.643087 | 1.232193  | -0.441802 |
| H | -0.864280 | 0.725292  | -1.924402 |
| C | -1.320781 | -0.900961 | -0.558531 |
| H | -2.151063 | -1.185203 | 0.095767  |
| H | -1.258057 | -1.683161 | -1.325234 |
| C | -0.058883 | -0.953650 | 0.311893  |
| H | -0.044046 | -0.099968 | 0.994082  |
| C | 1.277648  | -1.003399 | -0.470187 |
| H | 2.072817  | -1.210992 | 0.249441  |
| C | 1.639721  | 0.206797  | -1.202972 |
| H | 1.239004  | -1.854920 | -1.159854 |
| C | 1.981324  | 1.194375  | -1.799883 |
| H | 2.268757  | 2.070444  | -2.331567 |
| O | -4.907338 | 2.968884  | -3.866765 |
| C | -6.179483 | 3.107761  | -4.560339 |
| C | -6.233403 | 4.484947  | -5.157486 |
| H | -6.984115 | 2.942029  | -3.841822 |
| H | -6.244143 | 2.329400  | -5.322517 |
| C | -6.731836 | 5.560907  | -4.416836 |
| C | -5.766498 | 4.716012  | -6.454679 |
| C | -6.764863 | 6.842482  | -4.961169 |
| H | -7.097231 | 5.392569  | -3.407988 |
| C | -5.798065 | 5.996213  | -7.002942 |
| H | -5.377100 | 3.887370  | -7.038998 |
| H | -7.157542 | 7.668398  | -4.376894 |
| C | -6.297822 | 7.062159  | -6.256383 |
| H | -5.435907 | 6.161309  | -8.012544 |
| H | -6.326195 | 8.059547  | -6.683217 |
| H | 3.443763  | -1.924397 | 2.822698  |
| C | 2.966447  | -4.363912 | 0.806166  |
| H | 3.899216  | -4.084284 | 1.309308  |
| C | 3.103337  | -5.690781 | 0.213122  |
| H | 2.810574  | -3.625865 | 0.014891  |
| C | 3.201653  | -6.782372 | -0.282166 |
| H | 3.291812  | -7.747313 | -0.722626 |

85 atoms

addition of another 7-isomer unit to the 7-isomer chain end,  
structure TSr2, in toluene

|   |          |          |          |
|---|----------|----------|----------|
| N | 4.553043 | 1.151993 | 2.951502 |
| C | 3.619728 | 0.161986 | 2.757022 |
| N | 2.398199 | 0.356779 | 2.344320 |
| C | 2.005358 | 1.712341 | 1.989208 |
| C | 2.668081 | 2.747423 | 2.895920 |
| C | 4.179678 | 2.563721 | 2.839569 |

|   |           |           |           |
|---|-----------|-----------|-----------|
| C | 6.340559  | -0.548726 | 3.266746  |
| C | 5.211940  | -1.449547 | 3.753349  |
| N | 4.022199  | -1.128689 | 2.988483  |
| C | 5.918614  | 0.907919  | 3.419547  |
| H | 0.916295  | 1.783302  | 2.064014  |
| H | 2.256967  | 1.923588  | 0.938712  |
| H | 2.314799  | 2.603654  | 3.922292  |
| H | 2.410200  | 3.767893  | 2.597779  |
| H | 4.582711  | 2.974273  | 1.903814  |
| H | 4.662326  | 3.108326  | 3.658943  |
| H | 6.594775  | 1.558757  | 2.853829  |
| H | 5.997535  | 1.211957  | 4.473686  |
| H | 6.547759  | -0.774641 | 2.216850  |
| H | 7.257850  | -0.722018 | 3.835481  |
| H | 5.059701  | -1.315348 | 4.835561  |
| H | 5.452425  | -2.502210 | 3.589405  |
| H | 1.192163  | -0.808469 | 2.585867  |
| O | 0.396004  | -1.392218 | 2.806841  |
| C | 0.413044  | -2.606556 | 2.183459  |
| O | 1.797044  | -3.024400 | 2.144454  |
| C | 2.086062  | -4.403441 | 1.859128  |
| H | 1.273917  | -4.826209 | 1.260543  |
| C | 2.267466  | -5.177757 | 3.167906  |
| H | 2.984937  | -4.617121 | 3.780263  |
| H | 2.733492  | -6.143593 | 2.946941  |
| C | 0.978751  | -5.417204 | 3.963007  |
| H | 0.365888  | -6.159237 | 3.434841  |
| H | 1.246532  | -5.878043 | 4.920525  |
| C | 0.117452  | -4.172518 | 4.222299  |
| H | 0.694031  | -3.403738 | 4.747518  |
| H | -0.695705 | -4.457008 | 4.898382  |
| C | -0.495989 | -3.576502 | 2.949436  |
| H | -0.818953 | -4.372044 | 2.272729  |
| H | -1.388991 | -2.995094 | 3.188271  |
| O | -5.587214 | 1.438926  | -2.414171 |
| O | -0.110002 | -2.589189 | 0.854107  |
| C | -4.625246 | 2.085593  | -2.754275 |
| C | -3.181611 | 1.767493  | -2.427343 |
| H | -2.760210 | 2.635357  | -1.907166 |
| H | -2.632062 | 1.705941  | -3.373433 |
| C | -3.007153 | 0.493029  | -1.603411 |
| H | -3.577188 | 0.582315  | -0.672872 |
| H | -3.450423 | -0.349923 | -2.144126 |
| C | -1.537121 | 0.194163  | -1.288964 |
| H | -1.102208 | 1.037943  | -0.738393 |
| H | -0.972169 | 0.123875  | -2.222917 |
| C | -1.376813 | -1.090312 | -0.468942 |

|   |           |           |           |
|---|-----------|-----------|-----------|
| H | -2.012749 | -1.029312 | 0.420598  |
| H | -1.742542 | -1.950005 | -1.044280 |
| C | 0.032955  | -1.415998 | 0.036759  |
| H | 0.408098  | -0.590061 | 0.641612  |
| C | 1.073813  | -1.737691 | -1.062239 |
| H | 1.923941  | -2.207004 | -0.561892 |
| C | 1.573163  | -0.594166 | -1.821959 |
| H | 0.657157  | -2.488233 | -1.744017 |
| C | 2.026970  | 0.333022  | -2.440132 |
| H | 2.414202  | 1.156965  | -2.991485 |
| O | -4.712497 | 3.212418  | -3.493729 |
| C | -6.055608 | 3.622476  | -3.876454 |
| C | -5.939823 | 4.867189  | -4.709226 |
| H | -6.637995 | 3.791035  | -2.968998 |
| H | -6.521818 | 2.803819  | -4.427517 |
| C | -6.024403 | 6.130258  | -4.116869 |
| C | -5.724255 | 4.780268  | -6.088134 |
| C | -5.898257 | 7.285115  | -4.885986 |
| H | -6.191431 | 6.209600  | -3.046622 |
| C | -5.596527 | 5.932087  | -6.860291 |
| H | -5.657081 | 3.803714  | -6.558812 |
| H | -5.969706 | 8.259711  | -4.414003 |
| C | -5.683911 | 7.187582  | -6.259777 |
| H | -5.432788 | 5.850843  | -7.930013 |
| H | -5.588375 | 8.086069  | -6.860913 |
| H | 3.289263  | -1.819732 | 2.880427  |
| C | 3.366377  | -4.405847 | 0.997470  |
| H | 4.190619  | -3.974550 | 1.576893  |
| C | 3.742650  | -5.729802 | 0.511470  |
| H | 3.211043  | -3.739052 | 0.145239  |
| C | 4.039541  | -6.820729 | 0.101281  |
| H | 4.305229  | -7.785120 | -0.262908 |

85 atoms

addition of another 7-isomer unit to the 7-isomer chain end,  
structure I3r2, in toluene

|   |           |          |          |
|---|-----------|----------|----------|
| N | -0.118523 | 3.693673 | 4.398496 |
| C | 0.058725  | 2.709608 | 3.455338 |
| N | 0.718774  | 2.852248 | 2.339254 |
| C | 1.374683  | 4.127988 | 2.095873 |
| C | 0.560693  | 5.297090 | 2.646951 |
| C | 0.308227  | 5.069375 | 4.132169 |
| C | -1.070111 | 2.039807 | 5.993744 |
| C | -1.496688 | 1.280524 | 4.743617 |
| N | -0.475210 | 1.475923 | 3.731939 |
| C | -0.870113 | 3.509081 | 5.641519 |

|   |           |           |           |
|---|-----------|-----------|-----------|
| H | 1.519107  | 4.238470  | 1.017402  |
| H | 2.380177  | 4.138346  | 2.545107  |
| H | -0.393051 | 5.353407  | 2.112198  |
| H | 1.076813  | 6.250871  | 2.503210  |
| H | 1.212713  | 5.290275  | 4.715035  |
| H | -0.475541 | 5.743859  | 4.494881  |
| H | -0.330323 | 4.021286  | 6.445957  |
| H | -1.846056 | 4.008059  | 5.549516  |
| H | -0.137259 | 1.609894  | 6.369622  |
| H | -1.821353 | 1.955196  | 6.783266  |
| H | -2.486633 | 1.627394  | 4.408787  |
| H | -1.580227 | 0.210178  | 4.944739  |
| H | 0.395223  | 1.814477  | 1.001435  |
| O | 0.118913  | 1.348104  | 0.152555  |
| C | 0.409179  | 0.008796  | 0.138993  |
| O | 0.213218  | -0.449949 | 1.492582  |
| C | 0.190885  | -1.866304 | 1.731715  |
| H | 0.754123  | -2.373084 | 0.942662  |
| C | -1.258164 | -2.356352 | 1.770598  |
| H | -1.798064 | -1.722299 | 2.485127  |
| H | -1.279421 | -3.372815 | 2.177366  |
| C | -1.977745 | -2.344386 | 0.415580  |
| H | -1.570022 | -3.147227 | -0.212394 |
| H | -3.029131 | -2.602909 | 0.584626  |
| C | -1.902283 | -1.027136 | -0.372859 |
| H | -2.284771 | -0.193667 | 0.225809  |
| H | -2.570108 | -1.112070 | -1.236566 |
| C | -0.494660 | -0.693298 | -0.882518 |
| H | 0.005364  | -1.598981 | -1.235794 |
| H | -0.545559 | -0.014214 | -1.736030 |
| O | 5.645515  | 5.622952  | -3.033799 |
| O | 1.735383  | -0.294099 | -0.272091 |
| C | 6.111957  | 5.548063  | -1.922038 |
| C | 5.787322  | 4.486091  | -0.893052 |
| H | 5.541701  | 4.991699  | 0.047026  |
| H | 6.712936  | 3.934723  | -0.688659 |
| C | 4.670013  | 3.536998  | -1.323094 |
| H | 3.760622  | 4.113750  | -1.523288 |
| H | 4.940442  | 3.069178  | -2.275240 |
| C | 4.380945  | 2.457598  | -0.274179 |
| H | 4.108073  | 2.933596  | 0.675764  |
| H | 5.297534  | 1.893872  | -0.072647 |
| C | 3.258406  | 1.512441  | -0.715439 |
| H | 2.370093  | 2.094314  | -0.975269 |
| H | 3.555119  | 0.981182  | -1.628540 |
| C | 2.811221  | 0.465483  | 0.311066  |
| H | 2.463964  | 0.952222  | 1.226123  |

|   |           |           |           |
|---|-----------|-----------|-----------|
| C | 3.901471  | -0.571216 | 0.676876  |
| H | 3.393980  | -1.466264 | 1.047607  |
| C | 4.862469  | -0.132193 | 1.685134  |
| H | 4.428085  | -0.880284 | -0.233522 |
| C | 5.638603  | 0.199900  | 2.542163  |
| H | 6.327963  | 0.503742  | 3.294073  |
| O | 7.018170  | 6.424685  | -1.437379 |
| C | 7.430114  | 7.484505  | -2.346002 |
| C | 8.434169  | 8.343103  | -1.631198 |
| H | 6.545399  | 8.050830  | -2.641559 |
| H | 7.849878  | 7.024986  | -3.242720 |
| C | 8.028273  | 9.488898  | -0.941407 |
| C | 9.788945  | 7.996798  | -1.628320 |
| C | 8.956824  | 10.275636 | -0.263114 |
| H | 6.978518  | 9.767531  | -0.936951 |
| C | 10.720009 | 8.779612  | -0.950540 |
| H | 10.115406 | 7.108753  | -2.161629 |
| H | 8.628836  | 11.165063 | 0.265161  |
| C | 10.304925 | 9.921728  | -0.266515 |
| H | 11.768949 | 8.501489  | -0.958840 |
| H | 11.030022 | 10.534955 | 0.258782  |
| H | -0.391268 | 0.810373  | 2.972080  |
| C | 0.929364  | -2.083143 | 3.068959  |
| H | 0.371820  | -1.585281 | 3.870569  |
| C | 1.129652  | -3.489458 | 3.404511  |
| H | 1.897302  | -1.576555 | 3.014283  |
| C | 1.302353  | -4.650618 | 3.666075  |
| H | 1.457640  | -5.676994 | 3.902058  |

85 atoms

addition of another 7-isomer unit to the 7-isomer chain end,  
structure TS34, in toluene

|   |           |          |          |
|---|-----------|----------|----------|
| N | -0.639142 | 3.443679 | 4.533073 |
| C | -0.357444 | 2.593998 | 3.515555 |
| N | 0.328874  | 3.020953 | 2.448751 |
| C | 0.832207  | 4.381715 | 2.328333 |
| C | -0.129349 | 5.340000 | 3.020500 |
| C | -0.346609 | 4.880607 | 4.456477 |
| C | -1.150234 | 1.475004 | 5.949481 |
| C | -1.572325 | 0.810971 | 4.644148 |
| N | -0.757410 | 1.321232 | 3.551381 |
| C | -1.241051 | 2.987152 | 5.792409 |
| H | 0.921581  | 4.605861 | 1.264961 |
| H | 1.834875  | 4.463310 | 2.766653 |
| H | -1.081131 | 5.351858 | 2.481562 |
| H | 0.266325  | 6.358214 | 3.020666 |

|   |           |           |           |
|---|-----------|-----------|-----------|
| H | 0.537615  | 5.098095  | 5.068739  |
| H | -1.189023 | 5.414887  | 4.905882  |
| H | -0.720035 | 3.490607  | 6.612487  |
| H | -2.287314 | 3.315606  | 5.824287  |
| H | -0.124095 | 1.181675  | 6.189101  |
| H | -1.789503 | 1.156571  | 6.776160  |
| H | -2.637407 | 0.991513  | 4.450168  |
| H | -1.432002 | -0.269363 | 4.687458  |
| H | 0.368306  | 2.402470  | 1.620184  |
| O | 0.327420  | 1.525673  | 0.175017  |
| C | 0.566227  | 0.321861  | -0.026027 |
| O | 0.320531  | -0.407637 | 1.768617  |
| C | 0.210096  | -1.784191 | 1.918493  |
| H | 0.759241  | -2.299648 | 1.110732  |
| C | -1.259267 | -2.241554 | 1.882936  |
| H | -1.806070 | -1.636767 | 2.619121  |
| H | -1.342859 | -3.283987 | 2.214052  |
| C | -1.941387 | -2.113247 | 0.513073  |
| H | -1.574526 | -2.913343 | -0.143830 |
| H | -3.012049 | -2.312846 | 0.646309  |
| C | -1.781345 | -0.774592 | -0.230876 |
| H | -2.033564 | 0.067539  | 0.419538  |
| H | -2.515264 | -0.764203 | -1.044837 |
| C | -0.385938 | -0.549592 | -0.835860 |
| H | 0.096527  | -1.504277 | -1.056597 |
| H | -0.477454 | -0.026056 | -1.795032 |
| O | 5.887200  | 5.635360  | -3.213378 |
| O | 1.859772  | -0.117345 | -0.255460 |
| C | 6.338152  | 5.598333  | -2.093457 |
| C | 5.958139  | 4.605307  | -1.015681 |
| H | 5.652794  | 5.174572  | -0.130420 |
| H | 6.871168  | 4.078229  | -0.715538 |
| C | 4.871172  | 3.620421  | -1.442854 |
| H | 3.976685  | 4.174565  | -1.746522 |
| H | 5.203344  | 3.081129  | -2.336011 |
| C | 4.516681  | 2.622640  | -0.334860 |
| H | 4.181716  | 3.169594  | 0.556214  |
| H | 5.418700  | 2.082836  | -0.030298 |
| C | 3.426401  | 1.637656  | -0.770033 |
| H | 2.551649  | 2.195309  | -1.116317 |
| H | 3.776934  | 1.047224  | -1.625885 |
| C | 2.925320  | 0.667726  | 0.305164  |
| H | 2.535576  | 1.215299  | 1.164424  |
| C | 3.965889  | -0.364393 | 0.792941  |
| H | 3.406882  | -1.192404 | 1.236993  |
| C | 4.920641  | 0.133883  | 1.779650  |
| H | 4.501090  | -0.781406 | -0.068144 |

|   |           |           |           |
|---|-----------|-----------|-----------|
| C | 5.693376  | 0.514868  | 2.619582  |
| H | 6.381933  | 0.857070  | 3.355493  |
| O | 7.271868  | 6.463281  | -1.640880 |
| C | 7.732739  | 7.461169  | -2.595081 |
| C | 8.764599  | 8.312993  | -1.912555 |
| H | 6.873854  | 8.047309  | -2.926085 |
| H | 8.140620  | 6.942520  | -3.464590 |
| C | 8.401294  | 9.511960  | -1.293099 |
| C | 10.102475 | 7.908311  | -1.869727 |
| C | 9.355094  | 10.293783 | -0.644692 |
| H | 7.365062  | 9.836265  | -1.320476 |
| C | 11.058527 | 8.685988  | -1.221541 |
| H | 10.395901 | 6.978572  | -2.348351 |
| H | 9.060307  | 11.224816 | -0.171376 |
| C | 10.685948 | 9.881501  | -0.607785 |
| H | 12.094042 | 8.362191  | -1.198435 |
| H | 11.430825 | 10.490617 | -0.105912 |
| H | -0.376869 | 0.643400  | 2.831413  |
| C | 0.904922  | -2.212136 | 3.248260  |
| H | 0.342826  | -1.795316 | 4.093565  |
| C | 1.059293  | -3.652087 | 3.429258  |
| H | 1.887349  | -1.730155 | 3.268672  |
| C | 1.186659  | -4.843449 | 3.550285  |
| H | 1.301748  | -5.895818 | 3.659709  |

85 atoms

addition of another 7-isomer unit to the 7-isomer chain end,  
structure I4, in toluene

|   |           |          |           |
|---|-----------|----------|-----------|
| N | -5.372451 | 3.415389 | 0.029273  |
| C | -4.826770 | 2.158079 | -0.102083 |
| N | -4.348957 | 1.812460 | -1.347951 |
| C | -4.057212 | 2.815258 | -2.359352 |
| C | -5.233310 | 3.778242 | -2.423475 |
| C | -5.433967 | 4.403683 | -1.049381 |
| C | -5.175796 | 3.095132 | 2.463607  |
| C | -5.325763 | 1.609953 | 2.145318  |
| N | -4.766776 | 1.266181 | 0.845915  |
| C | -5.805885 | 3.904963 | 1.338951  |
| H | -3.912269 | 2.300789 | -3.311183 |
| H | -3.128890 | 3.366118 | -2.141545 |
| H | -6.129833 | 3.228369 | -2.724688 |
| H | -5.059037 | 4.566240 | -3.160738 |
| H | -4.672541 | 5.178308 | -0.875140 |
| H | -6.408059 | 4.903148 | -0.997024 |
| H | -5.517311 | 4.958946 | 1.417449  |
| H | -6.902193 | 3.869432 | 1.404119  |

|   |           |           |           |
|---|-----------|-----------|-----------|
| H | -4.111821 | 3.340651  | 2.545232  |
| H | -5.648934 | 3.350669  | 3.416276  |
| H | -6.392004 | 1.335872  | 2.194681  |
| H | -4.819933 | 1.007654  | 2.905911  |
| H | -3.737456 | 1.004848  | -1.344433 |
| O | -2.239033 | -0.227254 | -1.872627 |
| C | -2.056290 | -1.399259 | -1.621957 |
| O | -3.770047 | -1.341178 | 0.646774  |
| C | -4.767086 | -2.331352 | 0.836060  |
| H | -4.245487 | -3.293052 | 0.778535  |
| C | -5.865967 | -2.281667 | -0.236869 |
| H | -6.193281 | -1.239205 | -0.334473 |
| H | -6.732317 | -2.842766 | 0.131174  |
| C | -5.510904 | -2.845552 | -1.623383 |
| H | -5.272255 | -3.913165 | -1.528745 |
| H | -6.425032 | -2.805047 | -2.226873 |
| C | -4.393548 | -2.138909 | -2.413377 |
| H | -4.506756 | -1.056930 | -2.319930 |
| H | -4.537596 | -2.359394 | -3.475463 |
| C | -2.960184 | -2.544209 | -2.015919 |
| H | -2.949960 | -3.259195 | -1.192728 |
| H | -2.458039 | -3.056439 | -2.845570 |
| O | 6.590843  | -2.142380 | -1.245966 |
| O | -0.956457 | -1.860683 | -0.996740 |
| C | 6.439340  | -1.107433 | -0.641383 |
| C | 5.110000  | -0.474682 | -0.287097 |
| H | 5.068081  | 0.501787  | -0.784062 |
| H | 5.118472  | -0.251078 | 0.785055  |
| C | 3.905626  | -1.334380 | -0.666538 |
| H | 3.943746  | -1.558105 | -1.737421 |
| H | 3.976922  | -2.301342 | -0.157123 |
| C | 2.573325  | -0.661667 | -0.319573 |
| H | 2.501613  | 0.301103  | -0.840640 |
| H | 2.549321  | -0.426022 | 0.748711  |
| C | 1.373617  | -1.538028 | -0.695075 |
| H | 1.442487  | -1.810453 | -1.754131 |
| H | 1.408296  | -2.479623 | -0.134155 |
| C | 0.004809  | -0.895780 | -0.482733 |
| H | -0.094338 | 0.020415  | -1.065108 |
| C | -0.385258 | -0.617446 | 0.987166  |
| H | -1.477636 | -0.589941 | 1.047761  |
| C | 0.153681  | 0.627800  | 1.526465  |
| H | -0.068996 | -1.462885 | 1.609308  |
| C | 0.571242  | 1.663467  | 1.973627  |
| H | 0.944403  | 2.578708  | 2.368558  |
| O | 7.464082  | -0.352028 | -0.193276 |
| C | 8.800573  | -0.850790 | -0.485054 |



|   |           |           |           |
|---|-----------|-----------|-----------|
| C | 9.792592  | 0.113485  | 0.099490  |
| H | 8.906304  | -0.940036 | -1.567621 |
| H | 8.897555  | -1.848665 | -0.054351 |
| C | 10.248020 | 1.203989  | -0.647478 |
| C | 10.259242 | -0.052649 | 1.406708  |
| C | 11.152875 | 2.110569  | -0.100408 |
| H | 9.892196  | 1.342433  | -1.664300 |
| C | 11.164331 | 0.851664  | 1.957486  |
| H | 9.912254  | -0.896441 | 1.996003  |
| H | 11.501360 | 2.950890  | -0.692107 |
| C | 11.612838 | 1.935456  | 1.204041  |
| H | 11.521557 | 0.709176  | 2.972249  |
| H | 12.320528 | 2.639020  | 1.630539  |
| H | -4.168234 | -0.428681 | 0.677096  |
| C | -5.350054 | -2.216240 | 2.270881  |
| H | -5.942089 | -1.296943 | 2.345662  |
| C | -6.161587 | -3.357912 | 2.680339  |
| H | -4.505456 | -2.100884 | 2.957609  |
| C | -6.816887 | -4.315508 | 2.999588  |
| H | -7.399019 | -5.157957 | 3.290094  |

85 atoms

addition of another 7-isomer unit to the 7-isomer chain end,  
structure I5, in toluene

|   |           |           |           |
|---|-----------|-----------|-----------|
| N | -5.069683 | -3.403889 | 9.706132  |
| C | -5.898773 | -2.311821 | 9.594652  |
| N | -5.773642 | -1.335511 | 10.555911 |
| C | -4.644584 | -1.251928 | 11.462146 |
| C | -4.324981 | -2.657783 | 11.953948 |
| C | -4.060205 | -3.558989 | 10.754282 |
| C | -5.710852 | -3.947736 | 7.383506  |
| C | -7.017692 | -3.236457 | 7.730935  |
| N | -6.808005 | -2.150701 | 8.674845  |
| C | -5.052901 | -4.436875 | 8.667982  |
| H | -4.921272 | -0.599140 | 12.292643 |
| H | -3.756819 | -0.810530 | 10.982081 |
| H | -5.174549 | -3.036198 | 12.529775 |
| H | -3.449253 | -2.655847 | 12.608141 |
| H | -3.064450 | -3.346970 | 10.337097 |
| H | -4.052732 | -4.609581 | 11.065123 |
| H | -4.009253 | -4.714069 | 8.481209  |
| H | -5.559119 | -5.337667 | 9.041101  |
| H | -5.045561 | -3.245463 | 6.870405  |
| H | -5.878667 | -4.793791 | 6.710621  |
| H | -7.735738 | -3.967792 | 8.134775  |
| H | -7.478141 | -2.825459 | 6.827482  |

|   |           |           |           |
|---|-----------|-----------|-----------|
| H | -6.346210 | -0.516265 | 10.394678 |
| O | -2.024857 | 1.575083  | 5.274117  |
| C | -1.976980 | 2.008738  | 6.399680  |
| O | -7.911961 | 0.302634  | 9.226999  |
| C | -8.109306 | 1.260843  | 8.199952  |
| H | -8.157967 | 2.231775  | 8.705769  |
| C | -6.963797 | 1.284783  | 7.181387  |
| H | -6.885228 | 0.291514  | 6.721261  |
| H | -7.222961 | 1.981808  | 6.376671  |
| C | -5.613365 | 1.678205  | 7.785349  |
| H | -5.374550 | 0.996473  | 8.607885  |
| H | -5.694424 | 2.679111  | 8.229787  |
| C | -4.474526 | 1.662377  | 6.761595  |
| H | -4.380050 | 0.662108  | 6.327334  |
| H | -4.712598 | 2.329737  | 5.926152  |
| C | -3.135689 | 2.074908  | 7.371251  |
| H | -2.881204 | 1.434216  | 8.224392  |
| H | -3.178653 | 3.090861  | 7.778194  |
| O | 4.257867  | -3.012034 | 5.785868  |
| O | -0.850920 | 2.500988  | 6.968176  |
| C | 4.718906  | -2.140598 | 5.087356  |
| C | 4.149405  | -0.747777 | 4.917703  |
| H | 3.963264  | -0.592329 | 3.849051  |
| H | 4.936855  | -0.032018 | 5.179249  |
| C | 2.884944  | -0.503487 | 5.738991  |
| H | 2.124627  | -1.240534 | 5.460803  |
| H | 3.101517  | -0.682794 | 6.797421  |
| C | 2.330693  | 0.913062  | 5.553556  |
| H | 2.109259  | 1.084615  | 4.493126  |
| H | 3.098703  | 1.644250  | 5.822911  |
| C | 1.062481  | 1.142732  | 6.383497  |
| H | 0.332776  | 0.366065  | 6.133447  |
| H | 1.286558  | 1.030831  | 7.451259  |
| C | 0.372615  | 2.491942  | 6.175376  |
| H | 0.092422  | 2.618745  | 5.128813  |
| C | 1.152771  | 3.726487  | 6.667813  |
| H | 0.427308  | 4.530737  | 6.824976  |
| C | 2.181528  | 4.201548  | 5.746656  |
| H | 1.593738  | 3.515342  | 7.648561  |
| C | 3.010891  | 4.627580  | 4.987720  |
| H | 3.747514  | 4.995565  | 4.312936  |
| O | 5.834261  | -2.295261 | 4.344285  |
| C | 6.478183  | -3.599233 | 4.418993  |
| C | 7.689488  | -3.568177 | 3.531608  |
| H | 5.758695  | -4.356481 | 4.102736  |
| H | 6.738875  | -3.796365 | 5.460148  |
| C | 7.582469  | -3.883988 | 2.173774  |

|   |            |           |          |
|---|------------|-----------|----------|
| C | 8.937186   | -3.201547 | 4.044108 |
| C | 8.699800   | -3.835382 | 1.343857 |
| H | 6.617753   | -4.170343 | 1.765147 |
| C | 10.057415  | -3.152395 | 3.217457 |
| H | 9.031957   | -2.954167 | 5.097418 |
| H | 8.603926   | -4.085941 | 0.292351 |
| C | 9.940134   | -3.469307 | 1.865086 |
| H | 11.021075  | -2.869703 | 3.628687 |
| H | 10.812370  | -3.434351 | 1.220342 |
| H | -7.671593  | -0.587282 | 8.850099 |
| C | -9.486891  | 1.011947  | 7.531119 |
| H | -9.452053  | 0.059552  | 6.987816 |
| C | -9.921526  | 2.077268  | 6.632953 |
| H | -10.220014 | 0.883526  | 8.333493 |
| C | -10.265417 | 2.972758  | 5.906329 |
| H | -10.577116 | 3.758840  | 5.259883 |

## REFERENCES

- 1 O. Jazkewitsch, A. Mondrzyk, R. Staffel and H. Ritter, *Macromolecules*, 2011, **44**, 1365.
- 2 A. D. Becke, *J. Chem. Phys.*, 1993, **98**, 5648.
- 3 C. Lee, W. Yang and R. G. Parr, *Phys. Rev. B*, 1988, **37**, 785.
- 4 I. Nifant'ev, A. Shlyakhtin, V. Bagrov, B. Lozhkin, G. Zakirova, P. Ivchenko and O. Legon'kova, *Reac. Kinet. Mech. Cat.*, 2016, **117**, 447.
- 5 J. Tomasi, B. Mennucci and R. Cammi, *Chem. Rev.*, 2005, **105**, 2999.
- 6 G. Scalmani and M. J. Frisch, *J. Chem. Phys.*, 2010, **132**, 114110.
- 7 B. H. Besler, K. M. Merz Jr. and P. A. Kollman, *J. Comput. Chem.*, 1990, **11**, 431.
- 8 U. C. Singh and P. A. Kollman, *J. Comput. Chem.*, 1984, **5**, 129.
- 9 F. Martin and H. Zipse, *J. Comput. Chem.*, 2005, **26**, 97.
- 10 M. J. Frisch, G. W. Trucks, H. B. Schlegel, G. E. Scuseria, M. A. Robb, J. R. Cheeseman, G. Scalmani, V. Barone, G. A. Petersson and H. Nakatsuji, *Computer Program Gaussian 16, Revision B.01*, Gaussian, Inc.: Wallingford CT, 2016.
- 11 R. Dennington, T. A. Keith and J. M. Millam, *Computer Program GaussView, Version 6*, Semichem Inc.: Shawnee Mission, KS, 2016.
- 12 P. W. Ayers, W. Yang and L. J. Bartolotti, Chapter 18 Fukui Function. In *Chemical Reactivity Theory: A DFT View*, Chattaraj, P. K., Ed. CRC Press, Taylor & Francis Group: Boca Raton, 2009; pp 255.
- 13 T. Lu and F. Chen, *J. Comput. Chem.*, 2012, **33**, 580.
- 14 T. Lu and Q. Chen, in *Conceptual Density Functional Theory*, Wiley, 2022, pp. 631.
- 15 A. Pascual, H. Sardon, F. Ruiperez, R. Gracia, P. Sudam, A. Veloso and D. Mecerreyes, *J. Polym. Sci., Part A: Polym. Chem.*, 2015, **53**, 552.
- 16 L. Simón and J. M. Goodman, *J. Org. Chem.*, 2007, **72**, 9656.
- 17 A. Chuma, H. W. Horn, W. C. Swope, R. C. Pratt, L. Zhang, B. G. G. Lohmeijer, C. G. Wade, R. M. Waymouth, J. L. Hedrick and J. E. Rice, *J. Am. Chem. Soc.*, 2008, **130**, 6749.
- 18 J. Blankenburg, E. Kersten, K. Maciol, M. Wagner, S. Zorbakhsh and H. Frey, *Polym. Chem.*, 2019, **10**, 2863.
